# Supplementary material for: Evolution of maternal and zygotic mRNA complements in the early Drosophila embryo
Source: PLoS Genet. 2018 Dec 17;14(12):e1007838. doi: 10.1371/journal.pgen.1007838 (PMC6312346; doi:10.1371/journal.pgen.1007838)
Supplement: S6 Table — Genes were assigned a value of “0” at a given stage for a given species if the FPKM level was <1 and “1” if the FPKM level was > = 1. All cases where the gene was assigned one value in the outgroup (at > = 90% posterior probability) and a different value in the ingroup at > = 90% posterior probability, are shown. The chromosome or scaffold on which the gene is located, and stage 2 and stage 5 levels, are shown for each species. (XLSX) [file pgen.1007838.s014.xlsx]

## Sheet: trans_present_90_percent_releva
Dmel_name	Stage	Dmel_chromosome	Dmel_FBgn	Dmel_st2	Dmel_st5	Dsim_name	Dsim_chromosome/scaffold	Dsim_st2	Dsim_st5	Dsec_name	Dsec_chromosome/scaffold	Dsec_st2	Dsec_st5	Dmau_name	Dmau_chromosome/scaffold	Dmau_st2	Dmau_st5	Dyak_name	Dyak_chromosome/scaffold	Dyak_st2	Dyak_st5	Dsan_name	Dsan_chromosome/scaffold	Dsan_st2	Dsan_st5	Dere_name	Dere_chromosome/scaffold	Dere_st2	Dere_st5	Dana_name	Dana_chromosome/scaffold	Dana_st2	Dana_st5	Dpse_name	Dpse_chromosome/scaffold	Dpse_st2	Dpse_st5	Dper_name	Dper_chromosome/scaffold	Dper_st2	Dper_st5	Dmir_name	Dmir_chromosome/scaffold	Dmir_st2	Dmir_st5	Dwil_name	Dwil_chromosome/scaffold	Dwil_st2	Dwil_st5
Transitions moj_vir to sophophora
0 to 1
CG17982	st2	X	FBgn0030006	8.31718	15.6219	Dsim\GD24641	Scf_X	24.7522	68.6787	Dsec\GM11207	scaffold_44	32.6201	129.442	CG17982-PA	X	77.962	153.622	Dyak\GE17478	X	15.1332	26.2532	Dyak\GE17478	X	17.3109	19.9347	Dere\GG17984	scaffold_4690	19.2675	15.4099	Dana\GF21307	scaffold_13117	22.462	109.938	Dpse\GA14753	XL_group1e	17.5679	15.305	Dper\GL20192	dper_scaffold_17	22.9875	20.6784	FBpp0282714-D1_1	Muller-A	15.7206	17.7599	Dwil\GK10132	dwil_scf2_1100000004909	21.5698	19.5706
CG15861	st5	2R	FBgn0035084	2.21571	17.951	Dsim\GD24905	Scf_2R	1.22407	10.9359	Dsec\GM11775	scaffold_23	2.25206	4.97139	CG15861-PA	2R	3.01511	8.71279	Dyak\GE11398	2R	3.22697	7.71582	Dyak\GE11398	2R	1.54267	12.9882	Dere\GG19874	scaffold_4845	5.68688	10.5777	Dana\GF11523	scaffold_13266	0.0298165	3.63571	Dpse\GA13987	3	0.197974	1.16082	Dper\GL10894	dper_scaffold_2	9.29556	2.54003	FBpp0277065-D1_1	Muller-C	7.21861	14.4532	Dwil\GK20728	dwil_scf2_1100000004510	1.90484	1.1349
CG34383	st5	3R	FBgn0085412	0.0149902	50.5568					Dsec\GM24127	scaffold_0	3.24058	4.57716	CG34383-PC	3R	0.114352	39.6636	Dyak\GE26293	3R	0.00620125	4.4339	Dyak\GE26293	3R	0.00360738	1.04532	Dere\GG19799	scaffold_4770	0.0116152	0.524069	Dana\GF16880	scaffold_13340	0	2.36965	Dpse\GA30134	2	0.0421568	27.9071					FBpp0297804-D1_1	Muller-E	0.0235331	21.1743	Dwil\GK14195	dwil_scf2_1100000004943	0.000876129	15.0551
defl	st2	3L	FBgn0036038	13.9392	28.6902	Dsim\GD14212	Scf_3L	10.7336	35.1349	Dsec\GM25181	scaffold_0	18.2454	43.76	defl-PA	3L	22.3709	47.2632	Dyak\GE20873	3L	14.1869	39.3875	Dyak\GE20873	3L	18.0779	49.4874	Dere\GG15407	scaffold_4784	12.9926	48.1568	Dana\GF24672	scaffold_13337	11.6591	23.7342													Dwil\GK10946	dwil_scf2_1100000004762	13.5401	33.1805
CG14410	st5	X	FBgn0030583	0.265405	6.21351	Dsim\GD17181	Scf_X	0.153331	4.5274	Dsec\GM12048	scaffold_32	1.67916	3.1003	CG14410-PA	X	1.61907	12.1837	Dyak\GE17156	X	0.667101	2.2043	Dyak\GE17156	X	0.0540286	1.12392	Dere\GG17853	scaffold_4690	11.5455	17.1353	Dana\GF19485	scaffold_13335	9.72148	6.41857	Dpse\GA23026	XL_group1a	0	5.42405e-19					FBpp0273492-D1_1	Muller-A	1.05953	4.54111	Dwil\GK14553	dwil_scf2_1100000004963	1.37355	1.94871
CG14883	st5	3R	FBgn0038432	41.8073	9.36987	Dsim\GD19102	Scf_3R	29.3671	1.41658	Dsec\GM15159	scaffold_12	47.2135	2.72165	CG14883-PA	3R	50.0745	3.30709	Dyak\GE24398	3R	26.9131	9.89081	Dyak\GE24398	3R	25.7716	4.29636	Dere\GG17006	scaffold_4770	39.8967	12.8061	Dana\GF18499	scaffold_13340	27.9619	6.8046	Dpse\GA13320	2	15.8297	6.6052	Dper\GL22177	dper_scaffold_3	21.1218	7.63231	FBpp0284436-D1_1	Muller-E	19.2987	11.2903	Dwil\GK14482	dwil_scf2_1100000004943	65.0654	17.771
CG8112	st5	3R	FBgn0037612	31.2575	20.9578	Dsim\GD18564	Scf_3R	30.2498	12.0318	Dsec\GM23753	scaffold_0	47.2057	16.5063	CG8112-PA	3R	38.6094	19.1164	Dyak\GE25896	3R	147.317	14.7672	Dyak\GE25896	3R	33.6608	15.2169	Dere\GG12153	scaffold_4770	114.661	37.7811	Dana\GF18181	scaffold_13340	31.4311	15.5027	Dpse\GA20833	2	52.5288	3.2207	Dper\GL12471	dper_scaffold_6	42.1414	4.99991	FBpp0284771-D1_1	Muller-E	51.7338	13.292	Dwil\GK11809	dwil_scf2_1100000004902	43.1248	3.67331
Vha68-1	st5	2L	FBgn0265262	0.465621	9.03621	Dsim\Vha68-1	Scf_2L	6.63546	6.87734	Dsec\GM25943	scaffold_16	0.286086	6.14397	Vha68-1-PA	2L	3.69709	5.58302	Dyak\GE11978	2L	0.449552	35.3345	Dyak\GE11978	2L	1.60027	26.7297	Dere\GG10233	scaffold_4929	2.6649	19.0643	Dana\GF15651	scaffold_12916	0.0525594	2.30303	Dpse\GA11612	4_group4	24.5855	18.7228	Dper\GL24783	dper_scaffold_46	64.812	33.5747	FBpp0287629-D2_1	Muller-B	118.323	15.6702	Dwil\GK14815	dwil_scf2_1100000004521	7.00338	8.81597
Cdk5	st5	2R	FBgn0013762	20.8736	22.076	Dsim\GD25609	Scf_2R	31.3089	19.8042	Dsec\GM20132	scaffold_1	20.6552	14.4589	Cdk5-PA	2R	15.9885	3.73258	Dyak\GE14145	2R	38.3642	17.2901	Dyak\GE14145	2R	64.0813	14.4899	Dere\GG22344	scaffold_4845	10.1806	11.6932	Dana\GF22626	scaffold_12943	14.8508	74.7459	Dpse\GA20894	3	14.2699	24.8996	Dper\GL11507	dper_scaffold_2	18.0875	23.1149					Dwil\GK21950	dwil_scf2_1100000004513	49.7738	10.5225
CG33493	st5	3L	FBgn0053493	0.204712	11.2587	Dsim\GD12854	Scf_3L	0.108901	2.79832	Dsec\GM24802	scaffold_0	0.203227	4.62015	CG33493-PA	3L	0	2.63488e-208	Dyak\GE20263	3L	3.38091e-81	1.24515e-32	Dyak\GE20263	3L	0	2.54218e-75	Dere\GG13965	scaffold_4784	0	1.95322e-53	Dana\GF23823	scaffold_13337	0	6.13543	Dpse\GA28304	XR_group8	0	4.28361	Dper\GL20741	dper_scaffold_29	0	3.21121					Dwil\GK16794	dwil_scf2_1100000004511	0.0784148	1.06595
CG32053	st5	3L	FBgn0052053	0.00590778	2.22502	Dsim\GD12875	Scf_3L	0	1.17229	Dsec\GM24823	scaffold_0	0	4.06662	CG32053-PA	3L	0.0770861	1.44574	Dyak\GE20285	3L	0	8.71211	Dyak\GE20285	3L	0.0100994	10.8769	Dere\GG13989	scaffold_4784	0.00906642	9.76697	Dana\GF23846	scaffold_13337	0	10.8516	Dpse\GA16641	XR_group6	0.0959057	4.10295	Dper\GL11817	dper_scaffold_27	0.10702	8.12957	FBpp0275251-D1_1	Muller-AD	1.15551	1.75617	Dwil\GK24100	dwil_scf2_1100000004837	0	3.92554
Crtc	st5	3L	FBgn0036746	16.6871	5.44079	Dsim\GD12387	Scf_3L	19.5303	6.72805	Dsec\GM24316	scaffold_0	23.176	5.46013	TORC-PA	3L	20.9046	4.77255	Dyak\GE22130	3L	25.2721	9.11174	Dyak\GE22130	3L	18.2639	5.21981	Dere\GG15792	scaffold_4784	16.3956	6.18099					Dpse\GA19332	XR_group6	2.04769	0.111478	Dper\GL25225	dper_scaffold_9	32.3755	6.27473	FBpp0275042-D1_1	Muller-AD	23.9423	1.87345	Dwil\GK12332	dwil_scf2_1100000004830	19.8255	29.2864
CG3609	st5	2L	FBgn0031418	24.5052	72.7909	Dsim\GD22839	Scf_2L	33.1978	8.35857	Dsec\GM18233	scaffold_5	24.3424	3.11155	CG3609-PA	2L	25.7728	13.2305	Dyak\GE15118	2L	23.4108	7.96182	Dyak\GE15118	2L	16.1988	16.0749	Dere\GG24525	scaffold_4929	32.7432	2.4447	Dana\GF15278	scaffold_12916	15.5843	28.7158	Dpse\GA17556	4_group3	21.0258	3.77703	Dper\GL19398	dper_scaffold_1	18.9689	4.87439	FBpp0280520-D1_1	Muller-B	19.2649	3.25023	Dwil\GK14982	dwil_scf2_1100000004521	32.6443	10.8972
CG10778	st5	X	FBgn0029980	24.4585	24.3905	Dsim\GD16139	Scf_X	32.9377	33.1961	Dsec\GM11961	scaffold_50	34.4189	31.6692	CG10778-PA	X	21.3462	20.7942	Dyak\GE17496	X	42.6966	7.66819	Dyak\GE17496	X	37.9538	22.5539	Dere\GG17596	scaffold_4690	27.5203	41.7709	Dana\GF20994	scaffold_13117	31.4755	19.652	Dpse\GA10557	XL_group1a	18.9708	69.4978	Dper\GL15247	dper_scaffold_28	5.90958	12.6992					Dwil\GK16221	dwil_scf2_1100000004590	58.2174	29.3463
CG31637	st5	2L	FBgn0051637	11.4271	3.94385	Dsim\GD23416	Scf_2L	14.1086	4.00489	Dsec\GM18635	scaffold_5	5.14583	2.31234	CG31637-PA	2L	15.0404	4.75714	Dyak\GE13933	2L	18.8666	4.12508	Dyak\GE13933	2L	16.953	4.88502	Dere\GG10418	scaffold_4929	9.08445	0.878185	Dana\GF14169	scaffold_12916	13.7602	5.38636	Dpse\GA16353	4_group1	15.6318	8.30046	Dper\GL25675	dper_scaffold_5	19.7222	6.52078	FBpp0279309-D1_1	Muller-B	17.9582	6.52999	Dwil\GK18727	dwil_scf2_1100000004884	26.583	4.90581
A16	st5	2L	FBgn0028965	29.2939	35.8949	Dsim\GD22091	Scf_2L	35.4185	34.5365	Dsec\GM25921	scaffold_16	24.8106	46.5984	A16-PA	2L	25.6187	31.7536	Dyak\GE11956	2L	43.0969	71.9141	Dyak\GE11956	2L	32.9572	102.868	Dere\GG10231	scaffold_4929	34.3584	59.4001	Dana\GF15649	scaffold_12916	30.6292	60.2694	Dpse\GA22135	4_group4	37.9243	16.3996	Dper\GL24779	dper_scaffold_46	41.6935	18.39	FBpp0287627-D1_1	Muller-B	100.99	46.3835	Dwil\GK14813	dwil_scf2_1100000004521	25.5883	39.3962
MED4	st5	3L	FBgn0035754	23.1634	31.8869	Dsim\GD13079	Scf_3L	24.7122	36.8911	Dsec\GM13780	scaffold_2	7.07163e-43	17.2752	MED4-PA	3L	2.13654	12.865	Dyak\GE20432	3L	27.6457	20.7101	Dyak\GE20432	3L	32.5767	20.3271	Dere\GG14986	scaffold_4784	14.9584	34.6355	Dana\GF23865	scaffold_13337	38.7754	35.3753	Dpse\GA21204	XR_group6	3.73488e-31	23.6049	Dper\GL24898	dper_scaffold_9	34.1222	100.579	FBpp0274522-D1_1	Muller-AD	19.3264	67.4799	Dwil\GK13126	dwil_scf2_1100000004762	31.4354	18.7155
Six4	st5	3L	FBgn0027364	0.00753303	6.2518	Dsim\GD12161	Scf_3L	0	5.0134	Dsec\GM22186	scaffold_11	0	2.97736	Six4-PA	3L	0	7.88156									Dere\GG13283	scaffold_4784	0	8.92712	Dana\GF24111	scaffold_13337	0	13.9143	Dpse\GA17741	XR_group8	0.00644436	3.19773	Dper\GL12751	dper_scaffold_40	0.00379601	4.27062	FBpp0286037-D1_1	Muller-AD	5.50006e-106	1.29513	Dwil\GK12359	dwil_scf2_1100000004762	0.0107725	1.93395
CG7506	st2	3L	FBgn0035805	22.6968	65.4261	Dsim\GD13042	Scf_3L	11.9982	52.7093	Dsec\GM13741	scaffold_2	31.2084	93.9748	CG7506-PA	3L	29.6555	61.1839	Dyak\GE20398	3L	28.205	60.4372	Dyak\GE20398	3L	42.5953	64.9023	Dere\GG14946	scaffold_4784	22.2918	33.2406	Dana\GF23773	scaffold_13337	21.8254	104.854	Dpse\GA20399	XR_group6	24.2796	27.9519	Dper\GL24121	dper_scaffold_12	40.4523	111.489	FBpp0274701-D1_1	Muller-AD	33.0493	50.7285	Dwil\GK24268	dwil_scf2_1100000004837	30.9888	22.3438
Atg18b	st2	2L	FBgn0032935	5.28401	8.55886	Dsim\GD21643	Scf_2L	0.531809	4.35764	Dsec\GM23265	scaffold_18	27.54	10.136	CG8678-PA	2L	0.37227	5.33559	Dyak\GE12992	2R	1.15731	8.35994	Dyak\GE12992	2R	36.2604	19.2664	Dere\GG21513	scaffold_4845	21.4546	18.0444	Dana\GF15570	scaffold_12916	2.78457	8.60776	Dpse\GA21256	4_group4	34.5814	19.2406	Dper\GL26366	dper_scaffold_10	29.5133	37.4444	FBpp0287460-D1_1	Muller-B	21.2449	6.48425	Dwil\GK14682	dwil_scf2_1100000004521	1.54177	12.8687
CG17219	st2	2L	FBgn0031494	4.48022	38.5043	Dsim\GD23200	Scf_2L	2.46722	8.29128					CG17219-PA	2L	0.000286436	24.8584	Dyak\GE18203	2L	2.04919	23.3105	Dyak\GE18203	2L	3.49433	19.1548	Dere\GG24912	scaffold_4929	3.15947	15.8977	Dana\GF15142	scaffold_12916	13.8391	15.4869	Dpse\GA14398	4_group3	7.78634	5.55043	Dper\GL18544	dper_scaffold_1	6.16628	3.1855	FBpp0279837-D1_1	Muller-B	5.30132	17.593	Dwil\GK15177	dwil_scf2_1100000004521	3.53474	4.99397
Ctr1A	st5	X	FBgn0062413	17.094	8.24783	Dsim\GD16812	Scf_X	14.5908	9.8378	Dsec\GM12509	scaffold_4	12.3008	11.6965	Ctr1A-PA	X	13.4425	10.9483	Dyak\GE16762	X	21.4731	10.0827	Dyak\GE16762	X	15.0898	14.6668	Dere\GG19602	scaffold_4690	18.3531	15.1428	Dana\GF22272	scaffold_12929	49.486	15.184	Dpse\GA17816	XL_group1a	15.5232	24.6979	Dper\GL13345	dper_scaffold_26	18.2369	35.6218					Dwil\GK25589	dwil_scf2_1100000004909	48.552	17.8573
CG9436	st5	2R	FBgn0033101	40.3945	10.3648	Dsim\GD10303	Scf_2R	41.9939	0.0929545					CG9436-PA	2R	18.8637	0.0605807	Dyak\GE24510	2L	40.1904	0.725998	Dyak\GE24510	2L	34.2534	0.239186	Dere\GG10801	scaffold_4929	36.4117	31.9652	Dana\GF13790	scaffold_13266	17.1717	1.94448	Dpse\GA21786	3	14.4569	18.1924	Dper\GL10976	dper_scaffold_2	17.5531	26.2589					Dwil\GK22153	dwil_scf2_1100000004558	46.7763	9.38106
CG10209	st5	2R	FBgn0033971	22.5226	8.87444	Dsim\GD25653	Scf_2R	11.0808	13.9134	Dsec\GM20176	scaffold_1	14.3362	17.0541	CG10209-PA	2R	8.70946	8.00312	Dyak\GE12282	2R	17.2837	14.8803	Dyak\GE12282	2R	24.506	21.5502	Dere\GG22393	scaffold_4845	16.6415	0.304093	Dana\GF19781	scaffold_13266	19.1034	3.13538	Dpse\GA10157	3	2.54841	0.0062586	Dper\GL10653	dper_scaffold_2	28.5022	5.97063	FBpp0276812-D1_1	Muller-C	28.5481	80.2851	Dwil\GK23291	dwil_scf2_1100000004954	26.9765	13.3427
CG1444	st5	X	FBgn0029975	70.145	21.3942	Dsim\GD16868	Scf_X	46.9843	10.3394	Dsec\GM11981	scaffold_50	88.0158	25.5472	CG1444-PA	X	86.887	20.6689	Dyak\GE15745	X	69.889	34.4132	Dyak\GE15745	X	34.0508	28.9719	Dere\GG19668	scaffold_4690	89.2388	53.9493	Dana\GF21190	scaffold_13117	39.3484	26.4651	Dpse\GA12987	XL_group1e	88.9776	6.73487	Dper\GL18340	dper_scaffold_30	107.55	2.75226	FBpp0284942-D1_1	Muller-A	94.8068	17.3159	Dwil\GK10112	dwil_scf2_1100000004909	55.0269	92.498
Mlp84B	st5	3R	FBgn0014863	0.0318469	9.5811	Dsim\GD19505	Scf_3R	0.0437605	2.14961	Dsec\GM10508	scaffold_6	0.00933571	1.67976	Mlp84B-PA	3R	0.0140087	1.65868	Dyak\GE25818	3R	0.361555	0.728218	Dyak\GE25818	3R	0.158325	1.05733	Dere\GG10080	scaffold_4770	0.00864702	1.71288	Dana\GF17323	scaffold_13340	0.0111383	8.23321	Dpse\GA26225	2	0.00419749	2.32796	Dper\GL12199	dper_scaffold_6	0.102962	2.98656					Dwil\GK19204	dwil_scf2_1100000004902	0.00496291	12.7537
CG5380	st2	3R	FBgn0038951	11.1562	8.76266	Dsim\GD18467	Scf_3R	11.0146	12.0262	Dsec\GM23658	scaffold_0	4.25224	13.0507	CG5380-PA	3R	14.2665	20.5649	Dyak\GE24046	3R	5.89495	9.1133	Dyak\GE24046	3R	11.2166	6.68145	Dere\GG12523	scaffold_4820	3.67596	7.32032	Dana\GF16937	scaffold_13340	41.3117	32.649	Dpse\GA18836	2	25.4044	41.0704	Dper\GL24167	dper_scaffold_0	17.2032	30.7157					Dwil\GK11949	dwil_scf2_1100000004902	7.63603	33.0119
pug	st2	3R	FBgn0020385	9.5142	32.7309	Dsim\GD18702	Scf_3R	15.3768	61.0083	Dsec\GM23891	scaffold_0	38.645	131.121	pug-PB	3R	48.6422	131.509	Dyak\GE26043	3R	61.8052	55.1884	Dyak\GE26043	3R	48.5971	40.6619	Dere\GG17628	scaffold_4770	26.8613	60.3779	Dana\GF17545	scaffold_13340	2.20522	11.5186	Dpse\GA13173	2	5.80627	7.49478	Dper\GL11980	dper_scaffold_6	31.0263	18.9504					Dwil\GK11804	dwil_scf2_1100000004902	12.8193	36.0113
ATP7	st5	X	FBgn0030343	16.3776	7.85335	Dsim\GD17052	Scf_X	17.5594	5.40672	Dsec\GM13114	scaffold_36	28.7403	6.63158	ATP7-PB	X	16.3501	7.18786	Dyak\GE15670	X	18.9128	9.85913	Dyak\GE15670	X	19.6884	7.31555	Dere\GG18448	scaffold_4690	19.8218	8.99751	Dana\GF19483	scaffold_13335	17.7223	4.79185	Dpse\GA22624	XL_group1a	18.8539	3.54528	Dper\GL12896	dper_scaffold_13	14.7372	8.3442e-06	FBpp0272696-D1_1	Muller-A	33.4599	11.0417	Dwil\GK14532	dwil_scf2_1100000004963	15.273	9.10198
CG10307	st5	2R	FBgn0034655	136.058	96.3277	Dsim\GD11618	Scf_2R	0.687846	8.13745	Dsec\GM15856	scaffold_9	0.0353763	6.03296	CG10307-PA	2R	0	5.57942	Dyak\GE12214	2R	0.0290923	1.38962	Dyak\GE12214	2R	0.0492733	6.85753	Dere\GG22132	scaffold_4845	0.253594	0.891588	Dana\GF13262	scaffold_13266	1.24568	4.43396	Dpse\GA10235	3	3.31759	14.1381					FBpp0276973-D1_1	Muller-C	0.156583	1.18968	Dwil\GK10741	dwil_scf2_1100000004382	0.0284221	1.13361
CG32537	st2	X	FBgn0052537	4.76277	6.89146	Dsim\GD15587	Scf_X	1.9266	1.19967	Dsec\GM22751	scaffold_8	4.16696e-05	0.703195					Dyak\GE17400	X	8.01312	4.65917	Dyak\GE17400	X	2.47812	2.13716	Dere\GG18064	scaffold_4690	10.0993	17.0937	Dana\GF15951	scaffold_12903	3.2922	0.000133742					Dper\GL12989	dper_scaffold_13	5.32384	6.17801					Dwil\GK25205	dwil_scf2_1100000004909	1.46501	6.20575
CG6696	st2	X	FBgn0030947	2.71998	3.56898	Dsim\GD24468	Scf_NODE_39788	2.48401	11.372	Dsec\GM22792	scaffold_8	3.65186	10.5634	CG6696-PA	X	4.13311	8.00225	Dyak\GE15503	X	2.35438	1.43222	Dyak\GE15503	X	5.58867	2.91366	Dere\GG18102	scaffold_4690	8.6929	11.7113	Dana\GF22400	scaffold_13248	1.67759	2.55863	Dpse\GA19789	XL_group3a	1.12007	5.09956	Dper\GL27016	dper_scaffold_39	1.93156	5.84043	FBpp0272266-D1_1	Muller-A	1.15212	6.004	Dwil\GK24951	dwil_scf2_1100000004909	8.03252	6.04156
eIF4G2	st5	3R	FBgn0260634	26.2889	5.31323	Dsim\GD18348	Scf_3R	25.9628	9.97572	Dsec\GM23535	scaffold_0	23.0086	4.5412	eIF4G2-PA	3R	25.4833	4.99626	Dyak\GE23919	3R	17.7494	7.49734	Dyak\GE23919	3R	18.8725	5.99634	Dere\GG12400	scaffold_4820	8.35135	10.3043	Dana\GF18734	scaffold_13340	13.1504	5.51694	Dpse\GA26552	2	5.80539	0.792379	Dper\GL24266	dper_scaffold_0	20.7553	2.57292					Dwil\GK11981	dwil_scf2_1100000004902	27.5508	5.20596
CG7429	st5	2L	FBgn0031979	10.0168	1.49109e-96	Dsim\GD23500	Scf_2L	12.2003	2.45286	Dsec\GM16698	scaffold_3	11.8221	2.67584	CG7429-PA	2L	9.79328	1.86753	Dyak\GE18730	2L	13.5764	1.00089e-192	Dyak\GE18730	2L	3.77922	1.80357	Dere\GG10509	scaffold_4929	9.73214	2.50855	Dana\GF14575	scaffold_12916	23.8406	3.0874	Dpse\GA20344	4_group3	19.7217	3.38387	Dper\GL18739	dper_scaffold_1	20.7106	4.01694	FBpp0280047-D1_1	Muller-B	26.0911	8.47388	Dwil\GK15316	dwil_scf2_1100000004521	25.2252	5.74176
Cht8	st5	2R	FBgn0034580	0.0167712	5.71001					Dsec\GM15800	scaffold_9	7.88702	17.0453	Cht8-PA	2R	3.8606e-155	4.65525e-37	Dyak\GE12162	2R	4.63353	9.08415	Dyak\GE12162	2R	5.1729	12.9672	Dere\GG22081	scaffold_4845	4.14638	14.3827	Dana\GF11929	scaffold_13266	5.69945	6.54362	Dpse\GA25090	3	15.6536	25.3374	Dper\GL10147	dper_scaffold_31	0.00294873	2.75005					Dwil\GK23269	dwil_scf2_1100000004954	4.60143	8.7166
CG17322	st2	2L	FBgn0027070	40.8549	18.6322	Dsim\GD24160	Scf_2L	16.2335	30.1134	Dsec\GM17297	scaffold_7	0.11519	0.000139413	CG17322-PC	2L	26.1702	39.2289	Dyak\GE13210	2R	0.916869	1.20754	Dyak\GE13210	2R	3.72911	0.247892	Dere\GG21136	scaffold_4845	0.100347	0.0736925					Dpse\GA14456	4_group3	1.03544	2.36246									Dwil\GK14593	dwil_scf2_1100000004521	6.49011	14.4445
CG17322	st5	2L	FBgn0027070	40.8549	18.6322	Dsim\GD24160	Scf_2L	16.2335	30.1134	Dsec\GM17297	scaffold_7	0.11519	0.000139413	CG17322-PC	2L	26.1702	39.2289	Dyak\GE13210	2R	0.916869	1.20754	Dyak\GE13210	2R	3.72911	0.247892	Dere\GG21136	scaffold_4845	0.100347	0.0736925					Dpse\GA14456	4_group3	1.03544	2.36246									Dwil\GK14593	dwil_scf2_1100000004521	6.49011	14.4445
CG7255	st2	3L	FBgn0036493	16.7701	2.69441	Dsim\GD14536	Scf_3L	16.0605	0.198482	Dsec\GM25522	scaffold_0	15.8236	0.321658	CG7255-PF	3L	13.9114	1.0567	Dyak\GE22234	3L	12.3841	2.22189	Dyak\GE22234	3L	6.68664	3.36455	Dere\GG15892	scaffold_4784	13.5868	0.885738	Dana\GF23694	scaffold_13337	5.52864	0.232409	Dpse\GA20214	XR_group6	29.1518	64.7555	Dper\GL24792	dper_scaffold_12	20.9856	55.3369	FBpp0274774-D1_1	Muller-AD	20.5763	62.5976	Dwil\GK20407	dwil_scf2_1100000004768	16.9295	0.349038
CG3394	st2	2R	FBgn0034999	17.4729	0.0241595	Dsim\GD11850	Scf_2R	62.5869	1.01435	Dsec\GM11851	scaffold_23	107.404	2.22434	CG3394-PA	2R	36.4657	0.435162	Dyak\GE14396	2R	80.7521	4.05179	Dyak\GE14396	2R	23.0276	7.45349	Dere\GG22959	scaffold_4845	26.1545	1.28645	Dana\GF11390	scaffold_13266	23.8268	0.389876	Dpse\GA24089	3	22.2994	0.358726	Dper\GL20024	dper_scaffold_34	29.9787	0.828073	FBpp0306375-D1_1	Muller-C	11.8937	0.810132	Dwil\GK22202	dwil_scf2_1100000004558	31.8338	0.440863
CG14562	st5	3L	FBgn0037142	15.0623	3.4402	Dsim\GD15010	Scf_3L	17.9476	6.46937	Dsec\GM22418	scaffold_11	21.7688	5.66297	CG14562-PA	3L	18.799	4.40046	Dyak\GE22594	3L	15.9713	11.2167	Dyak\GE22594	3L	18.7917	13.4542	Dere\GG16234	scaffold_4784	10.0698	5.10056	Dana\GF10935	scaffold_13337	7.49019	5.29109	Dpse\GA13081	XR_group8	11.8331	10.0288	Dper\GL25414	dper_scaffold_45	20.1192	11.918	FBpp0286998-D1_1	Muller-AD	18.1487	12.1619	Dwil\GK10629	dwil_scf2_1100000004762	1.16855	16.0082
CAH2	st2	3L	FBgn0027843	32.6576	0.723705	Dsim\GD14364	Scf_3L	44.8331	0.120636	Dsec\GM25332	scaffold_0	80.9621	1.32791	CAH2-PA	3L	80.5732	0.49597	Dyak\GE21890	3L	17.9111	0.33888	Dyak\GE21890	3L	26.0811	1.03753	Dere\GG15564	scaffold_4784	15.0138	0.337094					Dpse\GA19947	XR_group6	3.96172	4.08773	Dper\GL25159	dper_scaffold_9	5.57175	2.55003	FBpp0274975-D1_1	Muller-AD	6.87025	4.29332	Dwil\GK13282	dwil_scf2_1100000004762	2.51769	2.65217
yellow-c	st5	2L	FBgn0041713	0.006806	0.0385801	Dsim\GD23989	Scf_2L	2.16745	21.9153	Dsec\GM15882	scaffold_3	1.41049	16.8183	yellow-c-PA	2L	3.77146	19.7463	Dyak\GE20803	2L	0.00809522	1.96864	Dyak\GE20803	2L	0.255408	5.54091	Dere\GG25141	scaffold_4929	0.528539	6.34079	Dana\GF14904	scaffold_12916	1.60917	1.95784	Dpse\GA18010	4_group1	0.230654	4.59339	Dper\GL26025	dper_scaffold_5	0.146183	6.65487	FBpp0279009-D1_1	Muller-B	0.85692	17.7641	Dwil\GK18310	dwil_scf2_1100000004577	0.0329103	7.0387
didum	st5	2R	FBgn0261397	20.4093	3.66823	Dsim\GD10485	Scf_2R	23.5171	3.92393	Dsec\GM20959	scaffold_1	28.4627	3.16919	didum-PC	2R	13.63	1.47545	Dyak\GE19129	2L	36.2571	7.90694	Dyak\GE19129	2L	33.7192	4.14653	Dere\GG23282	scaffold_4929	21.4577	0.730432	Dana\GF11201	scaffold_13266	17.879	3.23558	Dpse\GA15267	3	21.6954	2.6621	Dper\GL20011	dper_scaffold_44	33.7072	3.32907	FBpp0307517-D1_1	Muller-C	10.6124	3.91107	Dwil\GK10684	dwil_scf2_1100000004382	43.0117	3.54915
CG1824	st5	X	FBgn0030403	9.15351	15.4297	Dsim\GD15923	Scf_X	12.1611	22.265	Dsec\GM11542	scaffold_21	10.1281	14.7298	CG1824-PA	X	6.84177	12.0813	Dyak\GE16208	X	12.7089	15.0746	Dyak\GE16208	X	9.40864	24.2433	Dere\GG19546	scaffold_4690	5.25592	23.8975	Dana\GF20900	scaffold_13117	13.3206	13.6276	Dpse\GA14849	XL_group1a	5.79126	1.76457	Dper\GL25340	dper_scaffold_12	17.1907	4.29278	FBpp0273348-D1_1	Muller-AD	25.3872	3.0529	Dwil\GK25432	dwil_scf2_1100000004909	19.8543	8.14971
CG33181	st5	X	FBgn0053181	41.3417	5.89195	Dsim\GD16906	Scf_X	70.8871	4.7703	Dsec\GM21669	scaffold_35	63.4824	19.8282	CG33181-PC	X	63.541	9.16715	Dyak\GE15789	X	65.2991	8.2877	Dyak\GE15789	X	59.9299	16.5299	Dere\GG18258	scaffold_4690	64.4988	3.09343	Dana\GF22372	scaffold_13248	20.5403	2.8829	Dpse\GA28837	XL_group1e	54.7403	2.71466					FBpp0287469-D1_1	Muller-A	88.6046	6.60132	Dwil\GK19994	dwil_scf2_1100000004515	39.7241	26.9258
CG34316	st5	3R	FBgn0085345	0.152316	2.02541	Dsim\GD18997	Scf_3R	3.16974	13.2525	Dsec\GM24207	scaffold_0	8.23475	22.3731	CG34316-PA	3R	9.81283	23.0221	Dyak\GE24281	3R	5.67889	7.39835	Dyak\GE24281	3R	6.97266	10.1873	Dere\GG16899	scaffold_4770	4.70135	5.77542	Dana\GF11366	scaffold_13250	0.776762	4.56932	Dpse\GA27543	2	11.6839	26.8991	Dper\GL12533	dper_scaffold_6	3.01486	7.80245	FBpp0284834-D1_1	Muller-E	5.94376	24.3775	Dwil\GK14489	dwil_scf2_1100000004943	2.97667	7.96335
Ndae1	st2	2L	FBgn0259111	2.99847	72.7979	Dsim\GD22503	Scf_2L	12.8569	5.2393	Dsec\GM13591	scaffold_3	23.6814	57.3937	Ndae1-PC	2L	4.0889	88.9179	Dyak\GE18368	2L	16.1386	43.0822	Dyak\GE18368	2L	7.9021	75.2496	Dere\GG23542	scaffold_4929	2.83769	68.078	Dana\GF14032	scaffold_12916	19.09	12.3448	Dpse\GA18347	4_group3	11.8521	1.50075	Dper\GL19233	dper_scaffold_1	15.5216	0.293449	FBpp0280349-D1_1	Muller-B	12.4276	0.150129	Dwil\GK24730	dwil_scf2_1100000004585	25.2224	0.0958817
CG3184	st5	X	FBgn0029892	5.0629	7.01888					Dsec\GM12563	scaffold_4	2.55553	1.31521	CG3184-PA	X	1.35237	6.27386	Dyak\GE16453	X	0	0.413314	Dyak\GE16453	X	1.01279e-16	1.27579	Dere\GG17664	scaffold_4690	10.4686	4.36342	Dana\GF20846	scaffold_13117	6.49991e-294	3.68617	Dpse\GA16516	XL_group1a	3.59494	15.4287	Dper\GL13368	dper_scaffold_26	8.78398e-62	10.1933	FBpp0273126-D1_1	Muller-A	11.4853	54.1341	Dwil\GK25004	dwil_scf2_1100000004909	3.24528	11.147
CG42375	st2		FBgn0259721							Dsec\GM24132	scaffold_0	41.5382	103.383	CG42375-PA	3R	31.7819	13.3088	Dyak\GE26299	3R	44.5095	100.931	Dyak\GE26299	3R	37.2219	152.338	Dere\GG19826	scaffold_4770	35.3281	162.893	Dana\GF18618	scaffold_13340	16.0891	85.4326	Dpse\GA26499	2	19.451	29.5965	Dper\GL24084	dper_scaffold_0	27.5286	27.5068					Dwil\GK14199	dwil_scf2_1100000004943	7.65863	12.1951
1 to 0
CG16786	st5	2R	FBgn0034974	0.00280347	0.160793	Dsim\GD15461	Scf_2R	0.0221916	0.0333843	Dsec\GM18304	scaffold_5	0.0649396	0.318289	CG16786-PB	2R	0.0222124	0.278549	Dyak\GE14377	2R	0.00900411	2.95538	Dyak\GE14377	2R	0.00689004	1.30681	Dere\GG22939	scaffold_4845	0	0.927544	Dana\GF11370	scaffold_13266	0	0.0414986	Dpse\GA14148	3	0.0132298	0.0464914	Dper\GL11665	dper_scaffold_2	0.0101198	0.0818036					Dwil\GK21920	dwil_scf2_1100000004513	0.0374249	0.282433
CG7990	st2	X	FBgn0030997	0.0189708	0.952043	Dsim\GD15597	Scf_X	0.0743946	0.403286	Dsec\GM22761	scaffold_8	0.0172484	0.147835					Dyak\GE15469	X	0	0.103122	Dyak\GE15469	X	0.0182108	0.037251	Dere\GG18072	scaffold_4690	0	0.169769	Dana\GF16001	scaffold_12903	1.02679	0.82838	Dpse\GA25860	XL_group1e	0.115366	4.85643	Dper\GL13016	dper_scaffold_13	0	14.3741	FBpp0280248-D1_1	Muller-A	4.66409	23.5032	Dwil\GK25756	dwil_scf2_1100000004909	1.27462	1.43086
gce	st2	X	FBgn0261703	0.0469226	0.0119221	Dsim\GD17204	Scf_X	0.127166	0.119997	Dsec\GM19712	scaffold_56	0.139961	0.0695917	gce-PC	X	0.0482199	0.0928016	Dyak\GE17175	X	0.0180069	0.0929059	Dyak\GE17175	X	0.111282	0	Dere\GG17873	scaffold_4690	0.425545	0.329044	Dana\GF21231	scaffold_13117	1.3167	3.59823	Dpse\GA19443	XL_group1a	0.035693	0.293308	Dper\GL15999	dper_scaffold_53	0.0527342	1.68527					Dwil\GK16199	dwil_scf2_1100000004590	0.000937197	0.0146107
CG6053	st5	3L	FBgn0036195	0	3.88076e-14	Dsim\GD12783	Scf_3L	9.31679	54.2877	Dsec\GM24721	scaffold_0	0.0878748	2.2385	CG6053-PB	3L	0.0104117	1.039	Dyak\GE20187	3L	0.472105	1.22943	Dyak\GE20187	3L	0	0.699186	Dere\GG13896	scaffold_4784	0	0.934982	Dana\GF24523	scaffold_13337	0	0	Dpse\GA19324	XR_group6	0.192476	1.64311	Dper\GL16341	dper_scaffold_61	0	0.608362	FBpp0275398-D1_1	Muller-AD	0	0.500185	Dwil\GK10479	dwil_scf2_1100000004762	1.63614e-24	0.026408
CG8564	st5	3L	FBgn0035776	0.0130395	0.632478					Dsec\GM13762	scaffold_2	0.00638864	2.85588	CG8564-PA	3L	0.0135979	2.13494	Dyak\GE20415	3L	0.00315264	0.0893146	Dyak\GE20415	3L	0	0.070212	Dere\GG14967	scaffold_4784	0	0.0747878	Dana\GF23790	scaffold_13337	0	0.025623	Dpse\GA21167	XR_group6	0.00597481	0.0765822	Dper\GL24286	dper_scaffold_12	0	0.0229327	FBpp0274717-D1_1	Muller-AD	0	0.0290934	Dwil\GK16807	dwil_scf2_1100000004511	0.366134	0.425687
CG31028	st2	3R	FBgn0051028	0	0.0780744	Dsim\GD17268	Scf_3R	0	0.0405724	Dsec\GM12175	scaffold_4	0.00475989	0.0704637					Dyak\GE23406	3R	0	0.27394	Dyak\GE23406	3R	0	0.251556	Dere\GG11957	scaffold_4820	0	0.657123	Dana\GF16197	scaffold_13340	0	0.130327	Dpse\GA26944	2	0.0039111	0.0124659	Dper\GL14064	dper_scaffold_7	0.00106698	0	FBpp0291880-D1_1	Muller-E	0.00476712	0.00483435	Dwil\GK13146	dwil_scf2_1100000004943	0.349964	0.953921
CG43980	st5	3L	FBgn0264711	0	0.0200706	Dsim\GD14985	Scf_3L	0	0.130155	Dsec\GM22396	scaffold_11	0	0.439541	CG33291-PA	3L	0	0.132571	Dyak\GE19783	3L	0.00369883	1.61686	Dyak\GE19783	3L	0	0.283894	Dere\GG16214	scaffold_4784	0	0.0652	Dana\GF25161	scaffold_13337	0	0.062119	Dpse\GA23532	XR_group6	0.00190884	0.0951608					FBpp0274473-D1_1	Muller-AD	0	0.0819034	Dwil\GK17055	dwil_scf2_1100000004511	0.0123015	0.121264
CG15412	st2	2L	FBgn0031528	0.0244318	2.50273	Dsim\GD22761	Scf_2L	0.0161955	4.24141	Dsec\GM18150	scaffold_5	0.0450354	2.14309	CG15412-PB	2L	0.126738	2.49332	Dyak\GE14886	2L	5.50897	33.1322	Dyak\GE14886	2L	6.20249	39.405	Dere\GG24444	scaffold_4929	0	3.31544	Dana\GF15683	scaffold_12916	0.147116	0.17683	Dpse\GA13710	4_group3	7.68857	13.9063	Dper\GL19521	dper_scaffold_1	0	0.226958					Dwil\GK14597	dwil_scf2_1100000004521	0.00509448	0.117476
CG8369	st2	3R	FBgn0040532	0.118189	4.26546					Dsec\GM23768	scaffold_0	0	0.612119	CG8369-PA	3R	0.0739831	15.0097	Dyak\GE25912	3R	0.0825638	57.957	Dyak\GE25912	3R	9.29347e-200	289.867	Dere\GG13324	scaffold_4770	0.0164562	74.1777	Dana\GF18194	scaffold_13340	0.34263	6.84646	Dpse\GA21026	2	0.0791609	0.674998	Dper\GL21551	dper_scaffold_3	0	0	FBpp0281444-D1_1	Muller-E	3.12446	7.45986	Dwil\GK12185	dwil_scf2_1100000004902	0.33207	1.31018
CG9317	st2	2L	FBgn0032879	0.0111105	1.37944	Dsim\GD21684	Scf_2L	3.82803	5.32087	Dsec\GM23312	scaffold_18	5.90373	5.52609	CG9317-PA	2L	14.3524	14.7417	Dyak\GE13547	2R	4.9847	9.26015	Dyak\GE13547	2R	0	2.40332	Dere\GG21553	scaffold_4845	0.039238	3.73564	Dana\GF14551	scaffold_12916	0.0159237	2.26215	Dpse\GA21695	4_group3	16.2688	19.9265					FBpp0280726-D1_1	Muller-B	0.00424852	8.7566	Dwil\GK15053	dwil_scf2_1100000004521	0.00251267	0.271512
CG17544	st2	2L	FBgn0032775	10.1093	0.172608	Dsim\GD21764	Scf_2L	0.251169	0.25374	Dsec\GM17014	scaffold_7	11.2031	2.98471	CG17544-PA	2L	0.106264	0.143266	Dyak\GE12655	2R	0	0.154598	Dyak\GE12655	2R	0.0170381	0.0178309	Dere\GG21636	scaffold_4845	0.0321711	0.176938	Dana\GF15197	scaffold_12916	0	8.64388	Dpse\GA14550	4_group4	0.188125	6.6101	Dper\GL21109	dper_scaffold_16	3.04073e-201	3.97013	FBpp0288004-D1_1	Muller-B	0.136553	19.6412	Dwil\GK23839	dwil_scf2_1100000004516	0.0994989	69.6525
CG9961	st5	2L	FBgn0031451	0.353907	4.04558	Dsim\GD22811	Scf_2L	1.47409	2.45908	Dsec\GM18206	scaffold_5	0.0433023	1.34627	CG9961-PA	2L	0.165148	3.81786	Dyak\GE15053	2L	0.0351722	0.0652265	Dyak\GE15053	2L	0.0146871	0.102911	Dere\GG24499	scaffold_4929	0.131366	0.238572	Dana\GF13876	scaffold_12984	0	0.360044	Dpse\GA22152	4_group4	0.0237036	0.0426986	Dper\GL26450	dper_scaffold_10	1.65289	1.0579	FBpp0287542-D1_1	Muller-B	0.712392	1.86695	Dwil\GK24483	dwil_scf2_1100000004585	0.0380486	0.765613
Kul	st2	3R	FBgn0039688	0.10639	0.582677	Dsim\GD21457	Scf_3R	0.0325121	0.200014					Kul-PA	3R	0.195523	0.455805	Dyak\GE23876	3R	0.16938	2.29105	Dyak\GE23876	3R	0.0601391	0.381097	Dere\GG11687	scaffold_4820	0.010491	0.155072	Dana\GF23367	scaffold_12911	0.0489482	7.64529	Dpse\GA15157	2	0.0117624	0.916163					FBpp0293329-D1_1	Muller-E	0.0110521	0.303873	Dwil\GK11917	dwil_scf2_1100000004902	0.154375	0.0629843
CG3700	st2	2R	FBgn0034796	1.40588	7.88705	Dsim\GD11722	Scf_2R	0.322583	12.8328	Dsec\GM15970	scaffold_9	3.65401e-147	4.19274	CG3700-PA	2R	6.90165	35.389	Dyak\GE14247	2R	7.86593e-107	1.02882e-28	Dyak\GE14247	2R	2.81657e-27	7.37551	Dere\GG22813	scaffold_4845	9.06745e-06	4.08911e-09	Dana\GF13554	scaffold_13266	0	0.131431	Dpse\GA17623	3	0	0.860127	Dper\GL10135	dper_scaffold_31	0	3.72391					Dwil\GK20792	dwil_scf2_1100000004510	0.00367004	0.0372743
CG5618	st5	3L	FBgn0036975	0.0071137	0.251423	Dsim\GD14877	Scf_3L	0.0131472	0.56304	Dsec\GM22279	scaffold_11	0.0718299	2.03249	CG5618-PA	3L	0.174226	3.35858									Dere\GG16103	scaffold_4784	0.0443572	1.33138	Dana\GF10330	scaffold_13337	0.268473	0.0490576	Dpse\GA19009	XR_group6	0	0.968355	Dper\GL25133	dper_scaffold_9	0.00260054	0.387195	FBpp0274955-D1_1	Muller-AD	0.0151533	1.1087	Dwil\GK16953	dwil_scf2_1100000004511	0	0.767494
GstO3	st2	3L	FBgn0035904	0.936124	0.428501	Dsim\GD14099	Scf_3L	0.0437791	0	Dsec\GM25061	scaffold_0	23.7977	2.73079	CG6776-PA	3L	1.22648	0.643792	Dyak\GE20748	3L	10.7239	38.2726	Dyak\GE20748	3L	0.536254	2.19101	Dere\GG14320	scaffold_4784	0	3.43646e-06	Dana\GF24330	scaffold_13337	0.0537528	0.341433	Dpse\GA23844	XR_group6	3.58158	9.91022	Dper\GL15503	dper_scaffold_35	0.507611	3.85249					Dwil\GK20354	dwil_scf2_1100000004768	0.338257	0.629402
CG11275	st2	2R	FBgn0034706	0.283448	3.66203	Dsim\GD15448	Scf_2R	0.286438	1.11167	Dsec\GM15891	scaffold_9	0.773694	2.97144	CG11275-PA	2R	0.830124	4.74624	Dyak\GE14163	2R	0	2.57034	Dyak\GE14163	2R	0.0309786	3.07462	Dere\GG22171	scaffold_4845	0.0107294	5.11726	Dana\GF11653	scaffold_13266	0.471959	2.49245	Dpse\GA10882	3	0.302887	0.621229	Dper\GL11783	dper_scaffold_37	6.41743	3.35072	FBpp0275747-D1_1	Muller-C	0.933924	0.250442	Dwil\GK19642	dwil_scf2_1100000004512	0.575025	3.42627
CG3829	st2	2R	FBgn0035091	0.0436395	0.299579	Dsim\GD11915	Scf_2R	0.327251	0.160599	Dsec\GM11919	scaffold_23	2.98266	0.303822	CG3829-PA	2R	0.740646	0.234677	Dyak\GE14460	2R	0.0169075	1.75028	Dyak\GE14460	2R	0	2.29963	Dere\GG23026	scaffold_4845	0	1.39864	Dana\GF13357	scaffold_13266	0.0089304	1.08958	Dpse\GA17715	3	0.0217925	1.44752	Dper\GL11204	dper_scaffold_2	0.00184959	0.877311	FBpp0277383-D1_1	Muller-C	0.108999	0.106083	Dwil\GK19647	dwil_scf2_1100000004512	0.0645697	0.133466
CG7166	st5	3L	FBgn0037107	0.00379821	0.746038	Dsim\GD12101	Scf_3L	0	0.0276497	Dsec\GM22123	scaffold_11	0	0.414473	CG7166-PB	3L	0	0.125706	Dyak\GE22308	3L	0	0.284126	Dyak\GE22308	3L	0	0.0256049	Dere\GG13217	scaffold_4784	0	0.320925	Dana\GF10697	scaffold_13337	0	0	Dpse\GA20149	XR_group8	0.0852067	0.445099					FBpp0286572-D1_1	Muller-AD	0.0566926	1.20434	Dwil\GK20301	dwil_scf2_1100000004540	0	0.0827182
Cyp301a1	st2	2R	FBgn0033753	0.0102714	0.2854	Dsim\GD10900	Scf_2R	0	0.0180992	Dsec\GM21403	scaffold_1	0.00856752	0.689173	Cyp301a1-PA	2R	0	0.320493	Dyak\GE12475	2R	0	0.612171	Dyak\GE12475	2R	0.356585	0.763013	Dere\GG20316	scaffold_4845	0.00769563	0.134171	Dana\GF13394	scaffold_13266	0	0.0433561	Dpse\GA21183	3	0	0.245646	Dper\GL21304	dper_scaffold_99	0.00496676	0.960233	FBpp0276224-D1_1	Muller-C	0.065951	0.33693	Dwil\GK23301	dwil_scf2_1100000004954	0.0439359	0.0591447
CG11796	st2	3L	FBgn0036992	0.326824	5.06975	Dsim\GD12185	Scf_3L	0.15459	0.940058	Dsec\GM22213	scaffold_11	0.0706039	1.63917	CG11796-PA	3L	0.0357706	4.76418	Dyak\GE22742	v2_chr3L_random_233	14.8088	10.7203	Dyak\GE22742	v2_chr3L_random_233	11.0325	4.02951	Dere\GG13309	scaffold_4784	0.0436415	1.85474	Dana\GF24132	scaffold_13337	0.191707	2.40449	Dpse\GA11203	XR_group8	0.0574812	0.0459679	Dper\GL12777	dper_scaffold_40	0.0244994	0.0919745	FBpp0286060-D1_1	Muller-AD	1.22322	0.0637982	Dwil\GK12342	dwil_scf2_1100000004830	0.0699305	0.38588
CG15117	st5	2R	FBgn0034417	0.178143	0.0315119	Dsim\GD25338	Scf_2R	0.227642	0.106337	Dsec\GM19850	scaffold_1	0.158714	0	CG15117-PB	2R	0.128852	0	Dyak\GE13860	2R	6.70036	0.0108529	Dyak\GE13860	2R	0.882571	0.0196445	Dere\GG20922	scaffold_4845	0.252825	0.0492614	Dana\GF11492	scaffold_13266	2.06292	1.33864	Dpse\GA13505	3	7.06279	2.58442	Dper\GL11760	dper_scaffold_37	11.255	1.01422	FBpp0275723-D1_1	Muller-C	11.84	2.82691	Dwil\GK17841	dwil_scf2_1100000004822	1.9321	0.0568377
CG32137	st5	3L	FBgn0052137	0.0237374	0.47305	Dsim\GD14464	Scf_3L	0.0094094	0.0917298	Dsec\GM25437	scaffold_0	0.0399055	0.111877	CG32137-PB	3L	0	0.0906006	Dyak\GE21987	3L	0.00814252	0.0619584	Dyak\GE21987	3L	0.0169586	5.41003	Dere\GG15658	scaffold_4784	0.0254498	0.00863667	Dana\GF24050	scaffold_13337	0.055582	0	Dpse\GA16705	XR_group6	0.0362731	0.496366	Dper\GL15717	dper_scaffold_47	0.58436	0.215707					Dwil\GK10428	dwil_scf2_1100000004762	0.0515768	0.0703423
Obp46a	st5	2R	FBgn0033508	0.064199	0.12176	Dsim\Obp46a	Scf_2R	0.0786333	0.423907	Dsec\Obp46a	scaffold_1	0	0.19238	Obp46a-PA	2R	0	0.419611	Dyak\Obp46a	2L	0.12618	0.228233	Dyak\Obp46a	2L	0	0.846853	Dere\Obp46a	scaffold_4929	0.0240446	0.767537					Dpse\Obp46a	3	4.01259	11.8448	Dper\Obp46a	dper_scaffold_2	0.00747451	0.119627	FBpp0277812-D1_1	Muller-C	0.00891629	0.0766288	Dwil\Obp46a	dwil_scf2_1100000004822	0.0236055	0.0447621
l(3)neo38	st2	3R	FBgn0265276	0.156519	226.089	Dsim\GD20637	Scf_3R	0.123631	180.653	Dsec\GM26073	scaffold_0	1.15126	176.098	l(3)neo38-PB	3R	0.163891	216.474	Dyak\GE10087	3R	0.297013	253.873	Dyak\GE10087	3R	0.140963	253.485	Dere\GG17195	scaffold_4770	0.198755	243.221	Dana\GF16617	scaffold_13340	0.0864599	228.256	Dpse\GA19962	2	0.418303	365.103	Dper\GL12249	dper_scaffold_6	0.105648	496.515	FBpp0284677-D1_1	Muller-E	0.452751	144.229	Dwil\GK11983	dwil_scf2_1100000004902	1.2003	146.965
Mks1	st5	X	FBgn0030395	0.0230599	0.057331	Dsim\GD15930	Scf_X	8.82515	0.0792168	Dsec\GM11550	scaffold_21	14.5593	0.543122					Dyak\GE16213	X	6.59805	0.592749	Dyak\GE16213	X	1.06575	0.0181948	Dere\GG19551	scaffold_4690	3.04597	0.0670781	Dana\GF22238	scaffold_12929	0	0.0167989	Dpse\GA13919	XL_group1a	0.011975	0.698082	Dper\GL25370	dper_scaffold_12	0.153568	0.293666	FBpp0272975-D1_1	Muller-AD	0.00671194	0.144853	Dwil\GK16128	dwil_scf2_1100000004590	0	0.0522022
Phk-3	st5	2R	FBgn0035089	0.0228425	0.919366	Dsim\GD24902	Scf_2R	0.245269	0.329431	Dsec\GM11771	scaffold_23	0.124144	1.20762	Phk-3-PA	2R	0.0796934	1.96843	Dyak\Phk-3	2R	0.287702	1.09159	Dyak\Phk-3	2R	0	0.903015	Dere\GG19868	scaffold_4845	0	4.54375	Dana\GF11516	scaffold_13266	0.23649	0.814843	Dpse\GA21727	3	0	0.155995	Dper\GL10889	dper_scaffold_2	0.0294461	0.768279					Dwil\GK19506	dwil_scf2_1100000004512	0.668648	0.389579
a	st5	2R	FBgn0000008	8.10964	0.341922					Dsec\GM15888	scaffold_9	8.03898	0.62731	a-PB	2R	9.89161	0.753109	Dyak\GE14160	2R	14.1669	0.250384	Dyak\GE14160	2R	14.2323	0.21414	Dere\GG22167	scaffold_4845	9.26321	1.08239	Dana\GF11650	scaffold_13266	1.94339	0.0610107	Dpse\GA19824	3	5.23802	0.338001	Dper\GL11782	dper_scaffold_37	10.0342	0.617296	FBpp0275745-D1_1	Muller-C	0.361745	0.19596	Dwil\GK19638	dwil_scf2_1100000004512	2.7043	0.523729
beat-Ia	st5	2L	FBgn0013433	9.84306	0.0705682	Dsim\GD24038	Scf_2L	0	0	Dsec\GM18652	scaffold_5	0	0.490632	beat-Ia-PA	2L	0	0	Dyak\GE21310	2L	0	0.123959	Dyak\GE21310	2L	0.0146735	0	Dere\GG25189	scaffold_4929	0.00878818	12.3277	Dana\GF14936	scaffold_12916	0	0.0306774	Dpse\GA18474	4_group4	0	0.658342	Dper\GL21040	dper_scaffold_16	0.00226034	1.58801	FBpp0287938-D1_1	Muller-B	0	0.108107	Dwil\GK18108	dwil_scf2_1100000004577	0	0.455777
CG6040	st2	3R	FBgn0038679	0.0228438	0.0358657	Dsim\GD19271	Scf_3R	0.00200649	0.0205507	Dsec\GM26822	scaffold_25	0.0328864	0.0161771	CG6040-PA	3R	0.00759345	0.0226833	Dyak\GE25582	3R	0.0168587	0.161945	Dyak\GE25582	3R	0.00688627	0.0774862	Dere\GG23139	scaffold_4770	0.187647	0.308469	Dana\GF16048	scaffold_13340	0	0.287981	Dpse\GA19313	2	0	0.720771	Dper\GL23819	dper_scaffold_0	0.00117291	1.12759	FBpp0283514-D1_1	Muller-E	0	0.369642	Dwil\GK12840	dwil_scf2_1100000004943	0.00775319	0.0502565
CG6040	st5	3R	FBgn0038679	0.0228438	0.0358657	Dsim\GD19271	Scf_3R	0.00200649	0.0205507	Dsec\GM26822	scaffold_25	0.0328864	0.0161771	CG6040-PA	3R	0.00759345	0.0226833	Dyak\GE25582	3R	0.0168587	0.161945	Dyak\GE25582	3R	0.00688627	0.0774862	Dere\GG23139	scaffold_4770	0.187647	0.308469	Dana\GF16048	scaffold_13340	0	0.287981	Dpse\GA19313	2	0	0.720771	Dper\GL23819	dper_scaffold_0	0.00117291	1.12759	FBpp0283514-D1_1	Muller-E	0	0.369642	Dwil\GK12840	dwil_scf2_1100000004943	0.00775319	0.0502565
CG9674	st5	3L	FBgn0036663	4.55693	2.28495	Dsim\GD12441	Scf_3L	5.96929	0.400375	Dsec\GM24365	scaffold_0	10.0785	2.69294	CG9674-PA	3L	6.40989	0.586838	Dyak\GE22188	3L	3.59272	1.84794	Dyak\GE22188	3L	2.42639	0.489999	Dere\GG15849	scaffold_4784	5.82845	1.86427	Dana\GF10502	scaffold_13337	3.76452	0.295502	Dpse\GA21956	XR_group8	6.34866	1.57498	Dper\GL16188	dper_scaffold_32	15.2618	0.84077	FBpp0286543-D1_1	Muller-AD	8.33699	0.385556	Dwil\GK12671	dwil_scf2_1100000004729	10.2457	0.731757
CG31075	st5	3R	FBgn0051075	5.81606	0.0180155	Dsim\GD18107	Scf_3R	22.0372	0.0390778	Dsec\GM10152	scaffold_13	5.70951	0.989726	CG31075-PA	3R	7.76549	0	Dyak\GE10603	3R	18.8236	0.0271915	Dyak\GE10603	3R	6.81383	0.137014	Dere\GG12158	scaffold_4820	20.7776	0.12865	Dana\GF22966	scaffold_12911	38.8884	0.485769					Dper\GL23630	dper_scaffold_0	16.8154	0.580126					Dwil\GK12053	dwil_scf2_1100000004902	22.4158	0.663275
Teh3	st5	3L	FBgn0040697	0.013188	1.99628	Dsim\GD13284	Scf_3L	0.0381459	0.441469	Dsec\GM14004	scaffold_2	0.0895339	0.928599	Teh3-PA	3L	0.127227	2.34189	Dyak\GE20640	3L	0.0523798	0.239087	Dyak\GE20640	3L	0.041257	0.72199	Dere\GG14212	scaffold_4784	0	0.860603	Dana\GF23880	scaffold_13337	0.0132724	0.0632236	Dpse\GA15048	XR_group8	0.0691136	0.327231	Dper\GL12732	dper_scaffold_40	1.7025	7.1596					Dwil\GK10258	dwil_scf2_1100000004762	0.0280993	0.400811
CG6231	st2	3R	FBgn0038720	0.009622	0.149487	Dsim\GD20109	Scf_3R	0	0.211385	Dsec\GM26901	scaffold_25	0	0.281366	CG6231-PC	3R	0.0388574	0.24659									Dere\GG15919	scaffold_4770	0	0.35671	Dana\GF18456	scaffold_13340	0.153106	0.924636	Dpse\GA26145	2	0.0911845	1.40322	Dper\GL11958	dper_scaffold_6	0.0025312	0.646316					Dwil\GK12072	dwil_scf2_1100000004902	0.0303528	0.418856
CG6231	st5	3R	FBgn0038720	0.009622	0.149487	Dsim\GD20109	Scf_3R	0	0.211385	Dsec\GM26901	scaffold_25	0	0.281366	CG6231-PC	3R	0.0388574	0.24659									Dere\GG15919	scaffold_4770	0	0.35671	Dana\GF18456	scaffold_13340	0.153106	0.924636	Dpse\GA26145	2	0.0911845	1.40322	Dper\GL11958	dper_scaffold_6	0.0025312	0.646316					Dwil\GK12072	dwil_scf2_1100000004902	0.0303528	0.418856
CG12947	st2	3R	FBgn0037753	0.19351	7.98793					Dsec\GM23840	scaffold_0	0.39042	5.10723	CG12947-PC	3R	233.032	829.255	Dyak\GE25989	3R	0.0310407	0.374171	Dyak\GE25989	3R	0.0552347	0.663367	Dere\GG17158	scaffold_4770	0.153716	1.87662	Dana\GF17841	scaffold_13340	0.218522	0.115731	Dpse\GA11930	2	0.00774088	0.15723	Dper\GL24307	dper_scaffold_0	3.31583e-144	1.88883e-61	FBpp0297461-D1_1	Muller-E	0.0250332	0.319807	Dwil\GK11968	dwil_scf2_1100000004902	0.03921	0.331189
CG9664	st5	2L	FBgn0031515	0	0.21527	Dsim\GD22767	Scf_2L	0	0.22922	Dsec\GM18156	scaffold_5	0	0.3838	CG9664-PB	2L	0	2.36725	Dyak\GE14913	2L	0.0174673	0.0547217	Dyak\GE14913	2L	0.00938397	0.740276	Dere\GG24450	scaffold_4929	0	0.839506	Dana\GF15690	scaffold_12916	0	0.0211632	Dpse\GA28852	4_group4	0.0170516	0.580176	Dper\GL26410	dper_scaffold_10	0.0248826	0.946711	FBpp0287501-D1_1	Muller-B	0.00605644	0.482236	Dwil\GK18117	dwil_scf2_1100000004577	0	0.0286205
Hsc70-2	st5	3R	FBgn0001217	0.0535463	9.50055	Dsim\GD18878	Scf_3R	0.0103843	0.0995629	Dsec\GM24082	scaffold_0	0.117855	0.65601	Hsc70-2-PA	3R	0.573089	1.02702	Dyak\GE26242	3R	0.00264509	0.0506141	Dyak\GE26242	3R	0.0100534	0.0179904	Dere\GG19412	scaffold_4770	0	0.0450042	Dana\GF17572	scaffold_13340	0.0223304	0.0570954	Dpse\GA20564	2	0	0.163235									Dwil\GK12230	dwil_scf2_1100000004902	0	0.0498663
pwn	st5	2R	FBgn0003174	0.0104941	0.166697	Dsim\GD10469	Scf_2R	0	0.0453974	Dsec\GM20944	scaffold_1	0.00880009	0.0953997	pwn-PA	2R	0.00510084	0.0577134	Dyak\GE19119	2L	0	0.420083	Dyak\GE19119	2L	0	0.0893351	Dere\GG23271	scaffold_4929	0	0.0878251	Dana\GF12705	scaffold_13266	0	0.00894979	Dpse\GA10760	3	4.5583	0.177513	Dper\GL11160	dper_scaffold_2	12.8144	0.659536	FBpp0277340-D1_1	Muller-C	2.81404	1.40958	Dwil\GK21799	dwil_scf2_1100000004513	0.00243414	0.449273
CG10262	st2	2L	FBgn0032813	0.0858269	0.0698932	Dsim\GD21742	Scf_2L	0.361129	4.34052	Dsec\GM16995	scaffold_7	0.0733565	0.486777	CG10262-PA	2L	0.202396	1.08774	Dyak\GE12637	2R	0.0373494	60.299	Dyak\GE12637	2R	0.0755291	17.112	Dere\GG21617	scaffold_4845	0.811499	39.3551	Dana\GF15480	scaffold_12916	0.0260366	0.592257	Dpse\GA10201	4_group1	0.405427	1.5234	Dper\GL26136	dper_scaffold_5	1.743e-51	5.11847e-47					Dwil\GK15224	dwil_scf2_1100000004521	0.848147	1.12539
Mmp1	st2	2R	FBgn0035049	0.00559294	0.415179	Dsim\GD24926	Scf_2R	0.0258441	1.43041	Dsec\GM11800	scaffold_23	0	0.0270036	Mmp1-PC	2R	0	0.118858	Dyak\GE11424	2R	0	0.0276666	Dyak\GE11424	2R	0	0.0212258	Dere\GG19900	scaffold_4845	0	0	Dana\GF11910	scaffold_13266	0	0.790516	Dpse\GA18484	3	0	0.0316679	Dper\GL17167	dper_scaffold_4	0.0064577	0.0427363	FBpp0306119-D1_1	Muller-C	0.00594536	0.0579026	Dwil\GK21871	dwil_scf2_1100000004513	0.0788922	0.247838
Mmp1	st5	2R	FBgn0035049	0.00559294	0.415179	Dsim\GD24926	Scf_2R	0.0258441	1.43041	Dsec\GM11800	scaffold_23	0	0.0270036	Mmp1-PC	2R	0	0.118858	Dyak\GE11424	2R	0	0.0276666	Dyak\GE11424	2R	0	0.0212258	Dere\GG19900	scaffold_4845	0	0	Dana\GF11910	scaffold_13266	0	0.790516	Dpse\GA18484	3	0	0.0316679	Dper\GL17167	dper_scaffold_4	0.0064577	0.0427363	FBpp0306119-D1_1	Muller-C	0.00594536	0.0579026	Dwil\GK21871	dwil_scf2_1100000004513	0.0788922	0.247838
Klp54D	st5	2R	FBgn0263076	0.0213354	0.247864	Dsim\GD11290	Scf_2R	0.0715742	0.0114848	Dsec\GM21800	scaffold_1	0.108713	0.33422	Klp54D-PA	2R	0.71334	1.57447	Dyak\GE11873	2R	0.0910066	0.253462	Dyak\GE11873	2R	1.33445	0.262902	Dere\GG21798	scaffold_4845	0.394928	1.12313	Dana\GF11642	scaffold_13266	0.0260357	0.162669	Dpse\GA24738	3	0.307641	0.0301414	Dper\GL11466	dper_scaffold_2	9.57037	7.37798	FBpp0277666-D1_1	Muller-C	0.00301043	0.119286	Dwil\GK21901	dwil_scf2_1100000004513	0.0286233	0.251354
Nep2	st5	3R	FBgn0027570	0.0364948	0.173587	Dsim\GD19662	Scf_3R	0.41585	1.75883	Dsec\GM10687	scaffold_6	0.012388	0.383793	Nep2-PB	3R	0.00969918	0.223044	Dyak\GE25338	3R	0.53588	0.115593	Dyak\GE25338	3R	0.0143645	0.0170368	Dere\GG11422	scaffold_4770	0.208202	0.0776846	Dana\GF16094	scaffold_13340	0	0	Dpse\GA22015	2	0	0.0522175	Dper\GL21487	dper_scaffold_3	0.00157119	0.0226859	FBpp0301642-D1_1	Muller-E	0.00305474	0.0237508	Dwil\GK14429	dwil_scf2_1100000004943	0.00314207	0.0870223
CG7985	st2	3R	FBgn0028499	5.5918	3.48758	Dsim\GD19213	Scf_3R	1.03581	1.02714	Dsec\GM15285	scaffold_12	18.9016	3.80677	CG7985-PA	3R	2.76966	1.79103	Dyak\GE25519	3R	1.09579	1.18211	Dyak\GE25519	3R	2.57755	0.788521	Dere\GG22715	scaffold_4770	0.563276	1.1528	Dana\GF18511	scaffold_13340	0.673725	0.608401	Dpse\GA20741	2	0.554347	2.90402	Dper\GL12597	dper_scaffold_6	0.400895	0.637485	FBpp0284895-D1_1	Muller-E	1.31889	0.867613	Dwil\GK11247	dwil_scf2_1100000004902	0.03466	0.0408455
CG7985	st5	3R	FBgn0028499	5.5918	3.48758	Dsim\GD19213	Scf_3R	1.03581	1.02714	Dsec\GM15285	scaffold_12	18.9016	3.80677	CG7985-PA	3R	2.76966	1.79103	Dyak\GE25519	3R	1.09579	1.18211	Dyak\GE25519	3R	2.57755	0.788521	Dere\GG22715	scaffold_4770	0.563276	1.1528	Dana\GF18511	scaffold_13340	0.673725	0.608401	Dpse\GA20741	2	0.554347	2.90402	Dper\GL12597	dper_scaffold_6	0.400895	0.637485	FBpp0284895-D1_1	Muller-E	1.31889	0.867613	Dwil\GK11247	dwil_scf2_1100000004902	0.03466	0.0408455
nht	st5	2L	FBgn0041103	0	0.357714	Dsim\GD21960	Scf_2L	0	0.474574	Dsec\GM14423	scaffold_3	0	0.735927	nht-PB	2L	0	0.127164	Dyak\GE19406	2L	0	0.0846112	Dyak\GE19406	2L	0	0.214781	Dere\GG24213	scaffold_4929	0	0.582895	Dana\GF14528	scaffold_12916	0	0.235802	Dpse\GA13609	4_group4	0	0.67399	Dper\GL26596	dper_scaffold_10	0	0.87272	FBpp0287797-D2_1	Muller-B	0	0.294265	Dwil\GK18909	dwil_scf2_1100000004577	0	0.288098
CG4198	st2	X	FBgn0029753	1.02171	0.294014					Dsec\GM12399	scaffold_4	0.23723	0.0717678					Dyak\GE16392	X	349.241	0.875006	Dyak\GE16392	X	0.542238	0.325248	Dere\GG18751	scaffold_4690	1.6557	0.658952	Dana\GF21335	scaffold_13117	0.0272127	0	Dpse\GA18022	XL_group1a	0.0687208	0.198853	Dper\GL14289	dper_scaffold_11	68.3474	2.83922	FBpp0272943-D1_1	Muller-AD	0.454023	0.660335	Dwil\GK18541	dwil_scf2_1100000004963	0.34469	0.835608
ush	st2	2L	FBgn0003963	2.00647	38.3642	Dsim\GD23030	Scf_2L	3.41341	32.3763	Dsec\GM16748	scaffold_14	9.25596	26.9615					Dyak\GE16880	2L	2.97269	29.0721	Dyak\GE16880	2L	4.84734	75.1367	Dere\GG24725	scaffold_4929	0.8089	59.307	Dana\GF20666	scaffold_12943	0.030724	24.5722	Dpse\GA15455	4_group3	0.657165	24.6236	Dper\GL18881	dper_scaffold_1	1.20614	61.6776	FBpp0280197-D1_1	Muller-B	1.46704	21.2289	Dwil\GK24402	dwil_scf2_1100000004585	0.0432086	77.0502
CG15130	st5	2L	FBgn0032860	0	0.182206					Dsec\GM23326	scaffold_18	0.0933687	0	CG15130-PA	2L	0	0.160287	Dyak\GE12592	2R	0.0614068	0.097248	Dyak\GE12592	2R	0	1.24061	Dere\GG21571	scaffold_4845	0	0	Dana\GF14775	scaffold_12916	0.0675026	0.485005	Dpse\GA13518	4_group4	0.0841241	0.21699	Dper\GL26412	dper_scaffold_10	1.09602	1.20602	FBpp0287504-D1_1	Muller-B	0.247554	0.523595	Dwil\GK18121	dwil_scf2_1100000004577	0	0.0398939
CG18869	st5	3L	FBgn0042179	0.00479969	0.118805	Dsim\GD13807	Scf_3L	0	2.68071	Dsec\GM14618	scaffold_2	0	0.503517	CG18869-PA	3L	0.0226702	1.64118	Dyak\GE21406	3L	0	0	Dyak\GE21406	3L	0	0	Dere\GG15187	scaffold_4784	0	0.264918	Dana\GF10094	scaffold_13337	0	0.281928	Dpse\GA15106	XR_group6	0	0.0612641	Dper\GL17052	dper_scaffold_82	0	0.0169751	FBpp0274366-D1_1	Muller-AD	0	0	Dwil\GK17775	dwil_scf2_1100000004822	0	0.627647
CG5644	st5	3L	FBgn0035948	0.00549076	0.678173	Dsim\GD12950	Scf_3L	0	0.208023	Dsec\GM24900	scaffold_0	0	0.603616	CG5644-PA	3L	0.0147373	0.896372	Dyak\GE21270	3L	0	1.87836	Dyak\GE21270	3L	0	0.0568509	Dere\GG15046	scaffold_4784	0	0.971083	Dana\GF10136	scaffold_13337	0	0.0595905	Dpse\GA19027	XR_group5	0.0131379	0.032986	Dper\GL15044	dper_scaffold_67	0	0.0279337	FBpp0288334-D1_1	Muller-AD	0.00362428	0.178956	Dwil\GK12285	dwil_scf2_1100000004830	0.00721676	0.157432
Mmp2	st5	2R	FBgn0033438	0.655672	0.115013	Dsim\GD10058	Scf_2R	0.0113361	0.0805262	Dsec\GM20587	scaffold_1	0.0385853	0.0800048	Mmp2-PB	2R	0	0.0431067	Dyak\GE22137	2L	0.0100309	0.310236	Dyak\GE22137	2L	0.107011	5.28187	Dere\GG25269	scaffold_4929	0	0.0812551	Dana\GF11488	scaffold_13266	0.0308696	0.0319969	Dpse\GA24215	3	0.00297441	0.0649654	Dper\GL17329	dper_scaffold_4	0.00340763	0.301884	FBpp0307322-D1_1	Muller-C	0.00329009	0.129203	Dwil\GK15621	dwil_scf2_1100000004514	0.180982	0.134613
CG31100	st5	3R	FBgn0051100	0.00803219	0.0246154	Dsim\GD20830	Scf_3R	0.0849237	0.350441	Dsec\GM26293	scaffold_0	0	0	CG31100-PA	3R	66.907	34.5382	Dyak\GE24807	3R	0	0.0175795	Dyak\GE24807	3R	0	0	Dere\GG17404	scaffold_4770	0	0.00891828	Dana\GF18437	scaffold_13340	0	0.254915	Dpse\GA16009	2	0.0491217	0.34019	Dper\GL12498	dper_scaffold_6	0	0.147297	FBpp0284794-D1_1	Muller-E	0	1.39512	Dwil\GK11425	dwil_scf2_1100000004902	0.00309318	0.0360864
CG33143	st5	2R	FBgn0053143	0.00204572	0.61626	Dsim\GD11681	Scf_2R	0.00456058	0.0490641									Dyak\GE14001	2R	0	0.0338728	Dyak\GE14001	2R	0.00811331	0.0191641	Dere\GG21059	scaffold_4845	3.73501	0.791494	Dana\GF11905	scaffold_13266	0	0.316503	Dpse\GA24781	3	0.00251411	0.833574	Dper\GL11591	dper_scaffold_2	0.0159285	0.0977528	FBpp0277799-D1_1	Muller-C	0.137301	1.32949	Dwil\GK17898	dwil_scf2_1100000004822	0.00146278	0.00351592
Pde11	st5	2L	FBgn0085370	17.9738	2.27906	Dsim\GD21829	Scf_2L	20.1534	1.88933	Dsec\GM17084	scaffold_7	34.3486	4.10676	Pde11-PB	2L	25.6633	2.96701	Dyak\GE12727	2R	25.7426	0.543164	Dyak\GE12727	2R	44.7573	3.54609					Dana\GF14841	scaffold_12916	16.0873	0.28706	Dpse\GA25777	4_group3	24.4613	0.510193	Dper\GL18744	dper_scaffold_1	31.7842	0.734423	FBpp0280052-D1_1	Muller-B	36.4194	0.634488	Dwil\GK24656	dwil_scf2_1100000004585	23.0084	0.67614
pk	st5	2R	FBgn0003090	0.0535791	0.0338032	Dsim\GD10467	Scf_2R	0.0703679	0	Dsec\GM20940	scaffold_1	0.238594	0.0124851	pk-PC	2R	0.0264341	0.0401016	Dyak\GE19116	2L	0.525269	0.247509	Dyak\GE19116	2L	0.220579	0.0414083	Dere\GG23268	scaffold_4929	0.00469978	0.705002	Dana\GF12702	scaffold_13266	0.00858143	0.011233	Dpse\GA10748	3	0	0.282105	Dper\GL11157	dper_scaffold_2	0.00219665	0.476197	FBpp0277336-D1_1	Muller-C	0.00160273	0.329523	Dwil\GK21795	dwil_scf2_1100000004513	0.00157446	0.079238
CG13085	st5	2L	FBgn0032780	1.20921	3.85733	Dsim\GD24204	Scf_2L	0.808121	2.45206	Dsec\GM17345	scaffold_7	1.15102	0	CG13085-PA	2L	0.259618	0	Dyak\GE13252	2R	0	0	Dyak\GE13252	2R	0.882812	0.169356	Dere\GG21179	scaffold_4845	0.0564331	0.498747	Dana\GF19685	scaffold_12916	0.0796434	0.0571697	Dpse\GA12035	4_group4	1.84774	1.23035	Dper\GL21207	dper_scaffold_16	1.45482	0.943674	FBpp0287296-D1_1	Muller-B	3.86337	6.33523	Dwil\GK19080	dwil_scf2_1100000004516	0.15362	0.233064
vir-1	st2	2L	FBgn0043841	4.87436	3.47618	Dsim\GD22123	Scf_2L	0.698853	0.632728	Dsec\GM26251	scaffold_16	0.0593348	0.352409	vir-1-PA	2L	0.163002	0.426326	Dyak\GE12315	2L	0	0.131392	Dyak\GE12315	2L	0	0.0285847	Dere\GG10265	scaffold_4929	24.532	15.3745	Dana\GF15675	scaffold_12916	0	0	Dpse\GA16459	4_group3	0.645071	2.23907	Dper\GL19505	dper_scaffold_1	0.259971	0.800506	FBpp0280632-D1_1	Muller-B	0.260797	0.799219	Dwil\GK14629	dwil_scf2_1100000004521	0	0.0119215
vir-1	st5	2L	FBgn0043841	4.87436	3.47618	Dsim\GD22123	Scf_2L	0.698853	0.632728	Dsec\GM26251	scaffold_16	0.0593348	0.352409	vir-1-PA	2L	0.163002	0.426326	Dyak\GE12315	2L	0	0.131392	Dyak\GE12315	2L	0	0.0285847	Dere\GG10265	scaffold_4929	24.532	15.3745	Dana\GF15675	scaffold_12916	0	0	Dpse\GA16459	4_group3	0.645071	2.23907	Dper\GL19505	dper_scaffold_1	0.259971	0.800506	FBpp0280632-D1_1	Muller-B	0.260797	0.799219	Dwil\GK14629	dwil_scf2_1100000004521	0	0.0119215
unc	st2	X	FBgn0003950	0.283355	2.79184	Dsim\GD15505	Scf_X	0.070072	0.59445	Dsec\GM22638	scaffold_8	0.0431441	1.27727	unc-PA	X	0.153097	1.60053	Dyak\GE15315	X	0	0.505409	Dyak\GE15315	X	0.00802344	0.128644	Dere\GG17554	scaffold_4690	0.0108719	0.54763	Dana\GF21853	scaffold_13334	0	0.028325	Dpse\GA22296	XL_group3a	0.00370461	0.115198	Dper\GL16579	dper_scaffold_15	0.0304201	0.193931	FBpp0272156-D1_1	Muller-A	0	0.340939	Dwil\GK16707	dwil_scf2_1100000004963	0.00102385	0.0500241
unc	st5	X	FBgn0003950	0.283355	2.79184	Dsim\GD15505	Scf_X	0.070072	0.59445	Dsec\GM22638	scaffold_8	0.0431441	1.27727	unc-PA	X	0.153097	1.60053	Dyak\GE15315	X	0	0.505409	Dyak\GE15315	X	0.00802344	0.128644	Dere\GG17554	scaffold_4690	0.0108719	0.54763	Dana\GF21853	scaffold_13334	0	0.028325	Dpse\GA22296	XL_group3a	0.00370461	0.115198	Dper\GL16579	dper_scaffold_15	0.0304201	0.193931	FBpp0272156-D1_1	Muller-A	0	0.340939	Dwil\GK16707	dwil_scf2_1100000004963	0.00102385	0.0500241
CG9413	st2	X	FBgn0030574	0.0111617	0.124799	Dsim\GD15847	Scf_X	0.00897101	0.0595773	Dsec\GM17545	scaffold_20	0	0	CG9413-PB	X	0	0	Dyak\GE16110	X	4.15462	8.48656	Dyak\GE16110	X	0.771524	7.91167	Dere\GG19454	scaffold_4690	0.56223	1.51808	Dana\GF22383	scaffold_13248	0.0103381	0.164869	Dpse\GA21769	XL_group1e	0.0121284	0.0514993	Dper\GL20417	dper_scaffold_17	0.00868544	0.0635319	FBpp0288248-D1_1	Muller-A	0.722981	0.0613234	Dwil\GK18491	dwil_scf2_1100000004963	0	0.105487
CG9413	st5	X	FBgn0030574	0.0111617	0.124799	Dsim\GD15847	Scf_X	0.00897101	0.0595773	Dsec\GM17545	scaffold_20	0	0	CG9413-PB	X	0	0	Dyak\GE16110	X	4.15462	8.48656	Dyak\GE16110	X	0.771524	7.91167	Dere\GG19454	scaffold_4690	0.56223	1.51808	Dana\GF22383	scaffold_13248	0.0103381	0.164869	Dpse\GA21769	XL_group1e	0.0121284	0.0514993	Dper\GL20417	dper_scaffold_17	0.00868544	0.0635319	FBpp0288248-D1_1	Muller-A	0.722981	0.0613234	Dwil\GK18491	dwil_scf2_1100000004963	0	0.105487
Gbs-76A	st5	3L	FBgn0036862	0.0207827	0.782364					Dsec\GM14881	scaffold_19	0.0645073	3.86722	CG9619-PA	3L	0	0.488318									Dere\GG13414	scaffold_4784	0	0.105717	Dana\GF10772	scaffold_13337	0	0.090182	Dpse\GA21917	XR_group8	0.00481062	0.187199	Dper\GL20910	dper_scaffold_48	0.00332934	0.347947	FBpp0286108-D1_1	Muller-AD	0.00271097	0.0351885	Dwil\GK19640	dwil_scf2_1100000004540	0.431715	0.227085
bbg	st5	3L	FBgn0087007	2.4662	32.4694					Dsec\GM24546	scaffold_0	0.199128	0.101115	bbg-PC	3L	3.66378	20.8636	Dyak\GE20020	3L	0.0141259	0.0145455	Dyak\GE20020	3L	0.0949296	0	Dere\GG13725	scaffold_4784	0.105896	0.0159894	Dana\GF25197	scaffold_13337	0	0	Dpse\GA21894	XR_group6	0.0849688	0.0345977	Dper\GL20990	dper_scaffold_41	3.87898	20.5267	FBpp0274340-D1_1	Muller-AD	0.368572	0.058133	Dwil\GK10299	dwil_scf2_1100000004762	0.0297771	0.0294723
wrapper	st5	2R	FBgn0025878	0.00622445	0.0369023	Dsim\GD11663	Scf_2R	0	0.0430677	Dsec\GM15904	scaffold_9	0	0	wrapper-PA	2R	0.0130941	0.0284219	Dyak\GE14178	2R	0	0.0244733	Dyak\GE14178	2R	0	0.0779148	Dere\GG22184	scaffold_4845	0	0.01271	Dana\GF11886	scaffold_13266	0	0	Dpse\GA10289	3	0.0110811	0.0195912	Dper\GL17539	dper_scaffold_4	0	0	FBpp0276070-D1_1	Muller-C	0	0.0405067	Dwil\GK20814	dwil_scf2_1100000004510	0	0.0254806
Lin29	st5	4	FBgn0262636	0.00556434	0.858746	Dsim\GD24383	Scf_ICT25	0.0117454	0.297452	Dsec\GM26782	scaffold_30	0.00458835	0.0783914	Lin29-PA	4	0.0108346	0.305528	Dyak\GE14516	4	0.0028424	0.120509	Dyak\GE14516	4	0	1.02754	Dere\GG16450	scaffold_4512	5.41835	0.744832	Dana\GF23422	scaffold_13034	0.0779531	0.613454	Dpse\GA22510	Unknown_group_1	0.00255204	0.355664	Dper\GL18148	dper_scaffold_42	0.00376811	0.207054	FBpp0272512-D1_1	Muller-F	0	0.252849	Dwil\GK13709	dwil_scf2_1100000004943	0.0737317	0.152627
CG13810	st5	3L	FBgn0035313	0.0247591	0.236092	Dsim\GD13664	Scf_3L	0	0	Dsec\GM14466	scaffold_2	0	0.221848	CG13810-PA	3L	0.481734	1907.05	Dyak\GE21206	3L	0.0171532	0.203414	Dyak\GE21206	3L	0	0.47084	Dere\GG14842	scaffold_4784	0	0.013311	Dana\GF24853	scaffold_13337	0	0	Dpse\GA12546	XR_group6	0	0.563173	Dper\GL24637	dper_scaffold_33	0	1.14413	FBpp0275521-D1_1	Muller-AD	0	0.63154	Dwil\GK12599	dwil_scf2_1100000004729	0	0.0890415
Prestin	st5	3L	FBgn0036770	33.155	0.317859	Dsim\GD12361	Scf_3L	20.9495	0.238556	Dsec\GM24292	scaffold_0	48.0737	2.52812	Prestin-PA	3L	29.1528	0.169114	Dyak\GE22101	3L	38.9046	0.492797	Dyak\GE22101	3L	43.027	1.09368	Dere\GG15768	scaffold_4784	31.9682	2.30287	Dana\GF25225	scaffold_13337	27.0975	0.221471	Dpse\GA18918	XR_group6	15.8965	0.619396	Dper\GL22735	dper_scaffold_20	37.4642	0.832398	FBpp0274114-D1_1	Muller-AD	17.3356	1.32441	Dwil\GK20575	dwil_scf2_1100000004768	22.591	0.193674
grim	st2	3L	FBgn0015946	0	1.62597	Dsim\GD12347	Scf_3L	0	0.957914	Dsec\GM14945	scaffold_19	0	1.70619	grim-PA	3L	0	2.07673	Dyak\GE22078	3L	0	3.88662	Dyak\GE22078	3L	0	1.28756	Dere\GG15746	scaffold_4784	0.0800847	1.05995	Dana\GF10822	scaffold_13337	0	3.35081	Dpse\GA18123	XR_group6	0.0132371	16.8987	Dper\GL22714	dper_scaffold_20	0.00533703	15.8366	FBpp0274094-D1_1	Muller-AD	0.0123424	12.0948	Dwil\GK11571	dwil_scf2_1100000004762	0	0.525391
CG6414	st5	X	FBgn0029690	0.578845	0.156256					Dsec\GM12707	scaffold_4	0.00830058	0	CG6414-PA	X	0.114728	0.0314621	Dyak\GE16876	X	0	0.0277852	Dyak\GE16876	X	0	0.134894	Dere\GG18565	scaffold_4690	0.966674	0.0813249	Dana\GF11016	scaffold_6016	0	0	Dpse\GA19574	XL_group1e	0.0885657	0.119523	Dper\GL14544	dper_scaffold_14	0.202998	0.83999	FBpp0275447-D1_1	Muller-A	0.027911	0.151022	Dwil\GK10360	dwil_scf2_1100000004401	0.0908905	0.161435
CG9010	st5	2R	FBgn0034173	0	0	Dsim\GD25506	Scf_2R	0	0.497715	Dsec\GM20020	scaffold_1	0	0.256206	CG9010-PA	2R	0	0.604688	Dyak\GE14229	2R	0.444722	3.1741	Dyak\GE14229	2R	0	0	Dere\GG22232	scaffold_4845	0	0.227344	Dana\GF13438	scaffold_13266	0	0.0623261	Dpse\GA21475	3	0	0.387916	Dper\GL10495	dper_scaffold_2	0	0.0659407	FBpp0276651-D1_1	Muller-C	0.00724267	0.016655	Dwil\GK21310	dwil_scf2_1100000004513	0.00381724	0.229604
RSG7	st2	X	FBgn0024941	0.00171322	0.696311	Dsim\GD15718	Scf_X	0	0.219652	Dsec\GM13360	scaffold_17	0	0.305195					Dyak\GE15638	X	0	0.0748443	Dyak\GE15638	X	0	0.0199908	Dere\GG18219	scaffold_4690	11.0199	3.78065	Dana\GF21566	scaffold_13301	0.00917875	0.76304	Dpse\GA21548	XL_group3b	0.00927387	3.99884	Dper\GL22811	dper_scaffold_56	2.81642	26.4753	FBpp0285510-D1_1	Muller-AD	0.0019137	1.45634	Dwil\GK25823	dwil_scf2_1100000004909	0.00581428	0.277836
Actbeta	st5	4	FBgn0024913	0.00381539	0.437723					Dsec\GM13010	scaffold_40	0.0106668	1.4843	Actbeta-PA	4	0.0525952	0.242698	Dyak\GE14488	4	0.00617599	0.0611853	Dyak\GE14488	4	0	0.048949	Dere\GG16419	scaffold_4512	7.38341	3.00203	Dana\GF20147	scaffold_12902	0	0	Dpse\GA10734	Unknown_group_58	0	0.0520803					FBpp0285463-D1_1	Muller-F	0.00578789	0.453572	Dwil\GK13706	dwil_scf2_1100000004943	0.0297305	0.289926
mtsh	st5	2L	FBgn0262598	0.0315361	0.077536	Dsim\GD22420	Scf_2L	0.0669544	0.211434	Dsec\GM13056	scaffold_3	38.2418	22.0827	mtsh-PD	2L	0.0217641	0.404478	Dyak\GE11052	2L	0.0743362	0.659749	Dyak\GE11052	2L	0.282545	2.29895	Dere\GG23455	scaffold_4929	0	0.0832951	Dana\GF15264	scaffold_12916	0.00745486	0.0181936	Dpse\GA20593	4_group3	0.0541444	12.7139	Dper\GL19382	dper_scaffold_1	0.00870955	1.20009	FBpp0280505-D1_1	Muller-B	1.05307	1.05935	Dwil\GK24232	dwil_scf2_1100000004585	0.157387	0.0142701
CG13196	st5	2R	FBgn0033645	0	0.264255	Dsim\GD25890	Scf_2R	0.00935551	1.64867	Dsec\GM20414	scaffold_1	0.00818407	3.5361	CG13196-PA	2R	0	2.06074	Dyak\GE13507	2R	0	0.0702471	Dyak\GE13507	2R	0	0.541259	Dere\GG22635	scaffold_4845	0	0.24419	Dana\GF13410	scaffold_13266	0	0.41056	Dpse\GA12111	3	11.5174	12.7066	Dper\GL10255	dper_scaffold_31	0	0.734753	FBpp0275939-D1_1	Muller-C	0	0.0127243	Dwil\GK17924	dwil_scf2_1100000004822	0	0.0954752
yellow-k	st2	3L	FBgn0036504	0.0278618	3.93302	Dsim\GD14550	Scf_3L	0.157181	2.22674	Dsec\GM25535	scaffold_0	0.346213	3.31925	yellow-k-PA	3L	0.343875	3.82153									Dere\GG15905	scaffold_4784	0.0245121	3.39989	Dana\GF23705	scaffold_13337	0	0.69176	Dpse\GA20372	XR_group6	0	3.18394	Dper\GL24856	dper_scaffold_12	0	8.22619	FBpp0274785-D1_1	Muller-AD	0.00713218	2.65769	Dwil\GK10596	dwil_scf2_1100000004949	0	0.0492769
CG16791	st2	3R	FBgn0038881	41.2298	174.065	Dsim\GD19989	Scf_3R	0.0807765	6.23948	Dsec\GM11029	scaffold_6	0.128249	7.60323	CG16791-PA	3R	0.0800181	8.21022	Dyak\GE24998	3R	0.100132	10.0676	Dyak\GE24998	3R	0.016602	3.00975	Dere\GG14705	scaffold_4770	7.21615	6.59088	Dana\GF17258	scaffold_13340	0.117293	3.48794	Dpse\GA14153	2	1.17415	6.37549	Dper\GL27159	dper_scaffold_19	1.94336	4.63015	FBpp0296997-D1_1	Muller-E	0.694561	5.48531	Dwil\GK12767	dwil_scf2_1100000004943	0.0436141	25.3746
CG4822	st5	2L	FBgn0031220	0.00577608	2.92636	Dsim\GD22989	Scf_2L	0	0	Dsec\GM16701	scaffold_14	0.0167488	0.135847	CG4822-PA	2L	0.0203577	0	Dyak\GE16460	2L	0.00424335	0.180337	Dyak\GE16460	2L	0	0.151288	Dere\GG24683	scaffold_4929	0.0908411	0.12975	Dana\GF15047	scaffold_12916	0.160642	0.0189183	Dpse\GA18458	4_group2	0	0.0179916	Dper\GL16572	dper_scaffold_8	188.566	72.0507	FBpp0285197-D1_1	Muller-B	0.106781	0.423648	Dwil\GK24456	dwil_scf2_1100000004585	0.0019757	0.0114627
CG12914	st5	2R	FBgn0033499	0	0.183338	Dsim\GD10723	Scf_2R	0.0386432	0.124654	Dsec\GM21195	scaffold_1	0	0.156514	CG12914-PA	2R	0	0.437067	Dyak\GE19347	2L	0	0.068986	Dyak\GE19347	2L	0	0.119835	Dere\GG24152	scaffold_4929	0	0.153962	Dana\GF12785	scaffold_13266	0	0.0581808	Dpse\GA11905	3	0	0.0319815	Dper\GL11583	dper_scaffold_2	0.00227289	0.609004	FBpp0277790-D1_1	Muller-C	17.7905	40.4395	Dwil\GK17783	dwil_scf2_1100000004822	0.0386286	0.398242
ry	st2	3R	FBgn0003308	0.00748225	46.8617	Dsim\ry	Scf_3R	0.00944292	55.4125	Dsec\GM24078	scaffold_0	1.14264	29.7372	ry-PA	3R	0.0101395	75.5821	Dyak\ry	3R	0.00558393	69.7606	Dyak\ry	3R	0.0210548	44.0806	Dere\Xdh	scaffold_4770	1.42803	64.7425	Dana\Xdh	scaffold_13340	0.00411774	38.4982	Dpse\ry	2	0.336162	22.313	Dper\ry	dper_scaffold_0	0.756198	71.8346					Dwil\ry	dwil_scf2_1100000004902	0	4.76073
HGTX	st5	3L	FBgn0040318	0	0.0948842	Dsim\GD12614	Scf_3L	0	0.340786	Dsec\GM24540	scaffold_0	0	0.117925	HGTX-PB	3L	0	0.196219	Dyak\GE20015	3L	0	0.0301902	Dyak\GE20015	3L	0	0.0205063	Dere\GG13719	scaffold_4784	0	0.162811	Dana\GF25192	scaffold_13337	0	0.123212	Dpse\GA12313	XR_group6	0.0245472	0.0429115	Dper\GL20983	dper_scaffold_41	0.0363621	0.0475171	FBpp0274333-D1_1	Muller-AD	0.0363862	0.0882181	Dwil\GK10592	dwil_scf2_1100000004949	0.250223	0.22995
Asph	st2	2R	FBgn0034075	0.266134	88.0064	Dsim\GD11159	Scf_2R	0.146567	114.825	Dsec\GM21659	scaffold_1	0.0363766	91.6738	Asph-PH	2R	0.0950578	113.819	Dyak\GE11752	2R	0.156988	78.1227	Dyak\GE11752	2R	0.0891861	157.271	Dere\GG20567	scaffold_4845	0.0662618	114.188	Dana\GF11291	scaffold_13266	0.487607	4.68721	Dpse\GA21066	3	0.0066201	1.05076	Dper\GL20566	dper_scaffold_34	0.00347568	2.20778					Dwil\GK21857	dwil_scf2_1100000004513	0.00204483	0.0236839
CG11617	st5	2L	FBgn0031232	0.076451	0.579936	Dsim\GD22979	Scf_2L	0.0586691	0.195322	Dsec\GM16691	scaffold_14	0.0658584	0.299271	CG11617-PA	2L	0.203461	1.3774	Dyak\GE16360	2L	0.0163227	0.205539	Dyak\GE16360	2L	0	0.206289	Dere\GG24672	scaffold_4929	0.0656145	3.17592	Dana\GF24526	scaffold_12943	0	0.187562	Dpse\GA11100	4_group1	0.536079	0.359503					FBpp0279473-D1_1	Muller-B	0	0.0390834	Dwil\GK23761	dwil_scf2_1100000004516	0	0.010871
Cyp305a1	st2	3L	FBgn0036910	0	0.109644	Dsim\GD12248	Scf_3L	0.0155561	0.0352271	Dsec\GM16187	scaffold_29	0.0272055	0.0341931	Cyp305a1-PA	3L	0.0273969	0									Dere\GG13370	scaffold_4784	0.0377904	0.0701562	Dana\GF10847	scaffold_13337	0.246591	0.100708	Dpse\GA21289	XR_group6	0.0713478	0.147464	Dper\GL15679	dper_scaffold_47	0.303272	0.181289	FBpp0274392-D1_1	Muller-AD	0.46909	1.04086	Dwil\GK16701	dwil_scf2_1100000004511	0.0104479	0.275007
CG12880	st5	3R	FBgn0046258	0	0	Dsim\GD21347	Scf_3R	0	0.0589969	Dsec\GM16351	scaffold_22	0	0.571387	CG12880-PA	3R	0	0	Dyak\GE23754	3R	0	0.0657937	Dyak\GE23754	3R	0	0	Dere\GG11569	scaffold_4820	0.0153489	0	Dana\GF16298	scaffold_13340	0	0.0782421	Dpse\GA11881	2	0	0.12894	Dper\GL13708	dper_scaffold_7	0.00334874	0.091726	FBpp0283303-D1_1	Muller-E	0	0.0574445	Dwil\GK11765	dwil_scf2_1100000004902	0.185086	0.758432
Cht2	st5	3L	FBgn0022702	26.2225	0.419602	Dsim\GD13442	Scf_3L	0.0269005	1.6728	Dsec\GM14173	scaffold_2	0.539132	0.850137	Cht2-PA	3L	0.0302057	1.61283	Dyak\GE20919	3L	32.0006	1.7849	Dyak\GE20919	3L	18.1656	1.0089	Dere\GG14565	scaffold_4784	21.6838	13.4873	Dana\GF24966	scaffold_13337	0.148351	0.224551	Dpse\GA15211	XR_group8	15.1991	0.812186	Dper\GL20797	dper_scaffold_29	14.6589	9.18852	FBpp0286881-D1_1	Muller-AD	16.2394	0.894719	Dwil\GK17559	dwil_scf2_1100000004511	0.0297206	0.360591
AOX2	st5	3R	FBgn0038348	0	0.0031217	Dsim\GD20337	Scf_3R	0.0153008	0.0133634	Dsec\GM25761	scaffold_0	0.00555362	0.0128038					Dyak\GE26367	3R	0.0129193	0.0203869	Dyak\GE26367	3R	0.0448684	0.0686009	Dere\GG20453	scaffold_4770	0.0128873	0.00936056					Dpse\GA14971	2	0.00180513	0.0544249	Dper\GL11935	dper_scaffold_6	0.158328	0.264724	FBpp0280984-D1_1	Muller-E	0.00122947	0.100462	Dwil\GK11684	dwil_scf2_1100000004902	0.00339457	0.0269233
Cralbp	st2	3L	FBgn0035636	0.00524861	2.05104					Dsec\GM13897	scaffold_2	0	0.913012	Cralbp-PA	3L	0	0.652199	Dyak\GE20536	3L	0.0261896	2.32585	Dyak\GE20536	3L	0	0.167061	Dere\GG14112	scaffold_4784	0	0.25378	Dana\GF10445	scaffold_13337	0.0649112	0.684259	Dpse\GA10388	XR_group6	0.010956	3.01274	Dper\GL16313	dper_scaffold_61	0.0191724	5.22915	FBpp0275371-D1_1	Muller-AD	0.00737487	0.760168	Dwil\GK17295	dwil_scf2_1100000004511	0.0669045	0.127741
CG32365	st5	3L	FBgn0052365	30.6889	0.698445	Dsim\GD14036	Scf_3L	30.4691	0.252349	Dsec\GM25003	scaffold_0	38.1401	0.518274	CG32365-PA	3L	49.0708	0.31142	Dyak\GE21641	3L	66.7846	0.22692	Dyak\GE21641	3L	35.3071	0.360673	Dere\GG14452	scaffold_4784	31.2491	0.210178	Dana\GF10326	scaffold_13337	35.3896	0.302436	Dpse\GA28379	XR_group8	5.42643	0.0466899	Dper\GL18041	dper_scaffold_24	26.3435	0.988092	FBpp0286456-D1_1	Muller-AD	20.8063	0.577592	Dwil\GK17734	dwil_scf2_1100000004822	20.1175	0.297263
qtc	st5	2L	FBgn0028572	0.00439624	0.910978					Dsec\GM18526	scaffold_5	0.00925864	0.0814329	qtc-PA	2L	0	0.0380912	Dyak\GE11331	2L	0.0146265	0.473745	Dyak\GE11331	2L	0.0245084	0	Dere\GG25049	scaffold_4929	0.236487	0.030363	Dana\GF15721	scaffold_12916	0.0201444	0.554057	Dpse\GA12718	4_group4	0.0844579	1.36199	Dper\GL26551	dper_scaffold_10	0.174516	3.4944	FBpp0287753-D1_1	Muller-B	0.0546793	0.374778	Dwil\GK23882	dwil_scf2_1100000004516	0.00368149	0.304563
CG18067	st5	2R	FBgn0034512	0	0.38645	Dsim\GD11521	Scf_2R	0.0248867	0.179055	Dsec\GM22023	scaffold_1	0	0.0717325	CG18067-PA	2R	0	0.266718	Dyak\GE12120	2R	0	0.352526	Dyak\GE12120	2R	0	0.494732	Dere\GG22040	scaffold_4845	0	0.793686	Dana\GF12271	scaffold_13266	0	0.724336													Dwil\GK19306	dwil_scf2_1100000004510	0	0.0929179
CG8051	st2	X	FBgn0031012	0	0.226689	Dsim\GD15585	Scf_X	0	0.163021	Dsec\GM22747	scaffold_8	0	0.0314225	CG8051-PA	X	0	0.160425	Dyak\GE17395	X	0	0.524425	Dyak\GE17395	X	0	0.192643	Dere\GG18061	scaffold_4690	0	0	Dana\GF15995	scaffold_12903	0	1.78681	Dpse\GA25837	XL_group1e	0	0.0533753	Dper\GL13009	dper_scaffold_13	0.113484	0.0975562	FBpp0280182-D1_1	Muller-A	0.00590521	0.0507668	Dwil\GK19797	dwil_scf2_1100000004515	0.288278	0.0238562
CG34398	st5	2L	FBgn0085427	0	0.0660082	Dsim\GD23574	Scf_2L	0	0.0146382	Dsec\GM17251	scaffold_3	0	0.0476422	CG34398-PA	2L	0	0.0228386	Dyak\GE18805	2L	0	0.0568932	Dyak\GE18805	2L	0	0.110519	Dere\GG25313	scaffold_4929	0	0	Dana\GF15552	scaffold_12916	0	0.0303705	Dpse\GA21824	4_group5	0	0.00467447	Dper\GL25576	dper_scaffold_5	0.00333746	0.0175791	FBpp0285678-D1_1	Muller-B	0	0	Dwil\GK24536	dwil_scf2_1100000004585	0.0117187	0.0240434
Nlg2	st5	2L	FBgn0031866	0.00348418	0.0105507	Dsim\GD23437	Scf_2L	0.550101	0.300215	Dsec\GM16237	scaffold_3	0.00438115	0.470782	neuroligin-PA	2L	0	0	Dyak\GE14187	2L	0	0.0047536	Dyak\GE14187	2L	0	0.0183648	Dere\GG10441	scaffold_4929	0	0.0251235	Dana\GF15433	scaffold_12916	0	0.00927118	Dpse\GA12514	4_group5	0.864598	0.283091	Dper\GL26191	dper_scaffold_5	0.365818	0.151889	FBpp0285759-D1_1	Muller-B	2.22537	1.22501	Dwil\GK24244	dwil_scf2_1100000004585	0	0.0158006
Fbxl7	st2		FBgn0038385			Dsim\GD19058	Scf_3R	0.00977611	62.4632	Dsec\GM24270	scaffold_0	0.0300161	46.9273					Dyak\GE24351	3R	0.015482	44.0334	Dyak\GE24351	3R	0.0140722	47.4586	Dere\GG16963	scaffold_4770	0.268602	66.998	Dana\GF18550	scaffold_13340	0	45.9208	Dpse\GA18044	2	0.00608233	12.1901	Dper\GL22080	dper_scaffold_3	0	32.3297	FBpp0284340-D1_1	Muller-E	0.00658648	18.8234	Dwil\GK11217	dwil_scf2_1100000004902	0.0227207	70.6868
CG42512	st2		FBgn0260238			Dsim\GD17292	Scf_X	0.051212	0.199422	Dsec\GM13453	scaffold_17	0.577239	0.713713	CG42512-PA	X	0.109472	0.766998	Dyak\GE17284	X	3.64281e-07	0.92027	Dyak\GE17284	X	0	3.87334	Dere\GG19063	scaffold_4690	0.478421	3.27834	Dana\GF22297	scaffold_13248	0	3.08669	Dpse\GA22619	XL_group1a	0.266709	5.22513	Dper\GL12884	dper_scaffold_13	0.828465	9.74434	FBpp0272687-D1_1	Muller-A	0.419845	0.869889	Dwil\GK25224	dwil_scf2_1100000004909	0	0.054342
Transitions sophophora to old_world_sophophora
0 to 1
1 to 0
Transitions old_world_sophophora to mel_group
0 to 1
1 to 0
Transitions old_world_sophophora to obscura_group
0 to 1
ppk8	st5	X	FBgn0052792	0.00525424	0.598465					Dsec\GM12297	scaffold_4	3.27122	1.10108					Dyak\GE16304	X	0.034867	0.409733	Dyak\GE16304	X	0.138166	0.418456	Dere\GG18660	scaffold_4690	0.146625	0.759052	Dana\GF22642	scaffold_13248	0.0449435	0.862889	Dpse\GA17142	XL_group1e	0.120551	1.65505	Dper\GL15946	dper_scaffold_22	0.0981769	2.72827	FBpp0279981-D1_1	Muller-A	1.70056	3.70696	Dwil\GK16264	dwil_scf2_1100000004963	0.0489242	0.0639714
CG43693	st2	3L	FBgn0263776	0.00671724	11.0064	Dsim\GD12836	Scf_3L	0.00817895	12.1717	Dsec\GM24786	scaffold_0	0	4.92658					Dyak\GE20249	3L	0.00341723	27.2248	Dyak\GE20249	3L	0.0326425	45.3286	Dere\GG13950	scaffold_4784	0	7.76174	Dana\GF23811	scaffold_13337	0	23.0727	Dpse\GA19514	XR_group6	1.8753	7.43384	Dper\GL15745	dper_scaffold_47	1.75011	8.92891					Dwil\GK12679	dwil_scf2_1100000004729	0.00779258	33.1723
CG7272	st5	3L	FBgn0036501	2.89552	0.276618	Dsim\GD14544	Scf_3L	1.51775	0.115599	Dsec\GM25529	scaffold_0	1.93835	0.171969	CG7272-PA	3L	2.99073	1.04305									Dere\GG15900	scaffold_4784	0.999968	1.3206	Dana\GF23701	scaffold_13337	43.5571	0.598994	Dpse\GA20227	XR_group6	1.85701e-29	1.48076	Dper\GL24812	dper_scaffold_12	3.62547e-86	9.02428e-53	FBpp0274780-D1_1	Muller-AD	0.430436	2.15672	Dwil\GK20413	dwil_scf2_1100000004768	0.119671	0.10199
CG11069	st5	3R	FBgn0039244	0	0.0667351	Dsim\GD21143	Scf_3R	0	0	Dsec\GM26641	scaffold_0	0	0.0865585	CG11069-PA	3R	0	0.055705	Dyak\GE23528	3R	0.100437	0.138336	Dyak\GE23528	3R	0.0618214	0.238293	Dere\GG11334	scaffold_4820	0	0.543199	Dana\GF16310	scaffold_13340	0	0.145376	Dpse\GA10739	2	0.00902233	2.74177	Dper\GL24459	dper_scaffold_0	0.168568	2.95475	FBpp0282297-D1_1	Muller-E	0.292831	2.6749	Dwil\GK12973	dwil_scf2_1100000004943	0	0.0472669
hid	st2	3L	FBgn0003997	0.66162	8.40896	Dsim\GD12350	Scf_3L	0.0849485	2.64265	Dsec\GM14948	scaffold_19	0.503842	2.81528					Dyak\GE22086	3L	0.239038	4.45885	Dyak\GE22086	3L	0.156738	1.07922	Dere\GG15751	scaffold_4784	0.0265552	3.49774	Dana\GF10826	scaffold_13337	0	1.78833	Dpse\GA18676	XR_group6	1.70005	2.13762	Dper\GL22717	dper_scaffold_20	0.481928	2.23417	FBpp0274097-D1_1	Muller-AD	2.80179	1.65015	Dwil\GK11627	dwil_scf2_1100000004762	0.0283442	16.5692
CG11762	st2	3R	FBgn0037618	0	0.134564	Dsim\GD18569	Scf_3R	1.58876e-07	0.0428732	Dsec\GM23758	scaffold_0	6.60449e-13	3.94811e-06	CG11762-PA	3R	0	0.1834	Dyak\GE25902	3R	0.00598478	0.150397	Dyak\GE25902	3R	0	0.326149	Dere\GG12626	scaffold_4770	0.0267609	0.0962074	Dana\GF18185	scaffold_13340	0.0170199	0.254284	Dpse\GA11182	2	1.65946	0.79113	Dper\GL12476	dper_scaffold_6	6.12192	0.116756	FBpp0284776-D2_1	Muller-E	2.82207	1.99339	Dwil\GK11273	dwil_scf2_1100000004902	4.49731e-124	1.36378e-56
CG17732	st5	3L	FBgn0036923	0	0	Dsim\GD14844	Scf_3L	0	0.0433349					CG17732-PB	3L	0	0.0327999	Dyak\GE19639	3L	0	0.0315702	Dyak\GE19639	3L	0	0	Dere\GG16072	scaffold_4784	0	0	Dana\GF23608	scaffold_13337	0.0103876	0.0218121	Dpse\GA14630	XR_group6	0.0156649	6.55521	Dper\GL22673	dper_scaffold_20	0.00476491	9.69563	FBpp0274059-D1_1	Muller-AD	1.34481e-18	8.99541	Dwil\GK17549	dwil_scf2_1100000004511	0.123307	0.00722083
CG1273	st2	3L	FBgn0035522	0.00731996	1.23881	Dsim\GD13830	Scf_3L	0.00330889	2.51429	Dsec\GM14644	scaffold_2	0	6.24651	CG1273-PB	3L	0.00911263	17.8418	Dyak\GE21433	3L	0.00465969	10.9239	Dyak\GE21433	3L	0.135497	4.59241	Dere\GG15213	scaffold_4784	0.00990708	15.4112	Dana\GF25057	scaffold_13337	0.0938962	2.1848	Dpse\GA11775	XR_group8	7.58642	4.65002	Dper\GL12845	dper_scaffold_40	1.68098	0.666573	FBpp0287132-D1_1	Muller-AD	1.85164	1.04702	Dwil\GK10554	dwil_scf2_1100000004949	0.48166	0.207422
CG11320	st5	2L	FBgn0031837	0	0.0636617	Dsim\GD22562	Scf_2L	3.82524	15.6693	Dsec\GM14078	scaffold_3	0	0.906553	CG11320-PB	2L	0	0.0366624	Dyak\GE18426	2L	0	0.418999	Dyak\GE18426	2L	0	0.11056	Dere\GG23607	scaffold_4929	0	0.725223	Dana\GF14345	scaffold_12916	8.35681e-228	0.30379	Dpse\GA10916	4_group5	0	3.83694					FBpp0285775-D1_1	Muller-B	0	2.0104	Dwil\GK24515	dwil_scf2_1100000004585	0	0.392873
P5CDh2	st5	3R	FBgn0053092	1.55743	0.744687	Dsim\GD20905	Scf_3R	1.02182	0.89342	Dsec\GM26382	scaffold_0	0.0248087	0.166382	CG33092-PA	3R	0	1.27864	Dyak\GE10250	3R	0.0125491	0.13893	Dyak\GE10250	3R	0.358308	0.3979	Dere\GG11090	scaffold_4820	2.18252	1.11635	Dana\GF18051	scaffold_13340	0.0589148	0.0823515	Dpse\GA17274	2	1.74059	9.11083	Dper\GL23801	dper_scaffold_0	0.441849	3.28562	FBpp0283498-D1_1	Muller-E	0.324967	13.4879	Dwil\GK22325	dwil_scf2_1100000004921	0.035592	0.141578
CG13436	st5	2R	FBgn0034532	0.0137276	0.327941	Dsim\GD11527	Scf_2R	0	1.13411	Dsec\GM22030	scaffold_1	0	0.084874	CG13436-PA	2R	97.2924	3.81571	Dyak\GE12127	2R	0	0.0316734	Dyak\GE12127	2R	0	0	Dere\GG22046	scaffold_4845	0	0.0443595	Dana\GF12186	scaffold_13266	0	0.0468767	Dpse\GA12286	3	0.00492167	3.96443	Dper\GL17037	dper_scaffold_4	0	2.87424	FBpp0276506-D1_1	Muller-C	0.0233016	3.08627	Dwil\GK21484	dwil_scf2_1100000004513	0.0161532	0.356056
CG10631	st5	2L	FBgn0032817	8.04887	0.369629	Dsim\GD21737	Scf_2L	9.12968	0.301631	Dsec\GM16991	scaffold_7	12.3749	0.469637					Dyak\GE12633	2R	9.88595	0.610694	Dyak\GE12633	2R	8.54118	0.834448	Dere\GG21612	scaffold_4845	6.23845	1.38044	Dana\GF15478	scaffold_12916	4.04329	0.194183	Dpse\GA10453	4_group5	9.49227	2.61268	Dper\GL25623	dper_scaffold_5	15.6787	0.892954	FBpp0285726-D1_1	Muller-B	15.166	5.8386	Dwil\GK15221	dwil_scf2_1100000004521	29.3846	1.29093
CG17119	st2	3R	FBgn0039045	0.0120676	4.44436	Dsim\GD18410	Scf_3R	0.066184	2.25572	Dsec\GM23597	scaffold_0	0.0122553	8.9745	CG17119-PA	3R	0.0569285	7.72194	Dyak\GE23989	3R	0.00631831	2.03869	Dyak\GE23989	3R	0	0.182836	Dere\GG12466	scaffold_4820	4.0666e-44	3.30158	Dana\GF18270	scaffold_13340	0	0.196362	Dpse\GA27047	2	2.88901	1.97581	Dper\GL27354	dper_scaffold_19	7.56809	4.83119	FBpp0283451-D1_1	Muller-E	7.65046	7.76866	Dwil\GK13579	dwil_scf2_1100000004943	0	0
pog	st5	2L	FBgn0051660	0.00847633	0.78299	Dsim\GD23305	Scf_2L	0	0.0492872	Dsec\GM18497	scaffold_5	0	0.0544368	pog-PD	2L	0	0.100582	Dyak\GE18313	2L	0	0.0123626	Dyak\GE18313	2L	0	0.0681517	Dere\GG25024	scaffold_4929	0	0	Dana\GF23529	scaffold_12943	0	0.0407135	Dpse\GA16374	4_group3	0.573574	8.94003	Dper\GL18639	dper_scaffold_1	3.97606	19.461	FBpp0279940-D1_1	Muller-B	8.94843	47.8256	Dwil\GK24468	dwil_scf2_1100000004585	0.00175152	0.207468
CG31148	st5	3R	FBgn0051148	0.0743317	0.186306	Dsim\GD21027	Scf_3R	0	0	Dsec\GM26520	scaffold_0	0	0	CG31148-PA	3R	0	0.259795	Dyak\GE10384	3R	0	0.0342735	Dyak\GE10384	3R	0	0.0414701	Dere\GG11218	scaffold_4820	0	0.375795	Dana\GF16253	scaffold_13340	0	0.157718	Dpse\GA16046	2	0.0152945	1.28109	Dper\GL13654	dper_scaffold_7	0.00467357	0.336593	FBpp0283245-D1_1	Muller-E	0.241067	1.08979	Dwil\GK13189	dwil_scf2_1100000004943	0.00458461	0.0714686
mil	st5	3R	FBgn0267366	0.010076	0.0132033	Dsim\GD21354	Scf_3R	0.0246168	0.0324782									Dyak\GE23767	3R	0	0.0423099	Dyak\GE23767	3R	0	0.084147	Dere\GG11578	scaffold_4820	0	0	Dana\GF16306	scaffold_13340	0.549786	0.297338	Dpse\GA27003	2	0.0561381	4.0911	Dper\GL13720	dper_scaffold_7	0.155747	4.74497	FBpp0302045-D1_1	Muller-E	4.27467	14.9732	Dwil\GK11772	dwil_scf2_1100000004902	0.0180036	0.23994
metro	st2	2R	FBgn0050021	0.26834	1.71315	Dsim\GD25940	Scf_2R	0.336555	1.92687	Dsec\GM20471	scaffold_1	0.0332813	3.66646	metro-PA	2R	0.0588789	0.802908	Dyak\GE13049	2R	0.00616586	8.34842	Dyak\GE13049	2R	0.0688933	1.78303	Dere\GG22696	scaffold_4845	0.0118988	3.36512	Dana\GF12435	scaffold_13266	1.83442	1.56986	Dpse\GA15582	3	1.79538	2.83566	Dper\GL20641	dper_scaffold_34	0.67142	1.65988	FBpp0278759-D1_1	Muller-C	32.5407	66.9931	Dwil\GK20656	dwil_scf2_1100000004510	0	0.546229
Gli	st2	2L	FBgn0001987	0.904703	24.4306	Dsim\GD21942	Scf_2L	0.0373401	20.614	Dsec\GM14210	scaffold_3	0.0721675	33.3774	Gli-PA	2L	1.11334	26.8818	Dyak\GE19390	2L	0.433039	46.001	Dyak\GE19390	2L	0.0470467	78.3452	Dere\GG24195	scaffold_4929	0.0369355	62.7242	Dana\GF14975	scaffold_12916	0.0105844	17.244	Dpse\GA17762	4_group4	1.63967	37.2167	Dper\GL15437	dper_scaffold_93	1.54625	58.2846	FBpp0287378-D1_1	Muller-B	1.11405	31.9506	Dwil\GK24272	dwil_scf2_1100000004585	0.747729	41.4685
CG9975	st5	2R	FBgn0034435	0.00611742	0.00704074	Dsim\GD11446	Scf_2R	0	0.0175512	Dsec\GM21949	scaffold_1	0	0.0938613	CG9975-PA	2R	0.0269433	0.255201	Dyak\GE12040	2R	0	0.0127464	Dyak\GE12040	2R	1.9817	0.652158	Dere\GG21961	scaffold_4845	0.0095976	0.0309878	Dana\GF12329	scaffold_13266	0.204523	0.184288	Dpse\GA22160	3	0.0129441	2.47028	Dper\GL11615	dper_scaffold_2	0	2.23897					Dwil\GK20841	dwil_scf2_1100000004510	0	0.0309943
CG2120	st2	X	FBgn0030005	0.0237615	0.408175	Dsim\GD16881	Scf_X	0.156215	2.71289	Dsec\GM11228	scaffold_44	1.01028	4.11443	CG2120-PB	X	0.582336	4.70904	Dyak\GE15762	X	0.0506621	1.9471	Dyak\GE15762	X	0.0584545	3.57348	Dere\GG19295	scaffold_4690	0	0.454915	Dana\GF21305	scaffold_13117	0.147033	0.093558	Dpse\GA28998	XL_group1e	7.29569	12.1858	Dper\GL20358	dper_scaffold_17	1.55014	5.99367e-38	FBpp0287835-D1_1	Muller-A	4.64507	8.91894	Dwil\GK10134	dwil_scf2_1100000004909	0.013651	0.0611892
Rab3	st5	2R	FBgn0005586	0.0167244	2.70123	Dsim\GD25963	Scf_2R	0.093872	1.93052	Dsec\GM20500	scaffold_1	0	2.11948	Rab3-PA	2R	0.0326954	2.53232	Dyak\GE13081	2R	4.97185e-142	1.9985	Dyak\GE13081	2R	0.0214928	0.4275	Dere\GG22724	scaffold_4845	0	0.311602	Dana\GF11093	scaffold_13266	0	0.0555046	Dpse\GA20450	3	0.38561	2.0113	Dper\GL17187	dper_scaffold_4	0.657188	1.15065					Dwil\GK19661	dwil_scf2_1100000004512	0.0619554	0.420993
CG4476	st5	3L	FBgn0035969	68.6686	0.0797448	Dsim\GD14159	Scf_3L	93.0801	0.322733	Dsec\GM25123	scaffold_0	2.33057	0.326876	CG4476-PB	3L	34.4569	0.168644	Dyak\GE20810	3L	95.8886	0.720015	Dyak\GE20810	3L	55.3565	0.572647	Dere\GG14380	scaffold_4784	47.002	0.245969	Dana\GF10859	scaffold_13337	85.2049	0.69187	Dpse\GA18211	XR_group5	64.6769	23.8084	Dper\GL18425	dper_scaffold_58	38.9518	1.31727	FBpp0288282-D1_1	Muller-AD	80.9484	39.8954	Dwil\GK23734	dwil_scf2_1100000004837	59.9796	0.647003
arg	st2	X	FBgn0023535	0.174101	0.490932	Dsim\GD16510	Scf_X	0	0.128968	Dsec\GM19073	scaffold_10	0.0396375	1.98891	arg-PA	X	0.0471408	2.63271	Dyak\GE16619	X	0.230716	1.41267	Dyak\GE16619	X	0.549263	0.188573	Dere\GG12792	scaffold_4644	0.0725352	1.32732	Dana\GF21939	scaffold_12929	0	0.11871	Dpse\GA14794	XL_group1e	9.12098	9.21259	Dper\GL20388	dper_scaffold_17	30.2988	29.7779	FBpp0288090-D1_1	Muller-A	8.97387	67.1597	Dwil\GK16510	dwil_scf2_1100000004590	0	0.022612
CG9265	st5	2L	FBgn0032910	35.2221	0.317596	Dsim\GD21662	Scf_2L	56.3122	0.0496354	Dsec\GM23287	scaffold_18	9.60826	0.524223	CG9265-PA	2L	63.8979	0.321358	Dyak\GE13009	2R	49.4368	0.246616	Dyak\GE13009	2R	56.7425	0.534236	Dere\GG21531	scaffold_4845	44.0733	0.465169	Dana\GF24197	scaffold_12943	53.4346	0.408996	Dpse\GA21656	4_group1	45.645	9.69587	Dper\GL25873	dper_scaffold_5	62.309	4.49396	FBpp0279509-D1_1	Muller-B	52.9253	4.33048	Dwil\GK24717	dwil_scf2_1100000004585	50.092	0.991027
moody	st5	X	FBgn0025631	0.12069	0.386156					Dsec\GM18925	scaffold_10	0.232488	0.524523	moody-PA	X	0.0733344	0.125677	Dyak\GE16986	X	0.102853	0.0290331	Dyak\GE16986	X	0.121926	0.0401175	Dere\GG12657	scaffold_4644	0.0805065	0.222643	Dana\GF21984	scaffold_12929	0	0	Dpse\GA18107	XL_group1a	0.105216	2.33474	Dper\GL15127	dper_scaffold_28	0.227421	1.46503					Dwil\GK25744	dwil_scf2_1100000004909	0.00970895	0.0544494
CG11983	st5	3R	FBgn0037654	1.39432	2.14258	Dsim\GD18589	Scf_3R	0.210136	0.27325	Dsec\GM23779	scaffold_0	0.227203	0.151712	CG11983-PA	3R	3.50912	1.03877	Dyak\GE25923	3R	0.448554	0.195858	Dyak\GE25923	3R	3.76691	0.182425	Dere\GG14538	scaffold_4770	0	0.014714	Dana\GF16576	scaffold_13340	8.48481	0.515614	Dpse\GA11310	2	4.4776	1.61972	Dper\GL12114	dper_scaffold_6	8.87484	2.82504	FBpp0281145-D1_1	Muller-E	0	0	Dwil\GK11677	dwil_scf2_1100000004902	0.987493	0.216256
ine	st5	2L	FBgn0011603	0	0.0146117					Dsec\GM18085	scaffold_5	0	0.0515563	ine-PC	2L	0	0.547784	Dyak\GE14708	2L	0	0.153745	Dyak\GE14708	2L	0	0.0704338	Dere\GG24369	scaffold_4929	0	0.0132676	Dana\GF23979	scaffold_12943	0	0.0267751	Dpse\GA13735	4_group3	0.339265	1.33865	Dper\GL16025	dper_scaffold_8	0.0358888	0.223973	FBpp0280940-D1_1	Muller-B	1.06275	1.49962	Dwil\GK23923	dwil_scf2_1100000004516	0.0189048	0.31896
CG16965	st5	2L	FBgn0032387	0	0.127705	Dsim\GD23801	Scf_2L	0.0070684	0.274804	Dsec\GM26677	scaffold_16	0	0.618094	CG16965-PB	2L	0	0.153416	Dyak\GE18556	2L	0.00973086	0.851466	Dyak\GE18556	2L	0.00960054	1.16872	Dere\GG23749	scaffold_4929	0	0.760847	Dana\GF21627	scaffold_12943	0.800457	1.12733	Dpse\GA14242	4_group3	0.0236467	6.33294	Dper\GL18536	dper_scaffold_1	0.0181519	12.9039	FBpp0279829-D1_1	Muller-B	0.0193196	3.97562	Dwil\GK15172	dwil_scf2_1100000004521	0.00303196	0.0196951
BBS4	st5	2R	FBgn0033578	0	0.161159	Dsim\GD10768	Scf_2R	0	0.0193448	Dsec\GM21253	scaffold_1	0.0153449	0.283936	BBS4-PA	2R	0	0	Dyak\GE12854	2R	0	0.0255087	Dyak\GE12854	2R	0	0	Dere\GG20164	scaffold_4845	0	0.0130863	Dana\GF12524	scaffold_13266	0	0	Dpse\GA12143	3	0.0480561	1.26405	Dper\GL19930	dper_scaffold_34	0.00915094	1.67153	FBpp0275775-D1_1	Muller-C	0.217275	1.99899	Dwil\GK20950	dwil_scf2_1100000004510	0	0.0443008
swa	st5	X	FBgn0003655	159.474	0.647677	Dsim\GD16194	Scf_X	144.092	7.84161					swa-PA	X	145.585	0.405895	Dyak\GE16466	X	232.508	0.721273	Dyak\GE16466	X	155.377	1.04496	Dere\GG17676	scaffold_4690	129.746	0.365279	Dana\GF22270	scaffold_12929	51.8088	0.172047	Dpse\swa	XL_group1a	173.845	5.90415	Dper\GL13343	dper_scaffold_26	171.876	3.68085
Cp7Fa	st2	X	FBgn0014464	0	0.0286096	Dsim\GD16900	Scf_X	0.0367059	0	Dsec\GM21594	scaffold_35	4.20494	0.307583	Cp7Fa-PC	X	0.154018	0.516813	Dyak\GE15783	X	0.0303014	0.284552	Dyak\GE15783	X	0	0.0469971	Dere\GG18252	scaffold_4690	0	0	Dana\GF22367	scaffold_13248	0.157716	3.51964	Dpse\GA28808	XL_group1e	5.40777	2.44602	Dper\GL20313	dper_scaffold_17	11.8667	7.05943	FBpp0287403-D1_1	Muller-A	12.2836	13.1719	Dwil\GK19988	dwil_scf2_1100000004515	0	0.140589
cher	st5	3R	FBgn0014141	11.2752	4.10397	Dsim\GD20251	Scf_3R	17.1924	1.42027	Dsec\GM15386	scaffold_12	16.315	1.26873	cher-PG	3R	12.8349	16.7006	Dyak\GE26108	3R	13.239	0.707763	Dyak\GE26108	3R	9.82632	1.17664	Dere\GG16792	scaffold_4770	12.7057	1.02683	Dana\GF17864	scaffold_13340	8.13298	0.411396	Dpse\GA26775	2	8.6868	3.32007	Dper\GL27217	dper_scaffold_19	16.3052	2.62267	FBpp0282667-D1_1	Muller-E	7.83491	4.91902	Dwil\GK10886	dwil_scf2_1100000004902	16.0397	0.0985018
CG7058	st2	X	FBgn0030961	0.0205633	0.244129					Dsec\GM22915	scaffold_8	0.0340123	0.52795	CG7058-PB	X	0.0126608	0.602038	Dyak\GE17749	X	0.0517441	1.59035	Dyak\GE17749	X	0.0279483	0.829661	Dere\GG19185	scaffold_4690	0.00842894	0.23265	Dana\GF19133	scaffold_13047	0.506724	0.431256	Dpse\GA20067	XL_group3a	5.87221	4.47501	Dper\GL26995	dper_scaffold_39	0.559009	8.76078	FBpp0272199-D1_1	Muller-A	3.47954	11.4868	Dwil\GK10199	dwil_scf2_1100000004909	0.0235422	0.0058891
rtv	st2	X	FBgn0261277	0.0951013	2.23715	Dsim\GD24538	Scf_X	0	3.30129	Dsec\GM11260	scaffold_15	0.341882	0.628375	rtv-PA	X	0.316843	0.163958	Dyak\GE17315	X	0.947303	0.721285	Dyak\GE17315	X	0.687826	0	Dere\GG18875	scaffold_4690	0.407457	3.18559	Dana\GF22363	scaffold_13248	0.0427664	1.01526	Dpse\GA12667	XL_group1e	4.03334	20.2829	Dper\GL20306	dper_scaffold_17	15.4295	51.2991	FBpp0287325-D1_1	Muller-A	6.51419	33.8387	Dwil\GK18863	dwil_scf2_1100000004909	0	4.27531
Mct1	st5	X	FBgn0023549	3.18531	2.16456	Dsim\Mct1	Scf_X	12.6976	0.15536	Dsec\GM19211	scaffold_10	9.37897	0.155806	Mct1-PA	X	6.61826	0.149941	Dyak\GE14741	v2_chrUn_1678	9.49555	0.078236	Dyak\GE14741	v2_chrUn_1678	21.9998	0.151422	Dere\GG12920	scaffold_4644	10.0811	0.0262026	Dana\Mct1	scaffold_12929	2.44676	0.0303156	Dpse\GA17462	XL_group1a	25.5695	1.68611e+07					FBpp0273172-D1_1	Muller-A	27.8392	16.2473	Dwil\GK16068	dwil_scf2_1100000004963	17.8949	0.16325
CG9289	st5	2L	FBgn0032058	0.0070199	0.43813	Dsim\GD22389	Scf_2L	0	0.0149813	Dsec\GM12791	scaffold_3	13.6146	76.3512	CG9289-PA	2L	12.5017	26.4222	Dyak\GE10839	2L	0	0.0456885	Dyak\GE10839	2L	0.181235	0.946111	Dere\GG24058	scaffold_4929	0	0.0669807	Dana\GF14361	scaffold_12916	0.015183	0.750683	Dpse\GA21673	4_group5	0.00605267	1.17262	Dper\GL26221	dper_scaffold_5	0	2.5242	FBpp0285789-D1_1	Muller-B	3.07041	9.02197	Dwil\GK18668	dwil_scf2_1100000004884	0.143721	0.1497
CG5281	st2	3R	FBgn0037902	0.173517	29.9361	Dsim\GD18756	Scf_3R	0.0334872	9.70769	Dsec\GM23946	scaffold_0	1.77896	33.7474	CG5281-PA	3R	0.0465018	20.5214	Dyak\GE26098	3R	0.113758	42.8285	Dyak\GE26098	3R	1.415	19.7466	Dere\GG18167	scaffold_4770	0	45.6894	Dana\GF18371	scaffold_13340	0	12.7374	Dpse\GA18783	2	3.5803	1.4924	Dper\GL12375	dper_scaffold_6	12.2102	6.06803	FBpp0284665-D1_1	Muller-E	15.136	3.36763	Dwil\GK11296	dwil_scf2_1100000004902	0.0162518	0.281496
SIFaR	st5	3R	FBgn0038880	0	2.35248	Dsim\GD19990	Scf_3R	0	0.152153	Dsec\GM15085	scaffold_38	0	0.389438	SIFR-PA	3R	0.00850236	0.0593351	Dyak\GE24999	3R	0	0.593873	Dyak\GE24999	3R	0	0.0670127	Dere\GG14716	scaffold_4770	0	0.437889	Dana\GF17259	scaffold_13340	0.00709982	0.284412	Dpse\GA10579	2	0.00737486	1.81831	Dper\GL27160	dper_scaffold_19	0.00170351	9.29626	FBpp0296999-D1_1	Muller-E	0	3.35801	Dwil\GK12768	dwil_scf2_1100000004943	0.00137384	0.203825
betaTub60D	st5	2R	FBgn0003888	0.550145	0.28488					Dsec\GM11852	scaffold_23	0.0476657	0.14523	betaTub60D-PA	2R	1.46976	5.80933	Dyak\GE14397	2R	0.0467557	0.159602	Dyak\GE14397	2R	0.0273488	0.524845	Dere\GG22960	scaffold_4845	4.418	20.3772	Dana\GF11391	scaffold_13266	0.0939369	0.0796382	Dpse\GA17427	3	0.0628524	1.3307					FBpp0275792-D1_1	Muller-C	0.0924746	6.05967	Dwil\GK22203	dwil_scf2_1100000004558	0.0195005	0.0684335
CG16854	st5	2L	FBgn0032338	0	0.382596	Dsim\GD23760	Scf_2L	0	0.131992	Dsec\GM18862	scaffold_3	0	9.36575	CG16854-PB	2L	0	0.197206	Dyak\GE18511	2L	0	0.177531	Dyak\GE18511	2L	0	0.729199	Dere\GG23704	scaffold_4929	0	0.392766	Dana\GF15639	scaffold_12916	0	0.266893	Dpse\GA14180	4_group3	0	1.65382	Dper\GL19540	dper_scaffold_1	0.00522645	1.05753	FBpp0280668-D1_1	Muller-B	0	3.55005	Dwil\GK18361	dwil_scf2_1100000004945	0.00175993	0.0584405
Hil	st5	2R	FBgn0050147	1.7289	2.90461	Dsim\GD25265	Scf_2R	0.116684	0.215857	Dsec\GM19775	scaffold_1	0.257241	0.291518	Hil-PB	2R	0.362185	0.390073	Dyak\GE13786	2R	0.228627	0.236058	Dyak\GE13786	2R	1.33001	0.145504	Dere\GG20846	scaffold_4845	0.202156	0.302535	Dana\GF12756	scaffold_13266	0.0867703	0	Dpse\GA15676	3	2.90617	2.89088	Dper\GL17438	dper_scaffold_4	3.35001	4.60801	FBpp0277947-D1_1	Muller-C	3.84682	46.2871	Dwil\GK21830	dwil_scf2_1100000004513	0.033763	0.371432
dpr6	st5	3L	FBgn0040823	1.38004	0.108928	Dsim\GD14231	Scf_3L	10.9998	0.380085	Dsec\GM25200	scaffold_0	1.32062	0.0624216	dpr6-PA	3L	30.099	5.05939	Dyak\GE21735	3L	0.0259436	0.0939477	Dyak\GE21735	3L	0.0323191	0.0360685	Dere\GG15427	scaffold_4784	0.371106	0.0920407	Dana\GF10587	scaffold_13337	0.0183499	0	Dpse\GA23478	XR_group6	10.5107	4.51301	Dper\GL12584	dper_scaffold_27	25.1271	9.32901	FBpp0274326-D1_1	Muller-AD	19.1101	6.71591	Dwil\GK17458	dwil_scf2_1100000004511	0.128174	0.0666458
CG8129	st5	3R	FBgn0037684	0.023023	0.532424	Dsim\GD18609	Scf_3R	0	0.615596	Dsec\GM23798	scaffold_0	0	0.11266	CG8129-PB	3R	0	0.880898	Dyak\GE25945	3R	0	1.28889	Dyak\GE25945	3R	0	5.07251	Dere\GG16474	scaffold_4770	0	2.15145	Dana\GF17208	scaffold_13340	0	0.055115	Dpse\GA20840	2	0.00644845	3.96515	Dper\GL13817	dper_scaffold_7	0	4.11197	FBpp0282771-D1_1	Muller-E	0.00178327	2.35091	Dwil\GK11369	dwil_scf2_1100000004902	0	1.46347
CG31121	st5	3R	FBgn0051121	0	0.0330725	Dsim\GD18254	Scf_3R	0	0.00951808	Dsec\GM23447	scaffold_0	0	0.0189303	CG31121-PA	3R	0	0.0165864	Dyak\GE10759	3R	0	0.266008	Dyak\GE10759	3R	0	0.365361	Dere\GG12304	scaffold_4820	0	0.443049	Dana\GF18680	scaffold_13340	0.0058677	0.112396	Dpse\GA16025	2	0.0917008	7.08637	Dper\GL23078	dper_scaffold_0	11.4818	18.9788	FBpp0283693-D1_1	Muller-E	3.66671	5.94763	Dwil\GK14275	dwil_scf2_1100000004943	0.00283319	0.199566
CG13875	st5	3L	FBgn0035104	4.97993	7.52662	Dsim\GD13549	Scf_3L	0.0463962	0.160653	Dsec\GM14312	scaffold_2	0.017019	0.524361	CG13875-PA	3L	0	1.13505	Dyak\GE21059	3L	0.126581	0.117026	Dyak\GE21059	3L	0.00987842	0.140918	Dere\GG14696	scaffold_4784	3.06974	0.767083	Dana\GF24858	scaffold_13337	4.24751	0.33271	Dpse\GA12591	XR_group8	8.8739	1.08901	Dper\GL16152	dper_scaffold_32	9.01118	1.88555	FBpp0286509-D1_1	Muller-AD	4.26884	3.36566	Dwil\GK12495	dwil_scf2_1100000004729	0.00527498	0.127349
Spat	st5	X	FBgn0014031	0.234291	0.664558	Dsim\GD16801	Scf_X	0.141445	0.474955	Dsec\GM12493	scaffold_4	0.491987	1.28411	Spat-PA	X	0.234494	0.516982	Dyak\Spat	X	0.169869	0.432473	Dyak\Spat	X	0.296231	0.109629	Dere\GG19592	scaffold_4690	0.136988	1.58498	Dana\GF22261	scaffold_12929	0.192414	0.727114	Dpse\GA17780	XL_group1a	0.369596	3.86812	Dper\GL14301	dper_scaffold_11	0.176894	2.02028	FBpp0272957-D1_1	Muller-AD	17.0863	78.6858	Dwil\GK20138	dwil_scf2_1100000004515	0.06904	0.12283
CG4623	st2	3L	FBgn0035587	0.0910311	5.32525	Dsim\GD13879	Scf_3L	0.0361363	1.96759	Dsec\GM14696	scaffold_2	0.0323151	3.92318	CG4623-PA	3L	0.0615522	2.66723	Dyak\GE21484	3L	1.30246	6.14963	Dyak\GE21484	3L	0.329317	7.07252	Dere\GG15262	scaffold_4784	0	0.882214	Dana\GF23970	scaffold_13337	0.0333056	3.48934	Dpse\GA18310	XR_group3a	3.08606	5.45458	Dper\GL22618	dper_scaffold_23	0.430901	2.58926	FBpp0278083-D1_1	Muller-AD	1.79981	2.9207	Dwil\GK20321	dwil_scf2_1100000004768	0.0115784	0.253359
Cib2	st5	2R	FBgn0034558	0.0120949	0.1075	Dsim\GD11545	Scf_2R	0.111313	4.09072	Dsec\GM15782	scaffold_9	1.14485e-32	0.0169752	CG9236-PB	2R	7.30383e-104	1.07691	Dyak\GE12146	2R	1.62393e-241	2.82201e-43	Dyak\GE12146	2R	0	11.2639	Dere\GG22065	scaffold_4845	1.72957e-162	0.0892832	Dana\GF12205	scaffold_13266	0	0.179586	Dpse\GA21632	3	1.99389e-68	1.59944	Dper\GL17058	dper_scaffold_4	1.04066e-62	2.66897					Dwil\GK23329	dwil_scf2_1100000004954	8.87107e-128	0.0882953
tap	st5	3L	FBgn0015550	0.00580293	0.219336	Dsim\GD14703	Scf_3L	0.0153559	0.364728	Dsec\GM25695	scaffold_0	0.0219988	0.208431	tap-PA	3L	0	0.439011	Dyak\GE19908	3L	0	6.6154	Dyak\GE19908	3L	0	2.27342	Dere\GG13612	scaffold_4784	0	4.02787	Dana\GF10169	scaffold_13337	0	0.0307444	Dpse\GA20508	XR_group6	0.00430356	3.64579	Dper\GL15578	dper_scaffold_35	0	4.46723	FBpp0274257-D1_1	Muller-AD	0.00417262	1.55517	Dwil\GK16635	dwil_scf2_1100000004511	0	0.119372
CG18095	st5	2L	FBgn0028872	0	1.44715	Dsim\GD22020	Scf_2L	0	0.295411	Dsec\GM14963	scaffold_3	0	0.0263995	CG18095-PB	2L	0.00663469	3.21107	Dyak\GE25170	2L	0	0.0209595	Dyak\GE25170	2L	0	0.100468	Dere\GG10163	scaffold_4929	0	0.0207282	Dana\GF15603	scaffold_12916	0	0.206066	Dpse\GA14790	4_group4	0	5.69779	Dper\GL21060	dper_scaffold_16	0	37.3419	FBpp0287963-D1_1	Muller-B	0.00780885	8.32145	Dwil\GK15104	dwil_scf2_1100000004521	0.00755695	0.0102353
Bro	st2	3L	FBgn0013755	0.0698192	45.1183	Dsim\GD13634	Scf_3L	0.090033	95.4563	Dsec\GM14432	scaffold_2	0.192339	331.361	Bro-PA	3L	0.0829828	343.587	Dyak\GE21173	3L	0.0154898	62.6668	Dyak\GE21173	3L	0.0664815	215.315	Dere\GG14810	scaffold_4784	1.94061	32.5218	Dana\GF24821	scaffold_13337	0	208.159	Dpse\GA23814	XR_group6	2.26256	182.908	Dper\GL11917	dper_scaffold_27	0.694403	176.454	FBpp0275261-D2_1	Muller-AD	23.1229	66.3148	Dwil\GK24398	dwil_scf2_1100000004837	0	280.628
CG32054	st2	3L	FBgn0052054	0	0.146061	Dsim\GD12874	Scf_3L	0	0	Dsec\GM24822	scaffold_0	0	0.19339	CG32054-PA	3L	0.0250745	0.455303	Dyak\GE20284	3L	0	0.612959	Dyak\GE20284	3L	0	0.579543	Dere\GG13988	scaffold_4784	2.61109e-08	1.40704	Dana\GF23845	scaffold_13337	0	0.0289835	Dpse\GA23811	XR_group6	2.60965	0.341382	Dper\GL11806	dper_scaffold_27	4.43289	1.73344	FBpp0275250-D1_1	Muller-AD	1.44517	1.14407	Dwil\GK24096	dwil_scf2_1100000004837	0	0.00845846
CG4546	st5	3R	FBgn0038373	0	0.037154	Dsim\GD19054	Scf_3R	0.00909225	0.0874595	Dsec\GM24266	scaffold_0	0.0100145	0	CG4546-PA	3R	0.032168	0.068874	Dyak\GE24345	3R	0	0.0989083	Dyak\GE24345	3R	0.0133715	0	Dere\GG16959	scaffold_4770	0.744197	0.669808	Dana\GF18548	scaffold_13340	0.058804	0.0561299	Dpse\GA18246	2	0.027949	2.18768	Dper\GL22076	dper_scaffold_3	0.236157	7.27311	FBpp0284336-D1_1	Muller-E	0.200876	7.80185	Dwil\GK11215	dwil_scf2_1100000004902	0.00369646	0.0462462
alpha-Est2	st2	3R	FBgn0015570	0.0232576	2.97981	Dsim\GD19941	Scf_3R	0	1.4223	Dsec\GM10966	scaffold_6	11.5139	65.6345	alpha-Est2-PA	3R	200.305	1028.07	Dyak\GE11183	v2_chr3R_random_110	0.0110904	0.173286	Dyak\GE11183	v2_chr3R_random_110	0	0.0441974	Dere\GG14130	scaffold_4770	0.00743747	0.0331721	Dana\GF17678	scaffold_13340	0	0.0657001	Dpse\GA15379	2	6.08226	0.138426	Dper\GL12447	dper_scaffold_6	13.1527	0.0591084	FBpp0284746-D1_1	Muller-E	8.36445	0.279549	Dwil\GK12015	dwil_scf2_1100000004902	0.325115	0.591154
Orct2	st2	3R	FBgn0086365	0.00407558	2.04601	Dsim\GD21082	Scf_3R	0	11.663	Dsec\GM26580	scaffold_0	6.4379	13.8497	Orct2-PA	3R	0	1.37677	Dyak\GE23463	3R	1.91738	3.62675	Dyak\GE23463	3R	0.285006	0.231109	Dere\GG11271	scaffold_4820	0.336205	2.90561	Dana\GF16119	scaffold_13340	0.0105382	1.74634	Dpse\GA12403	2	3.80327	2.59128	Dper\GL23361	dper_scaffold_0	9.5957	14.7344	FBpp0283965-D1_1	Muller-E	1.93729	27.1171	Dwil\GK11734	dwil_scf2_1100000004902	0.0392958	7.45904
Obp99a	st2	3R	FBgn0039678	0.0438517	63.2996	Dsim\Obp99a	Scf_3R	0.313278	138.998	Dsec\Obp99a	scaffold_4	1.37604	450.781	Obp99a-PA	3R	0.761748	128.527	Dyak\Obp99a	3R	0.265192	121.919	Dyak\Obp99a	3R	0.315667	1240.79	Dere\Obp99a	scaffold_4820	0.322274	796.183	Dana\Obp99a	scaffold_12911	0.00843177	610.14	Dpse\Obp99a	2	1.22867	1505.27	Dper\Obp99a	dper_scaffold_7	0	814.39	FBpp0283196-D1_1	Muller-E	1.30077	1255.77	Dwil\Obp99a	dwil_scf2_1100000004902	0	3055.51
CG32483	st5	3L	FBgn0052483	0.0114738	1.06494	Dsim\GD13517	Scf_3L	0.0884088	0.297272					CG32483-PA	3L	0	0.21525	Dyak\GE21005	3L	0	0.490104	Dyak\GE21005	3L	0	0.69002	Dere\GG14645	scaffold_4784	0	0.150813	Dana\GF24074	scaffold_13337	0	0.914095	Dpse\GA16937	XR_group8	0.136681	4.39646	Dper\GL20837	dper_scaffold_29	0.0364616	2.57069					Dwil\GK16682	dwil_scf2_1100000004511	4.4276e-155	1.10712e-05
tna	st2	3L	FBgn0026160	0.0353983	51.1834	Dsim\GD14262	Scf_3L	0.0369729	48.3028	Dsec\GM25229	scaffold_0	0.0294423	10.0987	tna-PC	3L	0.0115424	25.4803	Dyak\GE21765	3L	0.0119413	49.888	Dyak\GE21765	3L	0.0204348	48.996	Dere\GG15453	scaffold_4784	0.126409	83.0333	Dana\GF10612	scaffold_13337	0.00860014	35.6507	Dpse\GA23496	XR_group6	11.838	40.1556	Dper\GL21854	dper_scaffold_36	24.6046	122.683	FBpp0274376-D1_1	Muller-AD	14.1239	36.8888	Dwil\GK25134	dwil_scf2_1100000004762	1.15594	75.8155
CG14321	st2	3R	FBgn0038540	0.0171546	23.2531	Dsim\GD19185	Scf_3R	0.0969261	7.04374	Dsec\GM15261	scaffold_12	0.0719442	20.4389	CG14321-PA	3R	0.0801957	20.8126	Dyak\GE25497	3R	29.2427	95.523	Dyak\GE25497	3R	1.68308	30.6282	Dere\GG22482	scaffold_4770	0	5.03034	Dana\GF16851	scaffold_13340	0	2.05679	Dpse\GA25146	3	28.3801	15.9903	Dper\GL11860	dper_scaffold_37	33.4459	27.7928	FBpp0278825-D1_1	Muller-C	39.5137	61.1788
fs(1)Ya	st5	X	FBgn0000927	39.7707	0.228269	Dsim\GD24737	Scf_X	41.9691	0.237222					fs(1)Ya-PA	X	18.9617	0.215871	Dyak\GE16278	X	43.1103	0.665152	Dyak\GE16278	X	28.3296	0.434772	Dere\GG18625	scaffold_4690	53.9532	3.79604	Dana\GF22453	scaffold_13248	51.8689	0.556507	Dpse\GA15438	XL_group1e	87.6635	1.59239	Dper\GL19916	dper_scaffold_18	99.8346	1.45756	FBpp0286494-D1_1	Muller-A	95.0975	20.9791	Dwil\GK25598	dwil_scf2_1100000004909	75.4361	2.89887e-81
CG4576	st5	3R	FBgn0038366	0.059136	0.950035	Dsim\GD19051	Scf_3R	0.0182766	0.406392	Dsec\GM24263	scaffold_0	0.035121	0.446114	CG4576-PA	3R	0.0112246	0.415913	Dyak\GE24342	3R	0.0171787	0.225329	Dyak\GE24342	3R	0.0989996	0.0206336	Dere\GG16956	scaffold_4770	0.122208	0.940026	Dana\GF18545	scaffold_13340	0.0277377	0.630752	Dpse\GA18270	2	0.0673732	1.64539	Dper\GL21652	dper_scaffold_3	0.133523	3.98456	FBpp0281543-D1_1	Muller-E	0.288548	6.39323	Dwil\GK12787	dwil_scf2_1100000004943	0.0115073	0.0272533
Arl6	st2	2R	FBgn0034446	0.0818554	0.081546					Dsec\GM21961	scaffold_1	0.0957201	0.802019	CG7735-PA	2R	46.8611	137.589	Dyak\GE12051	2R	0.26652	0.109489	Dyak\GE12051	2R	0.374529	3.59418	Dere\GG21972	scaffold_4845	129.037	480.163	Dana\GF12343	scaffold_13266	0	0.645594	Dpse\GA27685	Unknown_singleton_1898	3.49383	11.6843	Dper\GL17745	dper_scaffold_4	0	1.2485	FBpp0285107-D1_1	Muller-C	33.4918	192.723	Dwil\GK15871	dwil_scf2_1100000004514	0.184065	1.04428
CG9932	st2	2L	FBgn0262160	0.00216026	0.0420992					Dsec\GM25899	scaffold_16	0	0.0104471	CG9932-PA	2L	0	0.0115909	Dyak\GE11950	2L	0.00523124	0.0222098	Dyak\GE11950	2L	0	0.0539984	Dere\GG10230	scaffold_4929	0.0411233	0.0104464	Dana\GF15648	scaffold_12916	0	0.0197617	Dpse\GA22134	4_group4	3.14169	0.310503	Dper\GL24778	dper_scaffold_46	9.40883	0.628195	FBpp0287626-D1_1	Muller-B	4.6346	0.190853	Dwil\GK14812	dwil_scf2_1100000004521	0.20074	0.0495731
CG15701	st2	2R	FBgn0034095	0.186784	2.72443	Dsim\GD15432	Scf_2R	0.202237	0.723493	Dsec\GM21674	scaffold_1	0.362209	1.22547	CG15701-PA	2R	0.0345399	0.182517	Dyak\GE11769	2R	1.09328	0.569663	Dyak\GE11769	2R	0.221785	1.19875	Dere\GG20583	scaffold_4845	0.0818343	1.47712	Dana\GF12274	scaffold_13266	0.0807781	5.99408	Dpse\GA13899	3	8.14932	1.2703	Dper\GL17671	dper_scaffold_4	8.26914	2.81157	FBpp0278090-D1_1	Muller-C	2.11226	3.77031	Dwil\GK20629	dwil_scf2_1100000004510	0.0116728	2.76063
CG42450	st5	X	FBgn0259927	0.127648	0.193169					Dsec\GM22917	scaffold_8	6.26522	3.0714	CG42450-PA	X	1.25466	0.117869	Dyak\GE17750	X	0.0380681	0.514726	Dyak\GE17750	X	0.465606	0.268367	Dere\GG19186	scaffold_4690	3.5501	7.32445	Dana\GF19135	scaffold_13047	0	0	Dpse\GA20097	XL_group3a	3.59864	7.98917	Dper\GL26996	dper_scaffold_39	6.07345	3.13326	FBpp0272200-D1_1	Muller-A	4.41556	9.54744	Dwil\GK10200	dwil_scf2_1100000004909	0	0.0377546
topi	st2	3R	FBgn0037751	0.0542759	0.755408	Dsim\GD18648	Scf_3R	0.843687	3.3558	Dsec\GM23838	scaffold_0	0.0137361	0.0201277	topi-PA	3R	0.0336199	0.0203567	Dyak\GE25986	3R	0	0.152591	Dyak\GE25986	3R	0	0.0162717	Dere\GG17136	scaffold_4770	0	0.120007	Dana\GF23040	scaffold_12911	0.967947	0.745429	Dpse\GA21108	2	2.00799	1.38327	Dper\GL24305	dper_scaffold_0	7.33063	63.5937	FBpp0282153-D1_1	Muller-E	131.672	841.204	Dwil\GK11965	dwil_scf2_1100000004902	0.0100824	0.211266
topi	st5	3R	FBgn0037751	0.0542759	0.755408	Dsim\GD18648	Scf_3R	0.843687	3.3558	Dsec\GM23838	scaffold_0	0.0137361	0.0201277	topi-PA	3R	0.0336199	0.0203567	Dyak\GE25986	3R	0	0.152591	Dyak\GE25986	3R	0	0.0162717	Dere\GG17136	scaffold_4770	0	0.120007	Dana\GF23040	scaffold_12911	0.967947	0.745429	Dpse\GA21108	2	2.00799	1.38327	Dper\GL24305	dper_scaffold_0	7.33063	63.5937	FBpp0282153-D1_1	Muller-E	131.672	841.204	Dwil\GK11965	dwil_scf2_1100000004902	0.0100824	0.211266
CG12950	st5	3R	FBgn0037736	0.00273893	3.00313	Dsim\GD20766	Scf_3R	0	0.136949	Dsec\GM26222	scaffold_0	0	0.968154	CG12950-PA	3R	0	0.686401	Dyak\GE24740	3R	0.00352575	1.41867	Dyak\GE24740	3R	0	0.532435	Dere\GG17336	scaffold_4770	0	0.123633	Dana\GF11518	scaffold_13250	0	0.439827	Dpse\GA11933	2	1.99045	3.93265	Dper\GL21886	dper_scaffold_3	0.0903868	4.2987	FBpp0281758-D1_1	Muller-E	0.376024	1.52596	Dwil\GK13915	dwil_scf2_1100000004943	0.0877115	0.224719
ATP8B	st2	3R	FBgn0037989	0.00934832	0.00277058	Dsim\GD20604	Scf_3R	0.00440006	0.0194193	Dsec\GM26043	scaffold_0	0.0745843	0.0357713					Dyak\GE24551	3R	0	0.0175922	Dyak\GE24551	3R	0.156761	0.0129285	Dere\GG17161	scaffold_4770	2.74757	0.222212	Dana\GF17746	scaffold_13340	0.0120034	0	Dpse\GA13214	2	3.265	0.465498	Dper\GL21577	dper_scaffold_3	0.161436	0.309601	FBpp0281470-D1_1	Muller-E	31.2262	2.14048	Dwil\GK25424	dwil_scf2_1100000004909	0.0157697	0.0684034
Nhe2	st2	2L	FBgn0040297	0.823771	26.3836	Dsim\GD24301	Scf_2L	1.52855	25.8808	Dsec\GM23392	scaffold_18	2.48614	14.0274	Nhe2-PG	2L	1.19725	27.7794	Dyak\GE12897	2R	4.59922	26.65	Dyak\GE12897	2R	2.555	12.0382	Dere\GG21280	scaffold_4845	1.45521	23.0126	Dana\GF21085	scaffold_12943	0.0153494	44.8625	Dpse\GA21648	4_group1	20.5013	4.40332	Dper\GL25889	dper_scaffold_5	26.2958	7.42033	FBpp0278870-D1_1	Muller-B	17.2042	5.2606	Dwil\GK24318	dwil_scf2_1100000004585	0	30.2031
CG12851	st2	2R	FBgn0035086	0.120075	0.0256328	Dsim\GD11913	Scf_2R	0.0213097	0.0919521	Dsec\GM11917	scaffold_23	0.0944057	0.148572	CG12851-PB	2R	0.170086	0.180809	Dyak\GE14458	2R	0.0297182	0.0270985	Dyak\GE14458	2R	0.0459832	0	Dere\GG23021	scaffold_4845	0.00455831	0.0161941	Dana\GF13355	scaffold_13266	0.235787	0.130533	Dpse\GA11855	3	46.8894	0.996695	Dper\GL11202	dper_scaffold_2	59.1717	2.37432	FBpp0277381-D1_1	Muller-C	45.7664	1.96711	Dwil\GK20893	dwil_scf2_1100000004510	0.00107827	0.0736076
lab	st5	3R	FBgn0002522	0.0133914	0.498793					Dsec\GM10536	scaffold_6	0	0.330474	lab-PA	3R	0.25028	3.58565	Dyak\GE25839	3R	0.00582835	0.952347	Dyak\GE25839	3R	0.00854837	1.52399	Dere\GG10324	scaffold_4770	0	0.968278	Dana\GF17803	scaffold_13340	0	0.454778	Dpse\lab	2	0.946806	5.18873	Dper\GL22053	dper_scaffold_3	1.50928	6.09097	FBpp0300466-D1_1	Muller-E	6.67537998180576e-316	1.17124	Dwil\GK10836	dwil_scf2_1100000004902	0.0249977	0.172773
Sur	st2	2L	FBgn0028675	0.0040641	0.028645					Dsec\GM11960	scaffold_3	0.00580209	0.0590187	Sur-PB	2L	0.00925841	0.0200381	Dyak\GE26395	2L	0.0275283	0.122184	Dyak\GE26395	2L	0.0303933	0.0276905	Dere\GG23976	scaffold_4929	0.0118063	0.107866	Dana\GF14135	scaffold_12916	0.0107471	0.00903914	Dpse\GA25872	4_group3	5.78403	5.02152	Dper\GL19182	dper_scaffold_1	2.48911	5.7022
Sur	st5	2L	FBgn0028675	0.0040641	0.028645					Dsec\GM11960	scaffold_3	0.00580209	0.0590187	Sur-PB	2L	0.00925841	0.0200381	Dyak\GE26395	2L	0.0275283	0.122184	Dyak\GE26395	2L	0.0303933	0.0276905	Dere\GG23976	scaffold_4929	0.0118063	0.107866	Dana\GF14135	scaffold_12916	0.0107471	0.00903914	Dpse\GA25872	4_group3	5.78403	5.02152	Dper\GL19182	dper_scaffold_1	2.48911	5.7022
ninaG	st5	3R	FBgn0037896	0.101995	0.884996					Dsec\GM26100	scaffold_0	0.0220639	2.28225	ninaG-PA	3R	0.311831	1.26009	Dyak\GE24624	3R	0.0031205	0.0974559	Dyak\GE24624	3R	0	0	Dere\GG17223	scaffold_4770	1.05435	0.116747	Dana\GF18158	scaffold_13340	0	0.0207308	Dpse\GA19817	2	2.21191e-94	4.61895	Dper\GL12605	dper_scaffold_6	1.11182e-158	0.103259	FBpp0284904-D1_1	Muller-E	0	5.3041	Dwil\GK11795	dwil_scf2_1100000004902	0	0.163656
CG9743	st2	3R	FBgn0039756	0.00649648	0.0773773	Dsim\GD17212	Scf_3R	0	0.0610799	Dsec\GM12168	scaffold_4	2.97548	1.05271	CG9743-PA	3R	4.16448	26.7792	Dyak\GE23401	3R	0.00728231	0.0150061	Dyak\GE23401	3R	5.54473	14.0194	Dere\GG11952	scaffold_4820	0	0.385167	Dana\GF16192	scaffold_13340	0.0130851	0	Dpse\GA22002	2	20.5568	2.46375	Dper\GL14059	dper_scaffold_7	17.8019	6.2603	FBpp0283139-D1_1	Muller-E	11.6267	3.65692	Dwil\GK13141	dwil_scf2_1100000004943	0.0602425	0.368395
CG9743	st5	3R	FBgn0039756	0.00649648	0.0773773	Dsim\GD17212	Scf_3R	0	0.0610799	Dsec\GM12168	scaffold_4	2.97548	1.05271	CG9743-PA	3R	4.16448	26.7792	Dyak\GE23401	3R	0.00728231	0.0150061	Dyak\GE23401	3R	5.54473	14.0194	Dere\GG11952	scaffold_4820	0	0.385167	Dana\GF16192	scaffold_13340	0.0130851	0	Dpse\GA22002	2	20.5568	2.46375	Dper\GL14059	dper_scaffold_7	17.8019	6.2603	FBpp0283139-D1_1	Muller-E	11.6267	3.65692	Dwil\GK13141	dwil_scf2_1100000004943	0.0602425	0.368395
FucTA	st5	3L	FBgn0036485	0.0224286	1.51215	Dsim\GD14528	Scf_3L	0.00825488	0.112614	Dsec\GM25513	scaffold_0	0.0255488	0.221207	FucTA-PA	3L	169.395	647.319	Dyak\GE22226	3L	0.0187526	0.280987	Dyak\GE22226	3L	0	0.0224052	Dere\GG15882	scaffold_4784	0	0.101213	Dana\GF23688	scaffold_13337	0.0273631	0.163311	Dpse\GA19918	XR_group6	0.043423	1.78443	Dper\GL24771	dper_scaffold_12	0.178219	2.46631	FBpp0274768-D1_1	Muller-AD	0.0198472	7.68065	Dwil\GK20401	dwil_scf2_1100000004768	0.0342429	0.0403152
CG14905	st2	3R	FBgn0038452	0.0141415	0.252555	Dsim\GD20274	Scf_3R	0	0.0820065	Dsec\GM15416	scaffold_12	0	0.114214	CG14905-PA	3R	0	0.0264871	Dyak\GE26136	3R	0.0183337	0.0863171	Dyak\GE26136	3R	0.0112137	0.0451343	Dere\GG16817	scaffold_4770	0	0.120033	Dana\GF17068	scaffold_13340	0.00982785	0	Dpse\GA13343	2	9.81518	32.2257	Dper\GL24529	dper_scaffold_0	18.9786	46.6778	FBpp0284185-D1_1	Muller-E	10.6018	48.8891	Dwil\GK13857	dwil_scf2_1100000004943	0.0257199	0.37
CG14905	st5	3R	FBgn0038452	0.0141415	0.252555	Dsim\GD20274	Scf_3R	0	0.0820065	Dsec\GM15416	scaffold_12	0	0.114214	CG14905-PA	3R	0	0.0264871	Dyak\GE26136	3R	0.0183337	0.0863171	Dyak\GE26136	3R	0.0112137	0.0451343	Dere\GG16817	scaffold_4770	0	0.120033	Dana\GF17068	scaffold_13340	0.00982785	0	Dpse\GA13343	2	9.81518	32.2257	Dper\GL24529	dper_scaffold_0	18.9786	46.6778	FBpp0284185-D1_1	Muller-E	10.6018	48.8891	Dwil\GK13857	dwil_scf2_1100000004943	0.0257199	0.37
beat-IIb	st5	3R	FBgn0038494	0	0.226491	Dsim\GD20241	Scf_3R	0	0.0729737	Dsec\GM15375	scaffold_12	0	0.273811	beat-IIb-PA	3R	0	0.188138	Dyak\GE24174	3R	0	0.0313355	Dyak\GE24174	3R	0	0	Dere\GG16782	scaffold_4770	0	0.0669059	Dana\GF16887	scaffold_13340	0	0.0306436	Dpse\GA17980	2	0.00944162	3.18521	Dper\GL23946	dper_scaffold_0	0.00668929	0.54629	FBpp0283639-D1_1	Muller-E	0	1.09418	Dwil\GK11458	dwil_scf2_1100000004902	0	0.038939
cpo	st2	3R	FBgn0263995	0.0215735	0.115787	Dsim\GD19192	Scf_3R	0.0701132	0.221109	Dsec\GM15269	scaffold_12	0.0263625	0.0502749	CG42457-PB	3R	0	0.0894429	Dyak\GE25503	3R	0.0037854	0.462512	Dyak\GE25503	3R	0.00518019	0.104198	Dere\GG22582	scaffold_4770	0.0238516	0.0725796	Dana\GF16747	scaffold_13340	0	0.1192	Dpse\GA16117	2	2.17671e+06	1.80935e+06	Dper\GL12579	dper_scaffold_6	0.0218151	0.164676	FBpp0284875-D1_1	Muller-E	1.15567e+06	3.7707e+06	Dwil\GK11234	dwil_scf2_1100000004902	0	0.0102577
cpo	st5	3R	FBgn0263995	0.0215735	0.115787	Dsim\GD19192	Scf_3R	0.0701132	0.221109	Dsec\GM15269	scaffold_12	0.0263625	0.0502749	CG42457-PB	3R	0	0.0894429	Dyak\GE25503	3R	0.0037854	0.462512	Dyak\GE25503	3R	0.00518019	0.104198	Dere\GG22582	scaffold_4770	0.0238516	0.0725796	Dana\GF16747	scaffold_13340	0	0.1192	Dpse\GA16117	2	2.17671e+06	1.80935e+06	Dper\GL12579	dper_scaffold_6	0.0218151	0.164676	FBpp0284875-D1_1	Muller-E	1.15567e+06	3.7707e+06	Dwil\GK11234	dwil_scf2_1100000004902	0	0.0102577
CG17029	st2	3L	FBgn0036551	0.700984	1.73227	Dsim\GD14583	Scf_3L	0.158607	0.700439	Dsec\GM25568	scaffold_0	11.6322	36.5638	CG17029-PA	3L	0	0.0532116									Dere\GG15938	scaffold_4784	0.11494	0.51797	Dana\GF24103	scaffold_13337	0.0384376	0.375202	Dpse\GA14281	XR_group8	1.21478	2.29085	Dper\GL12744	dper_scaffold_40	4.27695	4.4151					Dwil\GK24473	dwil_scf2_1100000004837	0.421343	1.1538
alpha-Est7	st2	3R	FBgn0015575	0	0.0814061	Dsim\GD19475	Scf_3R	0	0.0780589	Dsec\GM10474	scaffold_6	0.00811881	0.502838	alpha-Est7-PA	3R	0	0.300463	Dyak\GE14705	v2_chrUn_2510	0.00563858	0.259469	Dyak\GE14705	v2_chrUn_2510	0.0165392	0.110724	Dere\GG25127	scaffold_4770	0.00371776	36.8152	Dana\GF17298	scaffold_13340	0.0111425	13.7838	Dpse\GA10768	2	6.09689	3.71204	Dper\GL12171	dper_scaffold_6	4.03589	1.19643					Dwil\GK11077	dwil_scf2_1100000004902	0.19873	0.70014
CG12344	st5	2R	FBgn0033558	0.145361	2.38057					Dsec\GM20489	scaffold_1	0	0.631974	CG12344-PA	2R	0	0.56819	Dyak\GE13070	2R	0	0.193404	Dyak\GE13070	2R	0	0.308952	Dere\GG22713	scaffold_4845	0	0.118383	Dana\GF11081	scaffold_13266	2.92283	0.518963	Dpse\GA11569	3	0.436863	1.28731	Dper\GL17174	dper_scaffold_4	0.731966	4.93788	FBpp0278528-D1_1	Muller-C	0.0363573	1.94117	Dwil\GK23273	dwil_scf2_1100000004954	0.0123873	0.0838331
dtr	st5	2L	FBgn0023090	0.0898182	0.221516	Dsim\GD24320	Scf_2L	2.5084	2.48878	Dsec\GM23411	scaffold_18	3.6131	2.38852	dtr-PA	2L	1.38313	1.36873	Dyak\GE12915	2R	0.00426664	0.0108699	Dyak\GE12915	2R	0	0.41159	Dere\GG21300	scaffold_4845	0.00322535	0.212165	Dana\GF14329	scaffold_12916	0	0	Dpse\GA16341	4_group4	0.62991	7.76125	Dper\GL26663	dper_scaffold_10	1.37312	21.3023	FBpp0287855-D1_1	Muller-B	0.0396157	5.22172	Dwil\GK18740	dwil_scf2_1100000004884	0.00500941	0.0500594
Sas	st2	3R	FBgn0038045	0.0431736	0.534462	Dsim\GD18832	Scf_3R	0.0225321	0.266201	Dsec\GM24031	scaffold_0	0.109672	5.82038	Sas-PA	3R	0.0372413	1.48182	Dyak\GE26192	3R	0.0204853	0.0514363	Dyak\GE26192	3R	0.0150714	0	Dere\GG18905	scaffold_4770	0	0.247633	Dana\GF17956	scaffold_13340	0.0377265	0.323886	Dpse\GA18754	2	2.67402	7.37077	Dper\GL27311	dper_scaffold_19	0.00791889	0.238136	FBpp0283405-D1_1	Muller-E	7.02951	4.79197	Dwil\GK14403	dwil_scf2_1100000004943	0.00658483	0.605902
Sas	st5	3R	FBgn0038045	0.0431736	0.534462	Dsim\GD18832	Scf_3R	0.0225321	0.266201	Dsec\GM24031	scaffold_0	0.109672	5.82038	Sas-PA	3R	0.0372413	1.48182	Dyak\GE26192	3R	0.0204853	0.0514363	Dyak\GE26192	3R	0.0150714	0	Dere\GG18905	scaffold_4770	0	0.247633	Dana\GF17956	scaffold_13340	0.0377265	0.323886	Dpse\GA18754	2	2.67402	7.37077	Dper\GL27311	dper_scaffold_19	0.00791889	0.238136	FBpp0283405-D1_1	Muller-E	7.02951	4.79197	Dwil\GK14403	dwil_scf2_1100000004943	0.00658483	0.605902
GstD8	st2	3R	FBgn0010044	0.0758027	0.830486	Dsim\GD18821	Scf_3R	0.0445183	3.24285	Dsec\GM24021	scaffold_0	0	0.373654					Dyak\GE26181	3R	0	3.52279e-28	Dyak\GE26181	3R	0	0.697253	Dere\GG18806	scaffold_4770	0	1.64812	Dana\GF17947	scaffold_13340	0	1.14947	Dpse\GA18171	2	1.0389	5.00744	Dper\GL27303	dper_scaffold_19	2.51339	3.86862	FBpp0283395-D1_1	Muller-E	1.88929	4.66709	Dwil\GK11878	dwil_scf2_1100000004902	0	0.0383922
CG1648	st5	2R	FBgn0033446	0.00488535	0	Dsim\GD10052	Scf_2R	0	0.0448056	Dsec\GM20580	scaffold_1	0	0	CG1648-PB	2R	0	0.179181	Dyak\GE22072	2L	0	0	Dyak\GE22072	2L	0.0296216	0	Dere\GG25263	scaffold_4929	0.0245686	0.0643716	Dana\GF11480	scaffold_13266	0	0.0588118	Dpse\GA14072	3	0.0379518	4.84044	Dper\GL17447	dper_scaffold_4	0.0506013	0.964889	FBpp0277956-D1_1	Muller-C	0.0968974	2.3314	Dwil\GK15615	dwil_scf2_1100000004514	0.0271073	0.177756
CG13313	st2	3L	FBgn0035941	0.057093	0.070974	Dsim\GD14140	Scf_3L	0.086966	0.669286	Dsec\GM25105	scaffold_0	0.0395174	3.71455	CG13313-PA	3L	0.35832	2.03712	Dyak\GE20791	3L	0.813158	4.50686	Dyak\GE20791	3L	0.154663	1.21932	Dere\GG14360	scaffold_4784	0.0245259	0.434984	Dana\GF24366	scaffold_13337	0	0.1353	Dpse\GA12194	XR_group8	2.24844	6.71783	Dper\GL20729	dper_scaffold_29	5.50452	7.99885	FBpp0286247-D1_1	Muller-AD	4.49896	8.01948	Dwil\GK16749	dwil_scf2_1100000004511	0.00283801	0.463583
CG13313	st5	3L	FBgn0035941	0.057093	0.070974	Dsim\GD14140	Scf_3L	0.086966	0.669286	Dsec\GM25105	scaffold_0	0.0395174	3.71455	CG13313-PA	3L	0.35832	2.03712	Dyak\GE20791	3L	0.813158	4.50686	Dyak\GE20791	3L	0.154663	1.21932	Dere\GG14360	scaffold_4784	0.0245259	0.434984	Dana\GF24366	scaffold_13337	0	0.1353	Dpse\GA12194	XR_group8	2.24844	6.71783	Dper\GL20729	dper_scaffold_29	5.50452	7.99885	FBpp0286247-D1_1	Muller-AD	4.49896	8.01948	Dwil\GK16749	dwil_scf2_1100000004511	0.00283801	0.463583
CG8500	st5	3R	FBgn0037754	0.0206148	0.241898					Dsec\GM23841	scaffold_0	0.0395144	0.282032	CG8500-PA	3R	0.120854	0.343034	Dyak\GE25990	3R	0.0163233	0.0281021	Dyak\GE25990	3R	0.351012	0.0603064	Dere\GG17169	scaffold_4770	14.5558	21.062	Dana\GF17842	scaffold_13340	0.148936	0.344682	Dpse\GA21121	2	0.902613	3.49376	Dper\GL24310	dper_scaffold_0	0.908157	2.46645					Dwil\GK11969	dwil_scf2_1100000004902	0.0370894	0.171326
CG14857	st5	3R	FBgn0038262	0	0.0746419	Dsim\GD18977	Scf_3R	0	3.26152	Dsec\GM24186	scaffold_0	0	0.0333282	CG14857-PA	3R	7.25294e-14	0.17249	Dyak\GE24256	3R	0.0216639	6.07284	Dyak\GE24256	3R	0	0	Dere\GG16877	scaffold_4770	0	0.0821586	Dana\GF16894	scaffold_13340	0.0310721	0.283041	Dpse\GA13299	2	0.0143503	1.54651									Dwil\GK13460	dwil_scf2_1100000004943	0	0.051354
CG42788	st5	3R	FBgn0261859	8.94483	1.08731	Dsim\GD20384	Scf_3R	17.1367	1.30134	Dsec\GM25808	scaffold_0	21.4346	0.839914					Dyak\GE26413	3R	2.84138	0.50933	Dyak\GE26413	3R	1.26938	0.306886	Dere\GG20924	scaffold_4770	10.7254	3.25833	Dana\GF17163	scaffold_13340	0.00647092	0.0263666	Dpse\GA30185	2	2.20264	1.23117e+06	Dper\GL21692	dper_scaffold_3	5.26964	1.9414	FBpp0300585-D1_1	Muller-E	5.34027	1.70664	Dwil\GK13984	dwil_scf2_1100000004943	0.577904	0.281327
Phlpp	st5	2L	FBgn0032749	0.0174585	0.139037	Dsim\GD24180	Scf_2L	0.00616785	0.122457	Dsec\GM17320	scaffold_7	0.0199009	0.129783	Phlpp-PA	2L	0	0.155168	Dyak\GE13228	2R	0	0.0846198	Dyak\GE13228	2R	0.049874	0.533985	Dere\GG21156	scaffold_4845	0	0.0562106	Dana\GF14696	scaffold_12916	1.03848	0.124244	Dpse\GA10351	4_group1	9.05274	7.74349	Dper\GL26161	dper_scaffold_5	6.91946	9.19632					Dwil\GK24171	dwil_scf2_1100000004585	0.00316929	0.00838083
CRMP	st5	3R	FBgn0023023	0.115736	1.75059	Dsim\GD19795	Scf_3R	0.0753217	0.383413	Dsec\GM10816	scaffold_6	0.0667983	0.315561	CRMP-PE	3R	0	0.357426	Dyak\GE10139	3R	0.014208	1.29364	Dyak\GE10139	3R	0.0493212	1.06508	Dere\GG12914	scaffold_4770	0.00543082	2.25867	Dana\GF20697	scaffold_13088	0	0.228332	Dpse\GA12765	2	0.0507162	3.79568	Dper\GL22308	dper_scaffold_3	0.020571	0.778013	FBpp0284571-D1_1	Muller-E	5.86155	26.2684	Dwil\GK22508	dwil_scf2_1100000004921	0.0405801	0.698137
RhoGAP16F	st2	X	FBgn0030893	0.538969	4.23148	Dsim\GD17385	Scf_X	0.0434988	0.923471	Dsec\GM22879	scaffold_8	1.25796	6.44858	RhoGAP16F-PA	X	0.891057	3.25654	Dyak\GE17708	X	1.36797	2.1535	Dyak\GE17708	X	0.086339	4.52795	Dere\GG19148	scaffold_4690	0.119825	0.00920729	Dana\GF19370	scaffold_13335	0.0343945	0.0451107	Dpse\GA22233	XL_group1e	6.25548	5.423	Dper\GL14947	dper_scaffold_21	1.00795	0.117219	FBpp0272058-D1_1	Muller-A	7.14546	1.1804	Dwil\GK20070	dwil_scf2_1100000004515	0.0312138	0.0227253
dpr14	st5	X	FBgn0029974	0.0845923	0.0805285	Dsim\GD16142	Scf_X	0.0806168	0.0608113	Dsec\GM11964	scaffold_50	0.0323037	0	dpr14-PA	X	22.4868	11.7273	Dyak\GE17499	X	0.511286	0.0581892	Dyak\GE17499	X	0	0	Dere\GG17599	scaffold_4690	0.22889	0.0684664	Dana\GF21092	scaffold_13117	7.26821	0.757633	Dpse\GA10658	XL_group1e	5.42414	6.38105	Dper\GL18221	dper_scaffold_30	0.890673	1.71935	FBpp0285318-D1_1	Muller-A	10.4877	23.09	Dwil\GK25014	dwil_scf2_1100000004909	0	0.013796
NnaD	st5	X	FBgn0265726	0.0778937	0.47784	Dsim\GD17141	Scf_X	0.0119689	0.0504688	Dsec\GM17631	scaffold_20	27.191	8.88461	NnaD-PA	X	0.252598	0.0282242	Dyak\GE17101	X	0.00415737	0.0189979	Dyak\GE17101	X	0	0	Dere\GG17805	scaffold_4690	0.00926519	0	Dana\GF22597	scaffold_13248	0.0104566	0.0927141	Dpse\GA17027	XL_group1e	6.69508e-110	1.77411	Dper\GL19861	dper_scaffold_18	25.78	22.6513	FBpp0285926-D1_1	Muller-A	0.41528	1.33106	Dwil\GK25816	dwil_scf2_1100000004909	0.00423025	0.00602174
CG17646	st5	2L	FBgn0264494	2.10832	0.154563	Dsim\GD23112	Scf_2L	5.20251	0.330508	Dsec\GM16832	scaffold_14	15.109	0.526828	CG17646-PB	2L	8.06511	9.70407	Dyak\GE17714	2L	9.63307	0.0351197	Dyak\GE17714	2L	14.1067	0.0908689	Dere\GG24808	scaffold_4929	9.5876	0.0369441	Dana\GF14008	scaffold_12916	22.71	0.628205	Dpse\GA14594	4_group3	15.0092	1.61774	Dper\GL19654	dper_scaffold_1	15.4674	1.01829	FBpp0280788-D1_1	Muller-B	15.5829	3.32287
CG1632	st5	X	FBgn0030027	0	0.0581345	Dsim\GD16890	Scf_X	0	0.0579579	Dsec\GM21485	scaffold_35	0	0.525162	CG1632-PA	X	0	0.220662	Dyak\GE15774	X	0.0565733	0.222975	Dyak\GE15774	X	0.865669	0.220482	Dere\GG19309	scaffold_4690	1.95801	0.413945	Dana\GF22489	scaffold_13248	0.00493443	0.0936011	Dpse\GA14059	XL_group1e	0.850708	4.27207	Dper\GL19813	dper_scaffold_18	0.262054	11.6022	FBpp0283960-D1_1	Muller-A	0.00525821	1.87183	Dwil\GK16289	dwil_scf2_1100000004590	0.518042	0.148488
Mco1	st5	2L	FBgn0032116	0	1.36988	Dsim\GD23601	Scf_2L	0	0.214179	Dsec\GM17445	scaffold_3	0.00481513	0.880055	CG3759-PA	2L	0	0.260078	Dyak\GE18838	2L	0.10329	14.1566	Dyak\GE18838	2L	0	0.29321	Dere\GG25346	scaffold_4929	0	0.276224	Dana\GF22730	scaffold_12943	0	0.0782431	Dpse\GA17667	4_group1	0.00287923	1.20416	Dper\GL26146	dper_scaffold_5	0.00129998	4.12946	FBpp0279135-D1_1	Muller-B	0.00814699	20.3778	Dwil\GK24202	dwil_scf2_1100000004585	0.00381529	0.0328442
Cyp6t1	st5	X	FBgn0031182	7.91358	0.130649	Dsim\GD24431	Scf_X	0.68266	0.0282959	Dsec\GM22614	scaffold_8	0	0.416442	Cyp6t1-PA	X	11.2135	1.21219	Dyak\GE15290	X	4.44706	0.221317	Dyak\GE15290	X	8.08699	0.468362					Dana\GF15567	scaffold_12916	0	0.104633	Dpse\GA28828	4_group4	0.0948108	3.47157	Dper\GL26358	dper_scaffold_10	0.00237622	2.15526	FBpp0287453-D1_1	Muller-B	13.7482	37.158	Dwil\GK18681	dwil_scf2_1100000004884	0.108952	0.150395
CG2837	st5	2L	FBgn0031646	0.0107926	0.835986	Dsim\GD22682	Scf_2L	0	0.0526104	Dsec\GM18064	scaffold_5	0	0.205713	CG2837-PA	2L	0	1.36185	Dyak\GE18722	2L	0	0	Dyak\GE18722	2L	0	0	Dere\GG24344	scaffold_4929	0.0172525	0.159741	Dana\GF21548	scaffold_12943	0	0	Dpse\GA15478	4_group3	0.0480564	7.24448	Dper\GL19494	dper_scaffold_1	0	1.20691	FBpp0280620-D1_1	Muller-B	0	2.27707	Dwil\GK24591	dwil_scf2_1100000004585	0	0.0435144
CG31272	st2	3R	FBgn0051272	0.0259763	1.10067	Dsim\GD20707	Scf_3R	0.0131187	1.67775	Dsec\GM26154	scaffold_0	0	0.532015	CG31272-PA	3R	4.80688	14.9492	Dyak\GE24671	3R	0.0112977	0.0598918	Dyak\GE24671	3R	3.54511	8.65976	Dere\GG17270	scaffold_4770	0	0.183016	Dana\GF17439	scaffold_13340	0.108872	1.28222	Dpse\GA16141	2	4.76815	33.0064	Dper\GL12623	dper_scaffold_6	4.6423	49.5514	FBpp0284919-D1_1	Muller-E	4.54268	25.7265
CG11670	st5	3R	FBgn0038114	0.0541673	0.165854	Dsim\GD18877	Scf_3R	0.334741	0.411718	Dsec\GM24081	scaffold_0	3.10844	7.15248	CG11670-PE	3R	0.167208	0.425132	Dyak\GE26238	3R	0.0873159	0.0961395	Dyak\GE26238	3R	0.282647	0.100517	Dere\GG19401	scaffold_4770	0.168248	0.544435	Dana\GF17570	scaffold_13340	0.222423	0.784843	Dpse\GA11133	2	1.75038	3.78621	Dper\GL24386	dper_scaffold_0	1.50811	1.49463	FBpp0292657-D1_1	Muller-E	4.34667	16.2509	Dwil\GK12228	dwil_scf2_1100000004902	9.60313	0.490943
CG3790	st5	2R	FBgn0033778	0.238349	1.0961	Dsim\GD25806	Scf_2R	1.97893e-129	0.100664	Dsec\GM20329	scaffold_1	0.139557	0.0615029	CG3790-PA	2R	0.34471	0.411136	Dyak\GE13414	2R	0.413109	0.752488	Dyak\GE13414	2R	0.850132	0.676809	Dere\GG22544	scaffold_4845	0.0407372	0.719388	Dana\GF12000	scaffold_13266	0.0106425	0.184004	Dpse\GA17687	3	3.14152	14.6016	Dper\GL17452	dper_scaffold_4	2.03355	15.2042					Dwil\GK20880	dwil_scf2_1100000004510	0.279346	0.076982
Task7	st5	3R	FBgn0037690	0.491277	0.607596	Dsim\GD20797	Scf_3R	0.0564652	0.0878945					Task7-PA	3R	0	0.403828	Dyak\GE24778	3R	0	1.62311	Dyak\GE24778	3R	0	0.934848	Dere\GG17373	scaffold_4770	0	0.0558518	Dana\GF17764	scaffold_13340	0.552183	0.452806	Dpse\GA21730	2	0.0209311	1.80013	Dper\GL13670	dper_scaffold_7	0	0.245878	FBpp0283261-D1_1	Muller-E	0.213858	1.4835	Dwil\GK12131	dwil_scf2_1100000004902	0	0.080407
drd	st2	X	FBgn0260006	0.0274352	0.17829	Dsim\GD24816	Scf_X	0.0404978	0.0786794	Dsec\GM12060	scaffold_32	0.174418	0.876897	drd-PA	X	0.00801596	0.481964	Dyak\GE17168	X	0.0117377	0.0683572	Dyak\GE17168	X	0.0441273	0.876604	Dere\GG17865	scaffold_4690	0.0196392	4.34439	Dana\GF21223	scaffold_13117	0.0837656	0.139071	Dpse\GA24043	Unknown_singleton_3944	6.20709	12.3276	Dper\GL15183	dper_scaffold_28	7.52534	12.2605					Dwil\GK16190	dwil_scf2_1100000004590	0.0319585	0.0190783
drd	st5	X	FBgn0260006	0.0274352	0.17829	Dsim\GD24816	Scf_X	0.0404978	0.0786794	Dsec\GM12060	scaffold_32	0.174418	0.876897	drd-PA	X	0.00801596	0.481964	Dyak\GE17168	X	0.0117377	0.0683572	Dyak\GE17168	X	0.0441273	0.876604	Dere\GG17865	scaffold_4690	0.0196392	4.34439	Dana\GF21223	scaffold_13117	0.0837656	0.139071	Dpse\GA24043	Unknown_singleton_3944	6.20709	12.3276	Dper\GL15183	dper_scaffold_28	7.52534	12.2605					Dwil\GK16190	dwil_scf2_1100000004590	0.0319585	0.0190783
CG33003	st5	2L	FBgn0053003	0	0.187445	Dsim\GD23284	Scf_2L	0.00668746	0.102829	Dsec\GM18470	scaffold_5	0.0169356	0.0574618	CG33003-PB	2L	0.0140247	0.306927	Dyak\GE18286	2L	0	0.0296696	Dyak\GE18286	2L	0.0189935	0.0814832	Dere\GG25000	scaffold_4929	1.59955e-135	0.0874288	Dana\GF21178	scaffold_12943	0	0.0447395	Dpse\GA17232	4_group3	0	1.59755	Dper\GL15122	dper_scaffold_8	0	3.18663e-189	FBpp0279571-D1_1	Muller-B	0.00964992	1.34288	Dwil\GK24347	dwil_scf2_1100000004585	0.00563646	0.458948
Oseg2	st5	3L	FBgn0035317	0	0.117994	Dsim\GD13668	Scf_3L	0.0132605	0.0584802	Dsec\GM14469	scaffold_2	0.00946106	0.0173878	osm-1-PA	3L	0.00343015	0.0562756	Dyak\GE21208	3L	0.30471	1.25102	Dyak\GE21208	3L	0	0.112408	Dere\GG14844	scaffold_4784	0.62269	4.22986e-238	Dana\GF24855	scaffold_13337	0	0.0979513	Dpse\GA12544	XR_group6	0.975887	5.00336	Dper\GL24638	dper_scaffold_33	0.00420845	0.206183	FBpp0275523-D1_1	Muller-AD	0.722609	4.82644	Dwil\GK12534	dwil_scf2_1100000004729	0.00140186	0.496163
CG14696	st2	3R	FBgn0037853	0.0432188	0.569853	Dsim\GD20691	Scf_3R	1.5422	0.173276	Dsec\GM26137	scaffold_0	0.0192596	0.0370535	CG14696-PA	3R	0.0759429	0.199178	Dyak\GE24655	3R	0.00904297	0.347964	Dyak\GE24655	3R	0.0644076	0.351173	Dere\GG17253	scaffold_4770	0.0491754	0.256187	Dana\GF16171	scaffold_13340	0	0.024675	Dpse\GA26179	2	1.00799	0.887962	Dper\GL12057	dper_scaffold_6	4.36487	1.38662					Dwil\GK13284	dwil_scf2_1100000004943	0.0408274	2.61457
slx1	st2	3R	FBgn0037263	6.23833	18.4909	Dsim\GD17776	Scf_3R	6.02697	10.6682	Dsec\GM10768	scaffold_6	2.94346e-31	3.67531e-30	CG18271-PB	3R	1.38848e-38	4.32653e-27									Dere\GG12527	scaffold_4770	9.02275e-65	0.928133	Dana\GF16665	scaffold_13340	8.8874e-60	4.57404e-31	Dpse\GA27368	2	3.22014	26.9027	Dper\GL22073	dper_scaffold_3	1.06912	19.8967	FBpp0284332-D1_1	Muller-E	5.4847	109.262	Dwil\GK19194	dwil_scf2_1100000004902	9.9675e-34	3.94501e-22
slx1	st5	3R	FBgn0037263	6.23833	18.4909	Dsim\GD17776	Scf_3R	6.02697	10.6682	Dsec\GM10768	scaffold_6	2.94346e-31	3.67531e-30	CG18271-PB	3R	1.38848e-38	4.32653e-27									Dere\GG12527	scaffold_4770	9.02275e-65	0.928133	Dana\GF16665	scaffold_13340	8.8874e-60	4.57404e-31	Dpse\GA27368	2	3.22014	26.9027	Dper\GL22073	dper_scaffold_3	1.06912	19.8967	FBpp0284332-D1_1	Muller-E	5.4847	109.262	Dwil\GK19194	dwil_scf2_1100000004902	9.9675e-34	3.94501e-22
CG10035	st2	3R	FBgn0038028	0.513182	3373.36	Dsim\GD20576	Scf_3R	0.545493	3245.37	Dsec\GM26018	scaffold_0	0.957582	2309.86	CG10035-PA	3R	0.957304	3347.36	Dyak\GE24526	3R	0.692966	2954.89	Dyak\GE24526	3R	0.433079	4315.63	Dere\GG17134	scaffold_4770	0.889007	3502.15	Dana\GF17050	scaffold_13340	0.622254	5667.92	Dpse\GA10022	2	1.1884	4055.24	Dper\GL27183	dper_scaffold_19	0	5792.66	FBpp0282630-D1_1	Muller-E	1.84445	3099.71	Dwil\GK11199	dwil_scf2_1100000004902	0	2673
hoe2	st5	2L	FBgn0031649	0	0.120473	Dsim\GD11986	Scf_2L	0	0.0488614	Dsec\GM18062	scaffold_5	0.00538167	0.0594808	hoe2-PA	2L	0	0	Dyak\GE18720	2L	0.00218863	0.0321372	Dyak\GE18720	2L	0	0.108095	Dere\GG24341	scaffold_4929	0	0.417949	Dana\GF21544	scaffold_12943	0	0	Dpse\GA13854	4_group3	0.0162764	1.63092	Dper\GL19492	dper_scaffold_1	3.16501	19.0172	FBpp0280618-D1_1	Muller-B	0.013141	4.37127	Dwil\GK24588	dwil_scf2_1100000004585	0	0.0078808
CG32091	st5	3L	FBgn0052091	0.0201951	0.204813					Dsec\GM25287	scaffold_0	0	4.18442	CG32091-PB	3L	0	0.590976	Dyak\GE21833	3L	0	0.527253	Dyak\GE21833	3L	0	0.0555206	Dere\GG15518	scaffold_4784	0	4.06967	Dana\GF25279	scaffold_13337	0	0.0827903	Dpse\GA16671	XR_group6	0.665397	1.69662									Dwil\GK12677	dwil_scf2_1100000004729	22.2666	1.41656
sals	st2	3R	FBgn0051374	0.011242	0.19461	Dsim\GD20658	Scf_3R	1.03992	1.11392	Dsec\GM26097	scaffold_0	0.30588	0.321029	sals-PC	3R	0.185299	0.249227	Dyak\GE24619	3R	0.320967	0.312052	Dyak\GE24619	3R	0.298088	0.272226	Dere\GG17220	scaffold_4770	0.179495	0.614495	Dana\GF16644	scaffold_13340	0.203269	0.165693	Dpse\GA16219	2	1.1079	0.593511	Dper\GL12270	dper_scaffold_6	0.755233	0.397848	FBpp0301089-D1_1	Muller-E	1.36164	0.271668	Dwil\GK11792	dwil_scf2_1100000004902	0.287655	0.317713
CG4297	st2	2L	FBgn0031258	0.223351	0.064103					Dsec\GM16666	scaffold_14	1.74834	0.0983696	CG4297-PB	2L	3.37881	0.0705822	Dyak\GE16095	2L	0.00305496	0.221073	Dyak\GE16095	2L	0.00392136	0.190323	Dere\GG24647	scaffold_4929	0	0.0193251	Dana\GF24762	scaffold_12943	0	0.0148312	Dpse\GA25890	4_group3	5.05649	0.236552	Dper\GL19260	dper_scaffold_1	2.82474	0.195546	FBpp0280375-D1_1	Muller-B	2.5866	0.153198	Dwil\GK24650	dwil_scf2_1100000004585	0.334224	0.0944544
CG10005	st5	3R	FBgn0037972	0.72978	1.03152	Dsim\GD20617	Scf_3R	1.38681	0.201035	Dsec\GM26054	scaffold_0	0.949328	0.572716	CG10005-PA	3R	2.30317	1.30735	Dyak\GE24564	3R	19.1347	7.43933	Dyak\GE24564	3R	1.18759	0.560572	Dere\GG17174	scaffold_4770	0.677986	0.272548	Dana\GF23187	scaffold_12911	0.202108	0.856538	Dpse\GA10003	2	0.436219	3.18702	Dper\GL21589	dper_scaffold_3	0.0596209	3.47744	FBpp0281482-D1_1	Muller-E	1.47694	1.57838	Dwil\GK11672	dwil_scf2_1100000004902	0.237384	0.764347
foxo	st5	3R	FBgn0038197	20.4177	0.106901	Dsim\GD18943	Scf_3R	17.3176	0.0571248	Dsec\GM24148	scaffold_0	21.761	0.229981	foxo-PF	3R	14.4595	0.130398	Dyak\GE24216	3R	11.1564	0.0295889	Dyak\GE24216	3R	11.9112	0.422815	Dere\GG16833	scaffold_4770	10.9751	0.0741373	Dana\GF16233	scaffold_13340	7.64567	0.0915535	Dpse\GA16248	2	12.9419	2.06569	Dper\GL24235	dper_scaffold_0	12.7416	1.57263	FBpp0282082-D1_1	Muller-E	12.0054	1.51405	Dwil\GK22687	dwil_scf2_1100000004921	26.9821	0.433901
exp	st5		FBgn0033668			Dsim\GD10827	Scf_2R	0	0.012722	Dsec\GM21319	scaffold_1	0.155029	1.66422					Dyak\GE12392	2R	0	0.0252699	Dyak\GE12392	2R	1.64231	13.6495	Dere\GG20231	scaffold_4845	0	0.0238059	Dana\GF13107	scaffold_13266	0	0.076353	Dpse\GA25074	3	1.57142	2.29372	Dper\GL10094	dper_scaffold_31	5.55336	2.92883	FBpp0306306-D1_1	Muller-C	0.489577	2.13354	Dwil\GK22050	dwil_scf2_1100000004558	0.00283218	0.033826
3L	0.16129	20	AD	AD	#REF!	ZYG	3L	0	AD	#DIV/0!	MAT	3L	0					AD	#DIV/0!	ZYG+STRONG	3L					#REF!	AD		MAT+STRONG	3L	#REF!	AD											17
X	0.153226	19			#REF!		X	0		#DIV/0!		X	0						#DIV/0!		X					#REF!				X	#REF!
2R	0.112903	14	C	C	#REF!		2R	0	C	#DIV/0!		2R	0					C	#DIV/0!		2R					#REF!	C			2R	#REF!	C
3R	0.395161	49			#REF!		3R	0		#DIV/0!		3R	0						#DIV/0!		3R					#REF!				3R	#REF!
2L	0.177419	22			#REF!		2L	0		#DIV/0!		2L	0						#DIV/0!		2L					#REF!				2L	#REF!
1 to 0
SCAP	st5	2R	FBgn0033052	23.5371	5.67226	Dsim\GD15314	Scf_2R	41.9769	241.007					SCAP-PA	2R	25.4635	5.33711	Dyak\GE19432	2L	36.2619	8.18427	Dyak\GE19432	2L	35.1683	4.10107	Dere\GG10838	scaffold_4929	17.5486	3.1316	Dana\GF13825	scaffold_13266	12.8966	2.63626	Dpse\GA17307	3	20.1765	1.05299	Dper\GL17785	dper_scaffold_4	49.4798	2.59558	FBpp0278210-D1_1	Muller-C	19.9919	0.59663	Dwil\GK22004	dwil_scf2_1100000004513	49.8197	2.12966
rgn	st5	3L	FBgn0261258	0.248952	1.2509	Dsim\GD14957	Scf_3L	0.0390276	0.249622	Dsec\GM22365	scaffold_11	1.85552	2.70104	rgn-PA	3L	2.21456	0.811366	Dyak\GE19753	3L	12.1281	11.7202	Dyak\GE19753	3L	11.4137	23.1701	Dere\GG16182	scaffold_4784	1.95029	1.97566	Dana\GF10282	scaffold_13337	0.850983	4.48123	Dpse\GA23950	XR_group6	0.959469	0.952689	Dper\GL24685	dper_scaffold_33	0.801705	1.15381	FBpp0275565-D1_1	Muller-AD	0.40487	0.324989	Dwil\GK20475	dwil_scf2_1100000004768	6.95905	24.1484
CG31068	st5	3R	FBgn0051068	0.0569952	4.64368					Dsec\GM10378	scaffold_13	0.00561658	4.13912	CG31068-PC	3R	0	4.25854	Dyak\GE23724	3R	0	6.00005	Dyak\GE23724	3R	0	7.30844	Dere\GG11536	scaffold_4820	0	7.43668	Dana\GF16277	scaffold_13340	0	2.24173	Dpse\GA15982	2	0.00281439	0.792781	Dper\GL24479	dper_scaffold_0	0	1.79595	FBpp0282321-D1_1	Muller-E	0.00247426	0.893961	Dwil\GK19114	dwil_scf2_1100000004921	0.00335336	2.83221
CG7912	st5	3R	FBgn0039736	0.0210755	0.518535	Dsim\GD17465	Scf_3R	0	2.75147	Dsec\GM12195	scaffold_4	0.0201911	1.27588	CG7912-PA	3R	0	1.93486	Dyak\GE23427	3R	5.64012	3.3405	Dyak\GE23427	3R	0	2.7573	Dere\GG11977	scaffold_4820	0.00921577	2.20916	Dana\GF16211	scaffold_13340	15.6885	58.5608	Dpse\GA20680	2	0.00629216	0.825708	Dper\GL13488	dper_scaffold_7	0.0278765	1.01461e-12	FBpp0282932-D2_1	Muller-C	0.00697508	0.894592	Dwil\GK13374	dwil_scf2_1100000004943	0.00473847	2.72167
CG10338	st5	2L	FBgn0032700	15.421	21.1107	Dsim\GD24150	Scf_2L	17.229	5.69391	Dsec\GM17287	scaffold_7	21.14	12.1716	CG10338-PA	2L	22.5117	14.0472	Dyak\GE13200	2R	35.9692	49.1849	Dyak\GE13200	2R	16.2939	9.57004	Dere\GG21126	scaffold_4845	16.6475	41.4792	Dana\GF15067	scaffold_12916	17.9105	6.9719	Dpse\GA10253	4_group3	18.5514	1.50384	Dper\GL19630	dper_scaffold_1	16.653	0.779503					Dwil\GK24688	dwil_scf2_1100000004585	11.5394	10.8096
CG6678	st5	3R	FBgn0038917	4.66487	0.52352	Dsim\GD20908	Scf_3R	12.5735	3.86815	Dsec\GM26385	scaffold_0	24.8715	5.78266	CG6678-PA	3R	6.96148	2.41583	Dyak\GE10252	3R	14.5277	4.6593	Dyak\GE10252	3R	10.9084	0.776999	Dere\GG11092	scaffold_4820	5.10328	1.88043	Dana\GF18053	scaffold_13340	19.3456	5.2379	Dpse\GA19773	2	10.8688	0.441257	Dper\GL23803	dper_scaffold_0	6.3438	1.05218	FBpp0283500-D1_1	Muller-E	13.8404	0.237344	Dwil\GK14234	dwil_scf2_1100000004943	8.82674	3.76368
CG1847	st5	X	FBgn0030345	15.829	3.06311	Dsim\GD17053	Scf_X	21.0517	1.45043	Dsec\GM13115	scaffold_36	35.3872	1.07697	CG1847-PB	X	20.9834	1.33118	Dyak\GE15671	X	32.2806	5.59294	Dyak\GE15671	X	38.2166	6.37808	Dere\GG18449	scaffold_4690	27.3288	9.74814	Dana\GF21573	scaffold_12948	24.0403	12.2064	Dpse\GA14946	XL_group1e	28.1705	0.239637	Dper\GL20154	dper_scaffold_17	32.2668	0.206914	FBpp0282338-D1_1	Muller-A	44.2705	0.25246	Dwil\GK25427	dwil_scf2_1100000004909	32.4035	3.05292
cdi	st5	3R	FBgn0004876	34.0105	4.28086	Dsim\GD20136	Scf_3R	35.5635	3.83216	Dsec\GM23341	scaffold_77	39.2648	2.84092	cdi-PA	3R	44.3684	2.14859	Dyak\GE25154	3R	45.6825	5.28837	Dyak\GE25154	3R	45.0952	3.87161	Dere\GG16197	scaffold_4770	36.6856	8.39323	Dana\GF16418	scaffold_13340	14.0482	1.83311	Dpse\GA19308	2	12.4391	1.14887	Dper\GL23714	dper_scaffold_0	22.259	1.95269	FBpp0282505-D1_1	Muller-E	12.6334	0.853581	Dwil\GK13716	dwil_scf2_1100000004943	32.7492	7.03794
Scgbeta	st5	3R	FBgn0038042	0	1.2885	Dsim\GD20569	Scf_3R	0.054983	0.278517	Dsec\GM26011	scaffold_0	0	0.438501	Scgbeta-PA	3R	3.83762	4.7032	Dyak\GE24519	3R	0.512034	2.42601	Dyak\GE24519	3R	0.319525	1.24262	Dere\GG17128	scaffold_4770	5.6542	5.8424	Dana\GF17045	scaffold_13340	2.63619	4.05297	Dpse\GA19038	2	0.0423526	0.169062	Dper\GL27177	dper_scaffold_19	2.8497	8.88626	FBpp0282624-D1_1	Muller-E	0.146959	0.89617	Dwil\GK12845	dwil_scf2_1100000004943	0.023627	6.9304
CG42240	st2	X	FBgn0250869	83.0551	11.8538	Dsim\GD24755	Scf_X	80.7151	14.0113	Dsec\GM12482	scaffold_4	80.6136	37.6996					Dyak\GE16745	X	98.2072	27.6305	Dyak\GE16745	X	57.3263	37.5732	Dere\GG19586	scaffold_4690	54.7283	9.45299	Dana\GF20917	scaffold_13117	14.0333	14.0096	Dpse\GA22636	XL_group1a	9.69541e-07	1.865e-05	Dper\GL19985	dper_scaffold_10206	56.5957	9.71888	FBpp0272724-D1_1	Muller-A	2.85627e-212	1.87085e-141	Dwil\GK19883	dwil_scf2_1100000004515	17.8108	44.664
CG42240	st5	X	FBgn0250869	83.0551	11.8538	Dsim\GD24755	Scf_X	80.7151	14.0113	Dsec\GM12482	scaffold_4	80.6136	37.6996					Dyak\GE16745	X	98.2072	27.6305	Dyak\GE16745	X	57.3263	37.5732	Dere\GG19586	scaffold_4690	54.7283	9.45299	Dana\GF20917	scaffold_13117	14.0333	14.0096	Dpse\GA22636	XL_group1a	9.69541e-07	1.865e-05	Dper\GL19985	dper_scaffold_10206	56.5957	9.71888	FBpp0272724-D1_1	Muller-A	2.85627e-212	1.87085e-141	Dwil\GK19883	dwil_scf2_1100000004515	17.8108	44.664
CG18094	st2	2L	FBgn0032791	6.74588	15.0277	Dsim\GD24212	Scf_2L	8.76351	4.6252	Dsec\GM17354	scaffold_7	9.86412	15.5044	CG18094-PA	2L	14.3125	10.1857	Dyak\GE13260	2R	15.8636	3.10074	Dyak\GE13260	2R	3.29475	0.583161	Dere\GG21188	scaffold_4845	6.15024	6.56021	Dana\GF14240	scaffold_12916	15.4324	21.3903	Dpse\GA28769	4_group4	0.651167	1.49395	Dper\GL21217	dper_scaffold_16	0.63665	0.842813					Dwil\GK18187	dwil_scf2_1100000004577	3.96387	2.73336
CG11275	st5	2R	FBgn0034706	0.283448	3.66203	Dsim\GD15448	Scf_2R	0.286438	1.11167	Dsec\GM15891	scaffold_9	0.773694	2.97144	CG11275-PA	2R	0.830124	4.74624	Dyak\GE14163	2R	0	2.57034	Dyak\GE14163	2R	0.0309786	3.07462	Dere\GG22171	scaffold_4845	0.0107294	5.11726	Dana\GF11653	scaffold_13266	0.471959	2.49245	Dpse\GA10882	3	0.302887	0.621229	Dper\GL11783	dper_scaffold_37	6.41743	3.35072	FBpp0275747-D1_1	Muller-C	0.933924	0.250442	Dwil\GK19642	dwil_scf2_1100000004512	0.575025	3.42627
GlyP	st5	2L	FBgn0004507	134.961	3.5407	Dsim\GD23132	Scf_2L	127.304	1.08035	Dsec\GM23707	scaffold_121	173.604	6.68902	GlyP-PA	2L	110.849	7.28689	Dyak\GE17935	2L	151.012	15.8339	Dyak\GE17935	2L	151.49	15.6304	Dere\GG24830	scaffold_4929	112.49	0.906645	Dana\GF14601	scaffold_12916	48.2926	7.66826	Dpse\GA20213	4_group3	87.7785	1.10961	Dper\GL18703	dper_scaffold_1	107.855	1.98108	FBpp0280006-D1_1	Muller-B	94.931	0.738439	Dwil\GK15132	dwil_scf2_1100000004521	110.143	18.8713
Sec15	st5	3R	FBgn0266674	26.5417	9.10855	Dsim\GD20007	Scf_3R	22.2287	2.33725	Dsec\GM15101	scaffold_38	22.9723	2.10321	sec15-PA	3R	23.2407	2.45589	Dyak\GE25017	3R	51.7744	1.46655	Dyak\GE25017	3R	45.7335	0.560753	Dere\GG14883	scaffold_4770	32.0136	2.49044	Dana\GF18516	scaffold_13340	24.341	9.46503	Dpse\GA20047	2	14.1827	0.48192	Dper\GL22033	dper_scaffold_3	14.2893	0.766084	FBpp0284287-D1_1	Muller-E	21.8907	0.169984	Dwil\GK13077	dwil_scf2_1100000004943	17.3985	4.29951
Sik3	st2	2R	FBgn0262103	17.069	0.310991	Dsim\GD11404	Scf_2R	18.8455	0.550435	Dsec\GM21909	scaffold_1	7.61556	0.189403	CG42856-PB	2R	18.8276	1.05095	Dyak\GE11993	2R	11.5364	0.0702926	Dyak\GE11993	2R	9.89447	0.197282	Dere\GG21918	scaffold_4845	8.26337	0.00468297	Dana\GF12121	scaffold_13266	2.6461	0.0722804	Dpse\GA24477	3	0.0375692	0.348216	Dper\GL10765	dper_scaffold_2	1.61211	0.157504	FBpp0276933-D1_1	Muller-C	0.000745143	0.176763	Dwil\GK20918	dwil_scf2_1100000004510	4.33441	0.187278
CG14879	st2	3R	FBgn0038419	0.420314	1.90677	Dsim\GD20298	Scf_3R	0.722542	2.00713	Dsec\GM15443	scaffold_12	0.290626	1.23341	CG14879-PA	3R	4.50625	5.04668	Dyak\GE26322	3R	5.95775	5.3895	Dyak\GE26322	3R	8.41908	14.123	Dere\GG20048	scaffold_4770	17.9847	7.23848	Dana\GF16524	scaffold_13340	37.6832	108.951	Dpse\GA13315	2	0.158091	0.0274169	Dper\GL22248	dper_scaffold_3	0.0109269	0	FBpp0284510-D1_1	Muller-E	0.447512	0.240243	Dwil\GK13510	dwil_scf2_1100000004943	4.10518	1.82147
CG3709	st2	2L	FBgn0031227	18.8521	10.8886	Dsim\GD22981	Scf_2L	15.4797	3.55975	Dsec\GM16693	scaffold_14	16.6707	8.93061	CG3709-PA	2L	14.584	4.08452	Dyak\GE16383	2L	24.3963	36.8499	Dyak\GE16383	2L	21.2659	75.4879	Dere\GG24674	scaffold_4929	20.3867	19.4424	Dana\GF24546	scaffold_12943	12.413	41.9885	Dpse\GA17631	4_group3	0.217684	17.8675	Dper\GL19289	dper_scaffold_1	5.30925	12.9992	FBpp0280408-D1_1	Muller-B	1.56535e-46	8.32634	Dwil\GK23763	dwil_scf2_1100000004516	10.0779	7.76156
Reph	st2	2L	FBgn0021800	23.5621	6.1393	Dsim\GD23257	Scf_2L	17.7774	2.19938	Dsec\GM18440	scaffold_5	18.5506	1.62279	l(2)k16918-PB	2L	16.3077	1.65883	Dyak\GE18261	2L	14.6383	4.00211	Dyak\GE18261	2L	14.0788	2.1491	Dere\GG24970	scaffold_4929	7.71475	6.51352	Dana\GF15037	scaffold_12916	5.63567	0.569242	Dpse\GA17774	4_group3	0.64524	2.27543	Dper\GL18680	dper_scaffold_1	2.82749	4.53581	FBpp0279980-D1_1	Muller-B	0.91252	1.8805	Dwil\GK14652	dwil_scf2_1100000004521	16.3119	15.9179
CG13339	st2	2R	FBgn0033871	26.1719	14.5342	Dsim\GD10985	Scf_2R	26.1114	9.68776	Dsec\GM21491	scaffold_1	30.789	22.4404	CG13339-PA	2R	28.5112	12.5883	Dyak\GE12563	2R	40.0576	17.555	Dyak\GE12563	2R	47.8193	39.3328	Dere\GG20403	scaffold_4845	29.2489	12.1084	Dana\GF13712	scaffold_13266	17.1532	31.7593	Dpse\GA12218	3	0.233929	10.8845	Dper\GL17475	dper_scaffold_4	1.23115	6.39208	FBpp0276102-D1_1	Muller-C	1.05366	6.07386	Dwil\GK17858	dwil_scf2_1100000004822	24.7968	6.42691
Gr43a	st5	2R	FBgn0041243	0.132946	2.8382	Dsim\GD10264	Scf_2R	0.0270897	3.90517	Dsec\GM20802	scaffold_1	6.21211	13.2668	Gr43a-PB	2R	6.70491	12.6557	Dyak\GE24092	2L	8.34815	4.79387	Dyak\GE24092	2L	7.63673	18.6339	Dere\GG10757	scaffold_4929	2.31732	1.57237	Dana\GF12232	scaffold_13266	0	0	Dpse\Gr43a	3	0.186614	0.0675413	Dper\GL10939	dper_scaffold_2	0	0.0825598	FBpp0277103-D1_1	Muller-C	0.00932115	0.187331	Dwil\GK22017	dwil_scf2_1100000004513	6.60973	17.2779
CG14512	st5	3R	FBgn0039639	13.0816	13.4037	Dsim\GD17960	Scf_3R	14.5904	34.8636	Dsec\GM12261	scaffold_4	17.8247	66.0791	CG14512-PA	3R	29.1285	71.4458	Dyak\GE10474	3R	21.5802	38.7822	Dyak\GE10474	3R	20.6278	54.0475	Dere\GG12036	scaffold_4820	17.9611	15.2654	Dana\GF22939	scaffold_12911	23.0816	4.65523	Dpse\GA13043	2	15.2366	0.0816284	Dper\GL23604	dper_scaffold_0	14.5011	0.0536911	FBpp0282380-D1_1	Muller-E	12.312	0.0845221	Dwil\GK11188	dwil_scf2_1100000004902	15.1001	9.83944
ImpL3	st5	3L	FBgn0001258	0.0609765	11.3458	Dsim\GD13128	Scf_3L	0.0377716	0.0257707					ImpL3-PA	3L	0.0893564	2.95265	Dyak\GE20486	3L	0	6.6175	Dyak\GE20486	3L	0	3.03809	Dere\GG14061	scaffold_4784	0	2.7813	Dana\GF10902	scaffold_13337	0.740489	2.39056	Dpse\GA10121	XR_group3a	0	0.5161					FBpp0277107-D1_1	Muller-AD	0.0176548	0.0780347	Dwil\GK17340	dwil_scf2_1100000004511	0.0182717	13.3382
CG15083	st2	2R	FBgn0034399	83.9076	79.7509	Dsim\GD11415	Scf_2R	79.93	111.982	Dsec\GM21921	scaffold_1	2.45799	8.51427	CG15083-PA	2R	0.0653671	1.51575	Dyak\GE12004	2R	90.1717	15.6605	Dyak\GE12004	2R	55.0045	4.50252	Dere\GG21931	scaffold_4845	91.1531	3.07312	Dana\GF11121	scaffold_13266	13.4857	24.3516	Dpse\GA13477	3	0.0910436	0.862586	Dper\GL11234	dper_scaffold_2	0.037542	3.08922	FBpp0277417-D1_1	Muller-C	0.252629	1.25818	Dwil\GK20929	dwil_scf2_1100000004510	3.0863	5.14242
CG15083	st5	2R	FBgn0034399	83.9076	79.7509	Dsim\GD11415	Scf_2R	79.93	111.982	Dsec\GM21921	scaffold_1	2.45799	8.51427	CG15083-PA	2R	0.0653671	1.51575	Dyak\GE12004	2R	90.1717	15.6605	Dyak\GE12004	2R	55.0045	4.50252	Dere\GG21931	scaffold_4845	91.1531	3.07312	Dana\GF11121	scaffold_13266	13.4857	24.3516	Dpse\GA13477	3	0.0910436	0.862586	Dper\GL11234	dper_scaffold_2	0.037542	3.08922	FBpp0277417-D1_1	Muller-C	0.252629	1.25818	Dwil\GK20929	dwil_scf2_1100000004510	3.0863	5.14242
sprt	st2	2R	FBgn0082585	0.312198	23.5992	Dsim\GD25902	Scf_2R	0.554541	43.156	Dsec\GM20431	scaffold_1	31.3491	43.2739	sprt-PA	2R	0.385606	30.0209	Dyak\GE13523	2R	14.8413	95.1649	Dyak\GE13523	2R	22.9596	109.554	Dere\GG22649	scaffold_4845	15.9209	79.047	Dana\GF12395	scaffold_13266	61.4121	35.3569	Dpse\GA30463	3	0.0678787	7.92915	Dper\GL10396	dper_scaffold_2	3.67541	4.71913	FBpp0307276-D1_1	Muller-C	0.0565429	3.5167	Dwil\GK21885	dwil_scf2_1100000004513	3.81632	37.7532
Wsck	st2	3R	FBgn0046685	8.91269	1.54891	Dsim\GD18282	Scf_3R	3.7989	1.06159	Dsec\GM23474	scaffold_0	10.008	2.27534	Wsck-PA	3R	10.0687	2.84593	Dyak\GE10787	3R	0.748516	1.27439	Dyak\GE10787	3R	3.20753	1.12635	Dere\GG12333	scaffold_4820	3.95463	0.627831	Dana\GF17760	scaffold_13340	1.06317	0.710367	Dpse\GA16029	2	0.217032	1.43414	Dper\GL13873	dper_scaffold_7	1.19407	1.28919	FBpp0283173-D1_1	Muller-E	0.215695	0.869286	Dwil\GK12123	dwil_scf2_1100000004902	16.7367	0.627007
grsm	st5	3R	FBgn0040493	104.02	14.6647	Dsim\GD20533	Scf_3R	111.28	96.1143	Dsec\GM25972	scaffold_0	122.754	120.402	granny-smith-PB	3R	119.783	124.453	Dyak\GE24479	3R	90.7726	221.46	Dyak\GE24479	3R	107.092	270.769	Dere\GG17089	scaffold_4770	102.83	520.113	Dana\GF18094	scaffold_13340	82.0906	8.68189	Dpse\GA20276	2	8.72418	0.23344	Dper\GL23157	dper_scaffold_0	72.2055	4.19879	FBpp0283771-D1_1	Muller-E	27.0783	0.502232	Dwil\GK10859	dwil_scf2_1100000004902	83.1479	108.583
ZnT77C	st2	3L	FBgn0037000	4.57774	40.555	Dsim\GD12181	Scf_3L	22.2432	49.1598	Dsec\GM22209	scaffold_11	19.5664	77.2044	CG5130-PA	3L	10.8667	66.5399									Dere\GG13305	scaffold_4784	14.9129	127.423	Dana\GF24127	scaffold_13337	2.4161	50.5851	Dpse\GA18680	XR_group8	0.0558388	142.446	Dper\GL12772	dper_scaffold_40	0.0023348	142.992					Dwil\GK12338	dwil_scf2_1100000004830	1.69115	45.4456
Lerp	st5	3R	FBgn0051072	11.1671	9.31127	Dsim\GD18117	Scf_3R	19.91	5.97676	Dsec\GM10163	scaffold_13	12.0307	5.76163	Lerp-PD	3R	19.6372	7.63224	Dyak\GE10613	3R	8.18598	10.0486	Dyak\GE10613	3R	12.3694	6.35296	Dere\GG12170	scaffold_4820	13.1059	20.0666	Dana\GF18566	scaffold_13340	11.8187	21.0569	Dpse\GA15985	2	17.0219	2.56805	Dper\GL27266	dper_scaffold_19	28.5074	1.2131	FBpp0296996-D1_1	Muller-E	16.2953	1.07949	Dwil\GK13745	dwil_scf2_1100000004943	10.3224	8.41946
CG8312	st2	3R	FBgn0037720	15.1355	19.1419	Dsim\GD18632	Scf_3R	22.0121	8.8673	Dsec\GM23821	scaffold_0	21.8304	7.80193	CG8312-PA	3R	21.751	9.32503	Dyak\GE25968	3R	23.0428	12.3286	Dyak\GE25968	3R	25.2067	16.4413	Dere\GG16961	scaffold_4770	17.5454	9.03957	Dana\GF17154	scaffold_13340	13.4346	13.0478	Dpse\GA20977	2	0.238129	17.8604	Dper\GL21657	dper_scaffold_3	0.176434	26.1648	FBpp0281548-D1_1	Muller-E	0.426319	27.3745	Dwil\GK11221	dwil_scf2_1100000004902	20.2854	44.0097
Ubx	st5	3R	FBgn0003944	0.00681735	9.81196	Dsim\Ubx	Scf_3R	0.000350482	0.0116786	Dsec\Ubx	scaffold_12	0	0.175229	Ubx-PA	3R	0	3.77776	Dyak\Ubx	3R	0	2.46448	Dyak\Ubx	3R	0	4.05554	Dere\Ubx	scaffold_4770	0	3.20124	Dana\GF17924	scaffold_13340	0	2.87071	Dpse\Ubx	2	0.00387386	1.40226	Dper\GL23004	dper_scaffold_0	0	3.79503	FBpp0281796-D1_1	Muller-E	0.00575265	1.14325	Dwil\GK13855	dwil_scf2_1100000004943	0.0074661	3.0226
Den1	st5	2R	FBgn0033716	23.8635	27.5075	Dsim\GD10859	Scf_2R	16.3065	6.89273	Dsec\GM21362	scaffold_1	8.59777	18.4437	Den1-PC	2R	14.8997	3.49083	Dyak\GE12437	2R	12.1707	13.1521	Dyak\GE12437	2R	15.8891	11.1836	Dere\GG20277	scaffold_4845	10.9726	19.1789	Dana\GF19818	scaffold_13266	24.6345	11.3966	Dpse\GA21116	3	61.8087	0.855029	Dper\GL10824	dper_scaffold_2	49.2897	0.835869	FBpp0276993-D2_1	Muller-A	0	0.0832271	Dwil\GK22166	dwil_scf2_1100000004558	58.6131	5.73701
CG9527	st5	2L	FBgn0031813	4.95925	5.54367	Dsim\GD22578	Scf_2L	1.84667	1.89234	Dsec\GM17941	scaffold_5	6.88917	1.46778	CG9527-PB	2L	8.07873	1.97967	Dyak\GE18444	2L	20.83	2.48699	Dyak\GE18444	2L	14.8424	3.31876	Dere\GG23624	scaffold_4929	2.34876	1.17911	Dana\GF15389	scaffold_12916	5.89709	1.83362	Dpse\GA21857	4_group5	5.38031	0.859636	Dper\GL26258	dper_scaffold_5	3.9869	0.154212	FBpp0285827-D1_1	Muller-B	23.4945	0.671828	Dwil\GK15355	dwil_scf2_1100000004521	12.3777	4.07385
Gbeta5	st2	X	FBgn0030011	1.51453	0.249703	Dsim\GD16125	Scf_X	2.04516	0.368343	Dsec\GM11205	scaffold_44	4.70677	0.344051	Gbeta5-PA	X	0.586219	0.184237	Dyak\GE17476	X	1.81834	0.195568	Dyak\GE17476	X	4.91469	0.584812	Dere\GG17982	scaffold_4690	0.516265	0.11649	Dana\GF20976	scaffold_13117	37.7868	2.87237	Dpse\GA10552	XL_group1e	0.163185	0.407254	Dper\GL20190	dper_scaffold_17	0.573172	0.103746					Dwil\GK19916	dwil_scf2_1100000004515	2.18896	0.412846
ebd2	st2	3L	FBgn0037076	12.1771	22.6412	Dsim\GD12122	Scf_3L	15.2848	10.6015	Dsec\GM22144	scaffold_11	27.9139	21.9626	CG12972-PA	3L	31.545	19.889									Dere\GG13241	scaffold_4784	3.1491	7.89464	Dana\GF24198	scaffold_13337	0.16414	0	Dpse\GA11947	XR_group6	0	0.519697	Dper\GL24585	dper_scaffold_33	0.0069131	0.282654	FBpp0273998-D1_1	Muller-AD	0.0106999	0.127496	Dwil\GK20421	dwil_scf2_1100000004768	9.39821	2.24418
ebd2	st5	3L	FBgn0037076	12.1771	22.6412	Dsim\GD12122	Scf_3L	15.2848	10.6015	Dsec\GM22144	scaffold_11	27.9139	21.9626	CG12972-PA	3L	31.545	19.889									Dere\GG13241	scaffold_4784	3.1491	7.89464	Dana\GF24198	scaffold_13337	0.16414	0	Dpse\GA11947	XR_group6	0	0.519697	Dper\GL24585	dper_scaffold_33	0.0069131	0.282654	FBpp0273998-D1_1	Muller-AD	0.0106999	0.127496	Dwil\GK20421	dwil_scf2_1100000004768	9.39821	2.24418
ImpE3	st5	3R	FBgn0001255	0.711193	2.8809	Dsim\GD19436	Scf_3R	0.233721	0.610134	Dsec\GM10435	scaffold_6	1.21283	4.86192	ImpE3-PA	3R	0.874165	2.94696									Dere\GG24730	scaffold_4770	0.166853	0.258655	Dana\GF16868	scaffold_13340	0.0152485	1.2308	Dpse\GA15448	2	0.0199985	0.311793	Dper\GL22337	dper_scaffold_3	0.0475953	0.920137	FBpp0284599-D1_1	Muller-E	0.0943375	0.704286
CG7568	st5	3R	FBgn0039673	8.4788	41.0991	Dsim\GD17720	Scf_3R	17.435	51.2626	Dsec\GM12236	scaffold_4	0.0989782	0.0751237	CG7568-PC	3R	0.98804	4.55421	Dyak\GE10447	3R	0.523052	1.99289	Dyak\GE10447	3R	0.393176	2.30782	Dere\GG12011	scaffold_4820	0.373286	1.54731	Dana\GF22879	scaffold_12911	0.771831	1.67106	Dpse\GA20446	2	0.0619724	0.752738	Dper\GL13584	dper_scaffold_7	0.579156	10.689	FBpp0282838-D1_1	Muller-E	0.0114358	0.0519615	Dwil\GK11178	dwil_scf2_1100000004902	1.62425	7.26486
CG6287	st5	2L	FBgn0032350	110.206	1.39986	Dsim\GD22186	Scf_2L	82.4162	2.15234	Dsec\GM11122	scaffold_3	85.6021	3.08929	CG6287-PA	2L	92.9925	7.88157	Dyak\GE12961	2L	78.7874	0.312728	Dyak\GE12961	2L	72.0015	1.53568	Dere\GG10320	scaffold_4929	70.4651	0.819747	Dana\GF15130	scaffold_12916	89.0815	6.71227	Dpse\GA19489	4_group3	56.5003	0.558952	Dper\GL18582	dper_scaffold_1	46.2873	1.70243	FBpp0279877-D1_1	Muller-B	59.3055	0.359461	Dwil\GK15239	dwil_scf2_1100000004521	146.597	66.2638
Atox1	st2	3L	FBgn0052446	72.9724	38.5035	Dsim\GD14984	Scf_3L	72.6793	76.9412	Dsec\GM22395	scaffold_11	161.601	336.402	Atox1-PA	3L	126.825	129.633	Dyak\GE19782	3L	117.044	30.0419	Dyak\GE19782	3L	157.551	65.1607	Dere\GG16213	scaffold_4784	129.795	89.822	Dana\GF25160	scaffold_13337	120.607	71.145	Dpse\GA16911	XR_group6	0.726009	16.2919					FBpp0274471-D1_1	Muller-AD	0.257806	5.53545	Dwil\GK17053	dwil_scf2_1100000004511	80.6543	124.861
CG32052	st5	3L	FBgn0044328	0.00460015	4.1581	Dsim\GD14219	Scf_3L	0	1.19478	Dsec\GM25187	scaffold_0	0.00530613	26.1962	CG32052-PB	3L	0	3.92814	Dyak\GE21722	3L	8.6775e-09	2.5491	Dyak\GE21722	3L	0.00632967	99.1486	Dere\GG15414	scaffold_4784	0	7.24835	Dana\GF24679	scaffold_13337	2.85864e-39	3.65311	Dpse\GA16640	XR_group6	0	0.34154	Dper\GL16296	dper_scaffold_61	0	1.60176	FBpp0274200-D1_1	Muller-AD	0	0.502915	Dwil\GK11001	dwil_scf2_1100000004762	0.00674558	1.5744
CG12134	st2	2R	FBgn0033471	20.5288	28.8358	Dsim\GD10705	Scf_2R	16.8937	23.8062	Dsec\GM11121	scaffold_359	5.66872e-05	29.3178	CG12134-PA	2R	4.61592	6.42339	Dyak\GE19321	2L	14.353	37.1432	Dyak\GE19321	2L	18.0996	32.1114	Dere\GG24125	scaffold_4929	0.468902	4.19475	Dana\GF13567	scaffold_13266	11.5046	84.3518	Dpse\GA11428	3	2.9678e-11	13.2703	Dper\GL16766	dper_scaffold_4	1.24291	9.19833	FBpp0276338-D1_1	Muller-C	0.0609772	18.2636	Dwil\GK21663	dwil_scf2_1100000004513	37.1844	3.87505
CG12582	st2	3R	FBgn0037215	25.367	22.6445	Dsim\GD19705	Scf_3R	8.31578	23.7798	Dsec\GM10734	scaffold_6	15.2221	11.9329	CG12582-PA	3R	21.5549	28.7091	Dyak\GE25394	3R	35.4958	121.617	Dyak\GE25394	3R	20.3467	72.0632	Dere\GG12176	scaffold_4770	23.6656	43.8834	Dana\GF17689	scaffold_13340	15.3462	48.2637	Dpse\GA11702	2	1.29643	72.3304	Dper\GL12304	dper_scaffold_6	0.284824	2.31385					Dwil\GK12069	dwil_scf2_1100000004902	8.41403	1.70376
CG30403	st5	2R	FBgn0050403	16.1627	3.23553	Dsim\GD25170	Scf_2R	2.81485	0.764606	Dsec\GM15691	scaffold_9	4.32471	4.17649	CG30403-PB	2R	7.57618	6.02496	Dyak\GE13679	2R	1.02474	1.32465	Dyak\GE13679	2R	5.18186	2.56049	Dere\GG20747	scaffold_4845	6.29625	4.46968	Dana\GF11621	scaffold_13266	12.9334	3.01152	Dpse\GA24190	3	1.29787	0.373771	Dper\GL17522	dper_scaffold_4	0.953235	0.697315	FBpp0276054-D1_1	Muller-C	0.587328	0.704923	Dwil\GK15657	dwil_scf2_1100000004514	3.49973	9.56418
CG15772	st5	X	FBgn0029799	0.00427093	2.13409	Dsim\GD16748	Scf_X	0	1.58547	Dsec\GM12433	scaffold_4	0.0218694	3.10873	CG15772-PA	X	1.9363	4.93031	Dyak\GE16426	X	0	1.3854e-18	Dyak\GE16426	X	1.4872e-95	2.26168	Dere\GG18781	scaffold_4690	0	4.84865e-97	Dana\GF20803	scaffold_13117	0.216323	3.22598	Dpse\GA13947	XL_group3a	0.100869	0.966324	Dper\GL14465	dper_scaffold_11	0.463464	0.422711	FBpp0272130-D1_1	Muller-AD	0.114223	0.530063	Dwil\GK24924	dwil_scf2_1100000004909	0.31598	1.81828
CG14110	st5	3L	FBgn0036352	0.0162586	3.39142	Dsim\GD14447	Scf_3L	0.135545	3.3618	Dsec\GM25417	scaffold_0	0.554536	11.2923	CG14110-PA	3L	0.0348624	0.543583	Dyak\GE21967	3L	0.0168013	3.92118	Dyak\GE21967	3L	0	5.95137	Dere\GG15639	scaffold_4784	0.621292	8.78895	Dana\GF24042	scaffold_13337	5.73744e-43	4.96106	Dpse\GA12766	XR_group6	3.57347e-50	0.454803	Dper\GL15713	dper_scaffold_47	2.26889e-117	0.576499	FBpp0275160-D1_1	Muller-AD	8.05506e-33	0.446014	Dwil\GK17442	dwil_scf2_1100000004511	0	2.41346
mav	st2	4	FBgn0039914	21.0233	86.3184	Dsim\GD15474	Scf_4	43.4749	36.289	Dsec\GM26775	scaffold_30	25.0134	97.156	mav-PA	4	24.2445	68.6493	Dyak\GE14508	4	0.0339882	3.35699	Dyak\GE14508	4	0.258369	2.1548	Dere\GG16441	scaffold_4512	2.48031	6.27296	Dana\GF12294	scaffold_13499	2.08068	11.302	Dpse\GA15119	Unknown_group_497	0.150127	1.31993	Dper\GL18182	dper_scaffold_42	4.66193e-161	0.000217797	FBpp0285055-D1_1	Muller-F	0.0147813	0.753014	Dwil\GK13699	dwil_scf2_1100000004943	10.2206	21.2359
skl	st5	3L	FBgn0036786	0.00768438	9.12801					Dsec\GM14942	scaffold_19	0	4.02582	skl-PA	3L	0.0133405	9.37951	Dyak\GE22076	3L	0	8.48748	Dyak\GE22076	3L	0	6.55199	Dere\GG15744	scaffold_4784	0.0539287	4.94525	Dana\GF10820	scaffold_13337	0	11.1934	Dpse\GA12469	XR_group6	0	0.298239	Dper\GL22705	dper_scaffold_20	0	0.32839					Dwil\GK11549	dwil_scf2_1100000004762	0	2.1725
CG33260	st2	3L	FBgn0053260	3.64985	3.75248	Dsim\GD12603	Scf_3L	4.48237	3.11472	Dsec\GM24532	scaffold_0	1.94316	6.86723	CG33260-PC	3L	9.41008	5.08108	Dyak\GE20005	3L	3.19114	4.64118	Dyak\GE20005	3L	4.71242	9.77244	Dere\GG13711	scaffold_4784	2.58799e-57	3.25078	Dana\GF25183	scaffold_13337	3.32115	1.32718	Dpse\GA23655	XR_group6	0.202742	1.73873	Dper\GL26106	dper_scaffold_12	43.0492	178.811	FBpp0274857-D1_1	Muller-AD	0.365112	2.09805	Dwil\GK10584	dwil_scf2_1100000004949	13.7972	33.3338
RhoU	st2	X	FBgn0083940	3.35696	68.7363	Dsim\GD24695	Scf_X	4.80706	120.464	Dsec\GM11409	scaffold_15	1.40104	12.4707	CG34104-PB	X	7.33346	141.636	Dyak\GE17831	X	5.10133	208.08	Dyak\GE17831	X	16.6409	245.391	Dere\GG18344	scaffold_4690	3.9181	203.685	Dana\GF19197	scaffold_13047	9.70173	81.9028	Dpse\GA22295	XL_group3a	0.868092	127.715	Dper\GL18063	dper_scaffold_62	0.474041	5.44807					Dwil\GK19827	dwil_scf2_1100000004515	13.5572	144.068
Cyp4ae1	st5	X	FBgn0015036	1.65843	9.52347	Dsim\GD16594	Scf_X	3.04745	5.45792	Dsec\GM19205	scaffold_10	0.920729	12.516	Cyp4ae1-PA	X	0.0736228	7.26137	Dyak\GE16243	X	0.0694338	0.000306234	Dyak\GE16243	X	0.931691	1.69326	Dere\GG12915	scaffold_4644	0.369774	2.6011	Dana\GF22197	scaffold_12929	0.40638	1.35756	Dpse\GA22860	XL_group1a	7.62663e-10	0.00458586	Dper\GL13323	dper_scaffold_26	2.52766e-10	0.890755	FBpp0273166-D1_1	Muller-A	2.73429e-15	0.0456139	Dwil\GK16044	dwil_scf2_1100000004963	2.64614e-05	1.29656
phol	st5	3L	FBgn0035997	55.8072	13.5385	Dsim\GD12921	Scf_3L	36.4889	2.81664	Dsec\GM24870	scaffold_0	28.8911	2.60082	phol-PA	3L	32.4383	2.22884	Dyak\GE21239	3L	47.1083	14.8688	Dyak\GE21239	3L	43.1153	12.8485	Dere\GG14036	scaffold_4784	37.8709	21.3217	Dana\GF24664	scaffold_13337	51.2123	11.1027	Dpse\GA17456	XR_group8	18.3844	0.854882	Dper\GL17968	dper_scaffold_24	22.018	4.04226e-99					Dwil\GK20506	dwil_scf2_1100000004768	26.4624	6.14872
AnxB11	st5	X	FBgn0030749	26.1093	55.9361	Dsim\GD15750	Scf_X	16.3132	33.5187	Dsec\GM13401	scaffold_17	21.9301	55.2277	Anxb11-PB	X	11.6221	27.6259	Dyak\GE15970	X	6.17868	18.0171	Dyak\GE15970	X	3.69195	30.2493	Dere\GG19323	scaffold_4690	5.49069	84.0417	Dana\GF19282	scaffold_13137	0.704417	18.74	Dpse\GA22156	XL_group1e	0.065766	1.17625	Dper\GL15887	dper_scaffold_22	0.0125471	0.178348	FBpp0276885-D1_1	Muller-A	0.0212869	0.593711	Dwil\GK25708	dwil_scf2_1100000004909	18.8633	12.0445
CG15629	st2	2L	FBgn0031630	0.100178	18.4081	Dsim\GD23300	Scf_2L	4.26962	14.0916	Dsec\GM18492	scaffold_5	3.59471	10.9303	CG15629-PA	2L	2.68532	16.1142	Dyak\GE18307	2L	0.288204	24.3473	Dyak\GE18307	2L	0.304212	29.4301	Dere\GG25019	scaffold_4929	1.85277	26.0192	Dana\GF15490	scaffold_12916	2.97316	9.07142	Dpse\GA13859	4_group3	0.839587	4.80341	Dper\GL19368	dper_scaffold_1	2.08896	4.38842	FBpp0280491-D1_1	Muller-B	1.22814	3.48623	Dwil\GK24179	dwil_scf2_1100000004585	2.14508	6.81162
CG34293	st5	3R	FBgn0085322	11.556	6.6433	Dsim\GD18090	Scf_3R	21.5938	6.33974	Dsec\GM10128	scaffold_13	27.4323	4.84084	CG34293-PA	3R	85.1895	5.06242	Dyak\GE10582	3R	28.0795	5.30081	Dyak\GE10582	3R	18.0748	7.77278	Dere\GG12135	scaffold_4820	13.093	1.81458					Dpse\GA26657	2	27.2717	0.778529	Dper\GL23609	dper_scaffold_0	17.3163	1.54386	FBpp0282390-D1_1	Muller-E	19.1567	0.202143	Dwil\GK11193	dwil_scf2_1100000004902	22.0162	23.3888
CG4061	st5	X	FBgn0025630	4.72872	2.95003	Dsim\GD16584	Scf_X	6.67158	5.73059	Dsec\GM19193	scaffold_10	11.2027	8.73064	CG4061-PA	X	34.9773	6.16431	Dyak\GE16231	X	5.13387	0.515025	Dyak\GE16231	X	3.44153	0.120694	Dere\GG12902	scaffold_4644	11.7679	3.96946	Dana\GF22226	scaffold_12929	11.3268	8.21894	Dpse\GA17926	XL_group1e	12.4639	0.141428	Dper\GL18225	dper_scaffold_30	21.8189	0.655261	FBpp0285355-D1_1	Muller-A	13.7004	0.474293	Dwil\GK16447	dwil_scf2_1100000004590	10.7572	3.61542
CG6574	st2	3R	FBgn0037846	4.48982	5.94088	Dsim\GD20696	Scf_3R	2.61537	7.06574	Dsec\GM26143	scaffold_0	5.992	5.60267e-98	CG6574-PA	3R	5.28874	15.8894	Dyak\GE24660	3R	2.63483	7.64989	Dyak\GE24660	3R	12.0579	17.2077	Dere\GG17259	scaffold_4770	10.4484	0.846941	Dana\GF16177	scaffold_13340	37.0103	17.8865	Dpse\GA19694	2	1.53408e-31	1.17271	Dper\GL12063	dper_scaffold_6	1.09691e-261	0.448824					Dwil\GK13288	dwil_scf2_1100000004943	1.21332	2.00917
CG6574	st5	3R	FBgn0037846	4.48982	5.94088	Dsim\GD20696	Scf_3R	2.61537	7.06574	Dsec\GM26143	scaffold_0	5.992	5.60267e-98	CG6574-PA	3R	5.28874	15.8894	Dyak\GE24660	3R	2.63483	7.64989	Dyak\GE24660	3R	12.0579	17.2077	Dere\GG17259	scaffold_4770	10.4484	0.846941	Dana\GF16177	scaffold_13340	37.0103	17.8865	Dpse\GA19694	2	1.53408e-31	1.17271	Dper\GL12063	dper_scaffold_6	1.09691e-261	0.448824					Dwil\GK13288	dwil_scf2_1100000004943	1.21332	2.00917
Sulf1	st2	3R	FBgn0040271	14.0622	24.6735	Dsim\GD20299	Scf_3R	10.5169	28.6873	Dsec\GM15446	scaffold_12	9.12373	18.8001	Sulf1-PA	3R	12.3436	24.8707	Dyak\GE26324	3R	22.8336	38.0625	Dyak\GE26324	3R	22.0042	39.0746	Dere\GG20070	scaffold_4770	15.9182	19.8724	Dana\GF16526	scaffold_13340	10.3793	31.8389	Dpse\GA19814	2	0.145432	23.5283	Dper\GL22250	dper_scaffold_3	0.10793	70.742	FBpp0284513-D1_1	Muller-E	0.0425347	17.68	Dwil\GK13512	dwil_scf2_1100000004943	3.44508	29.6338
Fbw5	st5	2L	FBgn0031773	13.2617	10.7696	Dsim\GD22601	Scf_2L	15.915	19.0774	Dsec\GM17963	scaffold_5	38.5571	46.8241	Fbw5-PA	2L	15.6039	16.0243	Dyak\GE18949	2L	0.624009	5.73975	Dyak\GE18949	2L	11.5242	17.9798	Dere\GG10138	scaffold_4929	13.8637	24.0173	Dana\GF15406	scaffold_12916	2.87086	1.45286	Dpse\GA21573	4_group1	16.1685	0.239548	Dper\GL19079	dper_scaffold_1	18.4855	0.317531					Dwil\GK15391	dwil_scf2_1100000004521	28.5755	27.3505
Acyp2	st2	3R	FBgn0038363	17.1069	29.7428					Dsec\GM24259	scaffold_0	29.3388	91.8355	Acyp2-PA	3R	47.6797	155.58	Dyak\GE24338	3R	37.4159	23.3408	Dyak\GE24338	3R	65.9376	104.5	Dere\GG16952	scaffold_4770	33.0318	27.6994	Dana\GF18541	scaffold_13340	16.7445	59.1462	Dpse\GA27428	2	0.0697815	1.09179	Dper\GL22235	dper_scaffold_3	0.0806991	0.914676	FBpp0284497-D1_1	Muller-E	0.666601	1.12608	Dwil\GK12388	dwil_scf2_1100000004762	0	0
CG13204	st2	2R	FBgn0033627	2.3637	0.774328	Dsim\GD10794	Scf_2R	2.17033	0.810054	Dsec\GM21286	scaffold_1	1.57097	5.77064					Dyak\GE12359	2R	0.450413	1.34765	Dyak\GE12359	2R	3.34058	1.19669	Dere\GG20199	scaffold_4845	0.788487	3.7769	Dana\GF12551	scaffold_13266	4.6222	2.75311	Dpse\GA24236	3	0.255945	0.108843	Dper\GL11688	dper_scaffold_2	1.60261	0.879961	FBpp0276178-D1_1	Muller-C	0.997934	1.71402	Dwil\GK23098	dwil_scf2_1100000004954	5.22645	8.89526
Gr47b	st2	2R	FBgn0041241	0.352305	3.87262	Dsim\GD15394	Scf_2R	0.167063	1.04917	Dsec\GM21285	scaffold_1	22.3769	86.2158	Gr47b-PA	2R	18.4133	62.3008	Dyak\GE12357	2R	15.5532	28.3923	Dyak\GE12357	2R	17.2643	57.2616	Dere\GG20198	scaffold_4845	16.3655	45.8353	Dana\GF12550	scaffold_13266	11.8097	13.941	Dpse\Gr47b	3	0	0.409143									Dwil\GK19220	dwil_scf2_1100000004954	41.4523	72.1729
Gr47b	st5	2R	FBgn0041241	0.352305	3.87262	Dsim\GD15394	Scf_2R	0.167063	1.04917	Dsec\GM21285	scaffold_1	22.3769	86.2158	Gr47b-PA	2R	18.4133	62.3008	Dyak\GE12357	2R	15.5532	28.3923	Dyak\GE12357	2R	17.2643	57.2616	Dere\GG20198	scaffold_4845	16.3655	45.8353	Dana\GF12550	scaffold_13266	11.8097	13.941	Dpse\Gr47b	3	0	0.409143									Dwil\GK19220	dwil_scf2_1100000004954	41.4523	72.1729
Hmgs	st5	2R	FBgn0010611	39.8195	4.76222	Dsim\Hmgs	Scf_2R	35.5939	15.6702	Dsec\GM21690	scaffold_1	41.0021	13.4748	Hmgs-PA	2R	46.5682	22.8707	Dyak\GE11785	2R	35.3135	6.9224	Dyak\GE11785	2R	18.3772	14.5362	Dere\GG20599	scaffold_4845	27.0177	2.33189	Dana\GF13593	scaffold_13266	25.6623	4.69473	Dpse\GA18098	3	18.0348	0.7021	Dper\GL10732	dper_scaffold_2	29.1599	9.75632	FBpp0276898-D1_1	Muller-C	25.0865	0.47255	Dwil\GK21611	dwil_scf2_1100000004513	49.1116	9.44506
Alk	st5	2R	FBgn0040505	0.00141672	1.60889	Dsim\GD25528	Scf_2R	0	3.18451	Dsec\GM20045	scaffold_1	8.2068e-09	2.89086	Alk-PA	2R	0	1.22857	Dyak\GE14049	2R	0	4.53881	Dyak\GE14049	2R	0	2.67063	Dere\GG22256	scaffold_4845	0	1.73907	Dana\GF13459	scaffold_13266	0.0043374	5.70454	Dpse\GA20930	3	0.00117327	1.06117	Dper\GL11825	dper_scaffold_37	5.97821e-169	6.83366	FBpp0278795-D1_1	Muller-C	0.00283104	0.057016	Dwil\GK10731	dwil_scf2_1100000004382	0.00606171	3.45714
DnaJ-H	st2	2L	FBgn0032474	58.5984	1.20809	Dsim\GD22085	Scf_2L	8.50245	0.722233	Dsec\GM25845	scaffold_16	1.32497	3.40984	DnaJ-H-PB	2L	6.67809	0.717346	Dyak\GE11908	2L	8.3523	0.372349	Dyak\GE11908	2L	5.21798	0.201914	Dere\GG10228	scaffold_4929	4.57763	0.483474	Dana\GF15647	scaffold_12916	1.08015	8.71215	Dpse\GA22062	4_group4	0.359371	15.0807	Dper\GL24772	dper_scaffold_46	0.0364463	21.3771	FBpp0287618-D1_1	Muller-B	0.00566313	26.177	Dwil\GK14806	dwil_scf2_1100000004521	40.9005	8.21871
CG11739	st5	3R	FBgn0037239	33.2376	2.25519	Dsim\GD19721	Scf_3R	29.4317	1.01833	Dsec\GM10749	scaffold_6	41.4733	29.6438	CG11739-PC	3R	13.929	0.554081	Dyak\GE25411	3R	58.9129	2.39935	Dyak\GE25411	3R	99.205	12.3372	Dere\GG12340	scaffold_4770	14.4692	2.55254	Dana\GF18208	scaffold_13340	22.8865	11.2383	Dpse\GA26276	2	25.9487	0.419493									Dwil\GK13527	dwil_scf2_1100000004943	14.898	3.79455
CG8596	st5	3L	FBgn0035767	0.0105271	1.931	Dsim\GD13069	Scf_3L	0.0136835	0.315447	Dsec\GM13772	scaffold_2	0.140728	48.9767	CG8596-PA	3L	2.04328e-109	1.74527	Dyak\GE20423	3L	0.102757	2.00475	Dyak\GE20423	3L	0.0178222	0.966968	Dere\GG14976	scaffold_4784	0.02735	7.77517	Dana\GF25123	scaffold_13337	0.0200885	2.39678	Dpse\GA28324	XR_group8	2.44694	0.53235	Dper\GL21121	dper_scaffold_65	13.4036	20.6453	FBpp0286309-D1_1	Muller-AD	9.93851	0.877186	Dwil\GK16668	dwil_scf2_1100000004511	2.73912	8.83312
CG11334	st5	3R	FBgn0039849	51.6003	20.7566	Dsim\GD16414	Scf_3R	49.6743	21.4325	Dsec\GM12085	scaffold_4	38.4871	26.869	CG11334-PA	3R	41.043	20.6245	Dyak\GE23315	3R	45.034	32.3177	Dyak\GE23315	3R	39.2947	22.9107	Dere\GG11866	scaffold_4820	44.3896	16.1927	Dana\GF17194	scaffold_13340	33.6202	25.6496	Dpse\GA10928	2	16.7514	0.350134	Dper\GL27236	dper_scaffold_19	28.407	0.5093	FBpp0282685-D1_1	Muller-E	14.2344	0.119086	Dwil\GK22419	dwil_scf2_1100000004921	22.6746	58.522
CG3835	st2	X	FBgn0023507	6.38421	13.6559	Dsim\GD16587	Scf_X	5.76568	3.93168	Dsec\GM19199	scaffold_10	11.0535	18.9604	CG3835-PB	X	2.68851	12.8247	Dyak\GE16237	X	6.42783	15.2012	Dyak\GE16237	X	2.9579	6.5921	Dere\GG12909	scaffold_4644	1.82143	2.35125	Dana\GF21462	scaffold_13117	3.20629	63.9195	Dpse\GA17719	XL_group3a	0.810591	1.13931	Dper\GL14161	dper_scaffold_11	7.60731	4.83051	FBpp0272332-D1_1	Muller-AD	1.39011	9.70949	Dwil\GK10230	dwil_scf2_1100000004909	6.96158	24.0695
CG9410	st5	2R	FBgn0033086	15.0468	6.90132	Dsim\GD10417	Scf_2R	14.3282	26.5965	Dsec\GM20887	scaffold_1	1.32313e-08	2.74893e-91					Dyak\GE19067	2L	21.914	26.7848	Dyak\GE19067	2L	32.3891	19.8774	Dere\GG23213	scaffold_4929	28.0566	18.1893	Dana\GF11062	scaffold_13266	41.1373	88.2686	Dpse\GA21766	3	13.4939	0.0120385	Dper\GL11110	dper_scaffold_2	1.82132	0					Dwil\GK23085	dwil_scf2_1100000004954	8.2855	15.504
Fas1	st2	3R	FBgn0262742	52.9575	153.855	Dsim\GD19117	Scf_3R	40.997	130.166					Fas1-PD	3R	78.2245	200.562	Dyak\GE24584	3R	71.0123	156.476	Dyak\GE24584	3R	70.358	124.518	Dere\GG21753	scaffold_4770	52.3987	80.6286	Dana\GF17065	scaffold_13340	56.4878	240.96	Dpse\GA19705	2	0.139369	32.2635	Dper\GL24322	dper_scaffold_0	7.71573	56.7579	FBpp0297451-D1_1	Muller-E	1.07689	15.2284	Dwil\GK22538	dwil_scf2_1100000004921	70.938	245.852
CG6420	st5	3R	FBgn0039451	14.8608	0.879976	Dsim\GD18121	Scf_3R	22.0311	1.95116	Dsec\GM10167	scaffold_13	19.8409	1.59953	CG6420-PA	3R	15.097	1.66558	Dyak\GE10616	3R	19.0922	1.82317	Dyak\GE10616	3R	21.1367	1.23513	Dere\GG12172	scaffold_4820	16.6537	0.859839	Dana\GF18568	scaffold_13340	20.1103	6.32703	Dpse\GA26608	2	8.68161	0.191299	Dper\GL24432	dper_scaffold_0	30.7431	2.55997	FBpp0282269-D1_1	Muller-E	23.712	0.750284	Dwil\GK13952	dwil_scf2_1100000004943	27.5792	11.3079
sano	st5	2R	FBgn0034408	0.277397	1.69453	Dsim\GD11421	Scf_2R	0	3.56819	Dsec\GM21926	scaffold_1	0	15.6209	sano-PB	2R	0	0.292862	Dyak\GE12013	2R	0.00245455	9.63936	Dyak\GE12013	2R	0	2.41235	Dere\GG21937	scaffold_4845	0.00497183	0.881754	Dana\GF11127	scaffold_13266	0.0905872	1.03697	Dpse\GA11794	3	1.58564	0.415379	Dper\GL11498	dper_scaffold_2	0.2895	0.562537	FBpp0277701-D1_1	Muller-C	0.200313	0.315966	Dwil\GK20934	dwil_scf2_1100000004510	0.000633931	6.52425
CG8915	st5	X	FBgn0030833	27.784	8.35201	Dsim\GD15688	Scf_X	54.2803	11.1504	Dsec\GM13326	scaffold_17	27.2122	13.1069	CG8915-PA	X	34.4823	15.6743	Dyak\GE15607	X	27.3541	19.3975	Dyak\GE15607	X	28.7578	5.34333	Dere\GG18192	scaffold_4690	20.7497	5.49468	Dana\GF22621	scaffold_13248	15.6526	1.99297	Dpse\GA21407	XL_group1e	21.8001	1.66398	Dper\GL19838	dper_scaffold_18	24.4078	3.13866	FBpp0284193-D1_1	Muller-A	33.0924	0.554113	Dwil\GK25129	dwil_scf2_1100000004909	23.5968	14.0837
btn	st5	3R	FBgn0014949	0.235826	3.24009	Dsim\GD18444	Scf_3R	0.409058	1.59779	Dsec\GM23634	scaffold_0	0.470266	4.39934	btn-PA	3R	0.95972	1.51391	Dyak\GE24022	3R	0.028406	0.238709	Dyak\GE24022	3R	1.01914	1.16093	Dere\GG12502	scaffold_4820	0.230932	3.16444	Dana\GF16143	scaffold_13340	0	0	Dpse\GA18771	2	0.022245	0.632741	Dper\GL13677	dper_scaffold_7	0.0276514	0.171045	FBpp0283269-D1_1	Muller-E	0	0.760631	Dwil\GK11783	dwil_scf2_1100000004902	1.04696	2.47061
GstZ1	st5	3R	FBgn0037696	10.2975	54.59	Dsim\GD20796	Scf_3R	12.4569	31.914	Dsec\GM26257	scaffold_0	12.1293	55.3644	CG9362-PA	3R	17.4652	61.2796	Dyak\GE24777	3R	6.5722	8.67589	Dyak\GE24777	3R	1.35026	0.58338	Dere\GG17372	scaffold_4770	13.7578	8.35278	Dana\GF17763	scaffold_13340	26.2467	159.816	Dpse\GA21731	2	10.4806	0.858079	Dper\GL13669	dper_scaffold_7	3.25567	0.200791					Dwil\GK12127	dwil_scf2_1100000004902	21.8833	59.5701
CG6683	st2	3L	FBgn0035902	20.6013	15.0883	Dsim\GD12981	Scf_3L	24.6223	11.8415	Dsec\GM24933	scaffold_0	22.5405	64.9392	CG6683-PA	3L	37.0133	30.6035	Dyak\GE21300	3L	20.0258	15.0166	Dyak\GE21300	3L	29.1258	14.6456	Dere\GG15076	scaffold_4784	17.3618	34.214	Dana\GF10162	scaffold_13337	32.9696	5.6919	Dpse\Ovd	XR_group6	0	0.418716	Dper\GL15568	dper_scaffold_35	0.186806	0.0484825	FBpp0274248-D1_1	Muller-AD	0.16858	0.565681	Dwil\GK20541	dwil_scf2_1100000004768	24.194	52.4525
CG6683	st5	3L	FBgn0035902	20.6013	15.0883	Dsim\GD12981	Scf_3L	24.6223	11.8415	Dsec\GM24933	scaffold_0	22.5405	64.9392	CG6683-PA	3L	37.0133	30.6035	Dyak\GE21300	3L	20.0258	15.0166	Dyak\GE21300	3L	29.1258	14.6456	Dere\GG15076	scaffold_4784	17.3618	34.214	Dana\GF10162	scaffold_13337	32.9696	5.6919	Dpse\Ovd	XR_group6	0	0.418716	Dper\GL15568	dper_scaffold_35	0.186806	0.0484825	FBpp0274248-D1_1	Muller-AD	0.16858	0.565681	Dwil\GK20541	dwil_scf2_1100000004768	24.194	52.4525
Pka-R2	st5	2R	FBgn0022382	23.6496	5.38525	Dsim\GD10033	Scf_2R	24.6691	1.11253	Dsec\GM20562	scaffold_1	34.2688	1.71056	Pka-R2-PA	2R	28.8672	1.91653	Dyak\GE21875	2L	28.4552	2.14685	Dyak\GE21875	2L	30.2997	3.62237	Dere\GG25241	scaffold_4929	21.5768	0.761796	Dana\GF13729	scaffold_13266	63.7078	39.8732	Dpse\GA13988	3	30.9167	1.11198	Dper\GL10567	dper_scaffold_2	38.0301	0.894023	FBpp0276721-D1_1	Muller-C	29.1434	0.51489	Dwil\GK21366	dwil_scf2_1100000004513	23.9107	18.0149
CG10864	st5	3R	FBgn0038621	0.0124564	1.36196	Dsim\GD17956	Scf_3R	0	0.378041	Dsec\GM18700	scaffold_5	0	5.59667	CG10864-PA	3R	0	0.918454									Dere\GG16444	scaffold_4770	0	3.47745	Dana\GF18109	scaffold_13340	0	3.98029	Dpse\GA10607	2	0.00830562	0.614406	Dper\GL23185	dper_scaffold_0	0.0136904	0.318746					Dwil\GK18976	dwil_scf2_1100000004943	0.0424594	2.01631
tweek	st2	2L	FBgn0261671	7.21388	16.0305					Dsec\GM17221	scaffold_7	5.20869	7.79651	tweek-PH	2L	10.6086	12.6342	Dyak\GE12780	2R	5.3429	11.3325	Dyak\GE12780	2R	4.22514	9.68753	Dere\GG21071	scaffold_4845	6.08193	11.3326	Dana\GF14780	scaffold_12916	2.96792	3.03965	Dpse\GA18470	4_group3	0.105544	1.19231	Dper\GL14232	dper_scaffold_8	2.61631	4.02519	FBpp0278500-D1_1	Muller-B	0.376001	0.662263	Dwil\GK23792	dwil_scf2_1100000004516	14.9518	40.8468
CG2915	st2	2R	FBgn0033241	51.2161	536.434					Dsec\GM20741	scaffold_1	65.3694	614.889					Dyak\GE23465	2L	154.918	1171.19	Dyak\GE23465	2L	81.7476	1488.24	Dere\GG10693	scaffold_4929	76.9044	2416.64	Dana\GF11227	scaffold_13266	2.15858	2205.92	Dpse\GA15515	3	1.05333	844.334	Dper\GL10609	dper_scaffold_2	3.18277	906.285	FBpp0276762-D1_1	Muller-C	0.9809	1008.25	Dwil\GK15729	dwil_scf2_1100000004514	5.87373	966.063
Bx	st2	X	FBgn0265598	16.6841	0.457971	Dsim\GD17400	Scf_X	10.7449	0.351722	Dsec\GM22905	scaffold_8	17.5318	0.629538	CG15048-PB	X	0	0.501603	Dyak\GE17735	X	17.6768	0.780151	Dyak\GE17735	X	36.6455	1.90469	Dere\GG19173	scaffold_4690	14.8043	0.707602	Dana\GF22537	scaffold_13248	24.2494	8.43486	Dpse\GA22333	XL_group3a	0.043924	0.062098	Dper\GL18822	dper_scaffold_1	9.4933	1.19186	FBpp0272248-D1_1	Muller-A	0.0173014	0.158325	Dwil\GK17103	dwil_scf2_1100000004963	28.9042	0.280827
Vps20	st5	2R	FBgn0034744	49.7992	21.6139	Dsim\GD11680	Scf_2R	64.3915	29.5001	Dsec\GM15925	scaffold_9	72.107	32.1682	Vps20-PA	2R	52.8793	27.1688	Dyak\GE14000	2R	2.80405e-29	2.33424e-111	Dyak\GE14000	2R	64.3601	18.9999	Dere\GG21058	scaffold_4845	39.8377	24.5781	Dana\GF11904	scaffold_13266	60.5732	87.4674	Dpse\GA17936	3	0.0546292	0.0732991	Dper\GL11590	dper_scaffold_2	2.63304	8.01835e-202	FBpp0277798-D1_1	Muller-C	20.1036	1.40863e-06	Dwil\GK17897	dwil_scf2_1100000004822	44.7533	22.53
CG5355	st2	2L	FBgn0032242	99.2732	372.981	Dsim\GD22260	Scf_2L	103.002	495.096	Dsec\GM11679	scaffold_3	137.76	595.224	CG5355-PA	2L	151.221	670.713									Dere\GG23933	scaffold_4929	102.402	629.626	Dana\GF14099	scaffold_12916	94.6996	518.676	Dpse\GA25293	4_group1	0.00323992	0.0473415	Dper\GL26118	dper_scaffold_5	0	0.0435791					Dwil\GK23547	dwil_scf2_1100000004968	39.7758	154.47
CG5355	st5	2L	FBgn0032242	99.2732	372.981	Dsim\GD22260	Scf_2L	103.002	495.096	Dsec\GM11679	scaffold_3	137.76	595.224	CG5355-PA	2L	151.221	670.713									Dere\GG23933	scaffold_4929	102.402	629.626	Dana\GF14099	scaffold_12916	94.6996	518.676	Dpse\GA25293	4_group1	0.00323992	0.0473415	Dper\GL26118	dper_scaffold_5	0	0.0435791					Dwil\GK23547	dwil_scf2_1100000004968	39.7758	154.47
CG18769	st5	3L	FBgn0042185	39.2781	1.96393	Dsim\GD13962	Scf_3L	78.1964	5.88774	Dsec\GM14790	scaffold_2	85.5364	6.58058					Dyak\GE21569	3L	58.5817	2.23637	Dyak\GE21569	3L	104.22	4.26714	Dere\GG15350	scaffold_4784	78.9819	10.3865	Dana\GF23542	scaffold_13337	60.2317	5.0091	Dpse\GA28279	XR_group8	45.8414	0.766031	Dper\GL13268	dper_scaffold_38	84.3504	1.19236	FBpp0286191-D1_1	Muller-AD	42.0845	1.18032	Dwil\GK12545	dwil_scf2_1100000004729	37.433	2.42799
CG7860	st2	X	FBgn0030653	1.06484	1.71911	Dsim\GD24689	Scf_X	2.79797	11.0653					CG7860-PA	X	0.901227	2.98703	Dyak\GE17195	X	5.35348	12.6786	Dyak\GE17195	X	3.90264	0.57888	Dere\GG17888	scaffold_4690	3.81897	5.24707	Dana\GF21911	scaffold_12929	3.16676	2.41883	Dpse\GA20639	XL_group1a	0	1.14427	Dper\GL16551	dper_scaffold_15	1.45194e-284	7.53468	FBpp0273649-D1_1	Muller-A	0.0528125	0.171523	Dwil\GK20035	dwil_scf2_1100000004515	1.4311	0.792527
Idgf2	st5	2L	FBgn0020415	7.00279	61.9595	Dsim\GD24057	Scf_2L	47.8637	194.989	Dsec\GM17178	scaffold_7	51.6584	199.953	Idgf2-PA	2L	23.8342	59.6798	Dyak\GE13108	2R	30.3272	93.7864	Dyak\GE13108	2R	6.59511	36.0083	Dere\GG22749	scaffold_4845	48.9187	277.583	Dana\GF13994	scaffold_12916	14.8722	91.8392	Dpse\GA18210	4_group3	0	0.00676811	Dper\GL19638	dper_scaffold_1	0.0484414	0.143271					Dwil\GK24710	dwil_scf2_1100000004585	16.8147	5.31962
CG15111	st5	2R	FBgn0034419	23.2189	42.2913	Dsim\GD11430	Scf_2R	23.0604	36.7784	Dsec\GM21934	scaffold_1	41.4905	52.3374	CG15111-PB	2R	24.6165	63.0053	Dyak\GE12020	2R	27.8384	81.0773	Dyak\GE12020	2R	25.5086	40.2658	Dere\GG21946	scaffold_4845	29.292	79.6446	Dana\GF11491	scaffold_13266	28.1828	95.3584	Dpse\GA13500	3	0.290003	4.16538	Dper\GL11873	dper_scaffold_37	9.0174	0.123866	FBpp0278834-D1_1	Muller-C	8.2455	1.23597	Dwil\GK17965	dwil_scf2_1100000004822	22.4397	112.261
CG6891	st2	X	FBgn0030955	0.0387583	2.64077	Dsim\GD17404	Scf_NODE_39788	1.41096	8.72533	Dsec\GM22913	scaffold_8	0.60519	14.1159	CG6891-PA	X	32.2336	122.02	Dyak\GE17746	X	4.67353	36.082	Dyak\GE17746	X	1.02149	27.8049	Dere\GG19183	scaffold_4690	5.14049	7.54171	Dana\GF19083	scaffold_13047	8.23546	8.73438	Dpse\GA19933	XL_group3a	0.0490192	1.23331	Dper\GL26993	dper_scaffold_39	0.00918122	0.748702					Dwil\GK10196	dwil_scf2_1100000004909	13.7473	4.19007
zfh1	st5	3R	FBgn0004606	9.66424	8.85663	Dsim\GD21545	Scf_3R	10.7894	8.85912					zfh1-PB	3R	9.3675	2.48947	Dyak\GE10901	3R	21.8323	18.0171	Dyak\GE10901	3R	35.078	42.3325	Dere\GG11775	scaffold_4820	10.7641	3.67009	Dana\GF22922	scaffold_12911	9.07785	2.65046	Dpse\GA12131	2	6.82986	2.61191	Dper\GL13515	dper_scaffold_7	18.8873	4.16462	FBpp0293306-D1_1	Muller-E	10.0721	2.32738	Dwil\GK14154	dwil_scf2_1100000004943	34.5143	5.9838
CG11388	st5	2R	FBgn0034959	1.56345	12.7605					Dsec\GM16083	scaffold_9	2.41356	17.1067	CG11388-PA	2R	1.75402	12.1597	Dyak\GE14358	2R	0.396536	18.1015	Dyak\GE14358	2R	0.514602	19.531	Dere\GG22921	scaffold_4845	0.14235	7.61811	Dana\GF12890	scaffold_13266	1.82715	1.56886	Dpse\GA10968	3	0	0.383935	Dper\GL11650	dper_scaffold_2	0	0.105193	FBpp0277862-D1_1	Muller-C	0	0.642239	Dwil\GK21934	dwil_scf2_1100000004513	6.26495	2.02991
danr	st5	3R	FBgn0039283	0.0222957	135.124	Dsim\GD21179	Scf_3R	0.0284568	151.376	Dsec\GM17808	scaffold_33	0.0796912	127.971	danr-PA	3R	0.066923	157.442	Dyak\GE23564	3R	0.0528341	203.92	Dyak\GE23564	3R	0	262.133	Dere\GG11367	scaffold_4820	0.0430608	282.675	Dana\GF17893	scaffold_13340	0.0526824	194.16	Dpse\GA12437	Unknown_group_4	0	0.00607642	Dper\GL21906	dper_scaffold_3	0	0.0298229	FBpp0285372-D1_1	Muller-E	0	0.0113119	Dwil\GK13890	dwil_scf2_1100000004943	0	180.385
CG7341	st2	3L	FBgn0036777	10.2545	5.30012	Dsim\GD14746	Scf_3L	22.1124	3.81172	Dsec\GM14966	scaffold_19	13.9395	11.3469	CG7341-PA	3L	16.5604	8.98416	Dyak\GE19948	3L	21.5462	3.8429	Dyak\GE19948	3L	31.4498	7.72188	Dere\GG13651	scaffold_4784	10.385	21.1052	Dana\GF23618	scaffold_13337	2.02385	2.17572	Dpse\GA20277	XR_group6	0.282567	1.86291	Dper\GL22866	dper_scaffold_20	31.8652	62.7826	FBpp0275463-D1_1	Muller-AD	0.166882	3.59968e-06	Dwil\GK24761	dwil_scf2_1100000004585	12.0623	12.7868
mub	st5	3L	FBgn0262737	82.9187	20.4291					Dsec\GM22416	scaffold_11	89.0298	8.16589	mub-PK	3L	101.57	4.17088	Dyak\GE22592	3L	96.5665	8.95095	Dyak\GE22592	3L	97.0283	6.6955	Dere\GG16232	scaffold_4784	88.9749	7.13362	Dana\GF10933	scaffold_13337	27.6689	8.79055	Dpse\GA20351	XR_group6	77.3062	1.17509					FBpp0274429-D1_1	Muller-AD	78.1494	1.34775	Dwil\GK10610	dwil_scf2_1100000004762	90.0696	161.259
Usp2	st2		FBgn0031187			Dsim\GD17542	Scf_X	22.2778	20.9947	Dsec\GM11729	scaffold_55	24.2317	22.7488					Dyak\GE17938	X	9.3224	6.23967	Dyak\GE17938	X	10.6411	10.9064	Dere\GG19743	scaffold_4690	6.5223	16.1756	Dana\GF21001	scaffold_13117	24.84	8.88693	Dpse\GA13118	XL_group1a	0.712899	7.35903	Dper\GL13296	dper_scaffold_26	0.829093	6.00727	FBpp0273093-D1_1	Muller-A	1.92011	5.68685	Dwil\GK16418	dwil_scf2_1100000004590	9.22972	22.9944
vnc	st2		FBgn0263251			Dsim\GD14230	Scf_3L	90.7108	40.426	Dsec\GM25199	scaffold_0	12.239	4.13712	Ard1-PA	3L	3.44455	0.000179335	Dyak\GE21734	3L	7.24668	6.54478	Dyak\GE21734	3L	4.46738	2.98229	Dere\GG15426	scaffold_4784	14.6284	0.651266	Dana\GF10586	scaffold_13337	1.55785	17.7987	Dpse\GA11315	XR_group6	7.64605e-11	0.00305382	Dper\GL12574	dper_scaffold_27	63.8364	164.686	FBpp0274325-D1_1	Muller-AD	8.42758e-37	2.8746e-76	Dwil\GK17457	dwil_scf2_1100000004511	86.4433	134.07
vnc	st5		FBgn0263251			Dsim\GD14230	Scf_3L	90.7108	40.426	Dsec\GM25199	scaffold_0	12.239	4.13712	Ard1-PA	3L	3.44455	0.000179335	Dyak\GE21734	3L	7.24668	6.54478	Dyak\GE21734	3L	4.46738	2.98229	Dere\GG15426	scaffold_4784	14.6284	0.651266	Dana\GF10586	scaffold_13337	1.55785	17.7987	Dpse\GA11315	XR_group6	7.64605e-11	0.00305382	Dper\GL12574	dper_scaffold_27	63.8364	164.686	FBpp0274325-D1_1	Muller-AD	8.42758e-37	2.8746e-76	Dwil\GK17457	dwil_scf2_1100000004511	86.4433	134.07
Transitions mel_group to mel_subgroup
0 to 1
fz3	st2	X	FBgn0027343	4.91363	1.85568	Dsim\GD16528	Scf_X	3.69836	0.254515	Dsec\GM19089	scaffold_10	3.55532	0.490103	fz3-PB	X	2.62784	0.254848	Dyak\GE16636	X	3.43994	0.864576	Dyak\GE16636	X	3.3485	3.99164	Dere\GG12809	scaffold_4644	1.15798	4.46306	Dana\GF21196	scaffold_13117	0.0270386	0.419466	Dpse\GA14147	XL_group1a	0.0195253	0.461032	Dper\GL26757	dper_scaffold_25	0.285202	1.33748	FBpp0273532-D1_1	Muller-A	0.0746306	0.660215	Dwil\GK20092	dwil_scf2_1100000004515	0.0177641	0.126148
CG30441	st5	2R	FBgn0050441	1.08505	7.66107	Dsim\GD10361	Scf_2R	0.29642	0.285996	Dsec\GM11093	scaffold_59	0.142414	1.51421					Dyak\GE11244	v2_chr2L_random_028	9.22746	29.143	Dyak\GE11244	v2_chr2L_random_028	6.26654	17.519	Dere\GG10864	scaffold_4929	3.65315	3.68453	Dana\GF19927	scaffold_13340	0	0.20479	Dpse\GA15848	3	0.191912	2.61314	Dper\GL11048	dper_scaffold_2	0.101483	1.3558	FBpp0277223-D1_1	Contig411	2.34407	1.02822	Dwil\GK21369	dwil_scf2_1100000004513	3.1114e-14	0.922607
CG15482	st5	2L	FBgn0032483	0.183054	1.92396	Dsim\GD22079	Scf_2L	4.79832	8.84844	Dsec\GM25790	scaffold_16	9.767	5.03654	CG15482-PA	2L	0.302777	1.31864	Dyak\GE11853	2L	0	0	Dyak\GE11853	2L	9.66483	6.92154	Dere\GG10222	scaffold_4929	13.0559	6.67098	Dana\GF14334	scaffold_12916	0.0143447	8.46178e-128	Dpse\GA13762	4_group4	9.49692e-16	0.158131	Dper\GL26699	dper_scaffold_10	0.0050879	0.0815722	FBpp0287893-D1_1	Muller-B	0.0304475	0.667349
CG1246	st5	3L	FBgn0035360	0.0176839	5.93049	Dsim\GD13701	Scf_3L	0.00471899	4.56556	Dsec\GM14504	scaffold_2	0.0135662	0.95481	CG1246-PB	3L	0.121252	6.71401	Dyak\GE20332	3L	0.0114169	0.2463	Dyak\GE20332	3L	0	1.01763	Dere\GG14880	scaffold_4784	0	1.94431	Dana\GF24243	scaffold_13337	0	0.101891	Dpse\GA11646	XR_group3a	0	0.210879	Dper\GL22465	dper_scaffold_23	2.72732	1.11784	FBpp0276577-D1_1	Muller-AD	0	0.045087	Dwil\GK12662	dwil_scf2_1100000004729	0	0.374953
CG9121	st2	2L	FBgn0031675	0.125807	4.27289	Dsim\GD14930	Scf_2L	3.93245	2.34451	Dsec\GM18041	scaffold_5	8.81156	33.1122	CG9121-PA	2L	12.7844	42.1357	Dyak\GE18702	2L	12.7081	47.0071	Dyak\GE18702	2L	11.2874	43.4323	Dere\GG24323	scaffold_4929	10.0343	39.4045	Dana\GF14159	scaffold_12916	0.035644	0.160649	Dpse\GA21559	4_group4	0.0677557	8.41545	Dper\GL26478	dper_scaffold_10	13.4193	86.3576	FBpp0287567-D1_1	Muller-B	0.0177201	0.324853	Dwil\GK24150	dwil_scf2_1100000004585	0.0391625	8.10376
Abd-B	st5	3R	FBgn0000015	0.00791904	5.40519	Dsim\Abd-B	Scf_3R	0.0332497	1.79247	Dsec\Abd-B	scaffold_12	0.00415408	1.29367					Dyak\GE26123	3R	0	2.4881	Dyak\GE26123	3R	0.0739507	2.09021	Dere\GG16806	scaffold_4770	0	1.38601	Dana\GF17921	scaffold_13340	0	0.0990853	Dpse\GA11117	2	0.0437169	0.772637	Dper\GL23001	dper_scaffold_0	0.0634714	1.31466	FBpp0302551-D1_1	Muller-E	0.00788725	0.510573	Dwil\GK13851	dwil_scf2_1100000004943	0.00856793	0.686157
Ect4	st2	3L	FBgn0262579	11.9118	3.93997	Dsim\GD14050	Scf_3L	10.2709	1.40292	Dsec\GM25015	scaffold_0	20.512	6.36122	Ect4-PI	3L	13.7363	2.40384	Dyak\GE21654	3L	20.9829	5.96856	Dyak\GE21654	3L	19.1188	9.53769	Dere\GG14467	scaffold_4784	16.7099	5.34163	Dana\GF23954	scaffold_13337	1.18228	4.67398	Dpse\GA28610	XR_group8	0.339173	2.90921	Dper\GL25411	dper_scaffold_45	0.54922	5.14951	FBpp0286996-D1_1	Muller-AD	0.0736113	0.392977	Dwil\GK19935	dwil_scf2_1100000004540	0.0473733	3.62165
CG5337	st2	2L	FBgn0032249	2.44883	6.04127	Dsim\GD22256	Scf_2L	0.47134	3.2955	Dsec\GM11658	scaffold_3	29.9253	24.8741	CG5337-PA	2L	52.8457	222.624	Dyak\GE25921	2L	0.829874	6.93549	Dyak\GE25921	2L	5.0159	6.59156	Dere\GG23929	scaffold_4929	1.64902	2.11362	Dana\GF14096	scaffold_12916	0.753215	4.44143					Dper\GL19000	dper_scaffold_1	0.0781586	6.82539					Dwil\GK14875	dwil_scf2_1100000004521	1.60206e-216	8.58571e-42
tty	st5	X	FBgn0015558	0.541196	16.3928					Dsec\GM22627	scaffold_8	0.00836196	12.5608	tty-PA	X	0.0569684	10.0717	Dyak\GE15303	X	0.00167653	13.4968	Dyak\GE15303	X	0.0289167	8.06436	Dere\GG17543	scaffold_4690	0.0112928	14.2045	Dana\GF22440	scaffold_13248	0.0968901	0.510894	Dpse\GA14222	XL_group1e	0.00274512	0.0911627	Dper\GL19902	dper_scaffold_18	0.00217127	0.0317767	FBpp0286372-D1_1	Muller-A	0.00251794	0.0576409	Dwil\GK19929	dwil_scf2_1100000004515	0.171717	0.316677
Jhe	st5	2R	FBgn0010052	0	6.80053	Dsim\GD11161	Scf_2R	0	0.657599	Dsec\GM21661	scaffold_1	0	5.89926	Jhe-PA	2R	0	9.86752	Dyak\GE11755	2R	0	4.8602	Dyak\GE11755	2R	0	2.72272	Dere\GG20569	scaffold_4845	0.0160076	6.5914	Dana\GF11293	scaffold_13266	0	0.546767	Dpse\GA25124	3	0	0.119908	Dper\GL20599	dper_scaffold_34	0	2.07845
Ir25a	st5	2L	FBgn0031634	0.0130519	2.97676	Dsim\GD22688	Scf_2L	0.0238923	0.801042	Dsec\GM18071	scaffold_5	0.00460357	3.78032	Ir25a-PB	2L	1.70953	5.4431	Dyak\GE14671	2L	0.00994984	2.5284	Dyak\GE14671	2L	0	6.67569	Dere\GG24350	scaffold_4929	0	2.14516	Dana\GF14416	scaffold_12916	0	0.846296	Dpse\GA13857	4_group3	0.00287671	0.0691397	Dper\GL18750	dper_scaffold_1	0	0.00714978	FBpp0280058-D1_1	Muller-B	0.00247138	0.17773	Dwil\GK24583	dwil_scf2_1100000004585	0.00361255	0.302817
Mks1	st2	X	FBgn0030395	0.0230599	0.057331	Dsim\GD15930	Scf_X	8.82515	0.0792168	Dsec\GM11550	scaffold_21	14.5593	0.543122					Dyak\GE16213	X	6.59805	0.592749	Dyak\GE16213	X	1.06575	0.0181948	Dere\GG19551	scaffold_4690	3.04597	0.0670781	Dana\GF22238	scaffold_12929	0	0.0167989	Dpse\GA13919	XL_group1a	0.011975	0.698082	Dper\GL25370	dper_scaffold_12	0.153568	0.293666	FBpp0272975-D1_1	Muller-AD	0.00671194	0.144853	Dwil\GK16128	dwil_scf2_1100000004590	0	0.0522022
CG3940	st2	3R	FBgn0037788	16.2682	4.66577	Dsim\GD18670	Scf_3R	15.5835	7.02377	Dsec\GM23862	scaffold_0	20.637	5.83119	CG3940-PA	3R	7.62087	4.50615	Dyak\GE26013	3R	18.0943	18.8115	Dyak\GE26013	3R	15.6325	24.9726	Dere\GG17412	scaffold_4770	15.4912	23.3206	Dana\GF17859	scaffold_13340	0.0146195	28.6684	Dpse\GA17790	2	0.0099853	8.12273	Dper\GL27210	dper_scaffold_19	0	6.59587	FBpp0282662-D1_1	Muller-E	0.0189479	9.11351	Dwil\GK10881	dwil_scf2_1100000004902	0	1.12995
CG9503	st2	X	FBgn0030598	2.21681	0.105565					Dsec\GM12016	scaffold_32	0.103066	0.161219	CG9503-PA	X	10.0578	0.0423645	Dyak\GE16081	X	12.735	0.187996	Dyak\GE16081	X	11.4848	0.746635	Dere\GG19429	scaffold_4690	12.4504	0.732795	Dana\GF19422	scaffold_13335	0.598418	0.4831	Dpse\GA21838	XL_group1a	0.324192	0.0273275	Dper\GL27078	dper_scaffold_63	1.11091	0.030825	FBpp0272814-D1_1	Muller-A	0.102062	0.0218628	Dwil\GK19736	dwil_scf2_1100000004515	0.04911	0.00570321
CG13924	st5	3L	FBgn0035286	0.0142761	1.69128	Dsim\GD13655	Scf_3L	0.0188829	1.36189	Dsec\GM14455	scaffold_2	0.0189721	0.149366	CG13924-PC	3L	0	0.72642	Dyak\GE21196	3L	0.663316	1.35003	Dyak\GE21196	3L	0	0.505902	Dere\GG14833	scaffold_4784	6.03322	16.3538	Dana\GF24844	scaffold_13337	0.0106042	0.189728	Dpse\GA12629	XR_group6	1.26481e-123	0.75308	Dper\GL25315	dper_scaffold_9	0	0.0512203	FBpp0275125-D1_1	Muller-AD	0	0	Dwil\GK12209	dwil_scf2_1100000004762	0.00317294	0.0663637
Rh4	st5	3L	FBgn0003250	0.0870893	10.4742	Dsim\GD12438	Scf_3L	0.0293384	2.06634	Dsec\GM24362	scaffold_0	43.1114	35.4265	Rh4-PA	3L	0.178104	4.08371	Dyak\GE22185	3L	1.48202	4.35786	Dyak\GE22185	3L	0.247462	1.58307	Dere\Rh4	scaffold_4784	0.0407014	1.37103	Dana\GF10499	scaffold_13337	0.028901	0.257666	Dpse\Rh4	XR_group8	0.0146024	1.93826	Dper\GL20699	dper_scaffold_29	0.00332938	0.101945	FBpp0286219-D1_1	Muller-AD	0.00682053	0.0404182	Dwil\Rh4	dwil_scf2_1100000004540	0.0452296	0.402251
CG42399	st5	2L	FBgn0259818	0.895544	6.39464	Dsim\GD22984	Scf_2L	1.6037	5.94315	Dsec\GM16695	scaffold_14	1.73946	7.39874	CG42399-PB	2L	3.24278	11.1036	Dyak\GE16405	2L	0.689655	14.9139	Dyak\GE16405	2L	0.617177	13.8867	Dere\GG24677	scaffold_4929	0.343886	29.1579	Dana\GF15042	scaffold_12916	0.00451887	0.19885	Dpse\GA18328	4_group2	0.00324827	0.277161	Dper\GL16505	dper_scaffold_8	0.00381067	0.767946	FBpp0285191-D1_1	Muller-B	0.00364132	2.16011	Dwil\GK24451	dwil_scf2_1100000004585	0.0204025	0.156212
out	st2	X	FBgn0259834	28.7907	1.19265	Dsim\GD15584	Scf_X	24.9224	2.24843	Dsec\GM22746	scaffold_8	40.4922	10.3367	out-PA	X	45.5278	9.7117	Dyak\GE17394	X	24.425	5.97952	Dyak\GE17394	X	51.0969	2.31377	Dere\GG18060	scaffold_4690	21.5514	1.04862	Dana\GF15996	scaffold_12903	0.0171305	1.83497	Dpse\GA20797	XL_group1e	0.0277351	16.3676	Dper\GL13010	dper_scaffold_13	0.0254768	46.1615					Dwil\GK19798	dwil_scf2_1100000004515	0.00356888	2.09792
Cyp4d14	st5	X	FBgn0023541	0.00724743	0.194556	Dsim\GD16387	Scf_X	0.207588	5.20629	Dsec\GM18911	scaffold_10	0.215639	7.14463	Cyp4d14-PA	X	0.0415896	12.4371	Dyak\GE16972	X	0.0341365	5.90914	Dyak\GE16972	X	0.109005	1.21189	Dere\GG12644	scaffold_4644	0.0144965	9.93808	Dana\GF21979	scaffold_12929	0	0.0776549	Dpse\GA17510	XL_group1a	0	0.116711	Dper\GL13400	dper_scaffold_26	0.0023319	0.603714	FBpp0273155-D1_1	Muller-A	0	0.369464	Dwil\GK17014	dwil_scf2_1100000004963	0.00256844	0.0182095
CG32815	st5	X	FBgn0052815	0.162369	12.7917	Dsim\GD15745	Scf_X	0.0604194	2.6609	Dsec\GM19100	scaffold_10	4.17151	7.09286					Dyak\GE16650	X	5.30205	3.66857	Dyak\GE16650	X	2.17517	1.74625	Dere\GG12819	scaffold_4644	9.1628	7.2451	Dana\GF22116	scaffold_12929	0	0.103724	Dpse\GA22403	XL_group3a	4.47406	11.2665	Dper\GL14212	dper_scaffold_11	1.13018	1.0024	FBpp0272378-D1_1	Muller-AD	0.0860446	0.314552	Dwil\GK24970	dwil_scf2_1100000004909	0.00607501	0.044788
Cpr47Eg	st5	2R	FBgn0086519	0	2.66374	Dsim\GD25926	Scf_2R	0.0413729	0.403065	Dsec\GM20458	scaffold_1	0	1.26076	Cpr47Eg-PA	2R	0	2.43113	Dyak\GE13036	2R	0	0.107864	Dyak\GE13036	2R	0	1.55209	Dere\GG22680	scaffold_4845	0	3.8078	Dana\GF12422	scaffold_13266	5.98122e-09	5.05488e-05	Dpse\GA21517	3	0	0.356929	Dper\GL16747	dper_scaffold_4	9.82036e-12	4.41263e-05					Dwil\GK21625	dwil_scf2_1100000004513	0	0
bol	st2	3L	FBgn0011206	0.995251	9.89359					Dsec\GM24891	scaffold_0	7.89389	7.2938	bol-PB	3L	2.95493	8.98587	Dyak\GE21261	3L	5.88482	10.2527	Dyak\GE21261	3L	2.5285	7.78772	Dere\GG15038	scaffold_4784	2.04196	9.72683	Dana\GF23585	scaffold_13337	0.0240962	1.53345	Dpse\GA18412	XR_group5	0.650686	4.33924	Dper\GL15077	dper_scaffold_67	19.1428	71.7869	FBpp0288271-D1_1	Muller-AD	0.374654	2.43315	Dwil\GK24376	dwil_scf2_1100000004837	0.0177772	0.428996
CG3618	st2	3L	FBgn0037028	15.2093	61.9138	Dsim\GD12158	Scf_3L	3.06985	10.8978	Dsec\GM22183	scaffold_11	0.326212	0.294427	CG3618-PA	3L	8.19841	11.3073	Dyak\GE22376	3L	11.136	36.3891	Dyak\GE22376	3L	20.0787	61.0285	Dere\GG13279	scaffold_4784	6.47233	16.1565	Dana\GF10203	scaffold_13337	0.0404372	0.195206	Dpse\GA17562	XR_group6	0.0355142	0.17705	Dper\GL26323	dper_scaffold_12	0.414784	0.143134	FBpp0274881-D1_1	Muller-AD	0.00499839	0.0350778	Dwil\GK13540	dwil_scf2_1100000004762	0.622559	2.06474
Pal2	st5	2R	FBgn0262728	0.00970886	0.0588974	Dsim\GD11785	Scf_2R	0	1.75461	Dsec\GM16037	scaffold_9	0.0143077	1.48204	Pal-PA	2R	0.0652629	1.55112	Dyak\GE14315	2R	0.357096	3.70954	Dyak\GE14315	2R	0.264181	3.88369	Dere\GG22877	scaffold_4845	0.0588432	1.58969	Dana\GF13074	scaffold_13266	0	0.457714	Dpse\GA18906	3	0.0109154	0.0087486	Dper\GL16880	dper_scaffold_4	0.00388248	0.0143726	FBpp0276451-D1_1	Muller-C	0	0.176367	Dwil\GK23070	dwil_scf2_1100000004954	0.360937	0.295519
Fas2	st5	X	FBgn0000635	0.148669	2.53732	Dsim\Fas2	Scf_X	0.807647	4.35452	Dsec\GM12701	scaffold_4	0.446202	2.38827	Fas2-PA	X	8.93179	22.0598	Dyak\GE16870	X	0.0606995	4.75095	Dyak\GE16870	X	0.125614	5.94945	Dere\GG18558	scaffold_4690	0.432864	1.91881	Dana\Fas2	scaffold_13117	0	0.259566	Dpse\GA17599	XL_group3a	0.0374864	1.19227	Dper\GL14196	dper_scaffold_11	1.11906	2.73034	FBpp0272362-D1_1	Muller-AD	0.168169	0.457969	Dwil\GK17610	dwil_scf2_1100000004963	0.0161158	0.0842937
CG3703	st2	X	FBgn0040348	3.40105	0.204422	Dsim\GD16446	Scf_X	1.60644	0.136394	Dsec\GM19009	scaffold_10	5.10295	0.424192	CG3703-PA	X	4.63938	0.12444	Dyak\GE16555	X	1.1937	0.228531	Dyak\GE16555	X	1.73632	0.327646	Dere\GG12729	scaffold_4644	4.21994	0.191926	Dana\GF22047	scaffold_12929	0.155515	0.429519	Dpse\GA17626	XL_group3a	0.00379398	0.132304	Dper\GL14418	dper_scaffold_11	0.0139723	1.77869	FBpp0272087-D1_1	Muller-AD	0.0178189	0.0439809	Dwil\GK10170	dwil_scf2_1100000004909	0.0568419	0.0254927
CG4020	st2	X	FBgn0029821	1.86687	6.39351	Dsim\GD16765	Scf_X	2.79903	8.15299	Dsec\GM12448	scaffold_4	9.06075	5.87126	CG4020-PA	X	5.6885	11.894	Dyak\GE17559	X	1.4583	0.93871	Dyak\GE17559	X	7.41823	6.56282	Dere\GG18798	scaffold_4690	6.87479	5.00698	Dana\GF22078	scaffold_12929	0.234218	0.050939	Dpse\GA17875	XL_group1e	0.257774	0.196412					FBpp0281851-D1_1	Muller-A	0.0443367	0.242547	Dwil\GK20125	dwil_scf2_1100000004515	0.10886	0.0674283
CG4020	st5	X	FBgn0029821	1.86687	6.39351	Dsim\GD16765	Scf_X	2.79903	8.15299	Dsec\GM12448	scaffold_4	9.06075	5.87126	CG4020-PA	X	5.6885	11.894	Dyak\GE17559	X	1.4583	0.93871	Dyak\GE17559	X	7.41823	6.56282	Dere\GG18798	scaffold_4690	6.87479	5.00698	Dana\GF22078	scaffold_12929	0.234218	0.050939	Dpse\GA17875	XL_group1e	0.257774	0.196412					FBpp0281851-D1_1	Muller-A	0.0443367	0.242547	Dwil\GK20125	dwil_scf2_1100000004515	0.10886	0.0674283
CG34382	st5	3L	FBgn0085411	0.0203942	1.36033	Dsim\GD14223	Scf_3L	0.101254	3.78421	Dsec\GM25191	scaffold_0	0.0643546	3.90779	CG34382-PC	3L	0.159988	4.97081	Dyak\GE21726	3L	0.00236498	1.07315	Dyak\GE21726	3L	0.290581	23.9387	Dere\GG15418	scaffold_4784	0.00616229	1.04602	Dana\GF10579	scaffold_13337	0	0.131291	Dpse\GA12798	XR_group6	0.121593	0.17436					FBpp0274318-D1_1	Muller-AD	0.00423421	0.785138	Dwil\GK19264	dwil_scf2_1100000004511	0.00607071	0.542205
CG15312	st2	X	FBgn0030174	32.9402	10.9995	Dsim\GD16042	Scf_X	26.0845	24.1565	Dsec\GM11338	scaffold_15	35.2597	10.6444	CG15312-PB	X	39.2167	45.157	Dyak\GE15419	X	1.31292	0.374132	Dyak\GE15419	X	0.241018	0.273832	Dere\GG18947	scaffold_4690	9.91664	1.78347	Dana\GF19154	scaffold_13047	0	0.214121	Dpse\GA13639	XL_group3a	0.115723	0.0934247	Dper\GL16590	dper_scaffold_15	0.0332341	0.0776202	FBpp0272166-D1_1	Muller-A	0.00624741	0.0378094	Dwil\GK25109	dwil_scf2_1100000004909	0	0
CG5731	st5	2L	FBgn0032192	0.0236736	1.84028	Dsim\GD22296	Scf_2L	0	0.96903	Dsec\GM11946	scaffold_3	0	2.46275	CG5731-PA	2L	0	1.34882	Dyak\GE26351	2L	0.312963	1.89686	Dyak\GE26351	2L	0.0156714	0.274732	Dere\GG23972	scaffold_4929	0	1.81915	Dana\GF14131	scaffold_12916	0	0.746534	Dpse\GA27712	4_group2	0	0.0448878	Dper\GL18985	dper_scaffold_1	0.00485232	0.134864	FBpp0285137-D1_1	Muller-B	0	0	Dwil\GK15268	dwil_scf2_1100000004521	0.0146151	0.530351
ovo	st5	X	FBgn0003028	46.2484	5.53434	Dsim\GD24377	Scf_X	60.5455	8.66856	Dsec\GM12381	scaffold_4	50.9756	3.92701	ovo-PB	X	55.8183	8.22673	Dyak\GE16381	X	41.6296	4.18962	Dyak\GE16381	X	42.4397	13.8938	Dere\GG18741	scaffold_4690	118.503	20.8862	Dana\GF20355	scaffold_13417	18.6278	1.2356	Dpse\GA22634	XL_group1e	28.1399	1.79916	Dper\GL26817	dper_scaffold_25	70.2389	1.7111	FBpp0272717-D1_1	Muller-A	34.3281	1.82038	Dwil\GK10250	dwil_scf2_1100000004909	35.7141	2.31963
nan	st5	3L	FBgn0036414	0.0285552	3.97566	Dsim\GD12626	Scf_3L	0.152404	2.16876	Dsec\GM24554	scaffold_0	0.0394712	1.58463	nan-PA	3L	0.272488	1.97893	Dyak\GE20026	3L	0.126875	2.42469	Dyak\GE20026	3L	0.028606	2.856	Dere\GG13732	scaffold_4784	0.0061209	1.41137	Dana\GF25203	scaffold_13337	0	0.405453	Dpse\GA23523	XR_group6	0.00748965	0.296836	Dper\GL24830	dper_scaffold_9	0.00300818	0.644658	FBpp0274450-D1_1	Muller-AD	0.0118262	0.393422	Dwil\GK17142	dwil_scf2_1100000004511	0.0812167	0.253418
Cals	st2	4	FBgn0039928	6.73531	87.7071					Dsec\GM13009	scaffold_40	45.0511	89.2467	cals-PA	4	1.79359	16.3305	Dyak\GE14487	4	10.4604	21.435	Dyak\GE14487	4	5.64747	18.5358	Dere\GG16418	scaffold_4512	25.0566	43.6116	Dana\GF20627	scaffold_12928	0	12.3042					Dper\GL18378	dper_scaffold_51	0.00475131	10.841					Dwil\GK13705	dwil_scf2_1100000004943	0.666151	158.439
OSCP1	st2	2R	FBgn0033685	1.13125	0.669259	Dsim\GD25858	Scf_2R	294.438	1050.88	Dsec\GM20385	scaffold_1	0.496114	0.679367					Dyak\GE13475	2R	10.8669	45.905	Dyak\GE13475	2R	0.586331	1.45516	Dere\GG22607	scaffold_4845	7.33774	24.1386	Dana\GF12643	scaffold_13266	0	0.115456	Dpse\GA12098	3	0.041519	0.43781	Dper\GL17481	dper_scaffold_4	0.0613503	0.270098	FBpp0276108-D1_1	Muller-C	0.147263	0.760524	Dwil\GK19493	dwil_scf2_1100000004512	0.00902807	0.0105263
RhoGEF64C	st2	3L	FBgn0035574	0.196981	0.853988	Dsim\GD13862	Scf_3L	30.2326	0.917445	Dsec\GM14680	scaffold_2	33.5613	2.07508	Gef64C-PA	3L	6.8581	0.656633	Dyak\GE21468	3L	4.17316	0.32776	Dyak\GE21468	3L	9.07928	0.737381	Dere\GG15246	scaffold_4784	34.6333	1.78364	Dana\GF25091	scaffold_13337	0.00438601	0.0289937	Dpse\GA28539	XR_group8	0.103503	0.798351	Dper\GL17915	dper_scaffold_24	1.14776	3.73971	FBpp0286817-D1_1	Muller-AD	0.234223	0.798318	Dwil\GK16599	dwil_scf2_1100000004511	0.00594385	0.15515
CG14314	st5	3R	FBgn0038581	0.285052	0.651571	Dsim\GD19214	Scf_3R	1.47063	1.4553	Dsec\GM15287	scaffold_12	0.115821	8.01218	CG14314-PA	3R	3.00134	2.56619	Dyak\GE25520	3R	0.149274	4.32749	Dyak\GE25520	3R	0.467905	2.07886	Dere\GG22726	scaffold_4770	1.97075	4.40268	Dana\GF18512	scaffold_13340	3.34463	0.866576	Dpse\GA12901	2	0.0057276	0.42984	Dper\GL12598	dper_scaffold_6	0.0157716	0.132689	FBpp0284896-D1_1	Muller-E	0.104837	0.153315	Dwil\GK11249	dwil_scf2_1100000004902	0.00393839	0.0160766
CG3788	st2	2R	FBgn0034800	8.13317	13.651	Dsim\GD25095	Scf_2R	7.30685	12.9204	Dsec\GM15599	scaffold_9	213.634	196.05	CG3788-PA	2R	265.714	276.482	Dyak\GE11621	2R	60.8581	124.628	Dyak\GE11621	2R	3.98603	9.37736	Dere\GG20084	scaffold_4845	17.8087	47.4551	Dana\GF11317	scaffold_13266	0.227958	0.615177					Dper\GL23743	dper_scaffold_0	0	0.0734244					Dwil\GK15591	dwil_scf2_1100000004521	0.00351318	0.0342442
CG3788	st5	2R	FBgn0034800	8.13317	13.651	Dsim\GD25095	Scf_2R	7.30685	12.9204	Dsec\GM15599	scaffold_9	213.634	196.05	CG3788-PA	2R	265.714	276.482	Dyak\GE11621	2R	60.8581	124.628	Dyak\GE11621	2R	3.98603	9.37736	Dere\GG20084	scaffold_4845	17.8087	47.4551	Dana\GF11317	scaffold_13266	0.227958	0.615177					Dper\GL23743	dper_scaffold_0	0	0.0734244					Dwil\GK15591	dwil_scf2_1100000004521	0.00351318	0.0342442
CG14570	st5	3L	FBgn0037122	0.0247894	9.27404	Dsim\GD12093	Scf_3L	0.0482119	7.51255	Dsec\GM22116	scaffold_11	0.0697727	5.37749	CG14570-PA	3L	0.0393802	5.21143	Dyak\GE22987	v2_chr3L_random_019	0	4.62329	Dyak\GE22987	v2_chr3L_random_019	0	4.92653	Dere\GG13207	scaffold_4784	0.0939784	13.0725	Dana\GF24641	scaffold_13337	0	0.816089	Dpse\GA13089	XR_group6	0.166151	0.875731	Dper\GL25277	dper_scaffold_9	0.0140531	2.10361	FBpp0275095-D1_1	Muller-AD	0	0.390741	Dwil\GK17127	dwil_scf2_1100000004511	0.0185374	0.793727
CG42666	st2	X	FBgn0261548	3.88963	32.6755	Dsim\GD16572	Scf_X	5.54187	38.0625	Dsec\GM19170	scaffold_10	6.55721	38.2023					Dyak\GE16711	X	19.4083	48.3453	Dyak\GE16711	X	4.66146	22.8692	Dere\GG12883	scaffold_4644	1.24666	24.303	Dana\GF21199	scaffold_13117	0.0716154	22.6431	Dpse\GA13257	XL_group1a	0.415448	30.9411	Dper\GL26761	dper_scaffold_25	0.320684	77.9005					Dwil\GK20067	dwil_scf2_1100000004515	0.0873041	26.8542
CG15642	st5	X	FBgn0030642	2.31148	6.38428	Dsim\GD24500	Scf_X	0.374314	2.77703	Dsec\GM19536	scaffold_73	3.22458	13.6226					Dyak\GE16045	X	0.19424	4.3979	Dyak\GE16045	X	0	3.32679	Dere\GG19399	scaffold_4690	0.104353	4.2246	Dana\GF21905	scaffold_12929	0.0335346	0.363242	Dpse\GA22831	XL_group1a	1.5844e-30	0.239848	Dper\GL13308	dper_scaffold_26	4.0669e-66	4.408e-84					Dwil\GK25478	dwil_scf2_1100000004909	0.110944	0.434947
uzip	st2	2R	FBgn0004055	4.66548	22.6257	Dsim\GD11916	Scf_2R	33.1	26.4751	Dsec\GM11920	scaffold_23	1.11101	36.5085	uzip-PA	2R	2.83674	17.2803	Dyak\GE14462	2R	2.33784	53.0346	Dyak\GE14462	2R	1.01065	57.7789	Dere\GG23028	scaffold_4845	1.93276	92.9065	Dana\GF13359	scaffold_13266	0.503018	2.98878	Dpse\GA17506	3	0.311378	14.264	Dper\GL17642	dper_scaffold_4	0.316556	23.8293	FBpp0278062-D1_1	Muller-C	0.71418	22.9818	Dwil\GK21574	dwil_scf2_1100000004513	0.582224	5.27992
CG34124	st5	2L	FBgn0083960	0.0118915	1.03466	Dsim\GD23311	Scf_2L	0.0734056	2.28303	Dsec\GM18507	scaffold_5	3.62169	7.81678	CG34124-PA	2L	0.271904	2.46284	Dyak\GE11270	2L	3.87066	11.8116	Dyak\GE11270	2L	12.3919	37.1834	Dere\GG25033	scaffold_4929	20.296	80.274	Dana\GF23613	scaffold_12943	0.0935945	1.1639	Dpse\GA16369	4_group4	0.264585	1.47187	Dper\GL26534	dper_scaffold_10	0.227497	1.13761	FBpp0287734-D1_1	Muller-B	0.49006	0.816381	Dwil\GK24476	dwil_scf2_1100000004585	0.403166	0.244883
PGRP-SB1	st5	3L	FBgn0043578	2.57846e-13	1.03328	Dsim\PGRP-SB1	Scf_3L	0.109434	0	Dsec\GM24370	scaffold_0	0.0369918	3.26106	PGRP-SB1-PA	3L	0.305382	2.60205	Dyak\GE22193	3L	2.46238e-34	4.02255e-07	Dyak\GE22193	3L	0.150733	11.1194	Dere\GG15854	scaffold_4784	3.45321e-20	4.37522	Dana\GF10506	scaffold_13337	0.127215	0.955501	Dpse\GA21961	XR_group8	5.52316e-34	3.65729e-21	Dper\GL13224	dper_scaffold_38	0.400696	1.35513					Dwil\GK17343	dwil_scf2_1100000004511	0.0163503	0.343398
CG9926	st2	3R	FBgn0038190	17.0894	0.649989	Dsim\GD20466	Scf_3R	8.74359	0.0362658	Dsec\GM25896	scaffold_0	53.7549	2.17596	CG9926-PA	3R	61.6155	0.677375	Dyak\GE24404	3R	52.1023	0.144369	Dyak\GE24404	3R	63.4082	0.88404	Dere\GG17011	scaffold_4770	35.1671	0.916387	Dana\GF18898	scaffold_13340	0.204117	4.02068	Dpse\GA22129	2	0	1.09112					FBpp0292765-D1_1	Muller-E	0	0.25636	Dwil\GK22679	dwil_scf2_1100000004921	0.0157702	0.182017
CG43345	st2		FBgn0263050							Dsec\GM23269	scaffold_18	24.767	107.252					Dyak\GE12996	2R	12.5798	11.2868	Dyak\GE12996	2R	7.37517	13.519	Dere\GG21517	scaffold_4845	10.9431	20.5495	Dana\GF15153	scaffold_12916	4.60468e-40	3.31605	Dpse\GA21638	4_group1	0.10427	2.72825	Dper\GL25859	dper_scaffold_5	0.760086	3.01437	FBpp0279496-D1_1	Muller-B	1.57536	1.67451	Dwil\GK21048	dwil_scf2_1100000004851	0.968476	0.904438
1 to 0
CG17544	st5	2L	FBgn0032775	10.1093	0.172608	Dsim\GD21764	Scf_2L	0.251169	0.25374	Dsec\GM17014	scaffold_7	11.2031	2.98471	CG17544-PA	2L	0.106264	0.143266	Dyak\GE12655	2R	0	0.154598	Dyak\GE12655	2R	0.0170381	0.0178309	Dere\GG21636	scaffold_4845	0.0321711	0.176938	Dana\GF15197	scaffold_12916	0	8.64388	Dpse\GA14550	4_group4	0.188125	6.6101	Dper\GL21109	dper_scaffold_16	3.04073e-201	3.97013	FBpp0288004-D1_1	Muller-B	0.136553	19.6412	Dwil\GK23839	dwil_scf2_1100000004516	0.0994989	69.6525
CG7328	st5	3L	FBgn0036942	9.63157	0.818398	Dsim\GD12218	Scf_3L	6.2922	0.755342	Dsec\GM22247	scaffold_11	10.1408	0.769316	CG7328-PA	3L	5.99742	7.31331									Dere\GG13341	scaffold_4784	2.59353	0.082249	Dana\GF24486	scaffold_13337	11.7725	2.80442	Dpse\GA20264	XR_group6	4.68167	14.8417	Dper\GL25057	dper_scaffold_9	1.19756	3.18806					Dwil\GK17250	dwil_scf2_1100000004511	10.1333	5.08874
Dysb	st5	3L	FBgn0036819	10.9086	0.168212	Dsim\GD14774	Scf_3L	10.495	0.218439	Dsec\GM14997	scaffold_19	1.32393e-06	8.96571e-12	dysb-PA	3L	3.13784	3.25417									Dere\GG16007	scaffold_4784	2.37438e-06	2.49992e-09	Dana\GF23643	scaffold_13337	17.2831	3.51858	Dpse\GA19908	XR_group6	2.17651	0.661277	Dper\GL21438	dper_scaffold_2993	254.167	465.854	FBpp0274510-D1_1	Muller-AD	1.88322e-06	1.57196	Dwil\GK20446	dwil_scf2_1100000004768	5.10435	0
Hr78	st5	3L	FBgn0015239	25.4799	5.90626e-66	Dsim\GD12114	Scf_3L	19.2101	0.110561	Dsec\GM22136	scaffold_11	33.4282	0.392929	Hr78-PC	3L	28.3221	1.26152									Dere\GG13230	scaffold_4784	75.1086	0.428936	Dana\GF10710	scaffold_13337	26.7012	2.41741	Dpse\GA20175	XR_group8	32.2212	4.86778	Dper\GL12781	dper_scaffold_40	47.6146	3.31501	FBpp0286064-D1_1	Muller-AD	33.9704	2.74146	Dwil\GK25684	dwil_scf2_1100000004762	20.4493	1.94643
CG15117	st2	2R	FBgn0034417	0.178143	0.0315119	Dsim\GD25338	Scf_2R	0.227642	0.106337	Dsec\GM19850	scaffold_1	0.158714	0	CG15117-PB	2R	0.128852	0	Dyak\GE13860	2R	6.70036	0.0108529	Dyak\GE13860	2R	0.882571	0.0196445	Dere\GG20922	scaffold_4845	0.252825	0.0492614	Dana\GF11492	scaffold_13266	2.06292	1.33864	Dpse\GA13505	3	7.06279	2.58442	Dper\GL11760	dper_scaffold_37	11.255	1.01422	FBpp0275723-D1_1	Muller-C	11.84	2.82691	Dwil\GK17841	dwil_scf2_1100000004822	1.9321	0.0568377
bgcn	st5	2R	FBgn0004581	0.0821796	1.58712					Dsec\GM15503	scaffold_9	0.178189	0.43279	bgcn-PA	2R	0.149351	0.774449	Dyak\bgcn	2R	16.7175	0.481481	Dyak\bgcn	2R	0.26848	0.291032	Dere\bgcn	scaffold_4845	0.0923463	0.236822	Dana\GF12453	scaffold_13266	16.0962	1.33251	Dpse\GA15695	3	16.6413	26.6167	Dper\GL10928	dper_scaffold_2	12.6234	72.3895	FBpp0277096-D1_1	Muller-C	70.6597	89.5287	Dwil\GK15867	dwil_scf2_1100000004514	6.84683	1.60834
CG12207	st5	3R	FBgn0038220	33.0049	0.337355	Dsim\GD18952	Scf_3R	26.2002	0.262759	Dsec\GM24156	scaffold_0	28.8103	0.363453	CG12207-PB	3R	33.7826	0.259788	Dyak\GE24226	3R	39.7892	0.290795	Dyak\GE24226	3R	38.809	0.460275	Dere\GG16845	scaffold_4770	33.0772	0.153853	Dana\GF16161	scaffold_13340	25.7061	8.67165	Dpse\GA11477	2	24.815	12.4654	Dper\GL23268	dper_scaffold_0	39.9609	20.9068					Dwil\GK11342	dwil_scf2_1100000004902	57.0447	11.0183
CG42668	st5	3R	FBgn0261550	19.8977	1.19386	Dsim\GD19346	Scf_3R	27.6369	2.80627	Dsec\GM23106	scaffold_27	35.572	2.56135	CG42668-PG	3R	22.1959	2.24627									Dere\GG23845	scaffold_4770	21.6688	0.881177	Dana\GF23022	scaffold_12911	18.4283	4.48185	Dpse\GA30150	2	7.43599	4.53688	Dper\GL23461	dper_scaffold_0	14.7014	8.77375	FBpp0298254-D1_1	Muller-E	13.759	45.8594	Dwil\GK22444	dwil_scf2_1100000004921	31.9224	14.7629
APC7	st5	X	FBgn0029879	55.8307	0.7831	Dsim\GD16808	Scf_X	53.3924	0.19177	Dsec\GM12502	scaffold_4	8.14794	6.36461e-47					Dyak\GE16759	X	86.0959	0.829716	Dyak\GE16759	X	58.4456	0.347453	Dere\GG19598	scaffold_4690	56.4749	0.258812	Dana\GF22268	scaffold_12929	42.0884	1.17592	Dpse\GA22864	XL_group1a	49.0343	21.3254	Dper\GL13341	dper_scaffold_26	49.8705	24.1628	FBpp0273183-D1_1	Muller-A	29.7581	16.129	Dwil\GK25583	dwil_scf2_1100000004909	46.2292	21.9631
E(spl)mdelta-HLH	st5	3R	FBgn0002734	0	0.281196	Dsim\HLHmdelta	Scf_3R	0.0470204	0.244884	Dsec\GM10293	scaffold_13	0.397974	0.33098	HLHmdelta-PA	3R	0	1.85557	Dyak\HLHmdelta	3R	0	0.808214	Dyak\HLHmdelta	3R	0	0.5019	Dere\GG11449	scaffold_4820	0	0.283091	Dana\GF16795	scaffold_13340	0	1.13436	Dpse\GA20991	2	0.0387838	4.19803	Dper\GL21813	dper_scaffold_3	0	1.08497					Dwil\GK14454	dwil_scf2_1100000004943	0	1.58524
Tpi	st5	3R	FBgn0086355	144.381	0.835858	Dsim\Tpi	Scf_3R	125.873	0.658776	Dsec\GM12179	scaffold_4	84.4702	0.838969	Tpi-PA	3R	21.1135	0.252085	Dyak\Tpi	3R	122.823	1.27297	Dyak\Tpi	3R	45.7133	0.674571	Dere\GG11962	scaffold_4820	103.86	0.778681	Dana\GF16201	scaffold_13340	201.749	1.64367	Dpse\Tpi	2	72.2287	375.413	Dper\GL14069	dper_scaffold_7	191.366	692.396	FBpp0292271-D1_1	Muller-E	173.215	625.133	Dwil\GK13151	dwil_scf2_1100000004943	310.115	8.1906
CG10979	st5	3R	FBgn0037379	35.4214	2.05086	Dsim\GD19823	Scf_3R	28.1799	0.238799	Dsec\GM10842	scaffold_6	47.1812	0.551976	CG10979-PA	3R	22.1948	0.674016	Dyak\GE10167	3R	38.5637	0.819107	Dyak\GE10167	3R	39.7276	0.600936	Dere\GG13052	scaffold_4770	42.952	1.48407	Dana\GF16354	scaffold_13340	30.9567	2.05678	Dpse\GA10684	2	22.0397	11.2559	Dper\GL24323	dper_scaffold_0	29.143	4.98646	FBpp0282170-D1_1	Muller-E	25.0208	8.77457	Dwil\GK22539	dwil_scf2_1100000004921	34.1833	8.12512
CG15739	st5	X	FBgn0030347	0.461908	0.530994	Dsim\GD17054	Scf_X	1.11928	1.30013	Dsec\GM13116	scaffold_36	0.199645	0.454259	CG15739-PA	X	0.356255	0.403381	Dyak\GE15672	X	0	0.142199	Dyak\GE15672	X	0	0	Dere\GG18450	scaffold_4690	0.0718403	0	Dana\GF21574	scaffold_12948	0.225338	2.28173	Dpse\GA13927	XL_group1e	12.2122	6.22516	Dper\GL20155	dper_scaffold_17	15.0947	14.0487					Dwil\GK25499	dwil_scf2_1100000004909	2.02088	4.14309
CG15047	st5	X	FBgn0030938	28.6309	0.36034	Dsim\GD24855	Scf_X	47.7036	3.12447	Dsec\GM22904	scaffold_8	39.3714	0.888653	CG15047-PA	X	30.6647	0.300166	Dyak\GE17733	X	63.6217	0.263616	Dyak\GE17733	X	38.076	0.662517	Dere\GG19172	scaffold_4690	37.0292	0.109103	Dana\GF22536	scaffold_13248	28.2668	1.1382	Dpse\GA13458	XL_group3a	21.8579	5.28367	Dper\GL26981	dper_scaffold_39	32.9175	6.86467	FBpp0272246-D1_1	Muller-A	38.6228	7.19327	Dwil\GK16020	dwil_scf2_1100000004963	61.3928	131.27
CG10623	st2	2L	FBgn0032727	0.0319815	2.43914	Dsim\GD21796	Scf_2L	0.0257396	0.790695	Dsec\GM17049	scaffold_7	0.0763105	1.81989	CG10623-PA	2L	0.0413551	1.75931	Dyak\GE12691	2R	0.685038	2.96491	Dyak\GE12691	2R	6.3184	2.2333	Dere\GG21670	scaffold_4845	0.157316	3.00708	Dana\GF14646	scaffold_12916	7.49982	0.551108	Dpse\GA10445	4_group3	62.5131	1.17921	Dper\GL19625	dper_scaffold_1	91.5676	2.14203					Dwil\GK24683	dwil_scf2_1100000004585	16.6686	5.29438
Rhp	st2	X	FBgn0026374	0.136746	4.74327	Dsim\GD17246	Scf_X	0.166343	8.22252	Dsec\GM22583	scaffold_37	0.0319403	7.43871	Rhp-PB	X	0.230498	7.85784	Dyak\GE17224	X	0.977712	48.7251	Dyak\GE17224	X	0.2572	16.3324	Dere\GG17916	scaffold_4690	0.141903	106.385	Dana\GF20187	scaffold_13417	41.811	89.1182	Dpse\GA21119	Unknown_group_527	28.3195	5.68104	Dper\GL24798	dper_scaffold_423	29.6502	17.2342					Dwil\GK10207	dwil_scf2_1100000004909	22.1039	30.0496
CG9919	st2	X	FBgn0030742	0.0355967	2.05542	Dsim\GD15755	Scf_X	0.0437475	2.42107	Dsec\GM13408	scaffold_17	0.0737685	2.46696	CG9919-PA	X	0	0.624279	Dyak\GE15977	X	0	0.845663	Dyak\GE15977	X	0	1.22691	Dere\GG19330	scaffold_4690	0.137666	23.3927	Dana\GF19620	scaffold_13137	3.55369	19.0635	Dpse\GA22123	XL_group1e	4.03789	3.67611	Dper\GL15895	dper_scaffold_22	4.68516	9.81717	FBpp0277761-D1_1	Muller-A	11.7057	8.15578	Dwil\GK10065	dwil_scf2_1100000004909	2.20636	3.29929
DnaJ-H	st5	2L	FBgn0032474	58.5984	1.20809	Dsim\GD22085	Scf_2L	8.50245	0.722233	Dsec\GM25845	scaffold_16	1.32497	3.40984	DnaJ-H-PB	2L	6.67809	0.717346	Dyak\GE11908	2L	8.3523	0.372349	Dyak\GE11908	2L	5.21798	0.201914	Dere\GG10228	scaffold_4929	4.57763	0.483474	Dana\GF15647	scaffold_12916	1.08015	8.71215	Dpse\GA22062	4_group4	0.359371	15.0807	Dper\GL24772	dper_scaffold_46	0.0364463	21.3771	FBpp0287618-D1_1	Muller-B	0.00566313	26.177	Dwil\GK14806	dwil_scf2_1100000004521	40.9005	8.21871
CG15618	st2	X	FBgn0031077	0.785202	5.52546	Dsim\GD15559	Scf_X	0.892449	8.93431	Dsec\GM22702	scaffold_8	0.749039	7.25392					Dyak\GE17350	X	0.353302	1.88598	Dyak\GE17350	X	0.215082	1.1316	Dere\GG18019	scaffold_4690	0.354274	16.6728	Dana\GF20221	scaffold_13417	1.84826	2.29171	Dpse\GA13852	XL_group1e	1.18538	4.33757	Dper\GL13068	dper_scaffold_13	8.38565	0.889462	FBpp0280720-D1_1	Muller-A	1.68404	0.58019	Dwil\GK25461	dwil_scf2_1100000004909	11.3943	30.4356
egl	st5	2R	FBgn0000562	31.5368	0.76707	Dsim\GD25020	Scf_2R	29.2717	0.546538	Dsec\GM15515	scaffold_9	30.5142	0.623681	egl-PB	2R	31.2515	0.229672	Dyak\GE11539	2R	31.7468	0.688859	Dyak\GE11539	2R	27.1212	0.677626	Dere\GG20003	scaffold_4845	25.9375	0.319203	Dana\GF11823	scaffold_13266	49.7874	5.77347	Dpse\GA30496	3	42.3564	1.93485	Dper\GL17589	dper_scaffold_4	51.6558	0.343481					Dwil\GK23167	dwil_scf2_1100000004954	49.2996	30.4834
Vinc	st5	X	FBgn0004397	13.6166	0.680106					Dsec\GM18903	scaffold_10	10.8539	1.06461	Vinc-PA	X	13.1183	0.703059									Dere\GG12636	scaffold_4644	16.621	0.629038	Dana\GF21972	scaffold_12929	9.52239	2.38438	Dpse\GA17230	XL_group1a	13.6911	3.35502	Dper\GL13395	dper_scaffold_26	39.8697	5.89932	FBpp0273151-D1_1	Muller-A	10.4517	7.49634	Dwil\GK16959	dwil_scf2_1100000004963	33.574	1.99735
CG8159	st5	3R	FBgn0037619	8.76187	0.154843	Dsim\GD18570	Scf_3R	7.75584	0.478382	Dsec\GM23759	scaffold_0	9.07956	1.982	CG8159-PB	3R	5.80483	0.388964	Dyak\GE25903	3R	10.0269	0.404788	Dyak\GE25903	3R	10.388	0.124202	Dere\GG12737	scaffold_4770	6.06997	0.123842	Dana\GF18186	scaffold_13340	21.8237	20.1225	Dpse\GA20857	2	11.3729	6.51229	Dper\GL12478	dper_scaffold_6	13.6184	3.35776	FBpp0284777-D1_1	Muller-E	15.4018	5.95961	Dwil\GK11276	dwil_scf2_1100000004902	9.57637	8.40077
CG4562	st5	3R	FBgn0038740	2.92463	1.03707	Dsim\GD20097	Scf_3R	0.999473	0.096403	Dsec\GM26890	scaffold_25	6.67828	3.48822	CG4562-PA	3R	1.26963	0.51022	Dyak\GE25109	3R	3.01532	0.36357	Dyak\GE25109	3R	47.0394	78.5639	Dere\GG15808	scaffold_4770	3.387	0.118528	Dana\GF17354	scaffold_13340	0.240479	1.39034	Dpse\GA18260	2	29.8788	75.9573					FBpp0301677-D1_1	Muller-E	7.03103	356.906	Dwil\GK22360	dwil_scf2_1100000004921	2.39336	11.1312
Rab9	st5	2L	FBgn0032782	4.69126	0.0700142	Dsim\GD24206	Scf_2L	7.59119	0.309047	Dsec\GM17348	scaffold_7	6.15498	0.165667	Rab9-PA	2L	2.90931	0.259574	Dyak\GE13254	2R	7.81614	0.697428	Dyak\GE13254	2R	15.3563	0.109277	Dere\GG21181	scaffold_4845	9.12228	0.311035	Dana\GF14043	scaffold_12916	6.24524	1.51168	Dpse\GA22174	4_group4	30.7071	11.4168	Dper\GL21209	dper_scaffold_16	41.5017	3.95552	FBpp0287298-D1_1	Muller-B	31.1866	2.50214	Dwil\GK18197	dwil_scf2_1100000004577	25.4658	3.92174
tamo	st5	2R	FBgn0041582	16.7446	1.24984					Dsec\GM18268	scaffold_5	23.8316	1.84018	tamo-PA	2R	6.5671	0.207937	Dyak\GE11479	2R	15.2991	2.18572	Dyak\GE11479	2R	13.1167	0.797476	Dere\GG19950	scaffold_4845	17.324	0.266433	Dana\GF13475	scaffold_13266	15.52	2.51319	Dpse\GA17922	3	31.1422	8.53263	Dper\GL10418	dper_scaffold_2	57.2129	20.4273	FBpp0276580-D1_1	Muller-C	47.1523	9.21127	Dwil\GK23198	dwil_scf2_1100000004954	30.6195	19.5347
CG5611	st5	3R	FBgn0039531	9.73372	0.898818	Dsim\GD18069	Scf_3R	9.41882	0.957775					CG5611-PA	3R	28.1693	4.67232	Dyak\GE10552	3R	17.4493	1.96501	Dyak\GE10552	3R	18.8743	7.99598	Dere\GG12104	scaffold_4820	17.6313	0.394897	Dana\GF18700	scaffold_13340	12.5841	4.39795	Dpse\GA19005	2	19.8813	12.0181	Dper\GL13773	dper_scaffold_7	30.0444	14.6497	FBpp0292414-D1_1	Muller-E	14.5548	9.99266	Dwil\GK11326	dwil_scf2_1100000004902	35.4107	1.37685
CG10932	st5	X	FBgn0029969	39.0189	0.568645	Dsim\GD24579	Scf_X	85.315	1.11056	Dsec\GM11967	scaffold_50	275.638	0.913105	CG10932-PA	X	94.2438	4.03999e-24	Dyak\GE17503	X	56.3247	0.47157	Dyak\GE17503	X	49.3641	0.947162	Dere\GG17603	scaffold_4690	37.3935	0.699145	Dana\GF21242	scaffold_13117	60.5991	68.397	Dpse\GA10651	XL_group1e	15.2369	1.91358	Dper\GL14584	dper_scaffold_14	39.4589	2.48686					Dwil\GK10115	dwil_scf2_1100000004909	61.057	6.49983
hoe1	st5	2L	FBgn0041150	57.4261	0.380321	Dsim\GD22681	Scf_2L	50.2341	1.20487	Dsec\GM18063	scaffold_5	76.5788	1.06894	hoe1-PC	2L	65.1749	1.98358	Dyak\GE18721	2L	76.2235	1.43887	Dyak\GE18721	2L	87.2571	5.68912	Dere\GG24342	scaffold_4929	49.9851	0.877651	Dana\GF21545	scaffold_12943	77.077	3.15147	Dpse\GA11811	4_group3	51.1993	7.90219	Dper\GL19493	dper_scaffold_1	48.3532	10.4756	FBpp0280619-D1_1	Muller-B	44.1693	13.9939	Dwil\GK24590	dwil_scf2_1100000004585	40.5198	4.76337
CG33786	st5		FBgn0061361			Dsim\GD25261	Scf_2R	5.9556e-30	6.37779e-68	Dsec\GM19771	scaffold_1	11.291	8.0185	CG33786-PA	2R	3.53227e-10	1.21299e-05	Dyak\GE13782	2R	0.670926	0.316101	Dyak\GE13782	2R	2.24074e-05	2.66758e-05	Dere\GG20842	scaffold_4845	1.15241	2.70089e-30	Dana\GF12752	scaffold_13266	18.809	57.2432	Dpse\GA17233	3	20.2666	66.4872	Dper\GL17434	dper_scaffold_4	38.4267	105.809					Dwil\GK21591	dwil_scf2_1100000004513	2.31872	11.6796
CG34313	st2		FBgn0085342			Dsim\GD24091	Scf_2L	0.556339	0.0742268	Dsec\GM17216	scaffold_7	0.066514	7.43174e-05	CG34313-PA	2L	0.873169	1.02698e-06	Dyak\GE12776	2R	0.424535	1.39118	Dyak\GE12776	2R	0.0153064	1.20025					Dana\GF14776	scaffold_12916	22.5215	9.69339	Dpse\GA24995	4_group3	1.35284	2.19354	Dper\GL14188	dper_scaffold_8	5.58778	10.3583	FBpp0278457-D1_1	Muller-B	5.08949	9.34047	Dwil\GK18241	dwil_scf2_1100000004577	4.59289	6.49868
Transitions obscura_group to per_pse
0 to 1
1 to 0
Transitions mel_subgroup to mel_mau_sec_sim
0 to 1
CG14694	st5	3R	FBgn0037845	2.21247e-69	2.71459	Dsim\GD20697	Scf_3R	5.92976e-06	1.18784	Dsec\GM26144	scaffold_0	15.0395	16.0327	CG14694-PA	3R	0.246385	3.67158	Dyak\GE24661	3R	0	0.551741	Dyak\GE24661	3R	0	0.277749	Dere\GG17260	scaffold_4770	0.02269	0.515048					Dpse\GA13183	2	1.65868e-214	0.104503	Dper\GL12064	dper_scaffold_6	0	0					Dwil\GK13289	dwil_scf2_1100000004943	0	0.00924897
CG31999	st2	4	FBgn0051999	1.42231	11.1915									CG31999-PA	4	3.92803	11.6074	Dyak\GE14522	4	1.70719	3.8404	Dyak\GE14522	4	2.22103	9.42134	Dere\GG16457	scaffold_4512	0.101658	0.574208	Dana\GF23411	scaffold_13034	0	0.152254	Dpse\GA27859	Unknown_group_15	0.0157186	0.0618657	Dper\GL18157	dper_scaffold_42	0.00798748	0.165221	FBpp0285406-D1_1	Muller-F	0.169123	0.178843	Dwil\GK13673	dwil_scf2_1100000004943	0.00702243	0.65432
CG8773	st5	3R	FBgn0038135	0.0225693	1.35067	Dsim\GD18895	Scf_3R	72.6813	10.8288	Dsec\GM24097	scaffold_0	0	1.20823					Dyak\GE26259	3R	0.00272013	0.19755	Dyak\GE26259	3R	0	0.84421	Dere\GG19555	scaffold_4770	0	0.822696	Dana\GF17590	scaffold_13340	0	0.416507	Dpse\GA21310	2	0.00319374	0.140261	Dper\GL24464	dper_scaffold_0	0	0.168968	FBpp0282301-D1_1	Muller-E	0	0.417757	Dwil\GK13934	dwil_scf2_1100000004943	0	0.0632339
CG9961	st5	2L	FBgn0031451	0.353907	4.04558	Dsim\GD22811	Scf_2L	1.47409	2.45908	Dsec\GM18206	scaffold_5	0.0433023	1.34627	CG9961-PA	2L	0.165148	3.81786	Dyak\GE15053	2L	0.0351722	0.0652265	Dyak\GE15053	2L	0.0146871	0.102911	Dere\GG24499	scaffold_4929	0.131366	0.238572	Dana\GF13876	scaffold_12984	0	0.360044	Dpse\GA22152	4_group4	0.0237036	0.0426986	Dper\GL26450	dper_scaffold_10	1.65289	1.0579	FBpp0287542-D1_1	Muller-B	0.712392	1.86695	Dwil\GK24483	dwil_scf2_1100000004585	0.0380486	0.765613
CG31115	st5	3R	FBgn0051115	0.121999	2.82231	Dsim\GD21159	Scf_3R	0.10761	1.95762	Dsec\GM17788	scaffold_33	0.039439	0.648398	CG31115-PB	3R	0.242934	1.01685	Dyak\GE23544	3R	0.295426	0.485098	Dyak\GE23544	3R	0.168396	0.3023	Dere\GG11348	scaffold_4820	0.0702844	0.622496	Dana\GF16421	scaffold_13340	0.0191785	0.336072	Dpse\GA16019	2	0	0.0440576	Dper\GL21888	dper_scaffold_3	0	0.303157	FBpp0281762-D1_1	Muller-E	0	1.38364	Dwil\GK14359	dwil_scf2_1100000004943	0.0175511	0.252617
laccase2	st2	2R	FBgn0259247	9.09095	8.39301	Dsim\GD10372	Scf_3L	0.00811178	0	Dsec\GM22045	scaffold_105	5.33852	4.69055	CG42345-PA	2R	10.396	5.30672	Dyak\GE11369	v2_chr2L_random_028	0.148919	0.0732961	Dyak\GE11369	v2_chr2L_random_028	0.153693	0.0957402	Dere\GG23161	scaffold_4929	0.105263	0.0547513	Dana\GF21502	scaffold_12586	0.0988208	0.176156	Dpse\GA15844	Unknown_group_191	0.113724	0.322029	Dper\GL11050	dper_scaffold_2	0.0327185	1.39383	FBpp0272490-D1_1	Muller-C	0.266212	0.148343	Dwil\GK21370	dwil_scf2_1100000004513	0	0.10906
laccase2	st5	2R	FBgn0259247	9.09095	8.39301	Dsim\GD10372	Scf_3L	0.00811178	0	Dsec\GM22045	scaffold_105	5.33852	4.69055	CG42345-PA	2R	10.396	5.30672	Dyak\GE11369	v2_chr2L_random_028	0.148919	0.0732961	Dyak\GE11369	v2_chr2L_random_028	0.153693	0.0957402	Dere\GG23161	scaffold_4929	0.105263	0.0547513	Dana\GF21502	scaffold_12586	0.0988208	0.176156	Dpse\GA15844	Unknown_group_191	0.113724	0.322029	Dper\GL11050	dper_scaffold_2	0.0327185	1.39383	FBpp0272490-D1_1	Muller-C	0.266212	0.148343	Dwil\GK21370	dwil_scf2_1100000004513	0	0.10906
Adgf-D	st5	3R	FBgn0038172	0	3.22512	Dsim\GD20479	Scf_3R	0	1.73163	Dsec\GM25912	scaffold_0	0	2.31467	Adgf-D-PA	3R	0	6.69685	Dyak\GE24420	3R	0	0.108839	Dyak\GE24420	3R	0	0.22239	Dere\GG17028	scaffold_4770	0	0.147235	Dana\GF18149	scaffold_13340	0	0.147344	Dpse\GA21919	2	1.07655	4.58152	Dper\GL24450	dper_scaffold_0	0.0652886	0.444848					Dwil\GK13065	dwil_scf2_1100000004943	0.00332549	0.0441893
Ir54a	st5	2R	FBgn0034272	0.0173768	1.17552	Dsim\GD11311	Scf_2R	0.0469936	1.0246	Dsec\GM21819	scaffold_1	5.56297e-220	4.32946	Ir54a-PA	2R	0.0237514	0.48875	Dyak\GE11894	2R	0.115128	0.331812	Dyak\GE11894	2R	0.0819897	0.125785	Dere\GG21817	scaffold_4845	0.0222937	0.223671	Dana\GF19777	scaffold_13266	0	0.138902	Dpse\GA13021	3	0	0.0440074	Dper\GL17218	dper_scaffold_4	0	0	FBpp0278574-D1_1	Muller-C	0	0.0316842	Dwil\GK19678	dwil_scf2_1100000004512	0	0.0677031
CG13362	st5	X	FBgn0029531	0.0858719	1.16419	Dsim\GD16462	Scf_X	4.05642	8.30265	Dsec\GM19025	scaffold_10	0.54031	1.05917	CG13362-PA	X	0.36009	0.534843	Dyak\GE16572	X	0.0132063	0.132537	Dyak\GE16572	X	0	0.0453393	Dere\GG12746	scaffold_4644	0.0472095	0.578103					Dpse\GA12231	XL_group1e	0	0.0506654	Dper\GL21397	dper_scaffold_60	0	0.716679	FBpp0285094-D1_1	Muller-A	0	0.0304032	Dwil\GK16175	dwil_scf2_1100000004590	0	0
CG17075	st5	2L	FBgn0031239	0.00345661	3.61434	Dsim\GD22974	Scf_2L	0.111547	1.23409	Dsec\GM16686	scaffold_14	0.0304456	4.30579	CG17075-PA	2L	0.0419098	1.23639	Dyak\GE16316	2L	0	0.423872	Dyak\GE16316	2L	0.00665972	0.758517	Dere\GG24668	scaffold_4929	0	0.422506	Dana\GF22863	scaffold_12943	0	0.390591	Dpse\GA14311	4_group1	2.39305	1.42936	Dper\GL25829	dper_scaffold_5	0.152292	1.58604	FBpp0279468-D1_1	Muller-B	0.122461	0.570309	Dwil\GK21068	dwil_scf2_1100000004851	0.0190524	0.86357
CG2681	st5	X	FBgn0024997	0	2.25164	Dsim\EG:100G10.2	Scf_X	0.0357757	4.59738	Dsec\GM19242	scaffold_10	0.00680441	1.06827	CG2681-PA	X	0.452097	5.82027	Dyak\GE16275	X	0	0.404077	Dyak\GE16275	X	0.0145066	0.358538	Dere\GG18622	scaffold_4690	0.0553691	0.838559	Dana\GF22449	scaffold_13248	0.0146042	0.0938845	Dpse\GA15427	XL_group1e	0.0537597	0.542293	Dper\GL19914	dper_scaffold_18	0.123222	0.183563	FBpp0286472-D1_1	Muller-A	0.0405661	0.23944	Dwil\GK16374	dwil_scf2_1100000004590	0.00604557	0.0633075
CG14949	st5	3L	FBgn0035358	65.9541	176.991	Dsim\GD13381	Scf_3L	14.6463	38.9493	Dsec\GM14113	scaffold_2	0.352969	13.5688	CG14949-PA	3L	0.379566	7.33602	Dyak\GE21697	3L	0	0	Dyak\GE21697	3L	0	0.25299	Dere\GG14507	scaffold_4784	0	0.175239	Dana\GF10246	scaffold_13337	0	0.136567	Dpse\GA13376	XR_group3a	0	0.0163504	Dper\GL22622	dper_scaffold_23	0	0.0456216	FBpp0278128-D1_1	Muller-AD	0	0.0286962	Dwil\GK12502	dwil_scf2_1100000004729	0	0
CG7550	st5	3L	FBgn0035839	10.743	10.8272	Dsim\GD13021	Scf_3L	15.0432	4.63722	Dsec\GM24972	scaffold_0	14.544	14.4707	CG7550-PA	3L	15.4016	8.26698	Dyak\GE20374	3L	2.99919	7.84495e-17	Dyak\GE20374	3L	4.61051	2.50161e-05	Dere\GG14921	scaffold_4784	3.65	2.13606e-158	Dana\GF10483	scaffold_13337	4.75259e-06	1.9431e-08	Dpse\GA20432	XR_group3a	4.03009e-109	1.35465e-201	Dper\GL22483	dper_scaffold_23	12.8111	18.2443					Dwil\GK19978	dwil_scf2_1100000004540	16.9627	2.92739
CG5987	st5	3R	FBgn0039501	0.0641899	10.4926	Dsim\GD15082	Scf_3R	0.00915864	3.32658	Dsec\GM10118	scaffold_13	3.58891	7.91994	CG5987-PA	3R	1.46246	5.35942	Dyak\GE10574	3R	0.00232106	0.344526	Dyak\GE10574	3R	0.00781068	0.0674853	Dere\GG12126	scaffold_4820	0.0410538	1.34915	Dana\GF18720	scaffold_13340	0.0143501	0.548671	Dpse\GA19278	2	0	0.36767	Dper\GL23051	dper_scaffold_0	1.46696	1.61983	FBpp0283664-D1_1	Muller-E	0	0.384649	Dwil\GK22594	dwil_scf2_1100000004921	2.15328	5.8326
CG7985	st5	3R	FBgn0028499	5.5918	3.48758	Dsim\GD19213	Scf_3R	1.03581	1.02714	Dsec\GM15285	scaffold_12	18.9016	3.80677	CG7985-PA	3R	2.76966	1.79103	Dyak\GE25519	3R	1.09579	1.18211	Dyak\GE25519	3R	2.57755	0.788521	Dere\GG22715	scaffold_4770	0.563276	1.1528	Dana\GF18511	scaffold_13340	0.673725	0.608401	Dpse\GA20741	2	0.554347	2.90402	Dper\GL12597	dper_scaffold_6	0.400895	0.637485	FBpp0284895-D1_1	Muller-E	1.31889	0.867613	Dwil\GK11247	dwil_scf2_1100000004902	0.03466	0.0408455
alpha-Est2	st5	3R	FBgn0015570	0.0232576	2.97981	Dsim\GD19941	Scf_3R	0	1.4223	Dsec\GM10966	scaffold_6	11.5139	65.6345	alpha-Est2-PA	3R	200.305	1028.07	Dyak\GE11183	v2_chr3R_random_110	0.0110904	0.173286	Dyak\GE11183	v2_chr3R_random_110	0	0.0441974	Dere\GG14130	scaffold_4770	0.00743747	0.0331721	Dana\GF17678	scaffold_13340	0	0.0657001	Dpse\GA15379	2	6.08226	0.138426	Dper\GL12447	dper_scaffold_6	13.1527	0.0591084	FBpp0284746-D1_1	Muller-E	8.36445	0.279549	Dwil\GK12015	dwil_scf2_1100000004902	0.325115	0.591154
Thor	st2	2L	FBgn0261560	9.73578	20.9588	Dsim\Thor	Scf_2L	8.9067	61.7913	Dsec\GM11143	scaffold_129	7.00976	52.9418	Thor-PA	2L	0.966039	16.6472	Dyak\Thor	2L	0.562038	25.2237	Dyak\Thor	2L	0.133477	1.22575	Dere\GG24948	scaffold_4929	0.423017	5.57454	Dana\GF15239	scaffold_12916	0	21.7823	Dpse\GA21364	4_group3	0	68.1637	Dper\GL18656	dper_scaffold_1	0.802455	326.179	FBpp0279961-D1_1	Muller-B	0.378956	142.668
CG13085	st5	2L	FBgn0032780	1.20921	3.85733	Dsim\GD24204	Scf_2L	0.808121	2.45206	Dsec\GM17345	scaffold_7	1.15102	0	CG13085-PA	2L	0.259618	0	Dyak\GE13252	2R	0	0	Dyak\GE13252	2R	0.882812	0.169356	Dere\GG21179	scaffold_4845	0.0564331	0.498747	Dana\GF19685	scaffold_12916	0.0796434	0.0571697	Dpse\GA12035	4_group4	1.84774	1.23035	Dper\GL21207	dper_scaffold_16	1.45482	0.943674	FBpp0287296-D1_1	Muller-B	3.86337	6.33523	Dwil\GK19080	dwil_scf2_1100000004516	0.15362	0.233064
CG14830	st5	3L	FBgn0035755	0.00532371	2.87174	Dsim\GD13078	Scf_3L	9.86631	9.83282	Dsec\GM13779	scaffold_2	0.442426	2.05344	CG14830-PA	3L	0.171029	2.98965	Dyak\GE20431	3L	0	0.105053	Dyak\GE20431	3L	0	0	Dere\GG14985	scaffold_4784	0.0270994	0.0783852	Dana\GF23864	scaffold_13337	0	0.127497	Dpse\GA13281	XR_group8	0	0.0242115	Dper\GL21193	dper_scaffold_65	0	0	FBpp0286315-D1_1	Muller-AD	0	0.0276433	Dwil\GK16674	dwil_scf2_1100000004511	0.0270695	0.172606
nAChRbeta2	st5	3R	FBgn0004118	0.0160409	12.2052	Dsim\GD18288	Scf_3R	0	6.53174	Dsec\GM23481	scaffold_0	0	10.5621	nAcRbeta-96A-PA	3R	0	14.1207	Dyak\GE10794	3R	0.00848336	0.186822	Dyak\GE10794	3R	0	0.0254784	Dere\GG12341	scaffold_4820	0	0.583407	Dana\GF20710	scaffold_13088	0.0251601	0.058504	Dpse\GA19869	2	0.038323	0.254896	Dper\GL21977	dper_scaffold_3	0.0380627	0.0962968	FBpp0284231-D1_1	Muller-E	0.00337327	0	Dwil\GK22820	dwil_scf2_1100000004921	0	0
CG30156	st5	2R	FBgn0050156	0.142119	1.62355	Dsim\GD10282	Scf_2R	0.0700445	1.28519	Dsec\GM20829	scaffold_1	0.222021	1.70107	CG30156-PA	2R	0.0390827	0.566816	Dyak\GE24291	2L	0.434362	0.528424	Dyak\GE24291	2L	0.0508569	0.810716	Dere\GG10780	scaffold_4929	0.106657	0.949848	Dana\GF11752	scaffold_13266	0.0140044	0.136726	Dpse\GA15683	3	0.449239	0.29715	Dper\GL10957	dper_scaffold_2	0.246255	0.422518	FBpp0277123-D1_1	Muller-C	0.344846	0.811288	Dwil\GK21535	dwil_scf2_1100000004513	0.0376071	93.721
CG17264	st5	2L	FBgn0031490	0.00231839	2.47765	Dsim\GD12004	Scf_2L	0	1.98312	Dsec\GM18386	scaffold_5	0.00803345	3.45802	CG17264-PA	2L	0	4.95943	Dyak\GE18201	2L	0	0.182593	Dyak\GE18201	2L	0	0.110188	Dere\GG24910	scaffold_4929	0	0.5619	Dana\GF15140	scaffold_12916	0.0253903	0.0860627	Dpse\GA14424	4_group3	0.00405759	0.181866	Dper\GL18542	dper_scaffold_1	0.00532611	0.157891	FBpp0279835-D1_1	Muller-B	0.00348759	0.572341	Dwil\GK14961	dwil_scf2_1100000004521	0	0.0598873
CG30099	st5	2R	FBgn0050099	0	8.63584	Dsim\GD25548	Scf_2R	0	6.1409	Dsec\GM20067	scaffold_1	0.0320515	4.3876	CG30099-PA	2R	3.85281e-39	18.0309	Dyak\GE14074	2R	0	0.0351267	Dyak\GE14074	2R	0	0.0700576	Dere\GG22279	scaffold_4845	0	0.53143	Dana\GF19768	scaffold_13266	0	0.169724	Dpse\GA15648	3	0.0145643	0.852431					FBpp0277538-D1_1	Muller-C	0	0.170182
Rcd7	st5	3L	FBgn0260461	1.33287	1.87353	Dsim\GD14811	Scf_3L	1.1692	2.87002	Dsec\GM19590	scaffold_29	0	0.602956	Rcd7-PA	3L	0	1.37894	Dyak\GE23209	v2_chr3L_random_173	0	0.874257	Dyak\GE23209	v2_chr3L_random_173	0	0.470372	Dere\GG16043	scaffold_4784	0	0.537759	Dana\GF10054	scaffold_13337	0	0.430881													Dwil\GK20231	dwil_scf2_1100000004540	0	0.421965
CG34347	st5	3R	FBgn0085376	0.161641	2.27388	Dsim\GD21572	Scf_3R	0.322065	3.84074	Dsec\GM12936	scaffold_4	0.0232786	4.41423	CG34347-PB	3R	0.0226887	1.96739	Dyak\GE10935	3R	0.288818	0.157947	Dyak\GE10935	3R	0.362528	0.040213	Dere\GG11802	scaffold_4820	8.80579	0.590374	Dana\GF17780	scaffold_13340	0	0	Dpse\GA27015	2	0	0.547373	Dper\GL27244	dper_scaffold_19	0.446865	0.0744733	FBpp0283339-D1_1	Muller-E	0	0.272509	Dwil\GK22759	dwil_scf2_1100000004921	0.0172938	0.00377052
1 to 0
Cyp311a1	st5	X	FBgn0030367	0.110708	0.129209	Dsim\GD15944	Scf_X	3.18416	1.06577	Dsec\GM13226	scaffold_53	7.0592	0.813287	Cyp311a1-PB	X	0.814731	0.824286	Dyak\GE16724	X	1.18231	3.11379	Dyak\GE16724	X	4.80755	14.2525	Dere\GG19563	scaffold_4690	0.736041	3.46799	Dana\GF19512	scaffold_13335	0.338742	3.40113	Dpse\GA22770	XL_group1a	0.187677	2.41546	Dper\GL15123	dper_scaffold_28	0.0718026	1.10144	FBpp0272997-D1_1	Muller-A	0.0633322	0.190643	Dwil\GK25740	dwil_scf2_1100000004909	0	0
CG8839	st5	2R	FBgn0033717	21.0479	0.600523	Dsim\GD25848	Scf_2R	26.1777	0.699384	Dsec\GM20367	scaffold_1	23.2914	0.397787	CG8839-PD	2R	32.257	0.809283	Dyak\GE13457	2R	36.93	14.1081	Dyak\GE13457	2R	25.7067	11.2042	Dere\GG22587	scaffold_4845	15.394	22.7262	Dana\GF12071	scaffold_13266	36.9276	19.9889	Dpse\GA21360	3	12.0232	2.93504	Dper\GL11255	dper_scaffold_2	13.6605	3.59857	FBpp0277440-D1_1	Muller-C	26.2773	1.6423	Dwil\GK22129	dwil_scf2_1100000004558	31.4328	46.1742
CG14879	st2	3R	FBgn0038419	0.420314	1.90677	Dsim\GD20298	Scf_3R	0.722542	2.00713	Dsec\GM15443	scaffold_12	0.290626	1.23341	CG14879-PA	3R	4.50625	5.04668	Dyak\GE26322	3R	5.95775	5.3895	Dyak\GE26322	3R	8.41908	14.123	Dere\GG20048	scaffold_4770	17.9847	7.23848	Dana\GF16524	scaffold_13340	37.6832	108.951	Dpse\GA13315	2	0.158091	0.0274169	Dper\GL22248	dper_scaffold_3	0.0109269	0	FBpp0284510-D1_1	Muller-E	0.447512	0.240243	Dwil\GK13510	dwil_scf2_1100000004943	4.10518	1.82147
sprt	st2	2R	FBgn0082585	0.312198	23.5992	Dsim\GD25902	Scf_2R	0.554541	43.156	Dsec\GM20431	scaffold_1	31.3491	43.2739	sprt-PA	2R	0.385606	30.0209	Dyak\GE13523	2R	14.8413	95.1649	Dyak\GE13523	2R	22.9596	109.554	Dere\GG22649	scaffold_4845	15.9209	79.047	Dana\GF12395	scaffold_13266	61.4121	35.3569	Dpse\GA30463	3	0.0678787	7.92915	Dper\GL10396	dper_scaffold_2	3.67541	4.71913	FBpp0307276-D1_1	Muller-C	0.0565429	3.5167	Dwil\GK21885	dwil_scf2_1100000004513	3.81632	37.7532
mxt	st5	2L	FBgn0031637	19.593	3.08902	Dsim\GD22686	Scf_2L	15.6789	1.21659	Dsec\GM18068	scaffold_5	22.4327	2.97026	CG2950-PD	2L	18.274	2.34268	Dyak\GE14664	2L	17.9493	8.20399	Dyak\GE14664	2L	19.3298	18.266	Dere\GG24348	scaffold_4929	12.9994	9.27315	Dana\GF14414	scaffold_12916	34.0221	4.94149	Dpse\GA15540	4_group3	58.4779	11.1418	Dper\GL18748	dper_scaffold_1	59.6647	6.83268	FBpp0280056-D1_1	Muller-B	16.6112	0.820851	Dwil\GK24594	dwil_scf2_1100000004585	45.8274	5.19668
CG3714	st5	2L	FBgn0031589	13.6079	1.33435	Dsim\GD11991	Scf_2L	10.1758	0.709715	Dsec\GM18107	scaffold_5	17.6736	0.586882	CG3714-PC	2L	12.1692	0.966601	Dyak\GE14765	2L	13.7508	4.57434	Dyak\GE14765	2L	15.6242	8.30321	Dere\GG24391	scaffold_4929	18.4728	12.3887	Dana\GF24555	scaffold_12943	11.3304	11.1966	Dpse\GA17636	4_group3	15.8377	14.4832	Dper\GL19290	dper_scaffold_1	25.8241	15.7397	FBpp0280409-D1_1	Muller-B	25.2289	10.6372	Dwil\GK23764	dwil_scf2_1100000004516	9.29834	9.76075
Irp-1B	st5	3R	FBgn0024957	19.904	0.199244	Dsim\GD20721	Scf_3R	38.2506	0.3793	Dsec\GM26170	scaffold_0	60.4288	0.690178	Irp-1B-PA	3R	35.3174	1.7392	Dyak\GE24686	3R	45.1081	3.01224	Dyak\GE24686	3R	51.3562	1.35679	Dere\GG17286	scaffold_4770	43.6874	1.24795	Dana\GF17523	scaffold_13340	30.9759	18.242	Dpse\GA19525	2	17.084	15.3783	Dper\GL23831	dper_scaffold_0	29.5327	13.1767
CG3246	st5	2L	FBgn0031538	0	0.166221	Dsim\GD22756	Scf_2L	0	9.48815e-10					CG3246-PA	2L	0	0.898747	Dyak\GE14872	2L	0.25568	6.40594	Dyak\GE14872	2L	0.581983	8.9328	Dere\GG24439	scaffold_4929	0.409043	6.4655	Dana\GF23414	scaffold_12943	0.0475308	1.54141	Dpse\GA16920	4_group3	0.0539647	2.75325	Dper\GL18895	dper_scaffold_1	2.05531	11.6782	FBpp0280214-D1_1	Muller-B	0.0350768	0.875404	Dwil\GK23861	dwil_scf2_1100000004516	0.025767	0.113894
nvy	st5	2R	FBgn0005636	0.00288909	0.595738	Dsim\GD11849	Scf_2R	0	0.353565	Dsec\GM11850	scaffold_23	0	0.245037	nvy-PA	2R	0	0.136202	Dyak\GE14394	2R	0	2.39908	Dyak\GE14394	2R	0	3.68249	Dere\GG22957	scaffold_4845	0	3.08115	Dana\GF11389	scaffold_13266	0	3.34679	Dpse\GA24088	3	0.00914085	5.54895	Dper\GL20013	dper_scaffold_34	0.00492893	19.2056	FBpp0275790-D1_1	Muller-C	0.0132994	7.51507	Dwil\GK22201	dwil_scf2_1100000004558	0.00130721	0.684127
CG15093	st5	2R	FBgn0034390	42.1854	0.131525	Dsim\GD25359	Scf_2R	41.0277	0.672387	Dsec\GM19876	scaffold_1	55.9966	1.13573	CG15093-PB	2R	515.079	20.7605	Dyak\GE13884	2R	44.788	11.2685	Dyak\GE13884	2R	39.2239	4.97838	Dere\GG20945	scaffold_4845	36.8258	2.35889	Dana\GF13754	scaffold_13266	17.8677	26.99	Dpse\GA13484	3	65.669	110.664	Dper\GL11305	dper_scaffold_2	99.3007	254.446	FBpp0277488-D1_1	Muller-C	45.457	174.764	Dwil\GK12956	dwil_scf2_1100000004943	64.177	1.57513
stv	st2	3L	FBgn0086708	0.0304348	0.048993	Dsim\GD14453	Scf_3L	0.0284764	0.0244806	Dsec\GM25424	scaffold_0	0.0402623	0.108663	stv-PE	3L	0.0103027	0.0705851	Dyak\GE21975	3L	10.4672	2.16215	Dyak\GE21975	3L	15.94	9.71073	Dere\GG15647	scaffold_4784	8.15127	1.17029	Dana\GF23468	scaffold_13337	17.3825	6.04581	Dpse\GA28307	XR_group8	0.224891	1.08444	Dper\GL20748	dper_scaffold_29	3.39025	5.65492	FBpp0286267-D1_1	Muller-AD	2.93904	13.2336	Dwil\GK17074	dwil_scf2_1100000004511	0.0182758	0.00616078
CG7386	st5	3L	FBgn0035691	0.847569	0.099928	Dsim\GD13947	Scf_3L	3.73417	0.074374	Dsec\GM14770	scaffold_2	21.8757	0.276047	CG7386-PA	3L	4.25765	0.100188	Dyak\GE21551	3L	14.7284	26.9475	Dyak\GE21551	3L	19.585	9.96919	Dere\GG15333	scaffold_4784	15.346	28.3881	Dana\GF23532	scaffold_13337	12.1654	11.5467	Dpse\GA20315	XR_group3a	13.475	2.16695					FBpp0277564-D1_1	Muller-AD	12.4588	0.963215	Dwil\GK16929	dwil_scf2_1100000004511	9.78484	3.52259
CG5567	st5	3L	FBgn0036760	5.49218	0.411711	Dsim\GD12368	Scf_3L	28.8869	5.78897e-07	Dsec\GM24299	scaffold_0	40.468	1.75795	CG5567-PA	3L	44.512	7.67977e-05	Dyak\GE22109	3L	36.7969	1.86384	Dyak\GE22109	3L	36.2979	5.67105	Dere\GG15774	scaffold_4784	29.6202	14.1986	Dana\GF25232	scaffold_13337	0.208098	2.65276	Dpse\GA18976	XR_group6	38.0447	10.1177	Dper\GL22743	dper_scaffold_20	53.5252	15.8372	FBpp0274122-D1_1	Muller-AD	63.6852	25.1461	Dwil\GK21181	dwil_scf2_1100000004540	3.75967	4.13125e-05
Gclc	st5	X	FBgn0040319	21.5069	0.277374	Dsim\GD16129	Scf_X	20.7221	0.70647	Dsec\GM11211	scaffold_44	28.8373	2.93115	Gclc-PA	X	17.9212	0.42613	Dyak\GE17482	X	13.9951	7.09076	Dyak\GE17482	X	21.8214	7.47218	Dere\GG17988	scaffold_4690	30.1516	5.34357	Dana\GF19496	scaffold_13335	14.2417	2.42706	Dpse\GA15329	XL_group1e	10.3721	3.92455	Dper\GL20203	dper_scaffold_17	10.6912	0.587231	FBpp0282813-D1_1	Muller-A	17.0809	4.18308	Dwil\GK25641	dwil_scf2_1100000004909	19.5957	5.55281
Transitions mel_subgroup to ere_yak_san
0 to 1
CG13713	st2	3L	FBgn0042199	0.0438222	24.7956	Dsim\GD13859	Scf_3L	0	20.6264	Dsec\GM14677	scaffold_2	0	28.7232	CG13713-PA	3L	5.20888	70.5802	Dyak\GE21466	3L	3.82716	69.2169	Dyak\GE21466	3L	6.09939	104.437	Dere\GG15244	scaffold_4784	5.61639	65.3765	Dana\GF25088	scaffold_13337	0.0812037	145.125	Dpse\GA12478	XR_group8	0.144886	50.2144	Dper\GL17913	dper_scaffold_24	0.586488	229.006	FBpp0286814-D2_1	Muller-AD	0	38.9025	Dwil\GK16597	dwil_scf2_1100000004511	0	71.1614
CG11655	st5	X	FBgn0030638	7.45934	0.392323	Dsim\GD17211	Scf_X	12.9048	0.143903	Dsec\GM19565	scaffold_73	7.76408	0.787809	CG11655-PA	X	5.40795	0	Dyak\GE17185	X	13.1389	1.49817	Dyak\GE17185	X	12.0809	1.2001	Dere\GG17879	scaffold_4690	11.4748	3.1411	Dana\GF21239	scaffold_13117	5.27669	0.0630038	Dpse\GA11122	XL_group1e	13.9811	0.299946					FBpp0275782-D1_1	Muller-A	17.7898	0.71317	Dwil\GK19860	dwil_scf2_1100000004515	10.2476	0.343226
CG42326	st5	2R	FBgn0259226	0.0285323	0.0167013	Dsim\GD10156	Scf_2R	0	0.0151745	Dsec\GM20679	scaffold_1	0.0221158	0.116006					Dyak\GE22930	2L	0.00413149	10.6044	Dyak\GE22930	2L	0.0100844	17.7904	Dere\GG10634	scaffold_4929	0	2.75667	Dana\GF12577	scaffold_13266	0.0533443	0.0404214	Dpse\GA13220	3	0.00873125	0.103407	Dper\GL11022	dper_scaffold_2	0.00901825	0.453277	FBpp0277195-D1_1	Muller-C	0.00160312	0.355659	Dwil\GK23214	dwil_scf2_1100000004954	0.259025	0.126647
Rbp4	st2	3R	FBgn0010258	0.0474632	0.712475	Dsim\GD20485	Scf_3R	0.04484	1.12464	Dsec\GM25919	scaffold_0	0.0558189	0.428721	Rbp4-PA	3R	0	0.128537	Dyak\GE24427	3R	2.47898	17.8483	Dyak\GE24427	3R	3.04749	13.5599	Dere\GG17034	scaffold_4770	12.3423	94.6218	Dana\GF17369	scaffold_13340	0.922455	7.10848	Dpse\GA26466	2	0.369707	0.806883	Dper\GL23972	dper_scaffold_0	1.2718	11.4291	FBpp0281838-D1_1	Muller-E	0.179622	17.8029	Dwil\GK13335	dwil_scf2_1100000004943	0.335402	3.2937
CG13148	st2	2R	FBgn0033767	0.142854	1.31116	Dsim\GD10912	Scf_2R	0	0.364446	Dsec\GM21417	scaffold_1	0.0606535	13.0023	CG13148-PB	2R	0.0364913	2.1963	Dyak\GE12488	2R	4.41727	0.542584	Dyak\GE12488	2R	1.63311	0.420036	Dere\GG20329	scaffold_4845	6.31729	1.04249	Dana\GF11807	scaffold_13266	0.244014	1.87467	Dpse\GA12078	3	0	0.41363	Dper\GL16734	dper_scaffold_4	0	0.106542	FBpp0276303-D1_1	Muller-C	0	1.44045	Dwil\GK21612	dwil_scf2_1100000004513	1.79744	3.20826
CG30339	st5	2R	FBgn0050339	0.00678427	0.161835	Dsim\GD10061	Scf_2R	0.138491	0.373858	Dsec\GM20589	scaffold_1	0	0.0281498	CG30339-PA	2R	0	0.457063	Dyak\GE22159	2L	0.507764	2.22131	Dyak\GE22159	2L	0.96777	2.71487	Dere\GG25272	scaffold_4929	0.0444508	1.86316	Dana\GF12490	scaffold_13266	0	0.567818	Dpse\GA15770	3	4.93317e-302	0.0710257	Dper\GL17331	dper_scaffold_4	0	0.112559	FBpp0276124-D2_1	Muller-C	0.0201139	0.0890548	Dwil\GK15623	dwil_scf2_1100000004514	0	0.163813
CG9413	st5	X	FBgn0030574	0.0111617	0.124799	Dsim\GD15847	Scf_X	0.00897101	0.0595773	Dsec\GM17545	scaffold_20	0	0	CG9413-PB	X	0	0	Dyak\GE16110	X	4.15462	8.48656	Dyak\GE16110	X	0.771524	7.91167	Dere\GG19454	scaffold_4690	0.56223	1.51808	Dana\GF22383	scaffold_13248	0.0103381	0.164869	Dpse\GA21769	XL_group1e	0.0121284	0.0514993	Dper\GL20417	dper_scaffold_17	0.00868544	0.0635319	FBpp0288248-D1_1	Muller-A	0.722981	0.0613234	Dwil\GK18491	dwil_scf2_1100000004963	0	0.105487
CG10339	st5	2R	FBgn0034972	0	0.122129					Dsec\GM18274	scaffold_5	0	0.643955	CG10339-PA	2R	0.0430466	0.72222	Dyak\GE11486	2R	0.991811	6.45274	Dyak\GE11486	2R	0.0767165	2.58015	Dere\GG19954	scaffold_4845	0.840622	5.84572	Dana\GF13480	scaffold_13266	0	0.0198291	Dpse\GA10254	3	0.00409795	0.196552	Dper\GL10423	dper_scaffold_2	0	0.183032	FBpp0276584-D1_1	Muller-C	0	0.0678315	Dwil\GK21390	dwil_scf2_1100000004513	0.0027192	0.0179621
CG34124	st2	2L	FBgn0083960	0.0118915	1.03466	Dsim\GD23311	Scf_2L	0.0734056	2.28303	Dsec\GM18507	scaffold_5	3.62169	7.81678	CG34124-PA	2L	0.271904	2.46284	Dyak\GE11270	2L	3.87066	11.8116	Dyak\GE11270	2L	12.3919	37.1834	Dere\GG25033	scaffold_4929	20.296	80.274	Dana\GF23613	scaffold_12943	0.0935945	1.1639	Dpse\GA16369	4_group4	0.264585	1.47187	Dper\GL26534	dper_scaffold_10	0.227497	1.13761	FBpp0287734-D1_1	Muller-B	0.49006	0.816381	Dwil\GK24476	dwil_scf2_1100000004585	0.403166	0.244883
elav	st2	X	FBgn0260400	0.0496404	53.1516	Dsim\GD16475	Scf_X	0.622769	11.0735	Dsec\GM19036	scaffold_10	0.73772	16.4823					Dyak\GE16581	X	1.48539	25.3242	Dyak\GE16581	X	3.27304	19.3146	Dere\GG12756	scaffold_4644	1.54238	28.7891	Dana\GF22224	scaffold_12929	0.0480529	30.8577	Dpse\GA18065	XL_group1e	0.0478053	43.1669	Dper\GL20165	dper_scaffold_17	0.306904	58.9742					Dwil\GK16120	dwil_scf2_1100000004590	0.0239449	35.1887
sinah	st5	3L	FBgn0259794	0.0048191	0.0302942	Dsim\GD14672	Scf_3L	0.0200427	0.862019	Dsec\GM25665	scaffold_0	0.0422964	0.427462	sinah-PC	3L	0	0.244416	Dyak\GE19882	3L	0.0138428	1.40404	Dyak\GE19882	3L	0	6.82715	Dere\GG13585	scaffold_4784	0	2.42187	Dana\GF23937	scaffold_13337	0.0162792	0.170768	Dpse\GA11985	XR_group8	0	0.166899	Dper\GL20853	dper_scaffold_29	0.00350054	0.139519	FBpp0286933-D1_1	Muller-AD	0	0.18457	Dwil\GK20883	dwil_scf2_1100000004540	0.00838987	0.102118
1 to 0
CG9917	st5	X	FBgn0030740	107.187	1.55319	Dsim\GD15756	Scf_X	123.137	1.24059	Dsec\GM13409	scaffold_17	108.913	2.9925	CG9917-PA	X	100.48	1.19636	Dyak\GE15978	X	68.1306	0.141967	Dyak\GE15978	X	69.6434	0.86849	Dere\GG19331	scaffold_4690	54.5701	0.77196	Dana\GF19082	scaffold_13137	73.3451	193.67	Dpse\GA22121	XL_group1e	66.2918	4.93318	Dper\GL21344	dper_scaffold_69	67.5935	2.76056	FBpp0273640-D1_1	Muller-A	68.6777	4.48457	Dwil\GK10066	dwil_scf2_1100000004909	45.6265	8.10141
tefu	st5	3R	FBgn0045035	7.67802	3.92607	Dsim\GD20371	Scf_3R	7.20253	1.13151	Dsec\GM25794	scaffold_0	10.1493	1.34891	tefu-PB	3R	5.8454	2.5983	Dyak\GE26399	3R	8.81399	1.36155	Dyak\GE26399	3R	5.97699	0.988109	Dere\GG20781	scaffold_4770	4.97703	0.729822	Dana\GF11791	scaffold_13250	9.28724	1.59804	Dpse\GA19668	2	10.5871	30.8464	Dper\GL12075	dper_scaffold_6	13.7058	18.3377					Dwil\GK12780	dwil_scf2_1100000004943	10.7809	3.51931
Spec2	st2	3R	FBgn0044823	33.9192	30.4816	Dsim\GD19599	Scf_3R	58.6859	49.9929	Dsec\GM10611	scaffold_6	64.4074	35.5143	Spec2-PA	3R	0	0	Dyak\GE24155	3R	0	1.38621e-30	Dyak\GE24155	3R	2.01345e-22	5.81578	Dere\GG10922	scaffold_4770	1.8541e-39	2.6519e-138	Dana\GF18659	scaffold_13340	36.4359	170.598	Dpse\GA13165	2	48.8525	70.4994	Dper\GL23024	dper_scaffold_0	8.33164	5.5705	FBpp0300220-D1_1	Muller-E	0	0	Dwil\GK18946	dwil_scf2_1100000004943	34.1438	61.8583
CG33493	st5	3L	FBgn0053493	0.204712	11.2587	Dsim\GD12854	Scf_3L	0.108901	2.79832	Dsec\GM24802	scaffold_0	0.203227	4.62015	CG33493-PA	3L	0	2.63488e-208	Dyak\GE20263	3L	3.38091e-81	1.24515e-32	Dyak\GE20263	3L	0	2.54218e-75	Dere\GG13965	scaffold_4784	0	1.95322e-53	Dana\GF23823	scaffold_13337	0	6.13543	Dpse\GA28304	XR_group8	0	4.28361	Dper\GL20741	dper_scaffold_29	0	3.21121					Dwil\GK16794	dwil_scf2_1100000004511	0.0784148	1.06595
Dot	st5	2L	FBgn0015663	1.77783	2.79503	Dsim\GD23245	Scf_2L	0.849371	0.420713	Dsec\GM18424	scaffold_5	1.55091	2.90185	Dot-PA	2L	0.497288	1.65231	Dyak\GE18247	2L	0.27845	0.856577	Dyak\GE18247	2L	0.273463	0.112977	Dere\GG24955	scaffold_4929	0	0.329536	Dana\GF15245	scaffold_12916	1.33327	1.9621	Dpse\GA15461	4_group3	0.804408	13.4791	Dper\GL18664	dper_scaffold_1	1.00365	8.88822	FBpp0279969-D1_1	Muller-B	1.7844	8.76113
ChLD3	st5	2L	FBgn0032598	0.0640132	10.8984	Dsim\GD24077	Scf_2L	2.04541	3.70204	Dsec\GM17200	scaffold_7	0.0459676	0.853477	ChLD3-PA	2L	21.1588	15.9564	Dyak\GE12760	2R	0.0176411	0.438544	Dyak\GE12760	2R	0.0414593	0.319265	Dere\GG22766	scaffold_4845	0	0.748074	Dana\GF15357	scaffold_12916	0.24228	3.89256	Dpse\GA14716	4_group3	0.0277402	0.961433	Dper\GL18781	dper_scaffold_1	0.116341	1.72974	FBpp0280092-D1_1	Muller-B	95.5982	36.6045	Dwil\GK18229	dwil_scf2_1100000004577	0.0327078	0.0359214
modSP	st5	3R	FBgn0051217	0.122389	3.06949	Dsim\GD20271	Scf_3R	0.0133205	4.86724	Dsec\GM15412	scaffold_12	0	4.89114	modSP-PA	3R	0	1.03579	Dyak\GE26132	3R	0	0.0527014	Dyak\GE26132	3R	0.00986357	0	Dere\GG16813	scaffold_4770	0.30016	0.0865604	Dana\GF17925	scaffold_13340	2.54924	10.0538	Dpse\GA16100	2	3.29312	40.8415	Dper\GL23006	dper_scaffold_0	2.49215	24.7071	FBpp0281798-D1_1	Muller-E	0.893097	5.99804	Dwil\GK13437	dwil_scf2_1100000004943	0.00777098	0.550769
Tsp26A	st2	2L	FBgn0031760	1.08207	7.61753	Dsim\GD23377	Scf_2L	1.81907	29.0033	Dsec\GM18589	scaffold_5	3.77993	6.28658	Tsp26A-PB	2L	1.13383	7.79221	Dyak\GE25811	2L	1.56348	8.38775	Dyak\GE25811	2L	1.01181	6.02127	Dere\GG25112	scaffold_4929	0.00932426	2.03447	Dana\GF15597	scaffold_12916	15.1951	15.4557	Dpse\GA21537	4_group1	1.95908	21.4816	Dper\GL19049	dper_scaffold_1	5.66264	20.8532	FBpp0279176-D1_1	Muller-B	8.01008	32.6889	Dwil\GK14713	dwil_scf2_1100000004521	2.47557	1.41826
Transitions mel_mau_sec_sim to mau_sec_sim
0 to 1
CG6053	st5	3L	FBgn0036195	0	3.88076e-14	Dsim\GD12783	Scf_3L	9.31679	54.2877	Dsec\GM24721	scaffold_0	0.0878748	2.2385	CG6053-PB	3L	0.0104117	1.039	Dyak\GE20187	3L	0.472105	1.22943	Dyak\GE20187	3L	0	0.699186	Dere\GG13896	scaffold_4784	0	0.934982	Dana\GF24523	scaffold_13337	0	0	Dpse\GA19324	XR_group6	0.192476	1.64311	Dper\GL16341	dper_scaffold_61	0	0.608362	FBpp0275398-D1_1	Muller-AD	0	0.500185	Dwil\GK10479	dwil_scf2_1100000004762	1.63614e-24	0.026408
CG4836	st5	3R	FBgn0038762	0.00457591	0.708743	Dsim\GD19331	Scf_3R	0.0221548	3.91045	Dsec\GM17688	scaffold_58	0.014607	6.09695					Dyak\GE25640	3R	0.00325847	0.391063	Dyak\GE25640	3R	0	0.702401	Dere\GG23658	scaffold_4770	0	0.321279	Dana\GF17631	scaffold_13340	0.00932237	0.0384409	Dpse\GA26187	2	0	0.263959	Dper\GL12081	dper_scaffold_6	7.35389e-17	0.330242	FBpp0301816-D1_1	Muller-E	0	0.0349943	Dwil\GK22367	dwil_scf2_1100000004921	0.024786	0.0305191
CG9317	st2	2L	FBgn0032879	0.0111105	1.37944	Dsim\GD21684	Scf_2L	3.82803	5.32087	Dsec\GM23312	scaffold_18	5.90373	5.52609	CG9317-PA	2L	14.3524	14.7417	Dyak\GE13547	2R	4.9847	9.26015	Dyak\GE13547	2R	0	2.40332	Dere\GG21553	scaffold_4845	0.039238	3.73564	Dana\GF14551	scaffold_12916	0.0159237	2.26215	Dpse\GA21695	4_group3	16.2688	19.9265					FBpp0280726-D1_1	Muller-B	0.00424852	8.7566	Dwil\GK15053	dwil_scf2_1100000004521	0.00251267	0.271512
qsm	st2	2R	FBgn0028622	0.931856	1.26349	Dsim\GD25268	Scf_2R	1.28957	0.754798	Dsec\GM19777	scaffold_1	1.71841	1.79623	l(2)05510-PA	2R	1.16679	1.07725	Dyak\GE13788	2R	2.41123	1.94814	Dyak\GE13788	2R	3.10571	1.60154	Dere\GG20849	scaffold_4845	1.30487	5.02736	Dana\GF12759	scaffold_13266	9.38906	4.75081	Dpse\GA12284	3	0.141583	1.8779	Dper\GL17441	dper_scaffold_4	0.427032	1.72917	FBpp0277949-D1_1	Muller-C	2.07723	1.77161	Dwil\GK21832	dwil_scf2_1100000004513	0.265558	0.266471
CG10089	st5	3L	FBgn0036369	0.186503	0.508802	Dsim\GD12655	Scf_3L	1.68555	6.58306	Dsec\GM24587	scaffold_0	0.382416	4.85478	CG10089-PD	3L	27.3724	46.542	Dyak\GE20058	3L	16.1541	13.1288	Dyak\GE20058	3L	2.44088	1.05772	Dere\GG13761	scaffold_4784	3.52388	0.435344	Dana\GF10970	scaffold_13337	0.100714	0	Dpse\GA10063	XR_group8	0.00472686	0.103334	Dper\GL20790	dper_scaffold_29	0.0907652	1.70625					Dwil\GK17106	dwil_scf2_1100000004511	0	0.092255
yuri	st2	2L	FBgn0045842	0.822835	6.41136	Dsim\GD21966	Scf_2L	3.64965	1.15743	Dsec\GM14489	scaffold_3	3.40816	3.1933	yuri-PL	2L	16.1764	4.53838	Dyak\GE19411	2L	0.283891	3.81414	Dyak\GE19411	2L	0.475203	2.36712	Dere\GG24217	scaffold_4929	0.292313	9.46109	Dana\GF14532	scaffold_12916	0.0291285	0.0469504	Dpse\GA16430	4_group4	0.416209	1.14905	Dper\GL26602	dper_scaffold_10	0.136124	1.3185	FBpp0287800-D1_1	Muller-B	1.67857	5.07021	Dwil\GK18260	dwil_scf2_1100000004577	0.00385363	0.369018
NaCP60E	st5	2R	FBgn0085434	0.472727	1.24396	Dsim\GD11909	Scf_2R	0.325652	6.78529	Dsec\GM11913	scaffold_23	1.00873	7.46408	NaCP60E-PD	2R	2.20582	6.38952	Dyak\GE14454	2R	0.776378	3.65561	Dyak\GE14454	2R	0.220713	0.125365	Dere\GG23017	scaffold_4845	1.09523	1.41535	Dana\GF13350	scaffold_13266	0.0224025	0.0735343	Dpse\GA24638	3	916.98	3096.49	Dper\GL11199	dper_scaffold_2	0	0.0382292					Dwil\GK20910	dwil_scf2_1100000004510	0.395771	0.82028
CG17739	st5	2R	FBgn0033710	0.0174273	0.131463	Dsim\GD10852	Scf_2R	0.0157517	1.30073	Dsec\GM21355	scaffold_1	4.12443	7.2494	CG17739-PA	2R	0.480989	1.40894	Dyak\GE12428	2R	0.048876	0.158382	Dyak\GE12428	2R	0.0763192	0.161674	Dere\GG20270	scaffold_4845	0.0785292	0.171525	Dana\GF12839	scaffold_13266	0.162163	0.805792	Dpse\GA24501	3	0.0177924	0.122376	Dper\GL10818	dper_scaffold_2	0.03755	0.318872	FBpp0276988-D1_1	Muller-C	0.0179824	0.0739628	Dwil\GK21893	dwil_scf2_1100000004513	0	0.0385861
CG42399	st2	2L	FBgn0259818	0.895544	6.39464	Dsim\GD22984	Scf_2L	1.6037	5.94315	Dsec\GM16695	scaffold_14	1.73946	7.39874	CG42399-PB	2L	3.24278	11.1036	Dyak\GE16405	2L	0.689655	14.9139	Dyak\GE16405	2L	0.617177	13.8867	Dere\GG24677	scaffold_4929	0.343886	29.1579	Dana\GF15042	scaffold_12916	0.00451887	0.19885	Dpse\GA18328	4_group2	0.00324827	0.277161	Dper\GL16505	dper_scaffold_8	0.00381067	0.767946	FBpp0285191-D1_1	Muller-B	0.00364132	2.16011	Dwil\GK24451	dwil_scf2_1100000004585	0.0204025	0.156212
CG14659	st5	3R	FBgn0037284	0	0.0325226	Dsim\GD19648	Scf_3R	0.209858	2.72941	Dsec\GM10673	scaffold_6	0.0835669	3.25873	CG14659-PA	3R	0.398785	13.6499	Dyak\GE25324	3R	0	0.24631	Dyak\GE25324	3R	0	1.07579	Dere\GG11300	scaffold_4770	0	0.215792	Dana\GF19866	scaffold_13340	0	0.27332	Dpse\GA13154	2	0	0.633447	Dper\GL21620	dper_scaffold_3	0	0.55104	FBpp0281510-D1_1	Muller-E	0	1.48328	Dwil\GK18970	dwil_scf2_1100000004943	0	0.127472
CG11168	st2	3R	FBgn0039249	1.57112	1.80449	Dsim\GD21146	Scf_3R	3.65406	3.71176	Dsec\GM17770	scaffold_33	1.96099	2.87549	CG11168-PA	3R	3.66268	4.12676	Dyak\GE23531	3R	1.92689	0.318922	Dyak\GE23531	3R	0.957082	0.12205	Dere\GG11336	scaffold_4820	0.54199	0.721409	Dana\GF16312	scaffold_13340	0.387432	0.511891	Dpse\GA10812	2	1.39339	2.49864	Dper\GL24400	dper_scaffold_0	2.90378	2.26152	FBpp0282242-D1_1	Muller-E	4.7003	3.33278	Dwil\GK12974	dwil_scf2_1100000004943	0.195971	5.92288
Ir93a	st5	3R	FBgn0259215	1.12873e-73	0.433555	Dsim\GD20027	Scf_3R	0.33722	1.1524	Dsec\GM23153	scaffold_27	0.655072	4.87564	Ir93a-PA	3R	4.05378e-306	1.02355	Dyak\GE25033	3R	0	0.232439	Dyak\GE25033	3R	0	3.11667	Dere\GG15081	scaffold_4770	1.4597	1.58209	Dana\GF17010	scaffold_13340	0	0.0981227	Dpse\GA30143	2	0.0525107	1.01494	Dper\GL23256	dper_scaffold_0	0.00201035	4.10705	FBpp0300209-D1_1	Muller-E	0.0202151	4.92552e-11	Dwil\GK22692	dwil_scf2_1100000004921	0	0.0185971
Dad	st2	3R	FBgn0020493	0.415768	0.762251	Dsim\GD19135	Scf_3R	3.04735	0.89119	Dsec\GM15202	scaffold_12	2.5552	0.820833	Dad-PA	3R	3.59508	2.8009	Dyak\GE24606	3R	0.0333527	2.78796	Dyak\GE24606	3R	0	2.23425	Dere\GG21962	scaffold_4770	0.0136802	2.80795	Dana\GF17083	scaffold_13340	0.115986	8.57185	Dpse\GA18732	2	0.363079	3.76227	Dper\GL21924	dper_scaffold_3	0.435321	3.14554	FBpp0284200-D1_1	Muller-E	1.52781	5.02367	Dwil\GK13383	dwil_scf2_1100000004943	10.1149	13.6613
CG14569	st5	3L	FBgn0037123	0.0134702	0.935556	Dsim\GD12092	Scf_3L	0	3.20576	Dsec\GM22115	scaffold_11	0	6.59472	CG14569-PA	3L	0	2.26703									Dere\GG13206	scaffold_4784	0	0.787589	Dana\GF24640	scaffold_13337	0	0.399069	Dpse\GA13088	XR_group6	0	0.173573	Dper\GL25275	dper_scaffold_9	0.00721668	3.41622	FBpp0275094-D1_1	Muller-AD	0	1.13822	Dwil\GK17126	dwil_scf2_1100000004511	0.0309247	2.44383
CG18135	st5	3L	FBgn0036837	28.7918	0.475988	Dsim\GD12312	Scf_3L	22.0063	4.13614	Dsec\GM14904	scaffold_19	26.2179	1.80151					Dyak\GE22533	3L	20.3529	1.90085	Dyak\GE22533	3L	26.2786	0.146637	Dere\GG13436	scaffold_4784	33.2377	0.652102	Dana\GF10791	scaffold_13337	9.59818	0.1058	Dpse\GA14809	XR_group8	3.22479	0.0229971	Dper\GL21983	dper_scaffold_36	3.48143	0.388769					Dwil\GK12569	dwil_scf2_1100000004762	2.66785	0.619039
CG17549	st5	2L	FBgn0032774	0	0.657128	Dsim\GD21765	Scf_2L	0.0284187	6.026	Dsec\GM17015	scaffold_7	0	15.354	CG17549-PA	2L	0	1.05456	Dyak\GE12656	2R	0	1.2388	Dyak\GE12656	2R	0	0.988209	Dere\GG21637	scaffold_4845	0	1.03881	Dana\GF15198	scaffold_12916	0.32553	0.970202	Dpse\GA14551	4_group4	0	0.220292	Dper\GL21111	dper_scaffold_16	0	0.699052	FBpp0288005-D1_1	Muller-B	0	0.227267	Dwil\GK23840	dwil_scf2_1100000004516	0	77.434
Rab26	st5	3L	FBgn0086913	0.00403994	0.0384218	Dsim\GD14951	Scf_3L	0.0451113	9.60598	Dsec\GM22359	scaffold_11	0	20.7891	Rab26-PC	3L	0	3.11598									Dere\GG16176	scaffold_4784	0.0257341	0.65382	Dana\GF10277	scaffold_13337	0	0	Dpse\GA23949	XR_group6	0.0088247	0.016888	Dper\GL24681	dper_scaffold_33	0	0.014306	FBpp0275561-D1_1	Muller-AD	0	0.0379517	Dwil\GK20471	dwil_scf2_1100000004768	0.00983618	3.39113
robls54B	st2	2R	FBgn0263233	0.0877084	2.10933	Dsim\GD25477	Scf_2R	2.50137	6.6831					CG34192-PA	2R	1.36273	5.03636	Dyak\GE14190	2R	0	5.49379	Dyak\GE14190	2R	0	0.923301	Dere\GG22195	scaffold_4845	0	1.60717	Dana\GF19782	scaffold_13266	0	4.13464	Dpse\GA24438	3	0.458696	0.709133	Dper\GL10663	dper_scaffold_2	0.0499131	0					Dwil\GK19223	dwil_scf2_1100000004954	0	0.619309
dtr	st2	2L	FBgn0023090	0.0898182	0.221516	Dsim\GD24320	Scf_2L	2.5084	2.48878	Dsec\GM23411	scaffold_18	3.6131	2.38852	dtr-PA	2L	1.38313	1.36873	Dyak\GE12915	2R	0.00426664	0.0108699	Dyak\GE12915	2R	0	0.41159	Dere\GG21300	scaffold_4845	0.00322535	0.212165	Dana\GF14329	scaffold_12916	0	0	Dpse\GA16341	4_group4	0.62991	7.76125	Dper\GL26663	dper_scaffold_10	1.37312	21.3023	FBpp0287855-D1_1	Muller-B	0.0396157	5.22172	Dwil\GK18740	dwil_scf2_1100000004884	0.00500941	0.0500594
CG13196	st5	2R	FBgn0033645	0	0.264255	Dsim\GD25890	Scf_2R	0.00935551	1.64867	Dsec\GM20414	scaffold_1	0.00818407	3.5361	CG13196-PA	2R	0	2.06074	Dyak\GE13507	2R	0	0.0702471	Dyak\GE13507	2R	0	0.541259	Dere\GG22635	scaffold_4845	0	0.24419	Dana\GF13410	scaffold_13266	0	0.41056	Dpse\GA12111	3	11.5174	12.7066	Dper\GL10255	dper_scaffold_31	0	0.734753	FBpp0275939-D1_1	Muller-C	0	0.0127243	Dwil\GK17924	dwil_scf2_1100000004822	0	0.0954752
yellow-c	st2	2L	FBgn0041713	0.006806	0.0385801	Dsim\GD23989	Scf_2L	2.16745	21.9153	Dsec\GM15882	scaffold_3	1.41049	16.8183	yellow-c-PA	2L	3.77146	19.7463	Dyak\GE20803	2L	0.00809522	1.96864	Dyak\GE20803	2L	0.255408	5.54091	Dere\GG25141	scaffold_4929	0.528539	6.34079	Dana\GF14904	scaffold_12916	1.60917	1.95784	Dpse\GA18010	4_group1	0.230654	4.59339	Dper\GL26025	dper_scaffold_5	0.146183	6.65487	FBpp0279009-D1_1	Muller-B	0.85692	17.7641	Dwil\GK18310	dwil_scf2_1100000004577	0.0329103	7.0387
CG12826	st5	2R	FBgn0033207	0	0.119028	Dsim\GD15303	Scf_2R	0.00797974	1.68545	Dsec\GM20770	scaffold_1	0	2.58291	CG12826-PA	2R	0	0	Dyak\GE23739	2L	0	6.33659e-06	Dyak\GE23739	2L	0	0.139145	Dere\GG10723	scaffold_4929	0	5.07273e-07	Dana\GF11702	scaffold_13266	0	0.666571	Dpse\GA11837	3	0	0.542214	Dper\GL11540	dper_scaffold_2	0	0.268031	FBpp0277743-D1_1	Muller-C	0	0.177224	Dwil\GK19669	dwil_scf2_1100000004512	0.0660736	1.23813
cwo	st5	3R	FBgn0259938	8.75446	0.424713	Dsim\GD18691	Scf_3R	8.3088	1.74715	Dsec\GM23880	scaffold_0	10.8815	2.23613					Dyak\GE26033	3R	8.4425	1.7051	Dyak\GE26033	3R	5.96422	0.313409	Dere\GG17540	scaffold_4770	4.78885	0.918573	Dana\GF17529	scaffold_13340	0.338722	0.0174773	Dpse\GA14324	2	0.0855915	0.254548	Dper\GL23696	dper_scaffold_0	4.83018	0.682588	FBpp0282490-D1_1	Muller-E	0.011373	0.0834318	Dwil\GK11546	dwil_scf2_1100000004902	21.699	0.527692
scaf	st5	2R	FBgn0033033	0.16179	0.684139	Dsim\GD10353	Scf_2R	2.19282	9.77062	Dsec\GM16503	scaffold_26	0.013743	3.7502	scaf-PB	2R	0.138384	5.6841	Dyak\GE19444	2L	0.822391	1.7847	Dyak\GE19444	2L	0.343639	2.40618	Dere\GG10851	scaffold_4929	0	0.255025	Dana\GF11026	scaffold_13266	0.00772482	0.063293	Dpse\GA10737	3	0	0.0545929	Dper\GL11062	dper_scaffold_2	0.00613107	0.139889	FBpp0277236-D1_1	Muller-C	0.0037972	0.112019	Dwil\GK10763	dwil_scf2_1100000004382	0	0.136105
CG31805	st2	2L	FBgn0051805	0.00805843	0.0468684	Dsim\GD21887	Scf_2L	1.32135	2.33871	Dsec\GM17147	scaffold_7	5.797	5.93842	CG31805-PC	2L	16.2804	19.2744	Dyak\GE13152	2R	0	0.0589648	Dyak\GE13152	2R	0.0614054	0.172122	Dere\GG21762	scaffold_4845	0.00595805	0.0161381	Dana\GF15115	scaffold_12916	0	0.019173	Dpse\GA26114	4_group3	0.00705378	0.0415171	Dper\GL16052	dper_scaffold_8	0.0106151	0.15143	FBpp0280947-D1_1	Muller-B	0.0118842	0.0287137	Dwil\GK23879	dwil_scf2_1100000004516	0	0
CG31805	st5	2L	FBgn0051805	0.00805843	0.0468684	Dsim\GD21887	Scf_2L	1.32135	2.33871	Dsec\GM17147	scaffold_7	5.797	5.93842	CG31805-PC	2L	16.2804	19.2744	Dyak\GE13152	2R	0	0.0589648	Dyak\GE13152	2R	0.0614054	0.172122	Dere\GG21762	scaffold_4845	0.00595805	0.0161381	Dana\GF15115	scaffold_12916	0	0.019173	Dpse\GA26114	4_group3	0.00705378	0.0415171	Dper\GL16052	dper_scaffold_8	0.0106151	0.15143	FBpp0280947-D1_1	Muller-B	0.0118842	0.0287137	Dwil\GK23879	dwil_scf2_1100000004516	0	0
FucTC	st2	X	FBgn0044872	0.147287	1.26706	Dsim\GD24709	Scf_X	5.01395	13.4241	Dsec\GM10051	scaffold_39	38.735	55.2091					Dyak\GE15255	X	1.11545	0.800279	Dyak\GE15255	X	0.166083	1.8994	Dere\GG17499	scaffold_4690	0	4.28373	Dana\GF22153	scaffold_12929	0.0863637	0.0284024	Dpse\GA23084	XL_group1a	2.60943e-07	0.00746942	Dper\GL16534	dper_scaffold_15	1.67037	4.74656	FBpp0273635-D1_1	Muller-A	0.249158	3.95503	Dwil\GK20026	dwil_scf2_1100000004515	0	2.0821
CG9864	st5	2R	FBgn0034490	0.0197311	0.318105	Dsim\GD25294	Scf_2R	0.0176767	1.00419					CG9864-PA	2R	0.098996	9.35579	Dyak\GE13817	2R	0	0.0913032	Dyak\GE13817	2R	0.0573939	0.101864	Dere\GG20877	scaffold_4845	0.00947521	0.306975	Dana\GF13156	scaffold_13266	0	3.20389	Dpse\GA22082	3	0.00747589	0.104619	Dper\GL17576	dper_scaffold_4	0	0.106853	FBpp0277991-D2_1	Muller-B	3.0779	283.355	Dwil\GK15678	dwil_scf2_1100000004514	0.00609325	0
1 to 0
blow	st5	2R	FBgn0004133	0.191398	2.22967	Dsim\GD10237	Scf_2R	1.29715	0.327494	Dsec\GM20776	scaffold_1	0.0365469	0.125789	blow-PA	2R	0.0557355	0.141697	Dyak\GE23805	2L	0.0404607	0.970107	Dyak\GE23805	2L	0.172577	1.15313	Dere\GG10729	scaffold_4929	0.0195656	1.37611	Dana\GF11709	scaffold_13266	1.6202	4.41876	Dpse\GA12421	3	1.70079	1.98812	Dper\GL20103	dper_scaffold_44	0.250261	3.33324					Dwil\GK10711	dwil_scf2_1100000004382	0.308496	0.95998
mesh	st5	3R	FBgn0051004	0	3.3245	Dsim\GD16568	Scf_3R	0	0.747247	Dsec\GM12101	scaffold_4	0	0.635211	CG31004-PD	3R	0	0.592599	Dyak\GE23331	3R	0	1.88059	Dyak\GE23331	3R	0	8.55911	Dere\GG11883	scaffold_4820	0	1.31714	Dana\GF16595	scaffold_13340	0	0.429164	Dpse\GA15929	2	0.447936	5.0238	Dper\GL13953	dper_scaffold_7	0.159809	13.7128	FBpp0293040-D1_1	Muller-E	0.019919	3.79897	Dwil\GK22555	dwil_scf2_1100000004921	0.0116708	0.99949
qsm	st5	2R	FBgn0028622	0.931856	1.26349	Dsim\GD25268	Scf_2R	1.28957	0.754798	Dsec\GM19777	scaffold_1	1.71841	1.79623	l(2)05510-PA	2R	1.16679	1.07725	Dyak\GE13788	2R	2.41123	1.94814	Dyak\GE13788	2R	3.10571	1.60154	Dere\GG20849	scaffold_4845	1.30487	5.02736	Dana\GF12759	scaffold_13266	9.38906	4.75081	Dpse\GA12284	3	0.141583	1.8779	Dper\GL17441	dper_scaffold_4	0.427032	1.72917	FBpp0277949-D1_1	Muller-C	2.07723	1.77161	Dwil\GK21832	dwil_scf2_1100000004513	0.265558	0.266471
CG13716	st5	3L	FBgn0035563	0.0400169	5.17784	Dsim\GD13243	Scf_3L	0	0.0563223	Dsec\GM13961	scaffold_2	0	0.716728	CG13716-PA	3L	0.0742311	0.866569	Dyak\GE20598	3L	0.0377335	28.1863	Dyak\GE20598	3L	0	40.5788	Dere\GG14170	scaffold_4784	0.728164	19.9285	Dana\GF24722	scaffold_13337	0	15.0838	Dpse\GA12480	XR_group8	0	0.849673	Dper\GL17938	dper_scaffold_24	0.0862917	3.16472					Dwil\GK17602	dwil_scf2_1100000004511	0	2.38719
papi	st5	2L	FBgn0031401	13.7022	3.10727	Dsim\GD23138	Scf_2L	14.6183	0.745213	Dsec\GM18322	scaffold_5	16.4472	0.704826	CG7082-PA	2L	54.5621	0.265911	Dyak\GE18040	2L	21.1833	1.09553e-32	Dyak\GE18040	2L	22.7743	9.43964	Dere\GG24838	scaffold_4929	34.5174	6.8297	Dana\GF14610	scaffold_12916	17.9664	3.83817	Dpse\GA20088	4_group3	7.61887	20.732	Dper\GL18709	dper_scaffold_1	13.367	21.078	FBpp0280012-D1_1	Muller-B	8.32842	17.6371	Dwil\GK15145	dwil_scf2_1100000004521	10.3015	13.444
CG3769	st5	2L	FBgn0032119	2.7368e-15	1.80259	Dsim\GD23605	Scf_2L	7.91118e-32	5.19198e-09	Dsec\GM17453	scaffold_3	6.6275e-39	2.19599e-17	CG3769-PA	2L	0	0.51028	Dyak\GE18841	2L	6.14703e-192	7.36211e-26	Dyak\GE18841	2L	0.0888065	3.01954	Dere\GG25350	scaffold_4929	0.0499399	1.09149	Dana\GF22735	scaffold_12943	0.0139445	1.09063	Dpse\GA17674	4_group1	0.0271435	1.36952	Dper\GL26151	dper_scaffold_5	0	2.16884e-256					Dwil\GK24206	dwil_scf2_1100000004585	0	0.0598514
CG30338	st2	2R	FBgn0050338	1.43785	2.34974	Dsim\GD10669	Scf_2R	0.763583	0.576025	Dsec\GM21140	scaffold_1	1.0173	1.44385	CG30338-PA	2R	0.843913	0.879537	Dyak\GE19292	2L	1.88992	1.2703	Dyak\GE19292	2L	2.17063	1.43339	Dere\GG24092	scaffold_4929	2.07069	3.488	Dana\GF12482	scaffold_13266	3.46379	9.07121	Dpse\GA15769	3	3.11891e-34	2.73425e-09	Dper\GL17149	dper_scaffold_4	3.71932	5.00018					Dwil\GK15950	dwil_scf2_1100000004514	2.71248	1.47494
CG30338	st5	2R	FBgn0050338	1.43785	2.34974	Dsim\GD10669	Scf_2R	0.763583	0.576025	Dsec\GM21140	scaffold_1	1.0173	1.44385	CG30338-PA	2R	0.843913	0.879537	Dyak\GE19292	2L	1.88992	1.2703	Dyak\GE19292	2L	2.17063	1.43339	Dere\GG24092	scaffold_4929	2.07069	3.488	Dana\GF12482	scaffold_13266	3.46379	9.07121	Dpse\GA15769	3	3.11891e-34	2.73425e-09	Dper\GL17149	dper_scaffold_4	3.71932	5.00018					Dwil\GK15950	dwil_scf2_1100000004514	2.71248	1.47494
CG14441	st5	X	FBgn0029895	2.93021	3.25278	Dsim\GD16813	Scf_X	3.93318	1.66885	Dsec\GM12521	scaffold_4	9.64701	1.13837					Dyak\GE16768	X	3.71617	3.3473	Dyak\GE16768	X	2.3935	5.35675	Dere\GG19607	scaffold_4690	1.52883	3.49076	Dana\GF21426	scaffold_13117	17.6956	0.719997	Dpse\GA12989	XL_group1a	19.6604	2.28034	Dper\GL13350	dper_scaffold_26	57.5129	9.29448	FBpp0273193-D1_1	Muller-A	17.8756	3.58037	Dwil\GK10118	dwil_scf2_1100000004909	12.718	5.59243
CG5026	st5	3L	FBgn0035945	48.8727	50.3758	Dsim\GD14143	Scf_3L	46.1082	0.819566	Dsec\GM25107	scaffold_0	58.7022	0.558933	CG5026-PA	3L	63.2305	0.836375	Dyak\GE20794	3L	55.8771	39.8151	Dyak\GE20794	3L	59.6761	16.1474	Dere\GG14362	scaffold_4784	46.1904	8.22879	Dana\GF24368	scaffold_13337	32.1001	17.5117	Dpse\GA18604	XR_group5	28.7088	6.27653	Dper\GL15069	dper_scaffold_67	32.152	7.48221	FBpp0288263-D1_1	Muller-AD	29.8943	19.8059	Dwil\GK12345	dwil_scf2_1100000004830	30.9935	0.752474
bnl	st5	3R	FBgn0014135	0	2.07349	Dsim\GD20101	Scf_3R	0.059609	0.198451	Dsec\GM26894	scaffold_25	0	0.982079					Dyak\GE25113	3R	0.00361504	2.28478	Dyak\GE25113	3R	0.0212716	2.80897	Dere\GG15841	scaffold_4770	0	5.73503	Dana\GF17357	scaffold_13340	0	1.21225	Dpse\GA18297	2	0.0085546	0.220261	Dper\GL11947	dper_scaffold_6	0.0208536	4.65745	FBpp0280995-D1_1	Muller-E	0.0322752	1.3158	Dwil\GK22814	dwil_scf2_1100000004921	0.0118415	0.296962
mus81	st5	X	FBgn0040347	40.2624	1.20757	Dsim\GD16537	Scf_X	16.4449	0.444245	Dsec\GM19103	scaffold_10	65.4712	1.48712	mus81-PA	X	21.6358	0.385251	Dyak\GE16651	X	33.4316	4.89387	Dyak\GE16651	X	53.6553	7.02964	Dere\GG12821	scaffold_4644	33.5894	1.4276	Dana\GF22118	scaffold_12929	6.69854	1.42846	Dpse\GA15732	XL_group3a	5.40304	4.68011	Dper\GL14215	dper_scaffold_11	6.73591	9.73742	FBpp0272381-D1_1	Muller-AD	8.37264	4.02638	Dwil\GK24972	dwil_scf2_1100000004909	20.3059	1.00796
pio	st5	2R	FBgn0020521	0.0118619	4.64084	Dsim\GD11878	Scf_2R	0.0171769	1.05346	Dsec\GM11880	scaffold_23	0	0.543684	pio-PB	2R	0	0.563808	Dyak\GE14423	2R	0.475865	9.8112	Dyak\GE14423	2R	0	2.79821	Dere\GG22986	scaffold_4845	0	3.88154	Dana\GF13633	scaffold_13266	0	0.839598	Dpse\GA24126	3	0.190498	0.281812	Dper\GL10225	dper_scaffold_31	6.69762	2.19886	FBpp0275906-D1_1	Muller-C	33.689	33.9059	Dwil\GK19473	dwil_scf2_1100000004512	0.107893	2.10474
CG2006	st5	3R	FBgn0039664	1.36048	1.75569	Dsim\GD21437	Scf_3R	0.444643	0.703176	Dsec\GM12787	scaffold_4	0.678532	0.662934	CG2006-PA	3R	0.421618	0.314668	Dyak\GE23852	3R	0.405657	1.84107	Dyak\GE23852	3R	0.338128	0.41827	Dere\GG11664	scaffold_4820	1.14974	1.04381	Dana\GF23343	scaffold_12911	9.02937	19.1744	Dpse\GA26960	2	8.33131	13.9082	Dper\GL13890	dper_scaffold_7	15.3862	13.4404	FBpp0283188-D1_1	Muller-E	10.2381	5.59162	Dwil\GK11897	dwil_scf2_1100000004902	17.4233	5.86891
CG3529	st5	3L	FBgn0035995	8.89723	1.96151	Dsim\GD14183	Scf_3L	9.7653	0.99162	Dsec\GM25149	scaffold_0	12.1957	1.08445					Dyak\GE20841	3L	11.423	4.38448	Dyak\GE20841	3L	11.9014	8.21179	Dere\GG15377	scaffold_4784	15.01	5.37519	Dana\GF25134	scaffold_13337	16.9259	27.5029	Dpse\GA17503	XR_group8	28.705	9.21384	Dper\GL17879	dper_scaffold_24	54.3409	85.4408	FBpp0286778-D1_1	Muller-AD	30.2536	8.30811	Dwil\GK17578	dwil_scf2_1100000004511	19.8757	0.75957
CG3626	st5	X	FBgn0029706	11.0774	1.14525	Dsim\GD16688	Scf_X	14.7286	0.814328	Dsec\GM12342	scaffold_4	18.8997	0.334914	CG3626-PA	X	17.8817	1.03807	Dyak\GE16342	X	17.7026	4.94477	Dyak\GE16342	X	20.548	1.58864	Dere\GG18704	scaffold_4690	13.1607	2.39718	Dana\GF19457	scaffold_13335	8.50339	7.30804	Dpse\GA17569	XL_group1a	4.51837	7.33638					FBpp0272952-D1_1	Muller-AD	5.69703	3.90717	Dwil\GK15723	dwil_scf2_1100000004963	7.87416	6.19712
pan	st2	4	FBgn0085432	3.3774	120.129	Dsim\pan	Scf_4	1.76539	81.3188	Dsec\GM23239	scaffold_52	0.707493	95.9535	pan-PJ	4	1.1833	62.0764	Dyak\GE14535	4	7.90241	97.3821	Dyak\GE14535	4	3.45291	71.5906	Dere\GG16376	scaffold_4512	3.87617	58.7281	Dana\GF19332	scaffold_13335	4.02041	81.582	Dpse\GA14746	Unknown_group_24	29.196	201.871	Dper\GL18397	dper_scaffold_51	22.6769	233.726	FBpp0275643-D1_1	Muller-F	28.9695	108.987	Dwil\GK13619	dwil_scf2_1100000004943	0.210761	163.422
Cht2	st2	3L	FBgn0022702	26.2225	0.419602	Dsim\GD13442	Scf_3L	0.0269005	1.6728	Dsec\GM14173	scaffold_2	0.539132	0.850137	Cht2-PA	3L	0.0302057	1.61283	Dyak\GE20919	3L	32.0006	1.7849	Dyak\GE20919	3L	18.1656	1.0089	Dere\GG14565	scaffold_4784	21.6838	13.4873	Dana\GF24966	scaffold_13337	0.148351	0.224551	Dpse\GA15211	XR_group8	15.1991	0.812186	Dper\GL20797	dper_scaffold_29	14.6589	9.18852	FBpp0286881-D1_1	Muller-AD	16.2394	0.894719	Dwil\GK17559	dwil_scf2_1100000004511	0.0297206	0.360591
CG13890	st5	3L	FBgn0035169	51.351	5.99544	Dsim\GD13579	Scf_3L	43.172	0.248056	Dsec\GM14360	scaffold_2	75.7909	0.208194	CG13890-PA	3L	57.6939	0.666404	Dyak\GE21104	3L	46.3327	2.52121	Dyak\GE21104	3L	55.316	1.17002	Dere\GG14742	scaffold_4784	48.476	1.71007	Dana\GF24414	scaffold_13337	47.068	0.58692					Dper\GL16867	dper_scaffold_82	22.0199	1.87708					Dwil\GK17361	dwil_scf2_1100000004511	8.90103	4.60202
CG12811	st5	3R	FBgn0037779	23.6139	7.93029	Dsim\GD20740	Scf_3R	17.1094	0.0319274	Dsec\GM26191	scaffold_0	16.1993	0.287651	CG12811-PA	3R	24.068	0.737337	Dyak\GE24710	3R	45.1471	56.9412	Dyak\GE24710	3R	52.9553	38.7078	Dere\GG17307	scaffold_4770	110.924	36.7558	Dana\GF17138	scaffold_13340	41.818	1.14005	Dpse\GA11824	2	14.9824	5.44292	Dper\GL27282	dper_scaffold_19	27.1131	6.66913	FBpp0283377-D1_1	Muller-E	31.6934	42.7764	Dwil\GK22663	dwil_scf2_1100000004921	33.9832	116.479
pst	st5	3L	FBgn0035770	28.9433	7.14353	Dsim\GD13064	Scf_3L	0.671896	0.44515	Dsec\GM13767	scaffold_2	0.420668	0.278845	pst-PF	3L	2.65869	0.713346	Dyak\pst	3L	5.10178	8.14213	Dyak\pst	3L	1.75894	7.55759	Dere\GG14972	scaffold_4784	9.80253	9.32515					Dpse\GA21184	XR_group6	8.58866	33.4063	Dper\GL24331	dper_scaffold_12	12.3082	43.404	FBpp0274721-D1_1	Muller-AD	21.281	119.044	Dwil\GK25321	dwil_scf2_1100000004762	6.63994	18.7225
Transitions mau_sec_sim to mau_sec
0 to 1
Pask	st5	2R	FBgn0034950	0.00306451	0.914398	Dsim\GD11820	Scf_2R	0.00444193	0.615215	Dsec\GM16079	scaffold_9	0.0166362	6.25638	Pask-PA	2R	0	1.04993	Dyak\GE14356	2R	0	0.317916	Dyak\GE14356	2R	0.00527121	0.288176	Dere\GG22919	scaffold_4845	0.0490479	5.89556	Dana\GF12888	scaffold_13266	0	0.101788	Dpse\GA15966	3	0	1.83915	Dper\GL11648	dper_scaffold_2	0.00166102	0.478544	FBpp0277859-D1_1	Muller-C	0	0.166855	Dwil\GK10638	dwil_scf2_1100000004382	0	0
CG6356	st5	3R	FBgn0039178	0	0.0583121	Dsim\GD21085	Scf_3R	0.00567954	0.253266	Dsec\GM26583	scaffold_0	0	1.34133	CG6356-PA	3R	0	14.3541	Dyak\GE23467	3R	0.005714	0	Dyak\GE23467	3R	0	0	Dere\GG11274	scaffold_4820	0	0.0560353	Dana\GF16122	scaffold_13340	0.0114727	0	Dpse\GA19535	2	4.40209	0.861036	Dper\GL23364	dper_scaffold_0	6.70857	0.533503	FBpp0283968-D1_1	Muller-E	3.58899	0.382979	Dwil\GK11739	dwil_scf2_1100000004902	27.2797	8.58351
Cyp4d2	st2	X	FBgn0011576	0.611327	14.3794	Dsim\Cyp4d2	Scf_X	0.153444	16.1562	Dsec\GM19204	scaffold_10	2.72251	7.05375	Cyp4d2-PA	X	3.12176	11.2322	Dyak\Cyp4d2	X	0.147988	4.4327	Dyak\Cyp4d2	X	0.302683	1.55534	Dere\GG12913	scaffold_4644	0.499675	16.5768	Dana\GF22196	scaffold_12929	2.72658	2.32081	Dpse\GA22859	XL_group1a	0.242777	6.63947	Dper\GL13322	dper_scaffold_26	2.06909	9.69499	FBpp0273165-D1_1	Muller-A	0.0257338	2.58957	Dwil\GK16039	dwil_scf2_1100000004963	2.27708	5.08337
Smyd4	st5	3L	FBgn0036282	0.00879864	0.50399	Dsim\GD12724	Scf_3L	0.0104821	0.465368	Dsec\GM24661	scaffold_0	0.180611	1.87114	Smyd4-PA	3L	0	2.42293	Dyak\GE20125	3L	0.0228515	0.0861712	Dyak\GE20125	3L	0.214943	1.08164	Dere\GG13835	scaffold_4784	3.56182e-138	0	Dana\GF24983	scaffold_13337	0.195128	0.615762	Dpse\GA12774	XR_group6	0	0.475897	Dper\GL24960	dper_scaffold_9	0.0168726	0.0816868	FBpp0274586-D1_1	Muller-AD	0	0.0598217	Dwil\GK20590	dwil_scf2_1100000004540	0.0223296	0.0239706
CG6765	st5	3L	FBgn0035903	0.0207751	0.531561	Dsim\GD14098	Scf_3L	0.0669115	0.530469	Dsec\GM25059	scaffold_0	0.0969335	2.17939	CG6765-PA	3L	0.0663975	1.29245	Dyak\GE20746	3L	0.0325369	0.370472	Dyak\GE20746	3L	0.27192	0.130607	Dere\GG14317	scaffold_4784	3.10795	31.5199	Dana\GF24328	scaffold_13337	0.024478	0.292949	Dpse\GA23843	XR_group6	0.080217	2.42492	Dper\GL15502	dper_scaffold_35	37.2769	159.432					Dwil\GK20353	dwil_scf2_1100000004768	3.75629	2.75421
Ady43A	st5	2R	FBgn0026602	3.40054	0.367373	Dsim\GD10267	Scf_2R	2.84771	0.319277	Dsec\GM20810	scaffold_1	6.75073	4.13392	Ady43A-PA	2R	0.162588	1.45722	Dyak\GE24147	2L	17.8377	0.524164	Dyak\GE24147	2L	7.87114	1.16898	Dere\GG10762	scaffold_4929	3.53527	0	Dana\GF12238	scaffold_13266	2.91799	0.0720231	Dpse\GA14968	3	2.62979	0.0230071	Dper\GL10944	dper_scaffold_2	7.74186	0.222526	FBpp0277110-D1_1	Muller-C	0.465641	0.0907925	Dwil\GK21524	dwil_scf2_1100000004513	3.23769	0.0530468
CG8086	st5	2L	FBgn0032010	0.00946741	1.1989	Dsim\GD22425	Scf_2L	0.0195999	2.25557	Dsec\GM13111	scaffold_3	0.00308396	1.73299	CG8086-PE	2L	0.0077117	2.3747	Dyak\GE11082	2L	0.00201097	1.68803	Dyak\GE11082	2L	0	0.564659	Dere\GG23461	scaffold_4929	0	0.294426	Dana\GF15269	scaffold_12916	0	0	Dpse\GA20813	4_group3	0.00362203	0.348919	Dper\GL19389	dper_scaffold_1	0.00166098	1.04565	FBpp0280510-D1_1	Muller-B	0	0.556744	Dwil\GK23857	dwil_scf2_1100000004516	0.0353288	0.0625046
mtg	st5	3R	FBgn0260386	0.141035	1.84076	Dsim\GD18525	Scf_3R	0	0.431434	Dsec\GM23712	scaffold_0	0.173613	2.36843	mtg-PD	3R	0.0466297	1.78032	Dyak\GE25858	3R	0.0079097	2.82449	Dyak\GE25858	3R	0.038737	0.87453	Dere\GG24032	scaffold_4770	0.12204	0.723608	Dana\GF22990	scaffold_12911	0.00863852	0	Dpse\GA20431	2	0	0.016453	Dper\GL23358	dper_scaffold_0	0.0202634	0.241892	FBpp0300238-D1_1	Muller-E	0	0.0116833	Dwil\GK13177	dwil_scf2_1100000004943	0	0.0279729
CG18472	st5	3R	FBgn0039463	0	0.0406922	Dsim\GD21316	Scf_3R	0	0.0327772	Dsec\GM10353	scaffold_13	0.771056	22.8727	CG18472-PA	3R	0.977531	7.55894	Dyak\GE23702	3R	0	0	Dyak\GE23702	3R	0	0	Dere\GG11514	scaffold_4820	0	0.0791975	Dana\GF16464	scaffold_13340	0	0.0615015	Dpse\GA14948	2	0	0.00599759	Dper\GL27232	dper_scaffold_19	0	0.0160871	FBpp0282682-D1_1	Muller-E	0	0.0467932	Dwil\GK11656	dwil_scf2_1100000004902	0.0990722	1.03863
CG14490	st2	2R	FBgn0034281	0	0.234288	Dsim\GD11326	Scf_2R	2.79796e-174	0.0526519	Dsec\GM21832	scaffold_1	2.87553	2.96339	CG14490-PA	2R	3.66592	2.66969	Dyak\GE11909	2R	5.17675e-39	7.36661e-35	Dyak\GE11909	2R	4.99407e-27	3.79191e-15	Dere\GG21832	scaffold_4845	5.16932e-14	1.57694e-206	Dana\GF11683	scaffold_13266	0	0.502514	Dpse\GA13025	3	0	2.8064e-187	Dper\GL17232	dper_scaffold_4	0	0	FBpp0278589-D1_1	Muller-C	7.71047	13.5369	Dwil\GK22235	dwil_scf2_1100000004558	2.43444	1.87297
CG14490	st5	2R	FBgn0034281	0	0.234288	Dsim\GD11326	Scf_2R	2.79796e-174	0.0526519	Dsec\GM21832	scaffold_1	2.87553	2.96339	CG14490-PA	2R	3.66592	2.66969	Dyak\GE11909	2R	5.17675e-39	7.36661e-35	Dyak\GE11909	2R	4.99407e-27	3.79191e-15	Dere\GG21832	scaffold_4845	5.16932e-14	1.57694e-206	Dana\GF11683	scaffold_13266	0	0.502514	Dpse\GA13025	3	0	2.8064e-187	Dper\GL17232	dper_scaffold_4	0	0	FBpp0278589-D1_1	Muller-C	7.71047	13.5369	Dwil\GK22235	dwil_scf2_1100000004558	2.43444	1.87297
CG17658	st5	2R	FBgn0034924	9.26279	0.67991	Dsim\GD11807	Scf_2R	5.78485	0.620469	Dsec\GM16060	scaffold_9	9.24319	2.088	CG17658-PA	2R	8.96456	2.65764	Dyak\GE14337	2R	16.0107	2.50842	Dyak\GE14337	2R	13.8655	0.740257	Dere\GG22899	scaffold_4845	11.3613	0.432486	Dana\GF12872	scaffold_13266	19.6338	3.87273	Dpse\GA14600	3	1.13995	6.08201	Dper\GL11175	dper_scaffold_2	4.55069	3.16851	FBpp0277356-D1_1	Muller-C	5.24381	5.72301	Dwil\GK10282	dwil_scf2_1100000004401	21.2364	1.39414
dimm	st5	2L	FBgn0023091	0	0.00878396	Dsim\GD24318	Scf_2L	0	0.0306298	Dsec\GM23409	scaffold_18	0	2.48888	dimm-PA	2L	0	1.27084	Dyak\GE12913	2R	0	0.392628	Dyak\GE12913	2R	0	0.265347	Dere\GG21298	scaffold_4845	0	0.257938	Dana\GF14327	scaffold_12916	0	0	Dpse\GA21247	4_group4	0.00688559	0.0888921	Dper\GL26661	dper_scaffold_10	0	0.25476	FBpp0287853-D1_1	Muller-B	0	0.017119	Dwil\GK18738	dwil_scf2_1100000004884	0	0
CG9372	st5	3L	FBgn0036891	0	0.474491	Dsim\GD14817	Scf_3L	0.250254	0.570056	Dsec\GM19611	scaffold_29	0.817432	3.90325	CG9372-PA	3L	0.802287	2.29858									Dere\GG16048	scaffold_4784	0.234422	0.470985	Dana\GF23711	scaffold_13337	0.0569556	0.416505	Dpse\GA21737	XR_group8	0.0304791	0.26007	Dper\GL20947	dper_scaffold_48	0	3.00058e-273	FBpp0287067-D1_1	Muller-AD	1.34503	4.73955	Dwil\GK19259	dwil_scf2_1100000004540	0.00332552	0.189382
CG2061	st5	X	FBgn0027498	15.4749	0.490297	Dsim\GD17006	Scf_X	19.9979	1.14248	Dsec\GM11454	scaffold_15	21.2944	2.49441	CG2061-PA	X	18.4495	3.69687	Dyak\GE15905	X	16.2487	1.93257	Dyak\GE15905	X	10.3123	0.481368	Dere\GG18389	scaffold_4690	2.9084	0.908185	Dana\GF20291	scaffold_13417	20.4816	1.19542	Dpse\GA15215	XL_group1e	30.6056	8.92546	Dper\GL18257	dper_scaffold_30	56.8312	15.5315					Dwil\GK25614	dwil_scf2_1100000004909	37.8465	10.7262
CG9512	st5	X	FBgn0030593	0.0603382	0.79833	Dsim\GD15829	Scf_X	0.281391	0.233037	Dsec\GM12021	scaffold_32	0.603037	2.60848	CG9512-PA	X	0.0738157	1.03979	Dyak\GE16087	X	0.00659105	0.539669	Dyak\GE16087	X	0	1.3862	Dere\GG19435	scaffold_4690	0.00804116	0.691405	Dana\GF19427	scaffold_13335	0	0	Dpse\GA21846	XL_group1a	0.0093021	0.523171	Dper\GL27086	dper_scaffold_63	0	0.575588	FBpp0272821-D2_1	Muller-A	0.00392293	0.0546256	Dwil\GK19741	dwil_scf2_1100000004515	0.00380786	0.00958785
CG32791	st2	X	FBgn0052791	0.571471	1.9305	Dsim\GD16325	Scf_X	0.611768	1.52043	Dsec\GM12720	scaffold_4	3.15129	1.25043	CG32791-PA	X	4.91261	0.89136	Dyak\GE16888	X	0.0738417	0.275074	Dyak\GE16888	X	0.190619	0.0730256	Dere\GG18577	scaffold_4690	0.186996	0.665304	Dana\GF22310	scaffold_13248	0	0.0235674	Dpse\GA23218	XL_group1e	0.0531728	0.197643	Dper\GL15787	dper_scaffold_22	0	0.00707365	FBpp0273806-D1_1	Muller-A	0.0806519	0.243938	Dwil\GK16718	dwil_scf2_1100000004963	0.0128324	0.047664
eys	st2	2L	FBgn0031414	0.00302216	0.0564614	Dsim\GD23147	Scf_2L	0	0.0241475	Dsec\GM18332	scaffold_5	7.33702	0.713389	eys-PC	2L	7.59321	1.84353	Dyak\GE18127	2L	3.21504	1.61924	Dyak\GE18127	2L	1.70357	0.33477	Dere\GG24848	scaffold_4929	0.00454323	1.26727	Dana\GF14619	scaffold_12916	0	0.00557016	Dpse\GA20207	4_group3	0.00365898	0.141019	Dper\GL18721	dper_scaffold_1	8.17848	0.92544	FBpp0280028-D1_1	Muller-B	0.00209983	0.047141	Dwil\GK15151	dwil_scf2_1100000004521	0.612364	0.218246
CG9289	st2	2L	FBgn0032058	0.0070199	0.43813	Dsim\GD22389	Scf_2L	0	0.0149813	Dsec\GM12791	scaffold_3	13.6146	76.3512	CG9289-PA	2L	12.5017	26.4222	Dyak\GE10839	2L	0	0.0456885	Dyak\GE10839	2L	0.181235	0.946111	Dere\GG24058	scaffold_4929	0	0.0669807	Dana\GF14361	scaffold_12916	0.015183	0.750683	Dpse\GA21673	4_group5	0.00605267	1.17262	Dper\GL26221	dper_scaffold_5	0	2.5242	FBpp0285789-D1_1	Muller-B	3.07041	9.02197	Dwil\GK18668	dwil_scf2_1100000004884	0.143721	0.1497
CG9289	st5	2L	FBgn0032058	0.0070199	0.43813	Dsim\GD22389	Scf_2L	0	0.0149813	Dsec\GM12791	scaffold_3	13.6146	76.3512	CG9289-PA	2L	12.5017	26.4222	Dyak\GE10839	2L	0	0.0456885	Dyak\GE10839	2L	0.181235	0.946111	Dere\GG24058	scaffold_4929	0	0.0669807	Dana\GF14361	scaffold_12916	0.015183	0.750683	Dpse\GA21673	4_group5	0.00605267	1.17262	Dper\GL26221	dper_scaffold_5	0	2.5242	FBpp0285789-D1_1	Muller-B	3.07041	9.02197	Dwil\GK18668	dwil_scf2_1100000004884	0.143721	0.1497
CG5964	st5	3L	FBgn0036206	0	0.5052	Dsim\GD12775	Scf_3L	0	0.13555	Dsec\GM24710	scaffold_0	0.0120061	2.27288	CG5964-PA	3L	0.0454362	1.7578	Dyak\GE20179	3L	0.0169828	2.13145	Dyak\GE20179	3L	0.0780914	0.694574	Dere\GG13888	scaffold_4784	0.038586	0.471936	Dana\GF24512	scaffold_13337	0.00564059	0.150226	Dpse\GA19263	XR_group8	0.0138018	0.568237	Dper\GL20822	dper_scaffold_29	0.02558	0.0541614	FBpp0286904-D1_1	Muller-AD	0.00213724	0.0289729	Dwil\GK23606	dwil_scf2_1100000004837	0.0234224	0.424177
Pvr	st5	2L	FBgn0032006	0.00944482	1.11272	Dsim\GD22428	Scf_2L	0.00738403	1.03295	Dsec\GM13122	scaffold_3	0.0255732	5.61412	Pvr-PJ	2L	0.0474739	1.78856	Dyak\GE11101	2L	0.0205816	1.30506	Dyak\GE11101	2L	0.158011	0.396384	Dere\GG23464	scaffold_4929	0.00935668	0.768778	Dana\GF15270	scaffold_12916	0.00299087	0.363022	Dpse\GA20908	4_group3	0.0152408	1.64054	Dper\GL19392	dper_scaffold_1	0.00934873	1.37269	FBpp0280512-D1_1	Muller-B	0.030047	0.206477	Dwil\GK23859	dwil_scf2_1100000004516	0.0399883	20.9673
CG8945	st2	X	FBgn0030815	0.400287	0.837191	Dsim\GD15704	Scf_X	0.122346	0.390082	Dsec\GM13343	scaffold_17	2.74239	4.61778	CG8945-PC	X	5.27333	8.99712	Dyak\GE15623	X	0.00510543	0.00382949	Dyak\GE15623	X	0.0156511	0.00829237	Dere\GG18205	scaffold_4690	3.09134	3.1226	Dana\GF21828	scaffold_13334	0	0.0372	Dpse\GA21425	XL_group1e	0	0.00369599					FBpp0284434-D1_1	Muller-A	0	0.00307481	Dwil\GK17666	dwil_scf2_1100000004963	0.0681409	0.0528733
CG8945	st5	X	FBgn0030815	0.400287	0.837191	Dsim\GD15704	Scf_X	0.122346	0.390082	Dsec\GM13343	scaffold_17	2.74239	4.61778	CG8945-PC	X	5.27333	8.99712	Dyak\GE15623	X	0.00510543	0.00382949	Dyak\GE15623	X	0.0156511	0.00829237	Dere\GG18205	scaffold_4690	3.09134	3.1226	Dana\GF21828	scaffold_13334	0	0.0372	Dpse\GA21425	XL_group1e	0	0.00369599					FBpp0284434-D1_1	Muller-A	0	0.00307481	Dwil\GK17666	dwil_scf2_1100000004963	0.0681409	0.0528733
CG3822	st5	3R	FBgn0038837	0.0594255	0.840638	Dsim\GD20025	Scf_3R	0.00337312	0.685402	Dsec\GM23151	scaffold_27	0	1.35234	CG3822-PA	3R	0.441611	4.59575	Dyak\GE25031	3R	0.171485	0.980176	Dyak\GE25031	3R	0.090544	0.851321	Dere\GG15059	scaffold_4770	0.0578843	0.201519	Dana\GF17009	scaffold_13340	0.0066254	0.118172	Dpse\GA17711	2	0.00923074	1.59854	Dper\GL23254	dper_scaffold_0	0.00397089	0.169039	FBpp0283863-D1_1	Muller-E	0.0124022	3.31088	Dwil\GK22690	dwil_scf2_1100000004921	0	0.170462
CG1090	st5	3R	FBgn0037238	0.01121	1.22507	Dsim\GD19720	Scf_3R	0	1.11414	Dsec\GM10748	scaffold_6	0	1.61529	CG1090-PB	3R	0.0891949	1.41231	Dyak\GE25410	3R	0.0712903	2.62155	Dyak\GE25410	3R	0.411788	2.69058	Dere\GG12329	scaffold_4770	0	0.507165	Dana\GF18207	scaffold_13340	0.0170212	0.508409	Dpse\GA26275	2	0	0.0710546					FBpp0281341-D1_1	Muller-E	0	0.350879	Dwil\GK13526	dwil_scf2_1100000004943	0.00949311	0.0330988
RyR	st5	2R	FBgn0011286	0.00131542	2.25845	Dsim\GD10606	Scf_2R	0.00370225	0.0730389	Dsec\GM21070	scaffold_1	0	4.00294	Rya-r44F-PI	2R	11.4526	20.1061	Dyak\GE19231	2L	0.00052109	0.708616	Dyak\GE19231	2L	0	0.323277	Dere\GG23389	scaffold_4929	0.000718549	1.13607	Dana\GF12384	scaffold_13266	0.000968131	0	Dpse\GA10593	3	0.000409484	0.202007	Dper\GL17126	dper_scaffold_4	0	0.0631316	FBpp0307309-D1_1	Muller-C	0.00132609	0.175348	Dwil\GK20678	dwil_scf2_1100000004510	0.000445611	0.0147806
CG8563	st5	3L	FBgn0035777	0.00695248	0.694125	Dsim\GD14012	Scf_3L	0	0.0955342	Dsec\GM14839	scaffold_2	0	1.44985	CG8563-PA	3L	0	1.91164	Dyak\GE21613	3L	0	0.17086	Dyak\GE21613	3L	0	0.0578845	Dere\GG14422	scaffold_4784	0	0.0305241	Dana\GF10640	scaffold_13337	0.0116973	0	Dpse\GA21166	XR_group6	0.00588348	0.0965989	Dper\GL26374	dper_scaffold_12	1.72533e-22	0.292789	FBpp0274887-D1_1	Muller-AD	0	0.0533124	Dwil\GK17379	dwil_scf2_1100000004511	0	0
CG5987	st2	3R	FBgn0039501	0.0641899	10.4926	Dsim\GD15082	Scf_3R	0.00915864	3.32658	Dsec\GM10118	scaffold_13	3.58891	7.91994	CG5987-PA	3R	1.46246	5.35942	Dyak\GE10574	3R	0.00232106	0.344526	Dyak\GE10574	3R	0.00781068	0.0674853	Dere\GG12126	scaffold_4820	0.0410538	1.34915	Dana\GF18720	scaffold_13340	0.0143501	0.548671	Dpse\GA19278	2	0	0.36767	Dper\GL23051	dper_scaffold_0	1.46696	1.61983	FBpp0283664-D1_1	Muller-E	0	0.384649	Dwil\GK22594	dwil_scf2_1100000004921	2.15328	5.8326
alpha-Est2	st2	3R	FBgn0015570	0.0232576	2.97981	Dsim\GD19941	Scf_3R	0	1.4223	Dsec\GM10966	scaffold_6	11.5139	65.6345	alpha-Est2-PA	3R	200.305	1028.07	Dyak\GE11183	v2_chr3R_random_110	0.0110904	0.173286	Dyak\GE11183	v2_chr3R_random_110	0	0.0441974	Dere\GG14130	scaffold_4770	0.00743747	0.0331721	Dana\GF17678	scaffold_13340	0	0.0657001	Dpse\GA15379	2	6.08226	0.138426	Dper\GL12447	dper_scaffold_6	13.1527	0.0591084	FBpp0284746-D1_1	Muller-E	8.36445	0.279549	Dwil\GK12015	dwil_scf2_1100000004902	0.325115	0.591154
Pxn	st5	3L	FBgn0011828	0.00177747	0.197247	Dsim\GD13382	Scf_3L	0.0689	0.505654	Dsec\GM15030	scaffold_824	0.00786195	1.67156	Pxn-PA	3L	0.027266	1.37451	Dyak\GE21698	3L	0	0.069366	Dyak\GE21698	3L	0	0.0574639	Dere\GG14508	scaffold_4784	0	0.0643973	Dana\GF10247	scaffold_13337	0	0.51016	Dpse\GA11325	XR_group3a	0.001748	0.0396414	Dper\GL22623	dper_scaffold_23	0.00141484	0.113578	FBpp0278139-D1_1	Muller-AD	0	0.0124798	Dwil\GK12503	dwil_scf2_1100000004729	0.0226161	0.056797
Hex-C	st5	2R	FBgn0001187	0	0.608264	Dsim\GD25630	Scf_2R	0.0265745	0.709086	Dsec\GM20151	scaffold_1	0.0495489	1.05203	Hex-C-PA	2R	0.0164996	1.47818	Dyak\Hex-C	2R	0	0.561977	Dyak\Hex-C	2R	0	0.825019	Dere\GG22367	scaffold_4845	0	1.13175	Dana\GF12622	scaffold_13266	0	0.432037	Dpse\GA20820	3	0	0.942446	Dper\GL11018	dper_scaffold_2	0	0.701583	FBpp0277188-D2_1	Muller-A	30.968	1.76713	Dwil\GK21542	dwil_scf2_1100000004513	0	0.106804
spir	st5	2L	FBgn0003475	23.7341	1.53593	Dsim\GD24252	Scf_2L	28.4296	0.577606	Dsec\GM23344	scaffold_18	27.5677	2.16833	spir-PA	2L	24.7479	2.82697	Dyak\GE13304	2R	27.6476	1.00875	Dyak\GE13304	2R	24.4114	0.800224	Dere\GG21227	scaffold_4845	28.1233	0.42813	Dana\GF14534	scaffold_12916	28.9183	2.66724	Dpse\GA10053	4_group4	17.5095	0.993839	Dper\GL26604	dper_scaffold_10	37.9406	4.02776	FBpp0287803-D1_1	Muller-B	22.202	4.59733	Dwil\GK18263	dwil_scf2_1100000004577	32.9736	6.95839
Lgr1	st5	3R	FBgn0016650	0.151199	0.516822	Dsim\GD19184	Scf_3R	0.0704081	0.407372	Dsec\GM15260	scaffold_12	11.1884	1.97243	Fsh-PA	3R	0.137139	1.27715	Dyak\GE25496	3R	0.156994	0.928382	Dyak\GE25496	3R	0.0885387	0.549857	Dere\GG22471	scaffold_4770	0.346354	1.7574	Dana\GF23082	scaffold_12911	0.323773	0.862653					Dper\GL12392	dper_scaffold_6	0.0159357	0.718287					Dwil\GK22658	dwil_scf2_1100000004921	0.0223566	0.227184
CG42663	st2	2R	FBgn0261545	0.511528	0.769495	Dsim\GD10916	Scf_2R	0.2213	0.379117	Dsec\GM21421	scaffold_1	1.85231	0.433848	CG42663-PB	2R	3.09725	0.576266	Dyak\GE12492	2R	0.555626	1.39051	Dyak\GE12492	2R	0.938318	2.11665	Dere\GG20331	scaffold_4845	0.268926	0.687334	Dana\GF11809	scaffold_13266	0.0260253	0.131046	Dpse\GA24282	3	0.0119264	0.227604	Dper\GL16736	dper_scaffold_4	0.0107689	0.17368	FBpp0276306-D1_1	Muller-C	0.783872	0.251225	Dwil\GK21614	dwil_scf2_1100000004513	0.203094	0.835308
CG7794	st2	3R	FBgn0038565	0	0.84354	Dsim\GD19196	Scf_3R	0.0105338	1.29985e-08	Dsec\GM15273	scaffold_12	5.83584	12.539	CG7794-PA	3R	7.78973	21.0512	Dyak\GE25507	3R	1.81408	2.97327	Dyak\GE25507	3R	0.0443412	0.544996	Dere\GG22615	scaffold_4770	0.804348	1.96036	Dana\GF16752	scaffold_13340	0	0	Dpse\GA20592	2	9.15135	8.19976	Dper\GL12586	dper_scaffold_6	6.68042	9.46488	FBpp0284882-D1_1	Muller-E	9.01298e-47	0.0388881	Dwil\GK11238	dwil_scf2_1100000004902	0.00480989	0.0880235
ndl	st2	3L	FBgn0002926	0.114241	0.176384	Dsim\GD13121	Scf_3L	0.214435	0.286705	Dsec\GM13834	scaffold_2	2.23852	0.433726	ndl-PA	3L	2.69511	0.37258	Dyak\GE20478	3L	2.78496	0.360089	Dyak\GE20478	3L	0.0619914	0.138481	Dere\GG14054	scaffold_4784	0.157147	0.258144	Dana\GF10896	scaffold_13337	0.0150032	0.0122021	Dpse\GA10095	XR_group8	3.82822	0.207932					FBpp0286973-D1_1	Muller-AD	0.34049	0.0314361	Dwil\GK12588	dwil_scf2_1100000004729	0.236899	0.316451
CG9743	st2	3R	FBgn0039756	0.00649648	0.0773773	Dsim\GD17212	Scf_3R	0	0.0610799	Dsec\GM12168	scaffold_4	2.97548	1.05271	CG9743-PA	3R	4.16448	26.7792	Dyak\GE23401	3R	0.00728231	0.0150061	Dyak\GE23401	3R	5.54473	14.0194	Dere\GG11952	scaffold_4820	0	0.385167	Dana\GF16192	scaffold_13340	0.0130851	0	Dpse\GA22002	2	20.5568	2.46375	Dper\GL14059	dper_scaffold_7	17.8019	6.2603	FBpp0283139-D1_1	Muller-E	11.6267	3.65692	Dwil\GK13141	dwil_scf2_1100000004943	0.0602425	0.368395
CG9743	st5	3R	FBgn0039756	0.00649648	0.0773773	Dsim\GD17212	Scf_3R	0	0.0610799	Dsec\GM12168	scaffold_4	2.97548	1.05271	CG9743-PA	3R	4.16448	26.7792	Dyak\GE23401	3R	0.00728231	0.0150061	Dyak\GE23401	3R	5.54473	14.0194	Dere\GG11952	scaffold_4820	0	0.385167	Dana\GF16192	scaffold_13340	0.0130851	0	Dpse\GA22002	2	20.5568	2.46375	Dper\GL14059	dper_scaffold_7	17.8019	6.2603	FBpp0283139-D1_1	Muller-E	11.6267	3.65692	Dwil\GK13141	dwil_scf2_1100000004943	0.0602425	0.368395
Rpt6R	st2	3R	FBgn0039788	0.0776038	0.291913	Dsim\GD16958	Scf_3R	0.139536	0.118715	Dsec\GM12144	scaffold_4	1.25429	4.48576	Rpt6R-PA	3R	2.29283	1.7022	Dyak\GE23375	3R	0.036676	1.17941	Dyak\GE23375	3R	0	0.18822	Dere\GG11925	scaffold_4820	0.0104114	0.122374	Dana\GF23322	scaffold_12911	0.0566847	0	Dpse\GA26607	2	0.0304236	0.167462					FBpp0282251-D1_1	Muller-E	0.00673748	0.340349
Rpt6R	st5	3R	FBgn0039788	0.0776038	0.291913	Dsim\GD16958	Scf_3R	0.139536	0.118715	Dsec\GM12144	scaffold_4	1.25429	4.48576	Rpt6R-PA	3R	2.29283	1.7022	Dyak\GE23375	3R	0.036676	1.17941	Dyak\GE23375	3R	0	0.18822	Dere\GG11925	scaffold_4820	0.0104114	0.122374	Dana\GF23322	scaffold_12911	0.0566847	0	Dpse\GA26607	2	0.0304236	0.167462					FBpp0282251-D1_1	Muller-E	0.00673748	0.340349
srp	st2	3R	FBgn0003507	0.335818	85.4962	Dsim\GD19064	Scf_3R	1.37666	74.9981	Dsec\GM24275	scaffold_0	1.59449	59.2787	srp-PA	3R	2.54	75.729	Dyak\GE24357	3R	0.120794	129.759	Dyak\GE24357	3R	0.55582	181.911	Dere\GG16969	scaffold_4770	0.134594	109.951	Dana\GF11857	scaffold_13250	0.0970604	49.6937	Dpse\GA26230	2	0.0871155	82.3016	Dper\GL12212	dper_scaffold_6	0.0853778	152.098	FBpp0281238-D1_1	Muller-E	0.177883	66.2326	Dwil\GK22843	dwil_scf2_1100000004921	0.0394447	85.0338
Sas	st5	3R	FBgn0038045	0.0431736	0.534462	Dsim\GD18832	Scf_3R	0.0225321	0.266201	Dsec\GM24031	scaffold_0	0.109672	5.82038	Sas-PA	3R	0.0372413	1.48182	Dyak\GE26192	3R	0.0204853	0.0514363	Dyak\GE26192	3R	0.0150714	0	Dere\GG18905	scaffold_4770	0	0.247633	Dana\GF17956	scaffold_13340	0.0377265	0.323886	Dpse\GA18754	2	2.67402	7.37077	Dper\GL27311	dper_scaffold_19	0.00791889	0.238136	FBpp0283405-D1_1	Muller-E	7.02951	4.79197	Dwil\GK14403	dwil_scf2_1100000004943	0.00658483	0.605902
CG13313	st5	3L	FBgn0035941	0.057093	0.070974	Dsim\GD14140	Scf_3L	0.086966	0.669286	Dsec\GM25105	scaffold_0	0.0395174	3.71455	CG13313-PA	3L	0.35832	2.03712	Dyak\GE20791	3L	0.813158	4.50686	Dyak\GE20791	3L	0.154663	1.21932	Dere\GG14360	scaffold_4784	0.0245259	0.434984	Dana\GF24366	scaffold_13337	0	0.1353	Dpse\GA12194	XR_group8	2.24844	6.71783	Dper\GL20729	dper_scaffold_29	5.50452	7.99885	FBpp0286247-D1_1	Muller-AD	4.49896	8.01948	Dwil\GK16749	dwil_scf2_1100000004511	0.00283801	0.463583
Tsp42Ed	st2	2R	FBgn0029507	0.0122392	0.283059	Dsim\GD10280	Scf_2R	0.054399	0.0840101	Dsec\GM20827	scaffold_1	2.15785	1.9303	Tsp42Ed-PA	2R	12.7164	12.5765	Dyak\Tsp42Ed	2L	0	0.274521	Dyak\Tsp42Ed	2L	0	0.061307	Dere\GG10779	scaffold_4929	0	0	Dana\GF12681	scaffold_13266	19.2595	143.223	Dpse\GA11851	3	0.0181388	0.201388	Dper\GL11136	dper_scaffold_2	0.00701022	0.0372919	FBpp0277314-D1_1	Muller-C	0.0566335	22.0305	Dwil\GK21775	dwil_scf2_1100000004513	0.0143857	0
Tsp42Ed	st5	2R	FBgn0029507	0.0122392	0.283059	Dsim\GD10280	Scf_2R	0.054399	0.0840101	Dsec\GM20827	scaffold_1	2.15785	1.9303	Tsp42Ed-PA	2R	12.7164	12.5765	Dyak\Tsp42Ed	2L	0	0.274521	Dyak\Tsp42Ed	2L	0	0.061307	Dere\GG10779	scaffold_4929	0	0	Dana\GF12681	scaffold_13266	19.2595	143.223	Dpse\GA11851	3	0.0181388	0.201388	Dper\GL11136	dper_scaffold_2	0.00701022	0.0372919	FBpp0277314-D1_1	Muller-C	0.0566335	22.0305	Dwil\GK21775	dwil_scf2_1100000004513	0.0143857	0
m	st2	X	FBgn0002577	0.392603	0.0401948	Dsim\GD17048	Scf_X	0.0485289	0.166252	Dsec\GM13107	scaffold_36	1.54337	0.303228	m-PA	X	2.54861	0.189789	Dyak\GE15664	X	0.934431	0.100832	Dyak\GE15664	X	0.470681	0.0595372	Dere\GG18442	scaffold_4690	0.0495216	0.212595	Dana\GF20431	scaffold_13417	0.128847	0.0179507	Dpse\GA22785	XL_group1a	0	0.0281555	Dper\GL15150	dper_scaffold_28	0	0.0850164	FBpp0273026-D1_1	Muller-A	0	0.0279375	Dwil\GK16317	dwil_scf2_1100000004590	1.70491	1.85664
CG1909	st5	4	FBgn0039911	0.0643639	0.793069	Dsim\GD24408	Scf_4	0.198742	0.666845	Dsec\GM26802	scaffold_30	0.611501	2.85265	CG1909-PA	4	0.545512	4.78224	Dyak\GE14554	4	2.86464	3.74527	Dyak\GE14554	4	0.436627	0.868671	Dere\GG16394	scaffold_4512	0.0532391	0.505528	Dana\GF22689	scaffold_13767	0.243433	0.920614	Dpse\GA15125	Unknown_group_1	0	0.318521	Dper\GL18145	dper_scaffold_42	0.0222592	0.318727	FBpp0272509-D1_1	Muller-F	0	0.00954988	Dwil\GK13691	dwil_scf2_1100000004943	0	0.565641
side	st5	3R	FBgn0016061	0.00127776	4.25491	Dsim\GD18079	Scf_3R	0	2.74528	Dsec\GM10106	scaffold_13	0.0197264	3.13625	side-PA	3R	0	12.5573	Dyak\GE10563	3R	0	0.104049	Dyak\GE10563	3R	0	0.0291367	Dere\GG12115	scaffold_4820	0	0.0454513	Dana\GF18710	scaffold_13340	0	0.606698	Dpse\GA15977	2	0	0.112086	Dper\GL23588	dper_scaffold_0	0.00643937	0.122083	FBpp0297029-D1_1	Muller-E	0.00310027	0.0314265	Dwil\GK11337	dwil_scf2_1100000004902	0.0727974	0.164566
plum	st2	3R	FBgn0039431	2.06165	0.226696	Dsim\GD18134	Scf_3R	0.407219	0.0265583	Dsec\GM10182	scaffold_13	1.7268	0.0693219	CG6490-PB	3R	1.04722	0.103744	Dyak\GE10629	3R	0.414436	0.162892	Dyak\GE10629	3R	1.04916	0.0495496	Dere\GG12185	scaffold_4820	1.67234	0.183651	Dana\GF18881	scaffold_13340	1.36998	0.0933925	Dpse\GA19633	2	0.229759	0.0179092	Dper\GL23656	dper_scaffold_0	0.115714	0.00310114	FBpp0282442-D1_1	Muller-E	0.193428	0.0154711	Dwil\GK12145	dwil_scf2_1100000004902	9.11301	2.88778
PIP5K59B	st5	2R	FBgn0034789	0.385734	0.680646	Dsim\GD11719	Scf_2R	0.515498	1.99213	Dsec\GM15967	scaffold_9	0.00410615	1.48506	PIP5K59B-PG	2R	0.0074488	1.19552	Dyak\GE14244	2R	0.013144	0.12217	Dyak\GE14244	2R	0.0482896	0.0998896	Dere\GG22810	scaffold_4845	0	0.0754779	Dana\GF13551	scaffold_13266	0	0.0155107	Dpse\GA25087	3	0	0.0230489	Dper\GL10132	dper_scaffold_31	0.00348039	0.373218	FBpp0306333-D1_1	Muller-C	0.0035315	0.070496	Dwil\GK20789	dwil_scf2_1100000004510	1.27228	1.80996
CG10508	st5	3L	FBgn0037060	0.0420183	1.04735	Dsim\GD14941	Scf_3L	0.00924052	0.189297	Dsec\GM22348	scaffold_11	0.0528897	4.27157	CG10508-PF	3L	0.0100261	3.05383									Dere\GG16166	scaffold_4784	0.0186157	0.0283208	Dana\GF24301	scaffold_13337	0.0184636	0.0151571	Dpse\GA10361	XR_group6	0	0.0118677	Dper\GL24668	dper_scaffold_33	0.0158222	0.0294061	FBpp0275551-D1_1	Muller-AD	0.660362	0.483157	Dwil\GK16817	dwil_scf2_1100000004511	0.0236479	0.0606411
mew	st2	X	FBgn0004456	0.0262182	62.2965	Dsim\GD15896	Scf_X	0.862577	45.0792	Dsec\GM11503	scaffold_21	1.97737	63.0662	mew-PB	X	19.6946	82.3437	Dyak\GE16168	X	0.326773	44.7308	Dyak\GE16168	X	0.537938	63.7573	Dere\GG19513	scaffold_4690	7.41235	59.7081	Dana\GF20867	scaffold_13117	0.041877	41.9984	Dpse\GA14619	XL_group1a	0.0309857	29.6274	Dper\GL13410	dper_scaffold_26	0.0200356	86.6906	FBpp0273214-D1_1	Muller-A	0.260024	17.6483	Dwil\GK14819	dwil_scf2_1100000004963	0.0806049	35.857
CG13255	st2	3L	FBgn0040636	0.0354722	1.247	Dsim\GD14916	Scf_3L	0	1.20996	Dsec\GM22328	scaffold_11	2.82857	12.5358	CG13255-PA	3L	4.74168	23.149	Dyak\GE19715	3L	0.127564	2.26695	Dyak\GE19715	3L	0	1.89272	Dere\GG16145	scaffold_4784	0.369387	1.30055	Dana\GF24288	scaffold_13337	0	0.603192	Dpse\GA12156	XR_group6	0.0274642	0.222466	Dper\GL24374	dper_scaffold_12	0	0	FBpp0274725-D1_1	Muller-AD	0	1.7969	Dwil\GK19128	dwil_scf2_1100000004762	0	0.391655
CG17564	st5	2L	FBgn0032768	0	0.185027	Dsim\GD21768	Scf_2L	0	0.151679	Dsec\GM17018	scaffold_7	0	1.87303	CG17564-PB	2L	0	1.40237	Dyak\GE12659	2R	0	0.114491	Dyak\GE12659	2R	0	0.0373193	Dere\GG21640	scaffold_4845	0	0					Dpse\GA14557	4_group4	0	0.0784176	Dper\GL21116	dper_scaffold_16	0.00400529	1.47108	FBpp0288012-D1_1	Muller-B	0	0.130171	Dwil\GK23847	dwil_scf2_1100000004516	0.00512945	0.0271638
kek6	st2	3R	FBgn0039862	0.0386411	0.138907	Dsim\GD21593	Scf_3R	0.0402172	0.0445652	Dsec\GM16439	scaffold_31	1.00991	0.11663	kek6-PA	3R	1.70803	0.274471	Dyak\GE10955	3R	0.976338	0.215796	Dyak\GE10955	3R	0.442609	0.0535743	Dere\GG11822	scaffold_4820	0.0402287	0.588381	Dana\GF22977	scaffold_12911	0.00572904	0.025882	Dpse\GA14773	2	0.0163019	0.0307317	Dper\GL23990	dper_scaffold_0	0.00109372	0.0378672	FBpp0298807-D1_1	Muller-E	0	0	Dwil\GK12112	dwil_scf2_1100000004902	0.00957309	0.110165
CG13282	st2	2L	FBgn0032612	0.0467641	0.777856	Dsim\GD21893	Scf_2L	0.246025	0.982658	Dsec\GM17154	scaffold_7	8.53594	25.6086	CG13282-PA	2L	1.63206	3.71089	Dyak\GE13160	2R	0.637953	2.62957	Dyak\GE13160	2R	0	0.0524314	Dere\GG20104	scaffold_4845	0	0.0352421	Dana\GF14541	scaffold_12916	0	0.1488	Dpse\GA12169	4_group3	2.31961e-258	1.74401	Dper\GL19328	dper_scaffold_1	0	0.400265	FBpp0280453-D1_1	Muller-B	0	0.436745	Dwil\GK18152	dwil_scf2_1100000004577	0	0
CG13282	st5	2L	FBgn0032612	0.0467641	0.777856	Dsim\GD21893	Scf_2L	0.246025	0.982658	Dsec\GM17154	scaffold_7	8.53594	25.6086	CG13282-PA	2L	1.63206	3.71089	Dyak\GE13160	2R	0.637953	2.62957	Dyak\GE13160	2R	0	0.0524314	Dere\GG20104	scaffold_4845	0	0.0352421	Dana\GF14541	scaffold_12916	0	0.1488	Dpse\GA12169	4_group3	2.31961e-258	1.74401	Dper\GL19328	dper_scaffold_1	0	0.400265	FBpp0280453-D1_1	Muller-B	0	0.436745	Dwil\GK18152	dwil_scf2_1100000004577	0	0
fne	st5	X	FBgn0086675	0.0203227	0.261476	Dsim\GD17091	Scf_X	0.00319815	0.770391	Dsec\GM11591	scaffold_21	0	2.41074	fne-PA	X	0.0441541	1.10257	Dyak\fne	X	0	0.331507	Dyak\fne	X	0	0.700895	Dere\GG17743	scaffold_4690	0	0.203567	Dana\GF21392	scaffold_13117	0	0.234867	Dpse\GA22283	XL_group3a	0	0.0925868	Dper\GL22975	dper_scaffold_52	0.0038283	0.0894481	FBpp0272141-D1_1	Muller-AD	0.00745234	0.0960523	Dwil\GK25647	dwil_scf2_1100000004909	0	0.0577793
PGRP-LD	st5		FBgn0260458			Dsim\GD13901	Scf_3L	0.468918	0.680028	Dsec\GM14721	scaffold_2	20.4951	5.11889	PGRP-LD-PD	3L	0	1.41539	Dyak\GE21510	3L	0	0.525923	Dyak\GE21510	3L	0.0234208	0.595335	Dere\GG15287	scaffold_4784	0	0.251893	Dana\GF23994	scaffold_13337	15.0665	1.47121	Dpse\GA23439	XR_group6	0	0.424393	Dper\GL16311	dper_scaffold_61	0	0.639529	FBpp0274212-D1_1	Muller-AD	17.0682	3.5816	Dwil\GK16886	dwil_scf2_1100000004511	0.294139	0.259592
stnB	st5		FBgn0016975			Dsim\GD17270	Scf_X	0.0473407	0.321261	Dsec\GM10054	scaffold_39	33.543	24.8976	stnB-PE	X	0.304087	1.8285	Dyak\GE15258	X	0.0219756	0.0560783	Dyak\GE15258	X	0.0045544	0.177245	Dere\GG17501	scaffold_4690	0	0.00833093	Dana\GF22155	scaffold_12929	0.00696203	0.0383208	Dpse\GA23086	XL_group1a	0.0301136	0.456435	Dper\GL16536	dper_scaffold_15	0.0603497	1.4785					Dwil\GK20028	dwil_scf2_1100000004515	0.0193614	0.037324
1 to 0
CG2321	st5	3R	FBgn0039663	12.8429	4.57885	Dsim\GD17786	Scf_3R	13.6555	1.60867	Dsec\GM12243	scaffold_4	5.5075	0.754467	CG2321-PA	3R	6.37787	0.591721	Dyak\GE10454	3R	5.50226	2.43271	Dyak\GE10454	3R	1.56972	0.262574	Dere\GG12018	scaffold_4820	2.17238	2.71662	Dana\GF22890	scaffold_12911	16.2594	3.01023	Dpse\GA15348	2	5.89937	6.24022	Dper\GL13591	dper_scaffold_7	9.19227	6.59462	FBpp0282846-D1_1	Muller-E	6.41844	1.19777	Dwil\GK11030	dwil_scf2_1100000004902	2.45866	4.64341
CG10505	st5	2R	FBgn0034612	0.204829	4.45163	Dsim\GD25211	Scf_2R	0.304507	3.28922	Dsec\GM15734	scaffold_9	0.00870218	0.0958462	CG10505-PA	2R	0.0148342	0.584892	Dyak\GE13726	2R	0.00576103	0.0511861	Dyak\GE13726	2R	39.797	25.7496	Dere\GG20788	scaffold_4845	1.87388	1.57711	Dana\GF12109	scaffold_13266	0.00350866	0.0837813	Dpse\GA10359	3	1.11954	3.60313	Dper\GL10757	dper_scaffold_2	0.929698	13.7735	FBpp0276924-D1_1	Muller-C	0.37515	2.117	Dwil\GK21659	dwil_scf2_1100000004513	0.00843204	2.44354
CG34008	st2	3R	FBgn0054008	13.1871	27.3955	Dsim\GD20053	Scf_3R	5.22973	12.2054	Dsec\GM23180	scaffold_27	1.00745e-78	0.394323	CG34008-PA	3R	1.82566e-237	0.817661	Dyak\GE25061	3R	4.82939	1.6051	Dyak\GE25061	3R	15.5361	11.559	Dere\GG15346	scaffold_4770	20.2106	9.73726	Dana\GF19940	scaffold_13340	3.93907	23.6957	Dpse\GA26967	2	12.3736	64.6304	Dper\GL13927	dper_scaffold_7	11.4251	66.7063	FBpp0283223-D1_1	Muller-E	18.1068	162.437	Dwil\GK22716	dwil_scf2_1100000004921	8.27693e-16	17.7135
CG34008	st5	3R	FBgn0054008	13.1871	27.3955	Dsim\GD20053	Scf_3R	5.22973	12.2054	Dsec\GM23180	scaffold_27	1.00745e-78	0.394323	CG34008-PA	3R	1.82566e-237	0.817661	Dyak\GE25061	3R	4.82939	1.6051	Dyak\GE25061	3R	15.5361	11.559	Dere\GG15346	scaffold_4770	20.2106	9.73726	Dana\GF19940	scaffold_13340	3.93907	23.6957	Dpse\GA26967	2	12.3736	64.6304	Dper\GL13927	dper_scaffold_7	11.4251	66.7063	FBpp0283223-D1_1	Muller-E	18.1068	162.437	Dwil\GK22716	dwil_scf2_1100000004921	8.27693e-16	17.7135
CG14963	st5	3L	FBgn0035409	0.540616	3.86388	Dsim\GD13352	Scf_3L	1.03721	2.25336	Dsec\GM14077	scaffold_2	0	0.777463	CG14963-PA	3L	0.0271114	0.267408	Dyak\GE20712	3L	0.0481425	4.52883	Dyak\GE20712	3L	0	5.12697	Dere\GG14283	scaffold_4784	0	10.2055	Dana\GF10217	scaffold_13337	0.715002	4.71422	Dpse\GA13388	XR_group6	0	0.0159107	Dper\GL25249	dper_scaffold_9	0.0104673	0.040126	FBpp0275068-D1_1	Muller-AD	0	0.264484	Dwil\GK13226	dwil_scf2_1100000004762	0	0.544196
Reph	st5	2L	FBgn0021800	23.5621	6.1393	Dsim\GD23257	Scf_2L	17.7774	2.19938	Dsec\GM18440	scaffold_5	18.5506	1.62279	l(2)k16918-PB	2L	16.3077	1.65883	Dyak\GE18261	2L	14.6383	4.00211	Dyak\GE18261	2L	14.0788	2.1491	Dere\GG24970	scaffold_4929	7.71475	6.51352	Dana\GF15037	scaffold_12916	5.63567	0.569242	Dpse\GA17774	4_group3	0.64524	2.27543	Dper\GL18680	dper_scaffold_1	2.82749	4.53581	FBpp0279980-D1_1	Muller-B	0.91252	1.8805	Dwil\GK14652	dwil_scf2_1100000004521	16.3119	15.9179
CG13924	st5	3L	FBgn0035286	0.0142761	1.69128	Dsim\GD13655	Scf_3L	0.0188829	1.36189	Dsec\GM14455	scaffold_2	0.0189721	0.149366	CG13924-PC	3L	0	0.72642	Dyak\GE21196	3L	0.663316	1.35003	Dyak\GE21196	3L	0	0.505902	Dere\GG14833	scaffold_4784	6.03322	16.3538	Dana\GF24844	scaffold_13337	0.0106042	0.189728	Dpse\GA12629	XR_group6	1.26481e-123	0.75308	Dper\GL25315	dper_scaffold_9	0	0.0512203	FBpp0275125-D1_1	Muller-AD	0	0	Dwil\GK12209	dwil_scf2_1100000004762	0.00317294	0.0663637
rtv	st5	X	FBgn0261277	0.0951013	2.23715	Dsim\GD24538	Scf_X	0	3.30129	Dsec\GM11260	scaffold_15	0.341882	0.628375	rtv-PA	X	0.316843	0.163958	Dyak\GE17315	X	0.947303	0.721285	Dyak\GE17315	X	0.687826	0	Dere\GG18875	scaffold_4690	0.407457	3.18559	Dana\GF22363	scaffold_13248	0.0427664	1.01526	Dpse\GA12667	XL_group1e	4.03334	20.2829	Dper\GL20306	dper_scaffold_17	15.4295	51.2991	FBpp0287325-D1_1	Muller-A	6.51419	33.8387	Dwil\GK18863	dwil_scf2_1100000004909	0	4.27531
CG34348	st5	X	FBgn0085377	14.2221	9.79294	Dsim\GD17011	Scf_X	12.6249	1.62817	Dsec\GM11469	scaffold_15	18.8694	0.903765	CG34348-PA	X	11.8204	0.823597	Dyak\GE15922	X	20.6064	16.0886	Dyak\GE15922	X	21.3127	15.2055	Dere\GG18403	scaffold_4690	21.213	26.2787	Dana\GF21763	scaffold_13334	17.7356	11.9653	Dpse\GA11177	XL_group3b	43.7315	2.66816	Dper\GL22433	dper_scaffold_56	57.9006	2.25252	FBpp0285481-D1_1	Muller-AD	61.3141	2.17376	Dwil\GK18856	dwil_scf2_1100000004909	12.0975	2.66892
CG4404	st5	X	FBgn0030432	27.6649	1.89045	Dsim\GD24528	Scf_X	16.7145	2.98835	Dsec\GM11525	scaffold_21	5.15514	0.695913	CG4404-PA	X	9.4426	1.38802	Dyak\GE16190	X	7.49415	1.63151	Dyak\GE16190	X	16.6144	2.64508	Dere\GG19531	scaffold_4690	15.9035	2.67134	Dana\GF20883	scaffold_13117	31.6162	4.87688	Dpse\GA18161	XL_group3a	13.8621	0.376277	Dper\GL22959	dper_scaffold_52	0.0537125	0.011854	FBpp0272323-D1_1	Muller-AD	1.00456	0.0647465	Dwil\GK16390	dwil_scf2_1100000004590	26.8137	2.78274
CG5414	st5	3L	FBgn0036569	4.54533	3.5162	Dsim\GD14596	Scf_3L	6.77482	1.06923	Dsec\GM25585	scaffold_0	9.216	0.523251	CG5414-PB	3L	3.58537	0.981301									Dere\GG15950	scaffold_4784	11.458	3.0397	Dana\GF23767	scaffold_13337	5.6119	4.67473	Dpse\GA18866	XR_group6	10.3063	6.11714	Dper\GL25089	dper_scaffold_9	12.6528	5.41718					Dwil\GK24181	dwil_scf2_1100000004837	7.46429	6.81273
CG44325	st5	X	FBgn0265413	0.22289	5.51824	Dsim\GD16087	Scf_X	0.552236	2.32109	Dsec\GM13685	scaffold_34	1.33702e-134	0.154552	CG7267-PB	X	0	1.87131e-131	Dyak\GE17420	X	0	0.0682594	Dyak\GE17420	X	0.0399908	6.14127	Dere\GG19007	scaffold_4690	6.04632	18.326	Dana\GF19114	scaffold_13047	0.125796	0.327715	Dpse\GA20224	XL_group1e	0	0.146596	Dper\GL13023	dper_scaffold_13	0	0	FBpp0280325-D1_1	Muller-A	0	0	Dwil\GK16752	dwil_scf2_1100000004963	0.0258642	0.0618153
CG2909	st2	X	FBgn0030189	3.16285	9.06068	Dsim\GD24700	Scf_X	1.39869	14.5975	Dsec\GM11417	scaffold_15	0.991106	9.60163	CG2909-PA	X	0.530004	15.0749	Dyak\GE17840	X	21.4772	41.5158	Dyak\GE17840	X	1.25684	4.13983	Dere\GG18351	scaffold_4690	1.26016	13.1851	Dana\GF19418	scaffold_13335	1.11666	10.2989	Dpse\GA15510	XL_group1a	28.1324	3.26217	Dper\GL26843	dper_scaffold_25	26.5844	1.42261	FBpp0272714-D1_1	Muller-A	23.4016	3.11261
Drat	st5	2R	FBgn0033188	0.00346565	4.80475	Dsim\GD10242	Scf_2R	0.139054	1.7058	Dsec\GM20780	scaffold_1	0.0106539	0.591107	CG1600-PC	2R	0	0.884872	Dyak\GE23849	2L	0.901387	3.66312	Dyak\GE23849	2L	0	3.14861	Dere\GG10734	scaffold_4929	0	27.7561	Dana\GF11713	scaffold_13266	0	0.0617326	Dpse\GA14040	3	0.252292	14.7301	Dper\GL20107	dper_scaffold_44	0.0242727	6.7908	FBpp0278275-D1_1	Muller-C	0	7.06502	Dwil\GK10697	dwil_scf2_1100000004382	0.0133784	0.88462
wit	st5	3L	FBgn0024179	0.45697	2.43682	Dsim\GD13298	Scf_3L	11.0732	6.72561	Dsec\GM14019	scaffold_2	7.4819	0.0828888	wit-PA	3L	10.3168	1.0243	Dyak\GE20653	3L	0.669524	1.98076	Dyak\GE20653	3L	0.683071	0.441296	Dere\GG14225	scaffold_4784	4.61115	2.91216	Dana\GF24409	scaffold_13337	2.74729	0.27205	Dpse\GA10555	XR_group6	4.71944	0.141683	Dper\GL16800	dper_scaffold_82	7.43037	0.121347	FBpp0275207-D1_1	Muller-AD	3.00478	0.1924	Dwil\GK18023	dwil_scf2_1100000004822	25.7675	3.77599
CG8319	st5	3R	FBgn0037722	35.3149	4.43576	Dsim\GD18633	Scf_3R	25.0469	2.10917	Dsec\GM23822	scaffold_0	24.9785	0.463725	CG8319-PA	3R	43.9182	0.57421	Dyak\GE25969	3R	22.6284	5.19456	Dyak\GE25969	3R	23.9764	0.547645	Dere\GG16971	scaffold_4770	30.4122	8.49531	Dana\GF17155	scaffold_13340	38.7256	3.66726	Dpse\GA26362	2	25.0033	7.00485	Dper\GL21659	dper_scaffold_3	13.9222	2.33502e-18	FBpp0281549-D1_1	Muller-E	44.0154	12.5117	Dwil\GK13252	dwil_scf2_1100000004943	17.2091	14.4923
CG18476	st5	3R	FBgn0037931	7.96303	3.43378	Dsim\GD20647	Scf_3R	6.48601	3.81589	Dsec\GM26084	scaffold_0	6.15511	0.911986	CG18476-PA	3R	5.60614	0.628472	Dyak\GE10099	3R	5.59521	8.14106	Dyak\GE10099	3R	3.26526	0.72888	Dere\GG17206	scaffold_4770	5.02328	6.30031	Dana\GF16627	scaffold_13340	12.5356	17.6969	Dpse\GA14950	2	12.5937	10.5955	Dper\GL12260	dper_scaffold_6	16.3358	15.7535	FBpp0284687-D1_1	Muller-E	12.9349	23.0094	Dwil\GK11228	dwil_scf2_1100000004902	14.0822	12.5555
CenG1A	st5	2L	FBgn0028509	12.9219	4.18579	Dsim\GD23935	Scf_2L	12.3444	13.2204	Dsec\GM15341	scaffold_3	13.6463	2.18799	cenG1A-PB	2L	14.0419	0.637156	Dyak\GE18693	2L	17.947	4.5199	Dyak\GE18693	2L	16.8106	2.04136	Dere\GG23894	scaffold_4929	13.4613	2.47264	Dana\GF14267	scaffold_12916	13.6947	3.76854	Dpse\GA16495	4_group4	5.32641	3.78132	Dper\GL21243	dper_scaffold_16	14.784	6.34523	FBpp0287331-D1_1	Muller-B	4.9504	1.88233	Dwil\GK15018	dwil_scf2_1100000004521	21.8645	6.72196
CG15356	st5	2L	FBgn0031377	23.3075	4.61851	Dsim\GD22882	Scf_2L	22.5299	1.44615	Dsec\GM16578	scaffold_14	72.6296	0.763116	CG15356-PA	2L	20.5028	1.33984	Dyak\GE15283	2L	22.8208	1.67375	Dyak\GE15283	2L	19.5978	1.52991	Dere\GG24565	scaffold_4929	18.3535	3.08451	Dana\GF15314	scaffold_12916	23.8807	1.86546	Dpse\GA13668	4_group3	15.2228	2.17523	Dper\GL18460	dper_scaffold_1	34.5231	3.76644	FBpp0279745-D1_1	Muller-B	14.4494	2.71624	Dwil\GK24815	dwil_scf2_1100000004585	30.1748	3.95885
Tap42	st5	2L	FBgn0051852	39.6277	13.0155	Dsim\GD23892	Scf_2L	30.3352	8.90994	Dsec\GM10432	scaffold_16	3.30987	3.30914e-06	Tap42-PA	2L	24.6868	2.93143e-06	Dyak\GE18648	2L	34.7077	45.9594	Dyak\GE18648	2L	25.2076	5.1148	Dere\GG23843	scaffold_4929	20.2881	22.1605	Dana\GF23124	scaffold_12943	15.7385	4.81656e-05	Dpse\GA16525	4_group1	7.33656	80.0261									Dwil\GK14840	dwil_scf2_1100000004521	17.6231	119.997
GstE9	st5	2R	FBgn0063491	1.8292	6.22199	Dsim\GD11378	Scf_2R	0.13328	1.16995	Dsec\GM21883	scaffold_1	0.0247801	0.828126	GstE9-PA	2R	0	0.94672	Dyak\GE11966	2R	5.36583	3.42815	Dyak\GE11966	2R	0.0637282	1.80886	Dere\GG21891	scaffold_4845	0	2.15086	Dana\GF12175	scaffold_13266	4.46416	4.6422	Dpse\GA14548	3	0	0.79651	Dper\GL17774	dper_scaffold_4	3.86031	1.01023	FBpp0278198-D1_1	Muller-C	0.0299642	1.30693	Dwil\GK22992	dwil_scf2_1100000004954	7.37055	3.22973
CalpC	st5	X	FBgn0260450	7.25618	1.11708	Dsim\GD17276	Scf_X	13.139	12.7301	Dsec\GM13427	scaffold_17	1.29767	0.654946	CalpC-PA	X	0	1.181e-232	Dyak\GE17262	X	14.0819	1.61651	Dyak\GE17262	X	15.4078	8.30867	Dere\GG17954	scaffold_4690	1.20043	8.82263	Dana\GF19104	scaffold_13137	12.607	35.3034	Dpse\GA17616	XL_group1e	24.8831	1.56577	Dper\GL15828	dper_scaffold_22	48.0393	1.777	FBpp0274121-D1_1	Muller-A	31.8646	2.34442	Dwil\GK25057	dwil_scf2_1100000004909	0.408198	2.26567
Smn	st5	3L	FBgn0036641	58.7458	114.895	Dsim\GD12460	Scf_3L	92.7063	34.0249	Dsec\GM24389	scaffold_0	41.2384	4.19509e-06	Smn-PA	3L	18.6719	0.119646	Dyak\GE22210	3L	92.0317	59.0942	Dyak\GE22210	3L	46.4414	42.1966	Dere\GG15871	scaffold_4784	108.387	22.6596	Dana\GF10520	scaffold_13337	106.161	17.5674	Dpse\GA14108	XR_group8	65.4654	277.062	Dper\GL17981	dper_scaffold_24	73.4149	333.652	FBpp0286393-D1_1	Muller-AD	72.1479	469.661	Dwil\GK19792	dwil_scf2_1100000004540	54.843	37.3932
CG8026	st5		FBgn0033391			Dsim\GD10092	Scf_2R	87.5926	1.4513	Dsec\GM20618	scaffold_1	110.663	1.33758	CG8026-PD	2R	108.889	1.04206	Dyak\GE22456	2L	101.526	5.94128	Dyak\GE22456	2L	87.071	3.72505	Dere\GG10572	scaffold_4929	81.412	9.00545	Dana\GF12007	scaffold_13266	36.2905	0.210719	Dpse\GA20774	3	56.4116	30.9588	Dper\GL17458	dper_scaffold_4	119.164	26.0075	FBpp0307342-D1_1	Muller-C	55.571	31.983	Dwil\GK22863	dwil_scf2_1100000004954	41.9836	46.0679
Transitions ere_yak_san to yak_san
0 to 1
CG16786	st5	2R	FBgn0034974	0.00280347	0.160793	Dsim\GD15461	Scf_2R	0.0221916	0.0333843	Dsec\GM18304	scaffold_5	0.0649396	0.318289	CG16786-PB	2R	0.0222124	0.278549	Dyak\GE14377	2R	0.00900411	2.95538	Dyak\GE14377	2R	0.00689004	1.30681	Dere\GG22939	scaffold_4845	0	0.927544	Dana\GF11370	scaffold_13266	0	0.0414986	Dpse\GA14148	3	0.0132298	0.0464914	Dper\GL11665	dper_scaffold_2	0.0101198	0.0818036					Dwil\GK21920	dwil_scf2_1100000004513	0.0374249	0.282433
Ggt-1	st5	X	FBgn0030932	146.479	0.661508	Dsim\GD24475	Scf_X	90.0414	0.319324	Dsec\GM22803	scaffold_8	45.4712	0.49231	CG6461-PA	X	63.209	0.30699	Dyak\GE15517	X	118.325	7.24444	Dyak\GE15517	X	107.63	5.19628	Dere\GG18112	scaffold_4690	70.6735	0.341849	Dana\GF22409	scaffold_13248	69.828	0.361354	Dpse\GA19613	XL_group3a	25.2938	0.0382328	Dper\GL27026	dper_scaffold_39	58.4133	0.104828	FBpp0272208-D1_1	Muller-A	21.6201	0.0839986	Dwil\GK16403	dwil_scf2_1100000004590	34.901	0.0614311
CG13082	st2	2L	FBgn0032803	0.111251	0.401246	Dsim\GD24220	Scf_2L	0.0332922	0.022574	Dsec\GM17362	scaffold_7	0.248423	0.436898	CG13082-PA	2L	0.107802	0.0813592	Dyak\GE13267	2R	2.62281	2.87638	Dyak\GE13267	2R	1.06753	1.73446	Dere\GG21193	scaffold_4845	0.0642545	0.507503	Dana\GF14246	scaffold_12916	0.409761	0.426987	Dpse\GA12032	4_group1	0.016165	0.511425	Dper\GL26086	dper_scaffold_5	0.0283247	0.244462	FBpp0279071-D1_1	Muller-B	0.0231356	0.506661	Dwil\GK24379	dwil_scf2_1100000004585	0	5.46594
CG13082	st5	2L	FBgn0032803	0.111251	0.401246	Dsim\GD24220	Scf_2L	0.0332922	0.022574	Dsec\GM17362	scaffold_7	0.248423	0.436898	CG13082-PA	2L	0.107802	0.0813592	Dyak\GE13267	2R	2.62281	2.87638	Dyak\GE13267	2R	1.06753	1.73446	Dere\GG21193	scaffold_4845	0.0642545	0.507503	Dana\GF14246	scaffold_12916	0.409761	0.426987	Dpse\GA12032	4_group1	0.016165	0.511425	Dper\GL26086	dper_scaffold_5	0.0283247	0.244462	FBpp0279071-D1_1	Muller-B	0.0231356	0.506661	Dwil\GK24379	dwil_scf2_1100000004585	0	5.46594
tara	st2	3R	FBgn0040071	0.701214	10.3372	Dsim\GD19083	Scf_3R	2.08345	8.69985	Dsec\GM15140	scaffold_12	0.956137	7.62564					Dyak\GE24381	3R	2.47119	10.0467	Dyak\GE24381	3R	1.49987	6.54193	Dere\GG16988	scaffold_4770	1.71162	15.0357	Dana\GF23054	scaffold_12911	0.00508786	4.12327	Dpse\GA19931	2	0.0207051	7.28673	Dper\GL12361	dper_scaffold_6	0.0413657	16.8782	FBpp0301240-D1_1	Muller-E	0.0501832	6.3376	Dwil\GK14470	dwil_scf2_1100000004943	0.00975461	10.5622
sdt	st2	X	FBgn0261873	1.18162	108.896					Dsec\GM11239	scaffold_44	1.57288	75.8509	sdt-PG	X	1.15915	75.8578	Dyak\GE15771	X	2.67158	141.115	Dyak\GE15771	X	1.88896	93.7966	Dere\GG19306	scaffold_4690	1.67429	147.748	Dana\GF20363	scaffold_13417	0.011002	58.0143	Dpse\GA17100	XL_group1e	0.0132505	42.6212	Dper\GL20368	dper_scaffold_17	0.00280752	155.393	FBpp0287923-D1_1	Muller-A	432.563	7982.48	Dwil\GK25185	dwil_scf2_1100000004909	1.01383	102.585
CG15412	st2	2L	FBgn0031528	0.0244318	2.50273	Dsim\GD22761	Scf_2L	0.0161955	4.24141	Dsec\GM18150	scaffold_5	0.0450354	2.14309	CG15412-PB	2L	0.126738	2.49332	Dyak\GE14886	2L	5.50897	33.1322	Dyak\GE14886	2L	6.20249	39.405	Dere\GG24444	scaffold_4929	0	3.31544	Dana\GF15683	scaffold_12916	0.147116	0.17683	Dpse\GA13710	4_group3	7.68857	13.9063	Dper\GL19521	dper_scaffold_1	0	0.226958					Dwil\GK14597	dwil_scf2_1100000004521	0.00509448	0.117476
Ctr1B	st5	3R	FBgn0062412	0	0.454612	Dsim\GD15144	Scf_3R	0.0116304	0.214335	Dsec\GM23723	scaffold_0	0	0.583068	Ctr1B-PA	3R	0	0.821372	Dyak\GE25868	3R	0	1.97954	Dyak\GE25868	3R	0	8.78367	Dere\GG25028	scaffold_4770	0	0.651668	Dana\GF18342	scaffold_13340	0.0352793	0.0974961	Dpse\GA20368	2	0.0300876	0.401615	Dper\GL23430	dper_scaffold_0	0	1.53458	FBpp0284032-D1_1	Muller-E	0.0267938	0.241424	Dwil\GK13179	dwil_scf2_1100000004943	0	2.18925
5-HT2A	st5	3R	FBgn0087012	0.0153226	13.7777	Dsim\GD19740	Scf_3R	0.00552041	0.311118	Dsec\GM10765	scaffold_6	0.00514366	0.473658	5-HT2-PB	3R	0.0153985	0.759987	Dyak\GE25425	3R	59.2154	78.5085	Dyak\GE25425	3R	1.19351	2.02199	Dere\GG12484	scaffold_4770	0.0404908	0.316042	Dana\GF16662	scaffold_13340	0	0.0140186	Dpse\GA10393	2	0	0	Dper\GL22070	dper_scaffold_3	0.00844152	0	FBpp0300494-D1_1	Muller-E	0	0	Dwil\GK13828	dwil_scf2_1100000004943	0.00591211	0.00268882
Itgbetanu	st5	2L	FBgn0010395	0.217652	0.522704					Dsec\GM23386	scaffold_18	1.81855	0.926038	betaInt-nu-PA	2L	2.45496	2.76309	Dyak\GE12889	2R	9.74407	2.44319	Dyak\GE12889	2R	2.0646	5.80391	Dere\GG21271	scaffold_4845	0.093993	0.121148	Dana\GF21041	scaffold_12943	28.3045	0.488872	Dpse\GA14581	4_group1	0.0323179	0.0160806	Dper\GL25882	dper_scaffold_5	0.00904682	0.0122108	FBpp0278864-D1_1	Muller-B	0.0117609	0.0397929	Dwil\GK24312	dwil_scf2_1100000004585	0	0.00837985
GstO3	st5	3L	FBgn0035904	0.936124	0.428501	Dsim\GD14099	Scf_3L	0.0437791	0	Dsec\GM25061	scaffold_0	23.7977	2.73079	CG6776-PA	3L	1.22648	0.643792	Dyak\GE20748	3L	10.7239	38.2726	Dyak\GE20748	3L	0.536254	2.19101	Dere\GG14320	scaffold_4784	0	3.43646e-06	Dana\GF24330	scaffold_13337	0.0537528	0.341433	Dpse\GA23844	XR_group6	3.58158	9.91022	Dper\GL15503	dper_scaffold_35	0.507611	3.85249					Dwil\GK20354	dwil_scf2_1100000004768	0.338257	0.629402
CG11796	st2	3L	FBgn0036992	0.326824	5.06975	Dsim\GD12185	Scf_3L	0.15459	0.940058	Dsec\GM22213	scaffold_11	0.0706039	1.63917	CG11796-PA	3L	0.0357706	4.76418	Dyak\GE22742	v2_chr3L_random_233	14.8088	10.7203	Dyak\GE22742	v2_chr3L_random_233	11.0325	4.02951	Dere\GG13309	scaffold_4784	0.0436415	1.85474	Dana\GF24132	scaffold_13337	0.191707	2.40449	Dpse\GA11203	XR_group8	0.0574812	0.0459679	Dper\GL12777	dper_scaffold_40	0.0244994	0.0919745	FBpp0286060-D1_1	Muller-AD	1.22322	0.0637982	Dwil\GK12342	dwil_scf2_1100000004830	0.0699305	0.38588
CG14291	st2	3R	FBgn0038660	0.0715869	3.15689	Dsim\GD20144	Scf_3R	0.551553	3.56247	Dsec\GM18674	scaffold_5	0.195798	1.76868	CG14291-PA	3R	0.276381	7.05035	Dyak\GE25163	3R	5.38769	14.5071	Dyak\GE25163	3R	1.07849	8.53638	Dere\GG16284	scaffold_4770	0.541022	0.348926	Dana\GF23012	scaffold_12911	1.28295	4.66125	Dpse\GA12883	2	0.011498	0.188689	Dper\GL24108	dper_scaffold_0	0	0.0131249	FBpp0281961-D1_1	Muller-E	0.0156348	0.0268706	Dwil\GK22437	dwil_scf2_1100000004921	0	0.131577
jeb	st5	2R	FBgn0086677	0.00249353	0.403961	Dsim\GD25042	Scf_2R	0	1.59037	Dsec\GM20388	scaffold_1	0	0.625253	jeb-PA	2R	0	0.217073	Dyak\GE13477	2R	0.00566657	1.83963	Dyak\GE13477	2R	0	21.7488	Dere\GG22609	scaffold_4845	0	0.36111	Dana\GF12645	scaffold_13266	0	0	Dpse\GA15598	3	0	0.0184889	Dper\GL17386	dper_scaffold_4	0	0.0710744	FBpp0277899-D1_1	Muller-C	0.00242315	0.00663241	Dwil\GK21979	dwil_scf2_1100000004513	0	0.6861
Msi	st5	3L	FBgn0043025	0	0.381909	Dsim\GD12380	Scf_3L	0.0156085	0.0386673	Dsec\GM24310	scaffold_0	0.12837	0.306174	Msi-PA	3L	0.0132242	6.82971	Dyak\GE22123	3L	1.24931e-171	4.04029	Dyak\GE22123	3L	2.41323	40.7893	Dere\GG15785	scaffold_4784	0	0.0330895	Dana\GF23891	scaffold_13337	0	0	Dpse\GA16735	XR_group6	0	0.00702063	Dper\GL25219	dper_scaffold_9	0.00269065	0.00427999					Dwil\GK12326	dwil_scf2_1100000004830	0	0.291774
CG30495	st5	2R	FBgn0050495	0.0641886	0.967852	Dsim\GD10498	Scf_2R	0.104573	0.836154	Dsec\GM20969	scaffold_1	0.042226	3.44475	CG30495-PA	2R	1.16576e-21	0.217902	Dyak\GE19138	2L	1.77891e-10	2.31768	Dyak\GE19138	2L	1.00607e-06	1.09313	Dere\GG23292	scaffold_4929	0.0305989	0.170441	Dana\GF13189	scaffold_13266	0.0616088	2.52339	Dpse\GA15882	3	0.0114004	1.3258	Dper\GL20021	dper_scaffold_44	3.10906e-47	1.12178	FBpp0307511-D1_1	Muller-C	0	0.0942527	Dwil\GK18000	dwil_scf2_1100000004822	1.2723e-05	0.0223572
Picot	st5	2R	FBgn0024315	10.1472	0.40325	Dsim\GD25524	Scf_2R	13.4046	0.0830578	Dsec\GM20041	scaffold_1	18.782	0.535586	Picot-PB	2R	9.07172	0.132034	Dyak\GE14046	2R	26.122	4.82255	Dyak\GE14046	2R	19.0115	3.19575	Dere\GG22252	scaffold_4845	20.8156	0.227627	Dana\Picot	scaffold_13266	8.73578	0.0529368	Dpse\GA20823	3	6.11241	0.17437	Dper\GL11822	dper_scaffold_37	4.55821	0.300031	FBpp0278792-D1_1	Muller-C	4.92164	0.353455	Dwil\GK10727	dwil_scf2_1100000004382	15.8391	0.990925
Myo61F	st2	3L	FBgn0010246	0.934676	0.713441					Dsec\GM14400	scaffold_2	0.889384	0.708355	Myo61F-PD	3L	0.295604	0.563076	Dyak\GE21145	3L	3.21482	1.88147	Dyak\GE21145	3L	1.39192	0.095103	Dere\GG14781	scaffold_4784	1.13072	1.36551	Dana\GF24454	scaffold_13337	0.0366869	0	Dpse\GA21581	XR_group8	0.0918835	0.444104	Dper\GL16178	dper_scaffold_32	0.274008	0.202894	FBpp0286537-D1_1	Muller-AD	4.21103	1.42322	Dwil\GK13346	dwil_scf2_1100000004762	0.348806	0.010128
eys	st2	2L	FBgn0031414	0.00302216	0.0564614	Dsim\GD23147	Scf_2L	0	0.0241475	Dsec\GM18332	scaffold_5	7.33702	0.713389	eys-PC	2L	7.59321	1.84353	Dyak\GE18127	2L	3.21504	1.61924	Dyak\GE18127	2L	1.70357	0.33477	Dere\GG24848	scaffold_4929	0.00454323	1.26727	Dana\GF14619	scaffold_12916	0	0.00557016	Dpse\GA20207	4_group3	0.00365898	0.141019	Dper\GL18721	dper_scaffold_1	8.17848	0.92544	FBpp0280028-D1_1	Muller-B	0.00209983	0.047141	Dwil\GK15151	dwil_scf2_1100000004521	0.612364	0.218246
sing	st2	X	FBgn0261245	0.0197973	0.42524	Dsim\GD17295	Scf_X	0.32743	1.50048	Dsec\GM13456	scaffold_17	0.0544407	0.843152	sing-PA	X	0.102195	0.477132	Dyak\GE17611	X	1.18159	0.687904	Dyak\GE17611	X	1.0958	2.09954	Dere\GG19066	scaffold_4690	0.144979	1.61197	Dana\GF21837	scaffold_13334	0.23559	13.9527	Dpse\GA11974	XL_group1e	0	0.230196	Dper\GL13049	dper_scaffold_13	0.234089	1.19	FBpp0280569-D1_1	Muller-A	0.0671583	0.502157	Dwil\GK19928	dwil_scf2_1100000004515	0	0.0468446
Taf12L	st2	2L	FBgn0031623	0.26241	3.89279					Dsec\GM18077	scaffold_5	1.18213	7.73122	Taf12L-PA	2L	0.0638575	5.23196	Dyak\GE14689	2L	6.92074	11.2411	Dyak\GE14689	2L	1.0181	6.59621	Dere\GG24357	scaffold_4929	0.352464	4.54681	Dana\GF23906	scaffold_12943	0	0	Dpse\GA26102	4_group3	0.0740082	9.42176	Dper\GL15975	dper_scaffold_8	0.116402	2.24394	FBpp0280932-D1_1	Muller-B	0.188942	4.67937	Dwil\GK19084	dwil_scf2_1100000004516	0	0.418143
CG13646	st5	3R	FBgn0039255	0	0.0885074	Dsim\GD21153	Scf_3R	0	4.03827e-48	Dsec\GM26650	scaffold_0	0	0.209352	CG13646-PA	3R	0	0.189932	Dyak\GE23537	3R	0.0763786	1.56377	Dyak\GE23537	3R	0.373864	7.42955	Dere\GG11342	scaffold_4820	0.0242483	1.06362	Dana\GF16317	scaffold_13340	0.930766	1.75785	Dpse\GA12432	2	0	0.156469	Dper\GL24405	dper_scaffold_0	0.0830108	0.62779	FBpp0282247-D1_1	Muller-E	0	0.145082	Dwil\GK12978	dwil_scf2_1100000004943	0.00251707	0.0153446
CG8834	st5	2R	FBgn0033733	0	0.341604	Dsim\GD25843	Scf_2R	0	0.284925	Dsec\GM20363	scaffold_1	0	0.0937115	CG8834-PB	2R	0.01262	0.390318	Dyak\GE13451	2R	0.0064394	1.16205	Dyak\GE13451	2R	0	1.39152	Dere\GG22583	scaffold_4845	0	0.359913	Dana\GF12064	scaffold_13266	0.0186711	0.999628	Dpse\GA21356	3	0.00554726	0.366231	Dper\GL10440	dper_scaffold_2	0	0.0510988	FBpp0276601-D1_1	Muller-C	0	0.129469	Dwil\GK21395	dwil_scf2_1100000004513	0.00223188	0
CG43658	st5	X	FBgn0263706	9.38937	1.64431	Dsim\GD17354	Scf_X	13.1167	1.75507	Dsec\GM13312	scaffold_17	13.418	0.559487					Dyak\GE15589	X	10.5882	1.61105	Dyak\GE15589	X	11.9584	1.84357	Dere\GG18180	scaffold_4690	11.2591	1.26879	Dana\GF22612	scaffold_13248	8.84355	1.37864	Dpse\GA22567	XL_group1a	6.22115	0.998453	Dper\GL16418	dper_scaffold_15	26.2681	2.82803	FBpp0272594-D1_1	Muller-A	11.3584	0.809891	Dwil\GK19920	dwil_scf2_1100000004515	22.8345	3.42179
CG8136	st2	3R	FBgn0037616	0.0871752	0.261773	Dsim\GD18567	Scf_3R	7.90328e-162	3.88734e-39	Dsec\GM23756	scaffold_0	64.7393	100.702	CG8136-PB	3R	0.811127	0.530151	Dyak\GE25900	3R	22.8409	39.8968	Dyak\GE25900	3R	22.409	26.1546	Dere\GG12483	scaffold_4770	0.698505	6.88183	Dana\GF18184	scaffold_13340	0.0632233	1.79342	Dpse\GA27520	2	0.0238905	1.07942	Dper\GL12474	dper_scaffold_6	0.0425032	0.467001	FBpp0284774-D1_1	Muller-E	0	7.68041e-115	Dwil\GK11277	dwil_scf2_1100000004902	0	3.033e-169
ru	st5	3L	FBgn0003295	0	0.0511609	Dsim\GD13615	Scf_3L	0.0184871	0.109359	Dsec\GM14406	scaffold_2	0	0.477643	ru-PA	3L	0	0	Dyak\GE21150	3L	5.71372	12.0963	Dyak\GE21150	3L	0.0630416	2.67436	Dere\GG14787	scaffold_4784	0	0.0212632	Dana\GF24760	scaffold_13337	0.121226	0	Dpse\GA11431	XR_group3a	0	0.0176673	Dper\GL22503	dper_scaffold_23	6.35676e-08	0.0920516	FBpp0276919-D1_1	Muller-AD	0	0.0365441	Dwil\GK16979	dwil_scf2_1100000004511	0	0
CG14196	st2	X	FBgn0031002	0.0117781	0.696744	Dsim\GD15591	Scf_X	0	1.17517	Dsec\GM22756	scaffold_8	0	6.54685	CG14196-PA	X	0	0.267093	Dyak\GE17404	X	36.1163	1.87735	Dyak\GE17404	X	10.0037	13.4615	Dere\GG18069	scaffold_4690	0.00903619	0.341782	Dana\GF15997	scaffold_12903	3.01536	1.33996	Dpse\GA25845	XL_group1e	0	0.0136896	Dper\GL13011	dper_scaffold_13	0.0034926	0.605748					Dwil\GK19799	dwil_scf2_1100000004515	0.00641156	3.47792
CG14196	st5	X	FBgn0031002	0.0117781	0.696744	Dsim\GD15591	Scf_X	0	1.17517	Dsec\GM22756	scaffold_8	0	6.54685	CG14196-PA	X	0	0.267093	Dyak\GE17404	X	36.1163	1.87735	Dyak\GE17404	X	10.0037	13.4615	Dere\GG18069	scaffold_4690	0.00903619	0.341782	Dana\GF15997	scaffold_12903	3.01536	1.33996	Dpse\GA25845	XL_group1e	0	0.0136896	Dper\GL13011	dper_scaffold_13	0.0034926	0.605748					Dwil\GK19799	dwil_scf2_1100000004515	0.00641156	3.47792
CG1090	st5	3R	FBgn0037238	0.01121	1.22507	Dsim\GD19720	Scf_3R	0	1.11414	Dsec\GM10748	scaffold_6	0	1.61529	CG1090-PB	3R	0.0891949	1.41231	Dyak\GE25410	3R	0.0712903	2.62155	Dyak\GE25410	3R	0.411788	2.69058	Dere\GG12329	scaffold_4770	0	0.507165	Dana\GF18207	scaffold_13340	0.0170212	0.508409	Dpse\GA26275	2	0	0.0710546					FBpp0281341-D1_1	Muller-E	0	0.350879	Dwil\GK13526	dwil_scf2_1100000004943	0.00949311	0.0330988
CG10186	st2	2L	FBgn0032797	0.00849899	0.181196	Dsim\GD21751	Scf_2L	10.1868	11.4367	Dsec\GM17003	scaffold_7	10.4018	10.4798	CG10186-PE	2L	0	0.0376002	Dyak\GE12645	2R	2.75719	5.91792	Dyak\GE12645	2R	3.63584	3.87294	Dere\GG21625	scaffold_4845	0.0230706	0.228721	Dana\GF15627	scaffold_12916	0	0.100471	Dpse\GA10140	4_group1	0	0.459952	Dper\GL25683	dper_scaffold_5	0.00279078	0.737601	FBpp0279318-D1_1	Muller-B	0.0019606	0.157838	Dwil\GK14777	dwil_scf2_1100000004521	0.00349269	0.0104905
CG10186	st5	2L	FBgn0032797	0.00849899	0.181196	Dsim\GD21751	Scf_2L	10.1868	11.4367	Dsec\GM17003	scaffold_7	10.4018	10.4798	CG10186-PE	2L	0	0.0376002	Dyak\GE12645	2R	2.75719	5.91792	Dyak\GE12645	2R	3.63584	3.87294	Dere\GG21625	scaffold_4845	0.0230706	0.228721	Dana\GF15627	scaffold_12916	0	0.100471	Dpse\GA10140	4_group1	0	0.459952	Dper\GL25683	dper_scaffold_5	0.00279078	0.737601	FBpp0279318-D1_1	Muller-B	0.0019606	0.157838	Dwil\GK14777	dwil_scf2_1100000004521	0.00349269	0.0104905
v(2)k05816	st5	2L	FBgn0042627	0.00834799	0.612599									v(2)k05816-PA	2L	0.0050517	0.56617	Dyak\GE18209	2L	0.709432	2.01567	Dyak\GE18209	2L	0.166284	3.46689	Dere\GG24919	scaffold_4929	0.0123461	0.0789326	Dana\GF14400	scaffold_12916	0.237811	0.692763	Dpse\GA17498	4_group3	0	0.236841					FBpp0279844-D1_1	Muller-B	0.00282471	0.174865	Dwil\GK18430	dwil_scf2_1100000004945	0.0487984	0.0182982
Skeletor	st2	3R	FBgn0262717	0.0180733	0.593273	Dsim\GD18700	Scf_3R	0	0.598065	Dsec\GM23890	scaffold_0	0	0.788024	CG14681-PB	3R	0.0127424	2.55802	Dyak\GE26040	3R	21.7274	15.2842	Dyak\GE26040	3R	11.9236	11.3168	Dere\GG17606	scaffold_4770	0	0.0594196	Dana\GF17471	scaffold_13340	0	0	Dpse\GA17202	2	0.0329539	0.0815696	Dper\GL23703	dper_scaffold_0	0.0293286	0.428791	FBpp0282497-D1_1	Muller-E	0.00905371	0.0823872	Dwil\GK13233	dwil_scf2_1100000004943	0.0262171	0.0318161
Skeletor	st5	3R	FBgn0262717	0.0180733	0.593273	Dsim\GD18700	Scf_3R	0	0.598065	Dsec\GM23890	scaffold_0	0	0.788024	CG14681-PB	3R	0.0127424	2.55802	Dyak\GE26040	3R	21.7274	15.2842	Dyak\GE26040	3R	11.9236	11.3168	Dere\GG17606	scaffold_4770	0	0.0594196	Dana\GF17471	scaffold_13340	0	0	Dpse\GA17202	2	0.0329539	0.0815696	Dper\GL23703	dper_scaffold_0	0.0293286	0.428791	FBpp0282497-D1_1	Muller-E	0.00905371	0.0823872	Dwil\GK13233	dwil_scf2_1100000004943	0.0262171	0.0318161
serp	st2	3L	FBgn0260653	0	0.993475	Dsim\GD12255	Scf_3L	0.0196877	0.983656	Dsec\GM16620	scaffold_29	0	0.17519	serp-PB	3L	0	0.136909	Dyak\GE22470	3L	22.402	86.8977	Dyak\GE22470	3L	14.3537	69.3787	Dere\GG13377	scaffold_4784	0.0146106	0.972534	Dana\GF10715	scaffold_13337	0	0	Dpse\GA16758	XR_group8	0	0.0137319					FBpp0286068-D1_1	Muller-AD	0.00186602	0.00828849	Dwil\GK25738	dwil_scf2_1100000004762	0.0594837	0.0185813
serp	st5	3L	FBgn0260653	0	0.993475	Dsim\GD12255	Scf_3L	0.0196877	0.983656	Dsec\GM16620	scaffold_29	0	0.17519	serp-PB	3L	0	0.136909	Dyak\GE22470	3L	22.402	86.8977	Dyak\GE22470	3L	14.3537	69.3787	Dere\GG13377	scaffold_4784	0.0146106	0.972534	Dana\GF10715	scaffold_13337	0	0	Dpse\GA16758	XR_group8	0	0.0137319					FBpp0286068-D1_1	Muller-AD	0.00186602	0.00828849	Dwil\GK25738	dwil_scf2_1100000004762	0.0594837	0.0185813
Cbp53E	st5	2R	FBgn0004580	0.00763143	1.48284	Dsim\GD11237	Scf_2R	0	0.228752	Dsec\GM21744	scaffold_1	0	0.164648	Cbp53E-PA	2R	0	0.874605	Dyak\GE11635	2R	0	2.43574	Dyak\GE11635	2R	0	3.83898	Dere\GG20649	scaffold_4845	0	0.625726	Dana\GF11427	scaffold_13266	0.0178153	0.584316	Dpse\GA19795	3	0	0.00978937	Dper\GL11577	dper_scaffold_2	0.00502976	0	FBpp0277782-D1_1	Muller-C	0	0	Dwil\GK19573	dwil_scf2_1100000004512	0	0.00909997
CG1113	st2	3R	FBgn0037304	0.0154199	0.591874	Dsim\GD19770	Scf_3R	0.0964185	0.54906	Dsec\GM10796	scaffold_6	0.0588151	0.111431	CG1113-PA	3R	0.0470551	0.584895	Dyak\GE25456	3R	11.0989	7.26739	Dyak\GE25456	3R	8.07759	5.0047	Dere\GG12693	scaffold_4770	0.283414	0.907721	Dana\GF18930	scaffold_13340	11.3076	5.6569	Dpse\GA10779	2	0.226597	3.10025	Dper\GL21635	dper_scaffold_3	0.290161	3.28797	FBpp0281525-D1_1	Muller-E	0.0426818	0.770527	Dwil\GK12964	dwil_scf2_1100000004943	0.0166236	0.123069
Efhc1.1	st2	X	FBgn0030691	0.131881	3.20087	Dsim\GD15778	Scf_X	0.131302	1.28731	Dsec\GM22527	scaffold_37	0.0144344	0.663343	CG8959-PA	X	0.0820192	1.08527	Dyak\GE16021	X	11.2413	46.7222	Dyak\GE16021	X	13.4651	53.1749	Dere\GG19373	scaffold_4690	0.0678403	0.0461207	Dana\GF15903	scaffold_13111	0.102527	0.252													Dwil\GK25821	dwil_scf2_1100000004909	0.0564754	0.148927
Efhc1.1	st5	X	FBgn0030691	0.131881	3.20087	Dsim\GD15778	Scf_X	0.131302	1.28731	Dsec\GM22527	scaffold_37	0.0144344	0.663343	CG8959-PA	X	0.0820192	1.08527	Dyak\GE16021	X	11.2413	46.7222	Dyak\GE16021	X	13.4651	53.1749	Dere\GG19373	scaffold_4690	0.0678403	0.0461207	Dana\GF15903	scaffold_13111	0.102527	0.252													Dwil\GK25821	dwil_scf2_1100000004909	0.0564754	0.148927
Tsp42Ea	st5	2R	FBgn0029508	0.49998	0	Dsim\GD10441	Scf_2R	0.623809	0.724345	Dsec\GM20912	scaffold_1	2.51143	3.31554	Tsp42Ea-PA	2R	16.6977	0.995635	Dyak\GE19090	2L	6.27365	3.26055	Dyak\GE19090	2L	2.35537	2.30692	Dere\GG23240	scaffold_4929	0.308945	0.458091	Dana\GF13154	scaffold_13266	15.9901	1.03536	Dpse\GA15095	3	9.6564	2.47868	Dper\GL11133	dper_scaffold_2	10.274	0.952674					Dwil\GK21771	dwil_scf2_1100000004513	10.7487	1.67235
CG1674	st5	4	FBgn0039897	0.00906189	1.79292	Dsim\GD24401	Scf_4	0.0270362	1.03432	Dsec\GM26789	scaffold_30	0.00793363	0.955257	CG1674-PE	4	0.0525696	3.07836	Dyak\GE14542	4	0.0411476	6.35015	Dyak\GE14542	4	0.00646524	1.62068	Dere\GG16382	scaffold_4512	0	0.00609548					Dpse\GA14119	Unknown_group_62	0.0169674	0.187831	Dper\GL18162	dper_scaffold_42	0.00680352	0.561713					Dwil\GK13676	dwil_scf2_1100000004943	0.00271693	0.00372526
CG11619	st2	3L	FBgn0036836	0.026549	0.011613	Dsim\GD17913	Scf_3L	0.0146043	0.0903547	Dsec\GM14906	scaffold_19	0.13443	0.0990687	CG11619-PA	3L	0.00931852	0.124436	Dyak\GE22535	3L	2.02188	0.132188	Dyak\GE22535	3L	4.59851	0.0739277	Dere\GG13438	scaffold_4784	0.0363909	0.0171999	Dana\GF10793	scaffold_13337	0.770302	0.0554306	Dpse\GA11101	XR_group8	0.0128849	0.0500131	Dper\GL22006	dper_scaffold_36	0.0066052	0.169683	FBpp0286132-D1_1	Muller-AD	0.0209261	0.0994293	Dwil\GK12589	dwil_scf2_1100000004762	0.0022767	0.00506006
CG14321	st2	3R	FBgn0038540	0.0171546	23.2531	Dsim\GD19185	Scf_3R	0.0969261	7.04374	Dsec\GM15261	scaffold_12	0.0719442	20.4389	CG14321-PA	3R	0.0801957	20.8126	Dyak\GE25497	3R	29.2427	95.523	Dyak\GE25497	3R	1.68308	30.6282	Dere\GG22482	scaffold_4770	0	5.03034	Dana\GF16851	scaffold_13340	0	2.05679	Dpse\GA25146	3	28.3801	15.9903	Dper\GL11860	dper_scaffold_37	33.4459	27.7928	FBpp0278825-D1_1	Muller-C	39.5137	61.1788
NK7.1	st5	3R	FBgn0024321	0.165037	2.19157	Dsim\GD20427	Scf_3R	0.0758453	0.95298	Dsec\GM25858	scaffold_0	0.180947	1.87657	NK7.1-PA	3R	0.0167176	0.797276	Dyak\GE26456	3R	0.224481	1.31963	Dyak\GE26456	3R	0.0152694	3.06249	Dere\GG21357	scaffold_4770	0.0194581	1.52495	Dana\GF17487	scaffold_13340	0	0.0499041	Dpse\GA21136	2	0.127055	0.891841	Dper\GL24020	dper_scaffold_0	0.0562423	0.830249					Dwil\GK12153	dwil_scf2_1100000004902	0.0231003	0.186521
CG1571	st5	X	FBgn0029993	0	0.469988	Dsim\GD16876	Scf_X	0	0.130047					CG1571-PA	X	0	0.0938818	Dyak\GE15758	X	0.0339839	1.3119	Dyak\GE15758	X	0.0185889	1.27966	Dere\GG19683	scaffold_4690	0	0.709988	Dana\GF21298	scaffold_13117	0	0	Dpse\GA13906	XL_group1a	0	0.355238	Dper\GL26732	dper_scaffold_25	0.00379329	1.46236	FBpp0273503-D1_1	Muller-A	0.00327612	0.384198	Dwil\GK25656	dwil_scf2_1100000004909	0.0275262	0.454515
CG17994	st5	2R	FBgn0033072	0	0.644102	Dsim\GD10329	Scf_2R	0	0.314047	Dsec\GM16475	scaffold_26	0.094534	0.863717	CG17994-PA	2R	0	0.237718	Dyak\GE19421	2L	0	1.15113	Dyak\GE19421	2L	0.105816	3.19476	Dere\GG10826	scaffold_4929	1.28192e-19	2.76475e-05	Dana\GF13813	scaffold_13266	0	0.118787	Dpse\GA14757	3	0.635939	0.923933	Dper\GL16253	dper_scaffold_73	0	2.15971e-76	FBpp0275823-D1_1	Muller-C	1.31938e-292	1.88543e-118	Dwil\GK21985	dwil_scf2_1100000004513	0.156547	1.3558
CG14551	st5	3R	FBgn0039408	0	0.600354	Dsim\GD18146	Scf_3R	0	0.541489	Dsec\GM10196	scaffold_13	0	1.73506	CG14551-PA	3R	0.039628	0.779471	Dyak\GE10641	3R	42.9631	49.2508	Dyak\GE10641	3R	0	1.7504	Dere\GG12198	scaffold_4820	0	0.900226	Dana\GF16507	scaffold_13340	0	0.0787571	Dpse\GA13077	2	0	0.0122139	Dper\GL22010	dper_scaffold_3	0	0.100014	FBpp0284264-D1_1	Muller-E	0	0.580357	Dwil\GK12798	dwil_scf2_1100000004943	0.0404752	0.954949
CG7798	st5	2R	FBgn0034092	0.0257413	0.854229	Dsim\GD25558	Scf_2R	1.38367e-55	2.81701e-51	Dsec\GM20080	scaffold_1	0.0687923	0.15987	CG7798-PA	2R	0.139198	1.19963	Dyak\GE14087	2R	0.0736302	1.71075	Dyak\GE14087	2R	0.411499	12.3245	Dere\GG22291	scaffold_4845	2.78781e-92	1.83136e-49	Dana\GF12660	scaffold_13266	0	0	Dpse\GA20595	3	0	0.514412	Dper\GL16804	dper_scaffold_4	0	5.12639e-193	FBpp0276376-D1_1	Muller-C	0	0.188862
CG10737	st5	2R	FBgn0034420	10.2658	1.4955					Dsec\GM21936	scaffold_1	8.95454	0.965042	CG10737-PT	2R	6.04856	0.840705	Dyak\GE12023	2R	8.69139	2.95725	Dyak\GE12023	2R	9.26064	2.42382	Dere\GG21949	scaffold_4845	10.8305	1.10793	Dana\GF11576	scaffold_13266	2.88967	0.0270532					Dper\GL20970	dper_scaffold_1983	7.55818	4.69791					Dwil\GK17967	dwil_scf2_1100000004822	0.0410193	0.0228142
CG30008	st5	2R	FBgn0050008	0.00770904	0.141367	Dsim\GD10696	Scf_2R	0	0.234486	Dsec\GM21165	scaffold_1	0	0.208294	CG30008-PA	2R	0	0.058033	Dyak\GE19314	2L	0	4.06888	Dyak\GE19314	2L	0.0565565	9.46832	Dere\GG24117	scaffold_4929	0.0223771	0.372587	Dana\GF13296	scaffold_13266	0	0.0532844	Dpse\GA15573	3	0.0101151	0.501855	Dper\GL16761	dper_scaffold_4	0	0.385926	FBpp0276331-D1_1	Muller-C	2.05702	0.887182
nSyb	st5	3L	FBgn0013342	0.0105188	0.841742	Dsim\GD17610	Scf_3L	0.0105798	0.529062	Dsec\GM14195	scaffold_2	0	0.338583	n-syb-PE	3L	0	0.197526	Dyak\GE20941	3L	1.3694	6.20158	Dyak\GE20941	3L	0.0255721	1.38852	Dere\GG14581	scaffold_4784	0.0433014	0.0958555	Dana\GF24019	scaffold_13337	0	0	Dpse\GA28300	XR_group8	1.61932	3.49454	Dper\GL20732	dper_scaffold_29	0.938122	2.90507					Dwil\GK23666	dwil_scf2_1100000004837	0.0128669	0.118767
mos	st5	2R	FBgn0033773	51.6838	0.240506	Dsim\GD25816	Scf_2R	47.5808	0.679667	Dsec\GM20338	scaffold_1	74.5122	1.09709	mos-PA	2R	96.7581	2.48441e-238	Dyak\GE13424	2R	104.692	1.10249	Dyak\GE13424	2R	82.0481	3.24073	Dere\GG22554	scaffold_4845	59.3192	0.98388	Dana\GF13096	scaffold_13266	36.9566	1.8436	Dpse\GA21305	3	18.3651	7.21947e-06	Dper\GL17728	dper_scaffold_4	14.547	1.19528e-46					Dwil\GK21687	dwil_scf2_1100000004513	18.8984	0.563378
CG8353	st2	2L	FBgn0032002	0.966068	8.46663	Dsim\GD23516	Scf_2L	2.14645	1.27194	Dsec\GM16858	scaffold_3	0.00110995	3.57695	CG8353-PA	2L	0.446498	6.75343	Dyak\GE18746	2L	4.50352	2.10781	Dyak\GE18746	2L	4.33111	7.65	Dere\GG10526	scaffold_4929	0.719	1.60741	Dana\GF15274	scaffold_12916	1.41059	5.06657	Dpse\GA21012	4_group3	0.152237	2.26594	Dper\GL18730	dper_scaffold_1	1.77664	12.7922	FBpp0280037-D2_1	Muller-B	2.66573e-17	6.42758	Dwil\GK15159	dwil_scf2_1100000004521	0.53671	10.9577
CG13313	st5	3L	FBgn0035941	0.057093	0.070974	Dsim\GD14140	Scf_3L	0.086966	0.669286	Dsec\GM25105	scaffold_0	0.0395174	3.71455	CG13313-PA	3L	0.35832	2.03712	Dyak\GE20791	3L	0.813158	4.50686	Dyak\GE20791	3L	0.154663	1.21932	Dere\GG14360	scaffold_4784	0.0245259	0.434984	Dana\GF24366	scaffold_13337	0	0.1353	Dpse\GA12194	XR_group8	2.24844	6.71783	Dper\GL20729	dper_scaffold_29	5.50452	7.99885	FBpp0286247-D1_1	Muller-AD	4.49896	8.01948	Dwil\GK16749	dwil_scf2_1100000004511	0.00283801	0.463583
Gas8	st5	X	FBgn0029667	0	0.175604	Dsim\GD16327	Scf_X	0	0.011433	Dsec\GM12721	scaffold_4	0.106844	0.0298913	Gas8-PB	X	0.0239831	0.0290087	Dyak\GE16889	X	0.0461333	1.89624	Dyak\GE16889	X	0.331993	2.11269	Dere\GG18578	scaffold_4690	0.00779738	0.235647	Dana\GF22311	scaffold_13248	0	0	Dpse\GA12872	XL_group1e	0.00530683	0.0210462	Dper\GL15789	dper_scaffold_22	0	0	FBpp0273818-D1_1	Muller-A	0.276228	0.0853637	Dwil\GK16729	dwil_scf2_1100000004963	0.0867674	0.0102069
CG3394	st5	2R	FBgn0034999	17.4729	0.0241595	Dsim\GD11850	Scf_2R	62.5869	1.01435	Dsec\GM11851	scaffold_23	107.404	2.22434	CG3394-PA	2R	36.4657	0.435162	Dyak\GE14396	2R	80.7521	4.05179	Dyak\GE14396	2R	23.0276	7.45349	Dere\GG22959	scaffold_4845	26.1545	1.28645	Dana\GF11390	scaffold_13266	23.8268	0.389876	Dpse\GA24089	3	22.2994	0.358726	Dper\GL20024	dper_scaffold_34	29.9787	0.828073	FBpp0306375-D1_1	Muller-C	11.8937	0.810132	Dwil\GK22202	dwil_scf2_1100000004558	31.8338	0.440863
CG17681	st2	2L	FBgn0032668	0.0152347	1.57264	Dsim\GD24132	Scf_2L	0.570059	9.14647	Dsec\GM17267	scaffold_7	0.0172062	2.71853	CG17681-PA	2L	6.12893e-07	2.66096	Dyak\GE13182	2R	16.4958	28.2251	Dyak\GE13182	2R	12.4483	19.5576	Dere\GG21109	scaffold_4845	0.0987836	5.70437	Dana\GF14490	scaffold_12916	1.00443	0	Dpse\GA14610	4_group3	0.00734489	5.83985	Dper\GL18695	dper_scaffold_1	0.109776	1.59028	FBpp0279996-D1_1	Muller-B	0	0.248202	Dwil\GK15539	dwil_scf2_1100000004521	0.181488	0.0854784
CG16789	st2	3R	FBgn0037712	0.016858	2.7131	Dsim\GD18626	Scf_3R	0.0268321	1.38944	Dsec\GM23817	scaffold_0	0.0169664	1.48074	CG16789-PA	3R	1.05519	5.28573	Dyak\GE25963	3R	1.3262	1.65618	Dyak\GE25963	3R	1.57393	1.25631	Dere\GG16906	scaffold_4770	0.00930948	0.946789	Dana\GF18479	scaffold_13340	0.0970348	0.328246	Dpse\GA26300	2	0.298676	2.59019	Dper\GL21497	dper_scaffold_3	1.19829	4.08068					Dwil\GK11254	dwil_scf2_1100000004902	1.70038	4.5753
CG9406	st5	2R	FBgn0034592	0	0.405577	Dsim\GD11566	Scf_2R	0	0.326901	Dsec\GM15808	scaffold_9	0.0433329	0.309455	CG9406-PA	2R	2.32814e-07	0.0968051	Dyak\GE12170	2R	32.6982	64.681	Dyak\GE12170	2R	0	2.80849	Dere\GG22090	scaffold_4845	0.0700352	1.29689	Dana\GF12975	scaffold_13266	0	0.637854	Dpse\GA25097	3	0.325113	2.05787	Dper\GL10155	dper_scaffold_31	0.174802	0.965488					Dwil\GK20977	dwil_scf2_1100000004510	0	0.152884
p38a	st5	3R	FBgn0015765	20.0929	0.879392	Dsim\GD18318	Scf_3R	21.9056	0.349396	Dsec\GM23508	scaffold_0	29.1111	0.530981	Mpk2-PA	3R	41.0931	0.672207	Dyak\GE10824	3R	14.4654	2.41662	Dyak\GE10824	3R	19.6134	2.31207	Dere\GG12369	scaffold_4820	11.8843	0.705561	Dana\GF18893	scaffold_13340	6.32419	0.286891	Dpse\GA18909	2	18.856	6.43626	Dper\GL24141	dper_scaffold_0	20.0117	6.43593					Dwil\GK11930	dwil_scf2_1100000004902	31.5276	1.60654
trh	st5	3L	FBgn0262139	0.0471038	0.520723	Dsim\GD25707	Scf_3L	0.117027	0.207326	Dsec\trh	scaffold_2	0.0121791	0.105333	trh-PC	3L	0.0063812	0.109724	Dyak\GE21022	3L	0.154571	2.05138	Dyak\GE21022	3L	0.0097898	7.64805	Dere\GG14662	scaffold_4784	0	0.114916	Dana\GF24890	scaffold_13337	0.272309	0.42355	Dpse\GA19928	XR_group3a	0	0.831086	Dper\GL22602	dper_scaffold_23	0.0220717	1.97495	FBpp0277906-D1_1	Muller-AD	0.0135328	0.608676	Dwil\GK20151	dwil_scf2_1100000004540	0.0486825	0.0441283
CDase	st5	3R	FBgn0039774	0.00372861	2.38308	Dsim\GD21520	Scf_3R	0.0089021	0.658891	Dsec\GM12881	scaffold_4	0.00765046	0.66817	CDase-PB	3R	0	2.20902	Dyak\CDase	3R	0.00418965	6.09834	Dyak\CDase	3R	0	21.1911	Dere\GG11751	scaffold_4820	0	0.326904	Dana\GF22903	scaffold_12911	0.00833214	0.126305	Dpse\GA13191	2	0.0104369	0.0095897	Dper\GL13459	dper_scaffold_7	0	0.0212328	FBpp0282908-D1_1	Muller-E	0.0169897	0.0107623	Dwil\GK14135	dwil_scf2_1100000004943	0.0292764	0.0424615
CG6465	st5	3R	FBgn0037818	0.00512015	0.766311	Dsim\GD20716	Scf_3R	0.0112257	0.37017	Dsec\GM26165	scaffold_0	0	0.847348	CG6465-PA	3R	0	2.89423	Dyak\GE24682	3R	0.0047331	2.89134	Dyak\GE24682	3R	3.21809	33.657	Dere\GG17281	scaffold_4770	0	7.29885e-07	Dana\GF17518	scaffold_13340	0	0.289382													Dwil\GK22579	dwil_scf2_1100000004921	0	0.240098
CG3277	st5	2L	FBgn0031518	0.00441176	1.50581	Dsim\GD23218	Scf_2L	0.00882228	0.319047	Dsec\GM18404	scaffold_5	0.78137	0.510412	CG3277-PC	2L	0.11036	0.947233	Dyak\GE18220	2L	0.0677433	2.55401	Dyak\GE18220	2L	0.146285	2.57781	Dere\GG24928	scaffold_4929	0.606931	0.494579	Dana\GF14174	scaffold_12916	0.0455356	0.0299635	Dpse\GA17123	4_group3	0	0.616129	Dper\GL18602	dper_scaffold_1	0.0026294	0.980309	FBpp0279898-D1_1	Muller-B	0	0.220951	Dwil\GK18455	dwil_scf2_1100000004945	0.0224637	0.88226
conv	st2	2R	FBgn0261269	0.392805	11.9498	Dsim\GD11036	Scf_2R	0.942917	7.96435	Dsec\GM21526	scaffold_1	21.2107	8.15349					Dyak\GE13571	2R	11.5191	14.6206	Dyak\GE13571	2R	11.6666	20.5616	Dere\GG20440	scaffold_4845	0.628659	5.95947	Dana\GF13491	scaffold_13266	0.0105873	5.13828	Dpse\GA21164	3	2.84577	12.4561	Dper\GL10127	dper_scaffold_31	0.0449648	3.39025	FBpp0306327-D1_1	Muller-C	0.903694	6.84175	Dwil\GK20783	dwil_scf2_1100000004510	0.0117393	8.26037
CG33056	st5	3L	FBgn0053056	5.07581	0	Dsim\GD12136	Scf_3L	6.04349	0	Dsec\GM22160	scaffold_11	2.81392	0	CG33056-PA	3L	2.12772	0.0523426	Dyak\GE22958	v2_chr3L_random_028	7.84047	13.657	Dyak\GE22958	v2_chr3L_random_028	10.8105	26.8256	Dere\GG13255	scaffold_4784	7.6773	0.713392	Dana\GF10182	scaffold_13337	4.23418	0.0732015	Dpse\GA17253	XR_group6	4.28452	0.0301495	Dper\GL24600	dper_scaffold_33	14.2358	35.531	FBpp0274013-D1_1	Muller-AD	0.0597929	0.0207163	Dwil\GK17372	dwil_scf2_1100000004511	38.5071	63.7676
CG10005	st2	3R	FBgn0037972	0.72978	1.03152	Dsim\GD20617	Scf_3R	1.38681	0.201035	Dsec\GM26054	scaffold_0	0.949328	0.572716	CG10005-PA	3R	2.30317	1.30735	Dyak\GE24564	3R	19.1347	7.43933	Dyak\GE24564	3R	1.18759	0.560572	Dere\GG17174	scaffold_4770	0.677986	0.272548	Dana\GF23187	scaffold_12911	0.202108	0.856538	Dpse\GA10003	2	0.436219	3.18702	Dper\GL21589	dper_scaffold_3	0.0596209	3.47744	FBpp0281482-D1_1	Muller-E	1.47694	1.57838	Dwil\GK11672	dwil_scf2_1100000004902	0.237384	0.764347
CG13377	st2	X	FBgn0261446	0.0937845	1.34801	Dsim\GD16487	Scf_X	0.252979	2.61302	Dsec\GM19048	scaffold_10	0.207694	2.06507	CG13377-PA	X	0.506351	5.94186	Dyak\GE16595	X	15.4793	26.5167	Dyak\GE16595	X	4.79529	3.50134	Dere\GG12768	scaffold_4644	0.234974	0.41252	Dana\GF22179	scaffold_12929	0	0	Dpse\GA12240	XL_group1a	9.27965	3.4336	Dper\GL13353	dper_scaffold_26	28.93	9.95089	FBpp0273195-D1_1	Muller-A	39.4617	7.60326	Dwil\GK10120	dwil_scf2_1100000004909	0.032976	0.359086
CG10561	st5	2L	FBgn0002036	7.61628	0.397412	Dsim\GD24185	Scf_2L	7.79189	0.473494	Dsec\GM17327	scaffold_7	9.04261	0.441074	CG10561-PA	2L	8.50718	1.98227	Dyak\GE13233	2R	7.46668	4.55333	Dyak\GE13233	2R	10.673	3.98724	Dere\GG21160	scaffold_4845	6.61511	0.705003	Dana\GF14703	scaffold_12916	12.5577	0.933616	Dpse\GA10395	Unknown_group_454	9.09077	4.51367	Dper\GL21188	dper_scaffold_16	10.8992	4.82412	FBpp0272548-D1_1	Muller-B	15.4946	1.23325	Dwil\GK24793	dwil_scf2_1100000004585	9.48779	5.90775
CG33981	st2		FBgn0250851			Dsim\GD25437	Scf_2R	3.02407e-10	4.16027e-09	Dsec\GM19946	scaffold_1	0.503508	2.06603e-16	CG33981-PA	2R	2.53411	15.8952	Dyak\GE13958	2R	1.6598	2.02276	Dyak\GE13958	2R	4.36246	1.24173	Dere\GG21015	scaffold_4845	0.113711	0.000439004	Dana\GF13220	scaffold_13266	7.01483e-103	2.47999	Dpse\GA24158	3	1.42139	2.26435	Dper\GL17271	dper_scaffold_4	5.04881e-23	2.66761e-36	FBpp0275964-D1_1	Muller-C	5.35778	5.55596	Dwil\GK23305	dwil_scf2_1100000004954	7.08506e-39	1.1639e-106
CG30120	st2		FBgn0050120			Dsim\GD11386	Scf_2R	0.0476081	1.31243	Dsec\GM21889	scaffold_1	4.08831	10.0183	CG30120-PB	2R	0.0383492	1.32682	Dyak\GE11973	2R	2.9378	10.155	Dyak\GE11973	2R	2.96663	14.8173	Dere\GG21898	scaffold_4845	0.0691318	3.05931	Dana\GF11966	scaffold_13266	0.018796	1.11348	Dpse\GA15664	3	0.0184978	2.32114	Dper\GL17780	dper_scaffold_4	8.56745	26.5724	FBpp0278204-D1_1	Muller-C	0	1.34386	Dwil\GK23001	dwil_scf2_1100000004954	1.73341	8.10231
1 to 0
Rab3-GEF	st5	X	FBgn0030613	0.00419405	1.20096					Dsec\GM12059	scaffold_32	0.133314	13.5409	rab3-GEF-PB	X	0.053555	1.45198	Dyak\GE17167	X	0.00210991	0.351795	Dyak\GE17167	X	0	0.376841	Dere\GG17864	scaffold_4690	8.47913	1.79901	Dana\GF21221	scaffold_13117	0.00226996	0.0246179	Dpse\GA29335	Unknown_group_716	0.618654	0.923013	Dper\GL15180	dper_scaffold_28	51.1542	54.4943	FBpp0288359-D1_1	Muller-A	0.00627122	1.11056	Dwil\GK16189	dwil_scf2_1100000004590	0	0
CG13124	st5	2L	FBgn0032156	0.144884	6.86315					Dsec\GM12181	scaffold_3	6.45697	12.3994	CG13124-PA	2L	0	3.6567e-34	Dyak\GE10226	2L	0	0.116713	Dyak\GE10226	2L	0	0.510027	Dere\GG23999	scaffold_4929	0.0229389	6.67472	Dana\GF14154	scaffold_12916	0	2.12597	Dpse\GA12062	4_group3	0.00666977	0.137206	Dper\GL19202	dper_scaffold_1	0.00252527	4.74199					Dwil\GK18105	dwil_scf2_1100000004577	0.078118	0.458017
CG14356	st5	3R	FBgn0038207	0.0164595	1.32312	Dsim\GD20452	Scf_3R	0	0.222983	Dsec\GM25882	scaffold_0	1.29608	9.70284	CG14356-PA	3R	0.287319	3.92366	Dyak\GE10057	3R	0	0.703536	Dyak\GE10057	3R	0	0.210407	Dere\GG21470	scaffold_4770	0.0402821	1.22024	Dana\GF18786	scaffold_13340	0	0	Dpse\GA12930	2	0	0.191713	Dper\GL23306	dper_scaffold_0	0	0.255497					Dwil\GK10905	dwil_scf2_1100000004902	0	0
CG32795	st5	X	FBgn0040384	38.1316	0.613597	Dsim\GD16353	Scf_X	37.1133	2.25405	Dsec\GM18854	scaffold_10	62.3151	2.01836	CG32795-PA	X	23.7064	3.25774	Dyak\GE16919	X	52.172	0.908902	Dyak\GE16919	X	51.7278	1.50736	Dere\GG18605	scaffold_4690	42.7279	3.01954	Dana\GF22479	scaffold_13248	26.1601	10.0009	Dpse\GA27189	XL_group1e	57.0486	30.5585	Dper\GL19798	dper_scaffold_18	77.137	55.3606	FBpp0283818-D1_1	Muller-A	71.5596	95.4093	Dwil\GK25400	dwil_scf2_1100000004909	55.2337	1.33456
c(2)M	st2	2L	FBgn0028525	7.35682	1.70736	Dsim\GD24050	Scf_2L	2.34093	0.141894	Dsec\GM18665	scaffold_5	10.6822	0.277639	c(2)M-PA	2L	3.32969	0.285585	Dyak\GE21442	2L	0.973895	2.35169	Dyak\GE21442	2L	1.4868	0.891668	Dere\GG25201	scaffold_4929	23.3489	4.51347	Dana\GF14579	scaffold_12916	8.94368	0.93958	Dpse\GA18058	4_group2	36.9726	5.86686	Dper\GL16321	dper_scaffold_8	44.0536	12.1108
Tob	st5	X	FBgn0028397	12.8464	3.92702					Dsec\GM12980	scaffold_47	26.8147	1.97083	Tob-PA	X	8.68897	1.80447	Dyak\GE15993	X	13.6735	0.261363	Dyak\GE15993	X	2.24675	0.102667	Dere\GG19347	scaffold_4690	21.0993	4.40549					Dpse\GA21619	XL_group1e	18.5004	6.08548	Dper\GL15907	dper_scaffold_22	37.709	19.6925	FBpp0278855-D1_1	Muller-A	16.4216	5.6242	Dwil\GK10161	dwil_scf2_1100000004909	0.104144	0.0479326
Sec15	st5	3R	FBgn0266674	26.5417	9.10855	Dsim\GD20007	Scf_3R	22.2287	2.33725	Dsec\GM15101	scaffold_38	22.9723	2.10321	sec15-PA	3R	23.2407	2.45589	Dyak\GE25017	3R	51.7744	1.46655	Dyak\GE25017	3R	45.7335	0.560753	Dere\GG14883	scaffold_4770	32.0136	2.49044	Dana\GF18516	scaffold_13340	24.341	9.46503	Dpse\GA20047	2	14.1827	0.48192	Dper\GL22033	dper_scaffold_3	14.2893	0.766084	FBpp0284287-D1_1	Muller-E	21.8907	0.169984	Dwil\GK13077	dwil_scf2_1100000004943	17.3985	4.29951
CG16886	st5	2L	FBgn0028938	0	1.32386					Dsec\GM15040	scaffold_3	0	3.62754	CG16886-PA	2L	0	1.03177	Dyak\GE25289	2L	0	0.33108	Dyak\GE25289	2L	0	0.352597	Dere\GG10173	scaffold_4929	0	1.80903	Dana\GF15611	scaffold_12916	0	0.427181	Dpse\GA29060	4_group4	0.00681116	2.37545	Dper\GL21071	dper_scaffold_16	0	6.06715					Dwil\GK15114	dwil_scf2_1100000004521	0	0.0629038
CG11779	st5	3R	FBgn0038683	30.9212	8.47243					Dsec\GM10044	scaffold_25	19.8602	2.47927	CG11779-PA	3R	26.8518	16.5797	Dyak\GE25149	3R	19.3214	0.998455	Dyak\GE25149	3R	18.902	0.341625	Dere\GG16152	scaffold_4770	35.2688	18.6902	Dana\GF18940	scaffold_13340	56.6687	16.7305	Dpse\GA11194	2	47.8374	15.7256	Dper\GL23705	dper_scaffold_0	61.2716	18.2382	FBpp0292577-D1_1	Muller-E	46.0606	9.58295	Dwil\GK13236	dwil_scf2_1100000004943	26.6591	9.20279
krimp	st5	2R	FBgn0034098	68.7626	3.44326	Dsim\GD15225	Scf_2R	50.5981	11.3715	Dsec\GM20076	scaffold_1	56.4332	41.7993	krimp-PA	2R	40.3214	2.33672	Dyak\GE14084	2R	30.1286	0.675936	Dyak\GE14084	2R	25.5798	0.525477	Dere\GG22288	scaffold_4845	25.1311	2.38838	Dana\GF12657	scaffold_13266	30.6625	1.10288													Dwil\GK20979	dwil_scf2_1100000004510	36.207	20.307
CG17272	st5	3R	FBgn0038830	44.2573	28.6838	Dsim\GD20030	Scf_3R	32.132	57.9386	Dsec\GM23155	scaffold_27	64.6091	91.4362	CG17272-PA	3R	68.5018	20.6249	Dyak\GE25035	3R	2.26861	0.860858	Dyak\GE25035	3R	4.22169	0.61846	Dere\GG15104	scaffold_4770	13.8818	47.4117	Dana\GF17013	scaffold_13340	11.8348	6.80875	Dpse\GA14430	2	42.1181	45.4866	Dper\GL24278	dper_scaffold_0	0.14667	8.49329e-138	FBpp0300210-D1_1	Muller-E	19.1204	83.9616	Dwil\GK22694	dwil_scf2_1100000004921	8.83097	2.47605
nod	st2	X	FBgn0002948	54.079	5.91929	Dsim\GD17032	Scf_X	54.4146	1.87623	Dsec\GM13095	scaffold_36	38.8673	6.82093	nod-PA	X	64.853	2.14784	Dyak\GE15949	X	0.330838	0.580798	Dyak\GE15949	X	1.73079e-98	8.37838e-38	Dere\GG18431	scaffold_4690	84.7578	19.5394	Dana\GF22525	scaffold_13248	6.29028	5.41676	Dpse\GA14585	XL_group3a	26.6756	17.3406	Dper\GL26998	dper_scaffold_39	43.1957	37.3473	FBpp0272202-D1_1	Muller-A	29.2323	9.50214	Dwil\GK25234	dwil_scf2_1100000004909	37.9408	8.79791
nod	st5	X	FBgn0002948	54.079	5.91929	Dsim\GD17032	Scf_X	54.4146	1.87623	Dsec\GM13095	scaffold_36	38.8673	6.82093	nod-PA	X	64.853	2.14784	Dyak\GE15949	X	0.330838	0.580798	Dyak\GE15949	X	1.73079e-98	8.37838e-38	Dere\GG18431	scaffold_4690	84.7578	19.5394	Dana\GF22525	scaffold_13248	6.29028	5.41676	Dpse\GA14585	XL_group3a	26.6756	17.3406	Dper\GL26998	dper_scaffold_39	43.1957	37.3473	FBpp0272202-D1_1	Muller-A	29.2323	9.50214	Dwil\GK25234	dwil_scf2_1100000004909	37.9408	8.79791
Mal-B2	st5	2L	FBgn0032382	10.5759	43.6483	Dsim\Mal-B2	Scf_2L	8.58397	24.9912	Dsec\Mal-B2	scaffold_16	6.2849	19.4159	CG14935-PA	2L	2.57506	7.61242	Dyak\Mal-B2	2L	6.99005	0.389434	Dyak\Mal-B2	2L	3.02564	0.0237575	Dere\Mal-B2	scaffold_4929	15.6658	40.6207	Dana\Mal-B2	scaffold_12943	11.1526	18.516	Dpse\Mal-B2	4_group3	20.5279	10.4158	Dper\Mal-B2	dper_scaffold_8	18.9548	4.92513	FBpp0280821-D1_1	Muller-B	14.3532	9.37734	Dwil\Mal-B2	dwil_scf2_1100000004521	6.26003	24.5383
CG9153	st5	3L	FBgn0035207	22.7191	7.9407	Dsim\GD13608	Scf_3L	28.5365	3.16667	Dsec\GM14399	scaffold_2	32.6543	5.93026	CG9153-PB	3L	41.8091	4.60858	Dyak\GE21143	3L	31.4865	1.23337	Dyak\GE21143	3L	28.3431	0.877551	Dere\GG14780	scaffold_4784	23.6748	3.89603	Dana\GF24453	scaffold_13337	37.8828	29.7611	Dpse\GA28417	XR_group8	19.8038	6.14394	Dper\GL16177	dper_scaffold_32	30.044	8.23897					Dwil\GK20388	dwil_scf2_1100000004768	23.3874	7.03566
l(2)gd1	st5	2L	FBgn0261983	17.6406	4.55984	Dsim\GD23762	Scf_2L	21.0612	12.3255	Dsec\GM18896	scaffold_3	30.0688	17.6465	l(2)gd1-PA	2L	27.0933	13.1766	Dyak\GE18513	2L	24.3825	1.66193	Dyak\GE18513	2L	25.7659	0.907963	Dere\GG23706	scaffold_4929	23.0493	1.8406	Dana\GF15641	scaffold_12916	13.8037	14.9281	Dpse\GA18377	4_group3	15.0629	16.8182	Dper\GL19542	dper_scaffold_1	25.4438	28.4163	FBpp0280670-D1_1	Muller-B	11.3364	10.3696
kat80	st5	X	FBgn0040207	21.9798	5.30539					Dsec\GM12969	scaffold_47	23.7356	4.39391	kat80-PB	X	21.6977	9.76443	Dyak\GE15982	X	22.1508	0.529	Dyak\GE15982	X	19.2941	0.678567	Dere\GG19338	scaffold_4690	21.0253	5.92106	Dana\GF19640	scaffold_13137	28.8728	12.9701	Dpse\GA24804	XL_group1e	32.6298	7.46683					FBpp0277872-D1_1	Muller-A	35.8954	6.83589	Dwil\GK25250	dwil_scf2_1100000004909	23.6477	3.71568
Gr59f	st5	2R	FBgn0041234	0.0229314	23.3647	Dsim\GD11772	Scf_2R	2.38254e-69	4.0149	Dsec\GM16022	scaffold_9	0	2.06886	Gr59f-PA	2R	0	1.40808	Dyak\GE14299	2R	0	0.0934319	Dyak\GE14299	2R	0	0.0965326	Dere\GG22863	scaffold_4845	8.73923	7.31455	Dana\GF13061	scaffold_13266	0	0	Dpse\Gr59f	3	3.14818	4.33734	Dper\GL16865	dper_scaffold_4	0.0136716	1.98883					Dwil\GK23189	dwil_scf2_1100000004954	0	0.536456
Surf1	st5	3L	FBgn0029117	15.6544	1.59943	Dsim\GD13981	Scf_3L	8.70959	0.745606	Dsec\GM14809	scaffold_2	16.4052	2.27995	Surf1-PA	3L	11.1404	4.46887	Dyak\GE21584	3L	11.906	0.721928	Dyak\GE21584	3L	11.2854	1.47689	Dere\GG14394	scaffold_4784	25.5286	3.40282	Dana\GF23555	scaffold_13337	18.7511	19.5494	Dpse\GA22142	XR_group5	18.3305	12.3797	Dper\GL15049	dper_scaffold_67	19.1843	15.4812	FBpp0288339-D1_1	Muller-AD	25.4844	18.9014	Dwil\GK16990	dwil_scf2_1100000004511	15.3948	33.1417
png	st5	X	FBgn0000826	39.3669	3.19954	Dsim\GD16426	Scf_X	84.1735	1.45692					png-PA	X	54.4241	4.42204	Dyak\GE16532	X	47.3093	0.478472	Dyak\GE16532	X	33.8224	0.727832	Dere\GG12703	scaffold_4644	10.0583	2.59422	Dana\GF21264	scaffold_13117	42.6217	0.584052	Dpse\GA10994	XL_group1a	26.9581	0.755958	Dper\GL14384	dper_scaffold_11	73.6261	31.3717	FBpp0273432-D1_1	Muller-AD	48.3993	1.48404	Dwil\GK16236	dwil_scf2_1100000004590	71.7143	9.68572
RhoGAP5A	st5	X	FBgn0029778	13.018	30.5549	Dsim\GD16254	Scf_X	11.191	16.49	Dsec\GM12638	scaffold_4	12.8172	40.2854	RhoGAP5A-PA	X	10.0454	21.3076	Dyak\GE16808	X	13.583	0.715509	Dyak\GE16808	X	11.8955	0.397856	Dere\GG18490	scaffold_4690	16.5985	1.69291	Dana\GF21287	scaffold_13117	25.1771	1.45454	Dpse\GA16662	XL_group1a	7.26186	1.25567					FBpp0272640-D1_1	Muller-A	20.4786	3.30973	Dwil\GK24959	dwil_scf2_1100000004909	71.2418	0.447431
bam	st5	3R	FBgn0000158	22.7284	1.62549	Dsim\bam	Scf_3R	71.9384	35.2189	Dsec\GM17739	scaffold_33	31.7993	2.9347	bam-PA	3R	50.7986	11.4981	Dyak\bam	3R	11.0598	0.305162	Dyak\bam	3R	17.6416	0.0562408	Dere\bam	scaffold_4820	20.4842	2.85761	Dana\GF17434	scaffold_13340	25.2231	197.141	Dpse\GA10309	2	64.729	0.991727	Dper\GL12616	dper_scaffold_6	52.9767	19.7495	FBpp0284914-D1_1	Muller-E	13.7071	4.71804	Dwil\GK13839	dwil_scf2_1100000004943	0.150114	0.254678
CG15536	st2	3R	FBgn0039766	18.1976	31.6939	Dsim\GD17112	Scf_3R	3.66592	0.943025	Dsec\GM12159	scaffold_4	1.81996e-18	2.35011e-22	CG15536-PA	3R	17.7758	16.807	Dyak\GE23391	3R	1.83651e-86	4.97417e-43	Dyak\GE23391	3R	1.04171e-10	2.01389e-06	Dere\GG11939	scaffold_4820	13.3179	23.888	Dana\GF16183	scaffold_13340	1.04499	22.0421	Dpse\GA13794	2	5.68225	2.177	Dper\GL14052	dper_scaffold_7	10.0703	2.12077	FBpp0293092-D1_1	Muller-E	15.1141	5.20615	Dwil\GK13132	dwil_scf2_1100000004943	26.7206	12.8731
CG15536	st5	3R	FBgn0039766	18.1976	31.6939	Dsim\GD17112	Scf_3R	3.66592	0.943025	Dsec\GM12159	scaffold_4	1.81996e-18	2.35011e-22	CG15536-PA	3R	17.7758	16.807	Dyak\GE23391	3R	1.83651e-86	4.97417e-43	Dyak\GE23391	3R	1.04171e-10	2.01389e-06	Dere\GG11939	scaffold_4820	13.3179	23.888	Dana\GF16183	scaffold_13340	1.04499	22.0421	Dpse\GA13794	2	5.68225	2.177	Dper\GL14052	dper_scaffold_7	10.0703	2.12077	FBpp0293092-D1_1	Muller-E	15.1141	5.20615	Dwil\GK13132	dwil_scf2_1100000004943	26.7206	12.8731
CG5390	st5	2L	FBgn0032213	0.475513	0.542665	Dsim\GD22278	Scf_2L	0.932256	1.52277	Dsec\GM11791	scaffold_3	1.91554	5.16799					Dyak\GE26141	2L	0.543642	1.09453	Dyak\GE26141	2L	0.238957	0.95247	Dere\GG23951	scaffold_4929	0.0607721	3.46536	Dana\GF14116	scaffold_12916	1.72258	4.66012					Dper\GL18967	dper_scaffold_1	0.755907	4.37144					Dwil\GK12466	dwil_scf2_1100000004936	0.10308	0.168361
Irp-1A	st2	3R	FBgn0024958	10.09	33.7645	Dsim\GD18433	Scf_3R	20.2394	46.3202	Dsec\GM23623	scaffold_0	23.5178	57.4319	Irp-1A-PA	3R	13.108	42.021	Dyak\GE24011	3R	1.00238	7.57995	Dyak\GE24011	3R	0.879302	0.241483	Dere\GG12491	scaffold_4820	17.5392	49.3545	Dana\GF18293	scaffold_13340	10.3565	12.0464	Dpse\GA18513	2	8.05945	38.0138	Dper\GL23781	dper_scaffold_0	10.8632	53.4881					Dwil\GK11469	dwil_scf2_1100000004902	23.8517	65.1554
Wnt5	st2	X	FBgn0010194	6.95744	9.91685	Dsim\GD15629	Scf_X	2.92204	14.6424	Dsec\GM22805	scaffold_8	2.11545	19.1798	Wnt5-PA	X	7.61192	10.8527	Dyak\GE15518	X	0.537269	6.32348	Dyak\GE15518	X	0.149183	13.3364	Dere\GG18113	scaffold_4690	8.19398	48.8354	Dana\GF13958	scaffold_13339	14.0551	0.995452	Dpse\GA19569	Unknown_group_295	19.1155	19.1096									Dwil\GK21945	dwil_scf2_1100000004513	0.0215276	23.6338
CG4908	st2	2L	FBgn0032195	13.2236	19.0129	Dsim\GD23665	Scf_2L	21.0195	23.4881	Dsec\GM18016	scaffold_3	16.1812	20.8521	CG4908-PB	2L	15.1752	21.2008	Dyak\GE18907	2L	0.779171	4.48777	Dyak\GE18907	2L	0.861367	0.928435	Dere\GG10093	scaffold_4929	4.07301	0.211338	Dana\GF15752	scaffold_12916	6.20039	68.3213	Dpse\GA18516	4_group2	43.5391	28.2383	Dper\GL19152	dper_scaffold_1	45.1285	37.872	FBpp0285254-D1_1	Muller-B	62.1881	21.1231
mav	st2	4	FBgn0039914	21.0233	86.3184	Dsim\GD15474	Scf_4	43.4749	36.289	Dsec\GM26775	scaffold_30	25.0134	97.156	mav-PA	4	24.2445	68.6493	Dyak\GE14508	4	0.0339882	3.35699	Dyak\GE14508	4	0.258369	2.1548	Dere\GG16441	scaffold_4512	2.48031	6.27296	Dana\GF12294	scaffold_13499	2.08068	11.302	Dpse\GA15119	Unknown_group_497	0.150127	1.31993	Dper\GL18182	dper_scaffold_42	4.66193e-161	0.000217797	FBpp0285055-D1_1	Muller-F	0.0147813	0.753014	Dwil\GK13699	dwil_scf2_1100000004943	10.2206	21.2359
CG32599	st5	X	FBgn0260482	0.00554708	2.64746					Dsec\GM17666	scaffold_20	0	4.79487	CG32599-PA	X	0	6.96658	Dyak\GE17130	X	0	0.0954618	Dyak\GE17130	X	0	0.0906094	Dere\GG17838	scaffold_4690	0.110704	1.24105	Dana\GF22390	scaffold_13248	0	1.56959	Dpse\GA17016	XL_group1e	0.101785	14.6346	Dper\GL14925	dper_scaffold_21	0.669502	22.6369	FBpp0282194-D1_1	Muller-A	1.48425	11.159	Dwil\GK20154	dwil_scf2_1100000004515	0.0210894	0.0126711
Acox57D-p	st5	2R	FBgn0034628	34.3613	6.36463	Dsim\GD11593	Scf_2R	43.1365	1.68039	Dsec\GM15834	scaffold_9	97.6575	1.92794	Acox57D-p-PA	2R	116.918	2.54098	Dyak\GE12194	2R	107.049	2.55759	Dyak\GE12194	2R	81.2405	0.825317	Dere\GG22112	scaffold_4845	4.0259	1.46334					Dpse\GA21980	3	6.22792	2.52459	Dper\GL11770	dper_scaffold_37	5.15554	1.10389	FBpp0275733-D1_1	Muller-C	5.69198	0.835063	Dwil\GK20899	dwil_scf2_1100000004510	8.90039	0.107588
GstO2	st2	3L	FBgn0035906	117.548	392.393	Dsim\GD12980	Scf_3L	118.997	399.509	Dsec\GM24932	scaffold_0	3.91173	17.4876	CG6673-PA	3L	144.439	476.046	Dyak\GE21298	3L	0.53652	16.9351	Dyak\GE21298	3L	2.42327e-295	4.77436e-229	Dere\GG15075	scaffold_4784	11.667	51.9598	Dana\GF10161	scaffold_13337	2.10959	14.7936	Dpse\GA23449	XR_group6	9.98855	33.9153	Dper\GL15567	dper_scaffold_35	1.33622	24.833	FBpp0274247-D2_1	Muller-AD	27.9039	99.8788	Dwil\GK20540	dwil_scf2_1100000004768	4.72603e-08	4.02449
Fur2	st5	X	FBgn0004598	68.9111	1.91272	Dsim\Fur2	Scf_X	67.7472	3.12173					Fur2-PB	X	76.1815	2.32494	Dyak\Fur2	X	63.0775	1.59227	Dyak\Fur2	X	75.5071	1.64395	Dere\Fur2	scaffold_4690	79.6275	4.04047	Dana\GF19273	scaffold_13137	62.5862	9.24445	Dpse\GA15057	XL_group1e	72.1955	6.7367	Dper\GL15836	dper_scaffold_22	190.76	16.2496	FBpp0274210-D1_1	Muller-A	63.7224	17.3249	Dwil\GK25063	dwil_scf2_1100000004909	79.7777	7.09907
CG43759	st2	X	FBgn0264090	6.08042	3.95294	Dsim\GD24866	Scf_X	7.22222	3.44867	Dsec\GM22935	scaffold_8	1.16086e-18	2.08808e-24	CG42506-PA	X	16.2125	3.24275	Dyak\GE17765	X	6.8492e-26	7.21681e-13	Dyak\GE17765	X	5.54969e-06	1.21285e-27	Dere\GG19202	scaffold_4690	4.75152	4.3968	Dana\GF19250	scaffold_13047	3.62464	2.45951	Dpse\GA16975	XL_group1e	3.29319	2.74076	Dper\GL14665	dper_scaffold_14	7.65445	6.31621					Dwil\GK25842	dwil_scf2_1100000004909	23.799	18.3369
CG43759	st5	X	FBgn0264090	6.08042	3.95294	Dsim\GD24866	Scf_X	7.22222	3.44867	Dsec\GM22935	scaffold_8	1.16086e-18	2.08808e-24	CG42506-PA	X	16.2125	3.24275	Dyak\GE17765	X	6.8492e-26	7.21681e-13	Dyak\GE17765	X	5.54969e-06	1.21285e-27	Dere\GG19202	scaffold_4690	4.75152	4.3968	Dana\GF19250	scaffold_13047	3.62464	2.45951	Dpse\GA16975	XL_group1e	3.29319	2.74076	Dper\GL14665	dper_scaffold_14	7.65445	6.31621					Dwil\GK25842	dwil_scf2_1100000004909	23.799	18.3369
CG15629	st2	2L	FBgn0031630	0.100178	18.4081	Dsim\GD23300	Scf_2L	4.26962	14.0916	Dsec\GM18492	scaffold_5	3.59471	10.9303	CG15629-PA	2L	2.68532	16.1142	Dyak\GE18307	2L	0.288204	24.3473	Dyak\GE18307	2L	0.304212	29.4301	Dere\GG25019	scaffold_4929	1.85277	26.0192	Dana\GF15490	scaffold_12916	2.97316	9.07142	Dpse\GA13859	4_group3	0.839587	4.80341	Dper\GL19368	dper_scaffold_1	2.08896	4.38842	FBpp0280491-D1_1	Muller-B	1.22814	3.48623	Dwil\GK24179	dwil_scf2_1100000004585	2.14508	6.81162
CG4061	st5	X	FBgn0025630	4.72872	2.95003	Dsim\GD16584	Scf_X	6.67158	5.73059	Dsec\GM19193	scaffold_10	11.2027	8.73064	CG4061-PA	X	34.9773	6.16431	Dyak\GE16231	X	5.13387	0.515025	Dyak\GE16231	X	3.44153	0.120694	Dere\GG12902	scaffold_4644	11.7679	3.96946	Dana\GF22226	scaffold_12929	11.3268	8.21894	Dpse\GA17926	XL_group1e	12.4639	0.141428	Dper\GL18225	dper_scaffold_30	21.8189	0.655261	FBpp0285355-D1_1	Muller-A	13.7004	0.474293	Dwil\GK16447	dwil_scf2_1100000004590	10.7572	3.61542
Oseg1	st5	3L	FBgn0265102	12.0942	2.48228	Dsim\GD12991	Scf_3L	12.5236	0.85037	Dsec\GM24940	scaffold_0	10.4178	1.21781	Oseg1-PA	3L	10.8438	1.96993	Dyak\GE21307	3L	14.5535	0.944397	Dyak\GE21307	3L	15.3463	0.356791	Dere\GG15084	scaffold_4784	8.54932	9.96286	Dana\GF10109	scaffold_13337	6.07548	4.37648	Dpse\GA20145	XR_group6	10.3231	5.79977	Dper\GL24573	dper_scaffold_33	14.3901	1.59991	FBpp0273987-D1_1	Muller-AD	12.519	1.65846	Dwil\GK11966	dwil_scf2_1100000004762	8.97475	4.72685
wit	st2	3L	FBgn0024179	0.45697	2.43682	Dsim\GD13298	Scf_3L	11.0732	6.72561	Dsec\GM14019	scaffold_2	7.4819	0.0828888	wit-PA	3L	10.3168	1.0243	Dyak\GE20653	3L	0.669524	1.98076	Dyak\GE20653	3L	0.683071	0.441296	Dere\GG14225	scaffold_4784	4.61115	2.91216	Dana\GF24409	scaffold_13337	2.74729	0.27205	Dpse\GA10555	XR_group6	4.71944	0.141683	Dper\GL16800	dper_scaffold_82	7.43037	0.121347	FBpp0275207-D1_1	Muller-AD	3.00478	0.1924	Dwil\GK18023	dwil_scf2_1100000004822	25.7675	3.77599
CG9531	st5	2L	FBgn0031817	10.4358	2.28501	Dsim\GD22575	Scf_2L	9.00807	3.66351	Dsec\GM17937	scaffold_5	12.0507	2.01273	CG9531-PA	2L	5.91642	2.87751	Dyak\GE18440	2L	6.23883	0.237515	Dyak\GE18440	2L	9.21361	0.125497	Dere\GG23621	scaffold_4929	14.3652	5.00938	Dana\GF23689	scaffold_12943	28.3702	2.86153	Dpse\GA21859	4_group1	23.9659	6.9796	Dper\GL26107	dper_scaffold_5	29.6866	10.6258					Dwil\GK18695	dwil_scf2_1100000004884	9.14996	19.2618
Ilp6	st5	X	FBgn0044047	0.348783	1.08289					Dsec\GM18888	scaffold_10	0.284377	0.950653	Ilp6-PA	X	0	1.62426	Dyak\GE10998	v2_chrX_random_010	0	0.180054	Dyak\GE10998	v2_chrX_random_010	0	0.895388	Dere\GG12622	scaffold_4644	0.160796	1.49328	Dana\GF21959	scaffold_12929	8.62793	6.74707	Dpse\GA22847	XL_group1a	0.457559	0.835301	Dper\GL13378	dper_scaffold_26	0.0226608	0.35357	FBpp0273136-D1_1	Muller-A	0.089643	0	Dwil\GK10295	dwil_scf2_1100000004401	0.0534736	0.0779901
veil	st5	2R	FBgn0034225	0.00840156	35.6786	Dsim\GD11273	Scf_2R	0	49.2286	Dsec\GM21781	scaffold_1	0.0148227	117.01	veil-PA	2R	0.0430446	47.2981	Dyak\GE11669	2R	0.0078836	0.0722584	Dyak\GE11669	2R	0	0.0582259	Dere\GG20685	scaffold_4845	0.0137105	87.0589	Dana\GF13125	scaffold_13266	0	67.1011	Dpse\GA18461	3	0.0241397	20.7396					FBpp0277624-D1_1	Muller-C	0.0223616	48.3379	Dwil\GK22902	dwil_scf2_1100000004954	0	27.9762
CG14516	st5	3R	FBgn0039640	99.9252	0.48155	Dsim\GD21419	Scf_3R	104.295	1.81705	Dsec\GM12769	scaffold_4	168.442	3.63415	CG14516-PB	3R	201.363	4.0288	Dyak\GE23837	3R	147.311	0.796203	Dyak\GE23837	3R	130.195	2.16837	Dere\GG11647	scaffold_4820	106.454	2.55317	Dana\GF23291	scaffold_12911	48.9276	2.35454	Dpse\GA27104	2	112.668	2.0914	Dper\GL23913	dper_scaffold_0	175.51	2.11901	FBpp0283606-D1_1	Muller-E	124.876	222.873	Dwil\GK11892	dwil_scf2_1100000004902	71.3131	1.9015
CG15356	st5	2L	FBgn0031377	23.3075	4.61851	Dsim\GD22882	Scf_2L	22.5299	1.44615	Dsec\GM16578	scaffold_14	72.6296	0.763116	CG15356-PA	2L	20.5028	1.33984	Dyak\GE15283	2L	22.8208	1.67375	Dyak\GE15283	2L	19.5978	1.52991	Dere\GG24565	scaffold_4929	18.3535	3.08451	Dana\GF15314	scaffold_12916	23.8807	1.86546	Dpse\GA13668	4_group3	15.2228	2.17523	Dper\GL18460	dper_scaffold_1	34.5231	3.76644	FBpp0279745-D1_1	Muller-B	14.4494	2.71624	Dwil\GK24815	dwil_scf2_1100000004585	30.1748	3.95885
btn	st5	3R	FBgn0014949	0.235826	3.24009	Dsim\GD18444	Scf_3R	0.409058	1.59779	Dsec\GM23634	scaffold_0	0.470266	4.39934	btn-PA	3R	0.95972	1.51391	Dyak\GE24022	3R	0.028406	0.238709	Dyak\GE24022	3R	1.01914	1.16093	Dere\GG12502	scaffold_4820	0.230932	3.16444	Dana\GF16143	scaffold_13340	0	0	Dpse\GA18771	2	0.022245	0.632741	Dper\GL13677	dper_scaffold_7	0.0276514	0.171045	FBpp0283269-D1_1	Muller-E	0	0.760631	Dwil\GK11783	dwil_scf2_1100000004902	1.04696	2.47061
CG13409	st2	3R	FBgn0038926	3.34446	14.8214	Dsim\GD18481	Scf_3R	0.0314169	1.88772	Dsec\GM23671	scaffold_0	3.13954	14.7029	CG13409-PA	3R	3.55431	26.0908	Dyak\GE24062	3R	0.027113	1.06399	Dyak\GE24062	3R	0.0342338	1.03876	Dere\GG12542	scaffold_4820	2.24344	13.3931	Dana\GF16949	scaffold_13340	2.17707	15.7266	Dpse\GA12265	2	0.0874362	0.678382	Dper\GL24010	dper_scaffold_0	1.44091	4.24895	FBpp0281875-D1_1	Muller-E	0.177808	3.77368	Dwil\GK13003	dwil_scf2_1100000004943	0.00522169	0.0128761
CG10731	st5	2R	FBgn0034081	17.2636	3.55017	Dsim\GD25566	Scf_2R	15.2393	1.77658	Dsec\GM20089	scaffold_1	21.9343	4.40189	CG10731-PA	2R	24.3645	8.20938	Dyak\GE14096	2R	3.89854	0.206751	Dyak\GE14096	2R	14.6226	0.631945	Dere\GG22300	scaffold_4845	5.78688	1.35194	Dana\GF13048	scaffold_13266	0.686787	14.4144	Dpse\GA24708	3	17.7739	47.4157	Dper\GL11395	dper_scaffold_2	18.3205	16.0595	FBpp0277587-D1_1	Muller-C	39.1965	123.17	Dwil\GK19097	dwil_scf2_1100000004514	11.2228	25.6808
GlcAT-P	st5	3L	FBgn0036144	25.6501	10.9118	Dsim\GD12815	Scf_3L	44.6182	1.1199	Dsec\GM24766	scaffold_0	45.6769	7.99037	GlcAT-P-PA	3L	34.9108	5.68796	Dyak\GlcAT-P	3L	19.644	0.723013	Dyak\GlcAT-P	3L	33.473	0.788395	Dere\GG13931	scaffold_4784	41.3238	7.68763	Dana\GF24562	scaffold_13337	17.8463	3.51721	Dpse\GA19440	XR_group6	17.4757	0.247347	Dper\GL22838	dper_scaffold_20	49.6933	0.473004	FBpp0275432-D1_1	Muller-AD	25.301	2.95388	Dwil\GK20549	dwil_scf2_1100000004768	12.025	0.0643771
CG10405	st5	3R	FBgn0038431	0.0591632	2.05744	Dsim\GD19101	Scf_3R	0.0151934	2.05222	Dsec\GM15158	scaffold_12	0.0577106	2.27379	CG10405-PB	3R	0.0285574	0.762171	Dyak\GE24397	3R	0.0494886	1.66319	Dyak\GE24397	3R	0.0840734	0.856751	Dere\GG17005	scaffold_4770	3.57669	6.70509	Dana\GF18498	scaffold_13340	0.112161	4.79169	Dpse\GA10299	2	0	0.0601179	Dper\GL22176	dper_scaffold_3	0	0	FBpp0284435-D1_1	Muller-E	0	0	Dwil\GK14481	dwil_scf2_1100000004943	0	0
tai	st2	2L	FBgn0041092	1.8167	1.64113	Dsim\GD23591	Scf_2L	2.81905	0.851642	Dsec\GM17417	scaffold_3	3.60164	2.19907					Dyak\GE18829	2L	0.835225	1.33411	Dyak\GE18829	2L	0.612546	0.574642	Dere\GG25335	scaffold_4929	1.20387	0.167087	Dana\GF22712	scaffold_12943	2.88532	0.441195	Dpse\GA12050	4_group5	6.95277	0.31979	Dper\GL26249	dper_scaffold_5	11.8512	1.36925	FBpp0285818-D1_1	Muller-B	9.08388	0.272848	Dwil\GK15071	dwil_scf2_1100000004521	7.09601	1.48253
brn	st2	X	FBgn0000221	10.4421	9.97618	Dsim\GD16669	Scf_X	11.555	3.98271	Dsec\GM12324	scaffold_4	7.68893	3.31316	brn-PA	X	4.64772	0.249515	Dyak\GE16330	X	0	1.83093e-120	Dyak\GE16330	X	5.48882e-175	0.822671	Dere\GG18691	scaffold_4690	3.7879	6.6451	Dana\GF20775	scaffold_13117	20.4456	14.4114	Dpse\GA18536	XL_group1e	15.5714	12.4313	Dper\GL21389	dper_scaffold_60	29.4928	12.004	FBpp0285041-D1_1	Muller-A	32.9368	14.0415	Dwil\GK15559	dwil_scf2_1100000004963	17.319	23.236
brn	st5	X	FBgn0000221	10.4421	9.97618	Dsim\GD16669	Scf_X	11.555	3.98271	Dsec\GM12324	scaffold_4	7.68893	3.31316	brn-PA	X	4.64772	0.249515	Dyak\GE16330	X	0	1.83093e-120	Dyak\GE16330	X	5.48882e-175	0.822671	Dere\GG18691	scaffold_4690	3.7879	6.6451	Dana\GF20775	scaffold_13117	20.4456	14.4114	Dpse\GA18536	XL_group1e	15.5714	12.4313	Dper\GL21389	dper_scaffold_60	29.4928	12.004	FBpp0285041-D1_1	Muller-A	32.9368	14.0415	Dwil\GK15559	dwil_scf2_1100000004963	17.319	23.236
CG14221	st5	X	FBgn0031042	7.25015	9.10825	Dsim\GD24456	Scf_X	0.0429144	0.117575	Dsec\GM22726	scaffold_8	20.9219	101.043	CG14221-PB	X	0.0893824	0.524391	Dyak\GE17371	X	0.130614	0.379599	Dyak\GE17371	X	0.0298103	0.856322	Dere\GG18042	scaffold_4690	4.42033	26.2508	Dana\GF20278	scaffold_13417	5.64249	26.137	Dpse\GA12835	XL_group1a	3.59301	11.3119	Dper\GL27104	dper_scaffold_63	0.145916	1.69262	FBpp0272843-D1_1	Muller-A	0.0233325	0.70485
CG14229	st5	X	FBgn0031059	37.3147	6.42542	Dsim\GD24449	Scf_X	31.3784	15.8913	Dsec\GM22715	scaffold_8	40.7091	36.9511	CG14229-PA	X	29.1418	2.79892	Dyak\GE17359	X	17.972	0.279615	Dyak\GE17359	X	18.4573	0.162849	Dere\GG18030	scaffold_4690	21.8502	20.7828	Dana\GF20268	scaffold_13417	60.4291	22.569	Dpse\GA27433	XL_group1e	15.8984	2.11923	Dper\GL18306	dper_scaffold_30	25.5939	3.63119	FBpp0284523-D1_1	Muller-A	36.4057	5.13352	Dwil\GK15919	dwil_scf2_1100000004963	25.1574	9.23293
CG3184	st2	X	FBgn0029892	5.0629	7.01888					Dsec\GM12563	scaffold_4	2.55553	1.31521	CG3184-PA	X	1.35237	6.27386	Dyak\GE16453	X	0	0.413314	Dyak\GE16453	X	1.01279e-16	1.27579	Dere\GG17664	scaffold_4690	10.4686	4.36342	Dana\GF20846	scaffold_13117	6.49991e-294	3.68617	Dpse\GA16516	XL_group1a	3.59494	15.4287	Dper\GL13368	dper_scaffold_26	8.78398e-62	10.1933	FBpp0273126-D1_1	Muller-A	11.4853	54.1341	Dwil\GK25004	dwil_scf2_1100000004909	3.24528	11.147
CG15386	st5		FBgn0040715			Dsim\GD22863	Scf_2L	37.3789	27.4026	Dsec\GM18254	scaffold_5	52.6081	61.6783	CG15386-PA	2L	57.5201	63.8591	Dyak\GE15193	2L	25.3016	3.11992e-23	Dyak\GE15193	2L	26.9569	5.70962e-05	Dere\GG24546	scaffold_4929	39.578	72.2993	Dana\GF19705	scaffold_12916	25.1154	51.7793	Dpse\GA13692	4_group3	33.2496	16.4318	Dper\GL19414	dper_scaffold_1	63.359	77.9543					Dwil\GK19041	dwil_scf2_1100000004521	1.27229	8.00551e-15
ATPsynE	st2		FBgn0038224							Dsec\GM24162	scaffold_0	84.488	302.072					Dyak\GE24232	3R	4.7247e-27	9.1155	Dyak\GE24232	3R	0.00214417	1.0636e-08	Dere\GG16851	scaffold_4770	7.85682	0.000140421	Dana\GF17508	scaffold_13340	214.583	1152.43	Dpse\GA17372	2	85.2799	369.134	Dper\GL23504	dper_scaffold_0	149.27	819.359	FBpp0284107-D1_1	Muller-E	62.3976	113.507	Dwil\GK10942	dwil_scf2_1100000004902	213.871	813.699
[truncated: 8 more columns]
